# Supplementary material for: Single-PanIN-seq unveils that ARID1A deficiency promotes pancreatic tumorigenesis by attenuating KRAS-induced senescence
Source: eLife journal article supplement (doi:10.7554/elife.64204), 2021-05-13
Supplement: supp [file elife_poa_e64204_Figure_5_figure_supplement_2.pdf › elife_poa_e64204_Figure_5_figure_supplement_2.pdf]

**A** Gained / Strengthened distal regions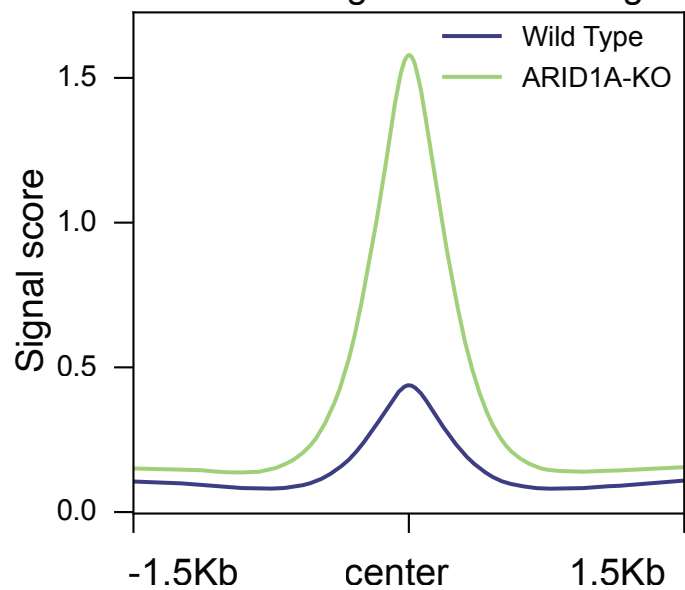**B** Lost / Weakened distal regions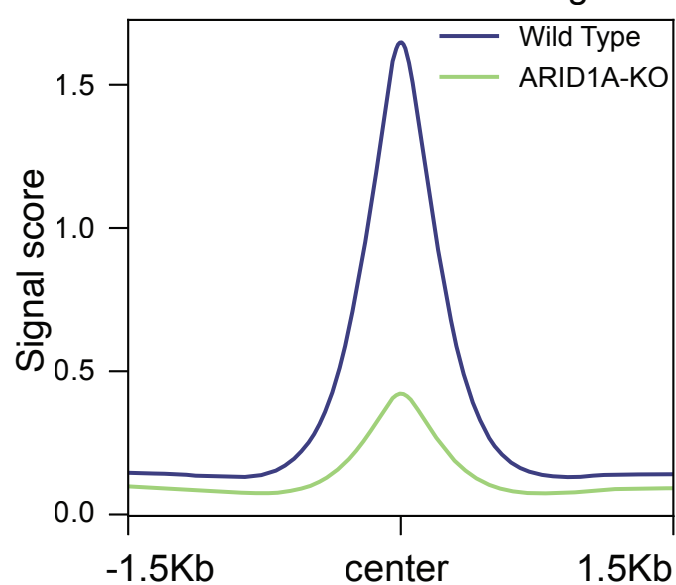**C** Gained / Strengthened promoters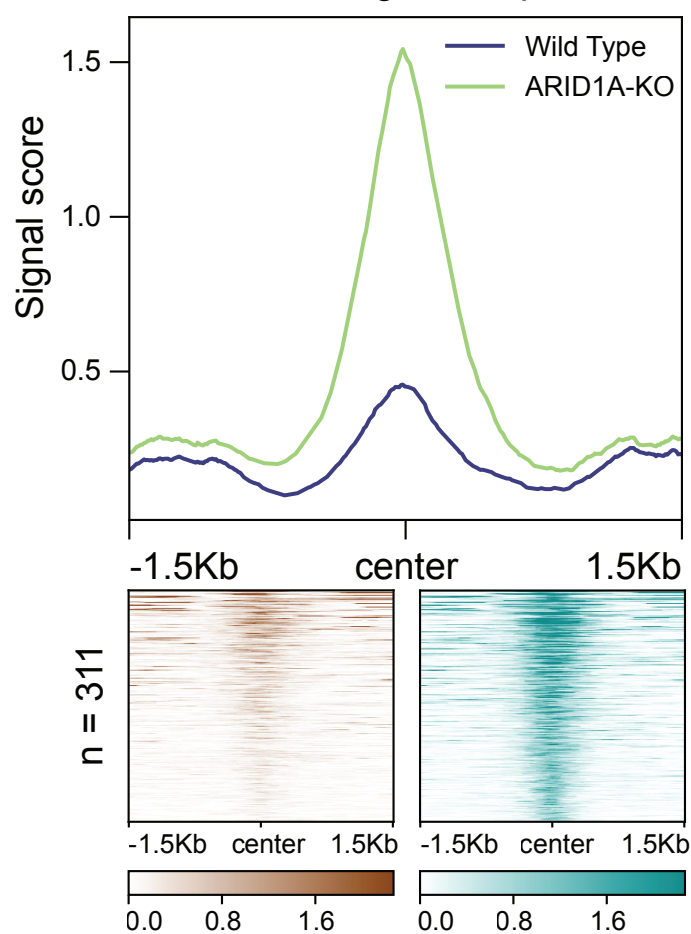**D** Lost / Weakened promoters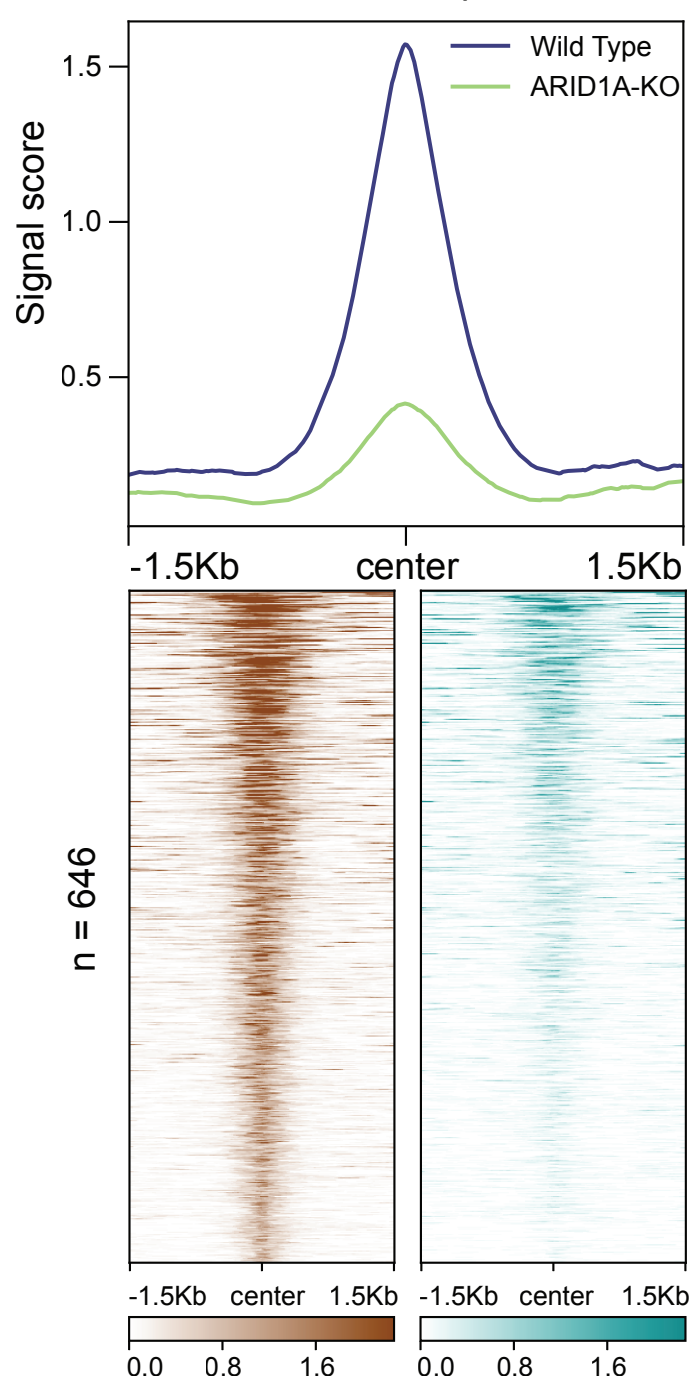

Figure 5-figure supplement 2
