# Supplementary material for: Single-PanIN-seq unveils that ARID1A deficiency promotes pancreatic tumorigenesis by attenuating KRAS-induced senescence
Source: eLife journal article supplement (doi:10.7554/elife.64204), 2021-05-13
Supplement: supp [file elife_poa_e64204_Figure_5_figure_supplement_3.pdf › elife_poa_e64204_Figure_5_figure_supplement_3.pdf]

A

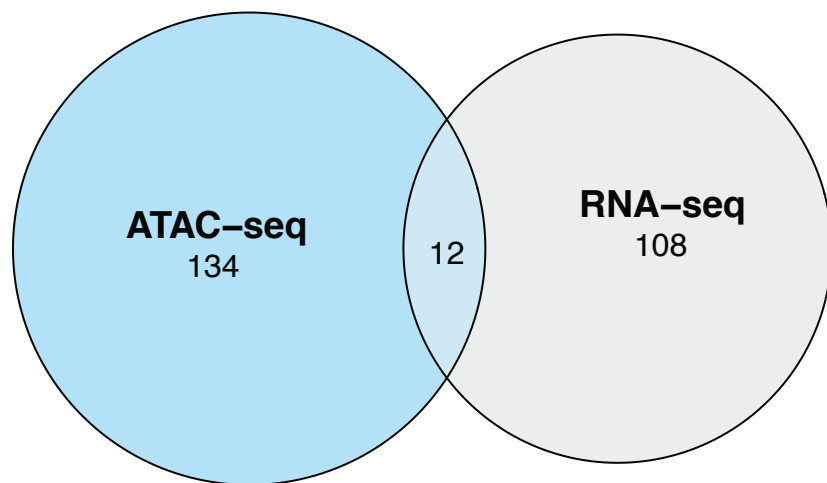

Expected overlap: 1.9  
Fisher's test:  $p = 8.16e-07$

B

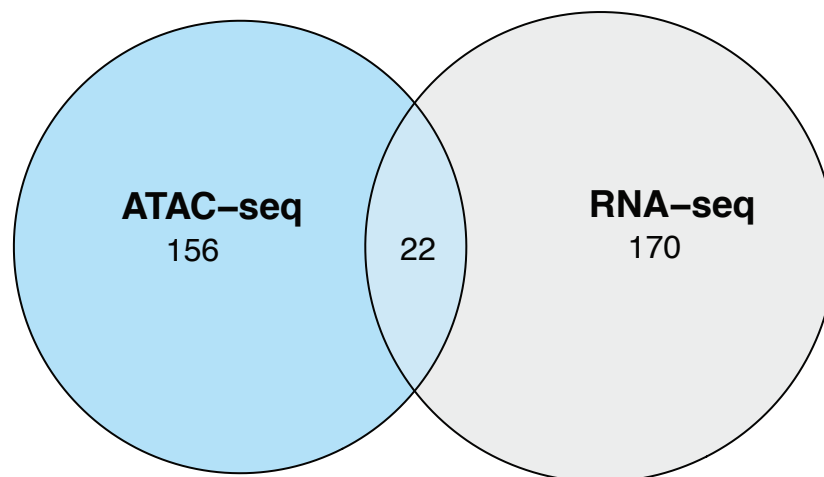

Expected overlap: 3.7  
Fisher's test:  $p = 9.96e-11$

C

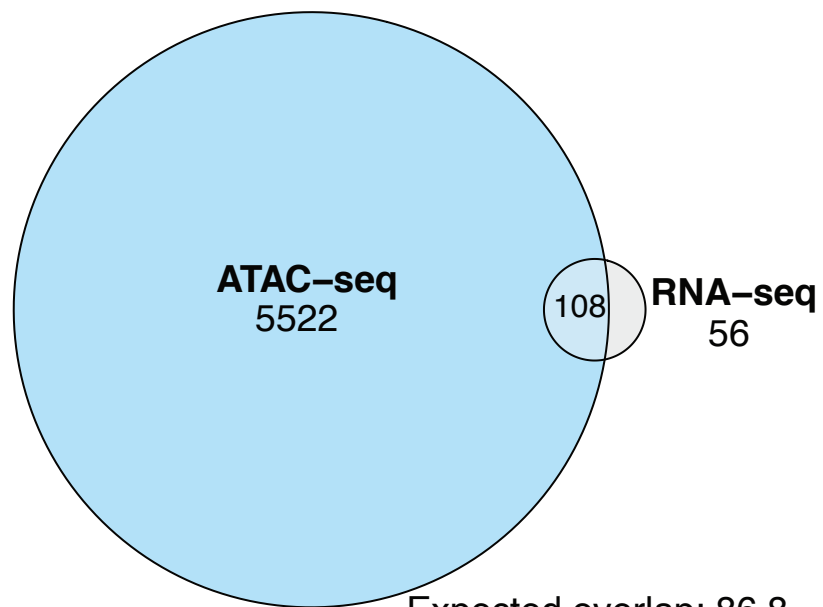

Expected overlap: 86.8  
Fisher's test:  $p = 0.001163$

D

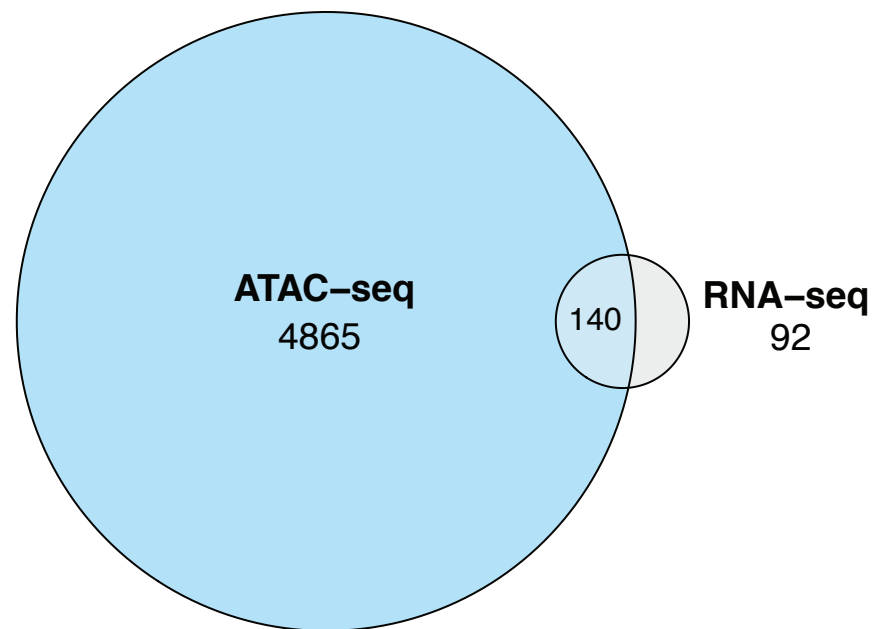

Expected overlap: 109.2  
Fisher's test:  $p = 0.00006303$
