# Supplementary material for: Single-PanIN-seq unveils that ARID1A deficiency promotes pancreatic tumorigenesis by attenuating KRAS-induced senescence
Source: eLife journal article supplement (doi:10.7554/elife.64204), 2021-05-13
Supplement: supp [file elife_poa_e64204_Figure_5_figure_supplement_6.pdf › elife_poa_e64204_Figure_5_figure_supplement_6.pdf]

A

| Motif sequence<br>logo                                                            | <i>p</i> -value | TF family  |
|-----------------------------------------------------------------------------------|-----------------|------------|
|  | 7.90e-15        | FOX family |
|  | 1.08e-12        | SRY        |
|  | 1.68e-12        | CDX1       |
|  | 4.89e-8         | TEAD4      |
|  | 9.64e-8         | SOX5       |

B

| Motif sequence<br>logo                                                              | <i>p</i> -value | TF family  |
|-------------------------------------------------------------------------------------|-----------------|------------|
|  | 4.31e-45        | FOS family |
|  | 2.40e-42        | JUN family |
|  | 1.23e-21        | BACH2      |
|  | 6.12e-21        | MAFB       |
|  | 1.58e-16        | NFE2       |

Figure 5-supplement figure 6
