# Supplementary material for: Single-PanIN-seq unveils that ARID1A deficiency promotes pancreatic tumorigenesis by attenuating KRAS-induced senescence
Source: eLife. 2021 May 13;10:e64204. doi: 10.7554/eLife.64204 (PMC8203294; doi:10.7554/eLife.64204)
Supplement: Supplementary file 1. [file elife-64204-supp1.xlsx]

## Sheet: gsea_report_for_AKC_15601862985
NAME	GS<br> follow link to MSigDB	GS DETAILS	SIZE	ES	NES	NOM p-val	FDR q-val	FWER p-val	RANK AT MAX	LEADING EDGE
HALLMARK_KRAS_SIGNALING_DN	HALLMARK_KRAS_SIGNALING_DN	Details ...	185	0.455281	1.70313	0	0.0644052	0.119	7593	tags=52%, list=29%, signal=72%
HALLMARK_SPERMATOGENESIS	HALLMARK_SPERMATOGENESIS	Details ...	129	0.38647	1.66921	0.00566038	0.0490361	0.158	7481	tags=41%, list=28%, signal=57%
HALLMARK_E2F_TARGETS	HALLMARK_E2F_TARGETS	Details ...	193	0.402409	1.37806	0.159844	0.276955	0.595	5863	tags=38%, list=22%, signal=49%
HALLMARK_BILE_ACID_METABOLISM	HALLMARK_BILE_ACID_METABOLISM	Details ...	110	0.32164	1.32088	0.11002	0.280669	0.686	6337	tags=39%, list=24%, signal=51%
HALLMARK_MYOGENESIS	HALLMARK_MYOGENESIS	Details ...	192	0.284014	1.28736	0.0834915	0.265479	0.736	5411	tags=32%, list=21%, signal=40%
HALLMARK_G2M_CHECKPOINT	HALLMARK_G2M_CHECKPOINT	Details ...	191	0.322784	1.16551	0.279441	0.393274	0.897	5901	tags=38%, list=22%, signal=49%
HALLMARK_MYC_TARGETS_V2	HALLMARK_MYC_TARGETS_V2	Details ...	56	0.311835	1.0399	0.391714	0.550059	0.959	2220	tags=11%, list=8%, signal=12%
HALLMARK_PEROXISOME	HALLMARK_PEROXISOME	Details ...	97	0.262432	1.02758	0.419679	0.502385	0.962	4817	tags=27%, list=18%, signal=33%
HALLMARK_GLYCOLYSIS	HALLMARK_GLYCOLYSIS	Details ...	197	0.231161	1.00187	0.448207	0.489611	0.97	5240	tags=27%, list=20%, signal=34%
HALLMARK_FATTY_ACID_METABOLISM	HALLMARK_FATTY_ACID_METABOLISM	Details ...	152	0.232613	0.882381	0.60757	0.639733	0.994	2612	tags=16%, list=10%, signal=17%
HALLMARK_PANCREAS_BETA_CELLS	HALLMARK_PANCREAS_BETA_CELLS	Details ...	40	0.23169	0.799407	0.772031	0.725179	1	6175	tags=25%, list=23%, signal=33%
HALLMARK_OXIDATIVE_PHOSPHORYLATION	HALLMARK_OXIDATIVE_PHOSPHORYLATION		192	-0.207529	-0.674171	0.785276	0.900113	1	4407	tags=26%, list=17%, signal=31%
HALLMARK_UNFOLDED_PROTEIN_RESPONSE	HALLMARK_UNFOLDED_PROTEIN_RESPONSE		106	-0.25586	-0.844946	0.620352	0.659542	0.998	4247	tags=29%, list=16%, signal=35%
HALLMARK_PROTEIN_SECRETION	HALLMARK_PROTEIN_SECRETION		93	-0.307492	-0.86628	0.594378	0.637162	0.998	2794	tags=23%, list=11%, signal=25%
HALLMARK_DNA_REPAIR	HALLMARK_DNA_REPAIR		138	-0.227961	-0.908434	0.565392	0.578504	0.995	3876	tags=25%, list=15%, signal=30%
HALLMARK_ADIPOGENESIS	HALLMARK_ADIPOGENESIS		189	-0.279695	-1.05099	0.357873	0.364946	0.959	3297	tags=25%, list=13%, signal=29%
HALLMARK_MITOTIC_SPINDLE	HALLMARK_MITOTIC_SPINDLE		196	-0.275637	-1.06375	0.376754	0.359424	0.953	1973	tags=19%, list=7%, signal=21%
HALLMARK_MYC_TARGETS_V1	HALLMARK_MYC_TARGETS_V1		191	-0.350595	-1.07979	0.39165	0.346059	0.94	4958	tags=39%, list=19%, signal=48%
HALLMARK_WNT_BETA_CATENIN_SIGNALING	HALLMARK_WNT_BETA_CATENIN_SIGNALING		42	-0.301787	-1.13117	0.252016	0.29343	0.904	2838	tags=31%, list=11%, signal=35%
HALLMARK_APICAL_SURFACE	HALLMARK_APICAL_SURFACE		41	-0.318348	-1.20843	0.19917	0.216166	0.802	1788	tags=24%, list=7%, signal=26%
HALLMARK_PI3K_AKT_MTOR_SIGNALING	HALLMARK_PI3K_AKT_MTOR_SIGNALING		102	-0.354003	-1.30428	0.160396	0.142144	0.677	3985	tags=33%, list=15%, signal=39%
HALLMARK_MTORC1_SIGNALING	HALLMARK_MTORC1_SIGNALING		195	-0.377319	-1.32784	0.1875	0.130761	0.639	4044	tags=34%, list=15%, signal=40%
HALLMARK_HEDGEHOG_SIGNALING	HALLMARK_HEDGEHOG_SIGNALING		35	-0.351268	-1.34844	0.0598802	0.120852	0.608	1601	tags=23%, list=6%, signal=24%
HALLMARK_APOPTOSIS	HALLMARK_APOPTOSIS		153	-0.323986	-1.36254	0.0646465	0.114746	0.575	3175	tags=31%, list=12%, signal=35%
HALLMARK_HEME_METABOLISM	HALLMARK_HEME_METABOLISM		184	-0.340429	-1.39445	0.0672269	0.0995217	0.523	3684	tags=31%, list=14%, signal=36%
HALLMARK_REACTIVE_OXIGEN_SPECIES_PATHWAY	HALLMARK_REACTIVE_OXIGEN_SPECIES_PATHWAY		45	-0.40868	-1.39472	0.0868687	0.103238	0.523	3736	tags=44%, list=14%, signal=52%
HALLMARK_ANGIOGENESIS	HALLMARK_ANGIOGENESIS		34	-0.413764	-1.43683	0.0658436	0.0854224	0.466	3496	tags=41%, list=13%, signal=47%
HALLMARK_ESTROGEN_RESPONSE_LATE	HALLMARK_ESTROGEN_RESPONSE_LATE		194	-0.30713	-1.46002	0.0203666	0.0780244	0.443	1990	tags=22%, list=8%, signal=24%
HALLMARK_XENOBIOTIC_METABOLISM	HALLMARK_XENOBIOTIC_METABOLISM		192	-0.352524	-1.52015	0.0149254	0.0545222	0.348	1820	tags=18%, list=7%, signal=19%
HALLMARK_ANDROGEN_RESPONSE	HALLMARK_ANDROGEN_RESPONSE		95	-0.444907	-1.52908	0.0576132	0.0541508	0.338	2035	tags=31%, list=8%, signal=33%
HALLMARK_INTERFERON_ALPHA_RESPONSE	HALLMARK_INTERFERON_ALPHA_RESPONSE	Details ...	89	-0.390012	-1.52945	0.0392562	0.0567083	0.337	4947	tags=39%, list=19%, signal=48%
HALLMARK_NOTCH_SIGNALING	HALLMARK_NOTCH_SIGNALING	Details ...	32	-0.473272	-1.5298	0.0410959	0.0595925	0.337	2470	tags=34%, list=9%, signal=38%
HALLMARK_UV_RESPONSE_DN	HALLMARK_UV_RESPONSE_DN	Details ...	137	-0.351623	-1.52993	0.0182556	0.0629032	0.337	2421	tags=22%, list=9%, signal=24%
HALLMARK_COAGULATION	HALLMARK_COAGULATION	Details ...	129	-0.368579	-1.57666	0.01	0.045751	0.265	3772	tags=30%, list=14%, signal=35%
HALLMARK_UV_RESPONSE_UP	HALLMARK_UV_RESPONSE_UP	Details ...	148	-0.3659	-1.61979	0.00402414	0.0356217	0.214	3331	tags=32%, list=13%, signal=37%
HALLMARK_ESTROGEN_RESPONSE_EARLY	HALLMARK_ESTROGEN_RESPONSE_EARLY	Details ...	196	-0.36384	-1.65237	0.006	0.0290971	0.175	2302	tags=26%, list=9%, signal=28%
HALLMARK_HYPOXIA	HALLMARK_HYPOXIA	Details ...	190	-0.360823	-1.66657	0	0.0266852	0.153	3528	tags=29%, list=13%, signal=33%
HALLMARK_COMPLEMENT	HALLMARK_COMPLEMENT	Details ...	181	-0.373298	-1.68742	0.002079	0.0220983	0.13	3699	tags=30%, list=14%, signal=34%
HALLMARK_EPITHELIAL_MESENCHYMAL_TRANSITION	HALLMARK_EPITHELIAL_MESENCHYMAL_TRANSITION	Details ...	193	-0.439771	-1.78913	0.00625	0.00852297	0.06	3096	tags=34%, list=12%, signal=38%
HALLMARK_IL2_STAT5_SIGNALING	HALLMARK_IL2_STAT5_SIGNALING	Details ...	192	-0.406493	-1.80256	0	0.00793656	0.055	2925	tags=28%, list=11%, signal=31%
HALLMARK_INFLAMMATORY_RESPONSE	HALLMARK_INFLAMMATORY_RESPONSE	Details ...	192	-0.404017	-1.80724	0.004158	0.0083469	0.053	2182	tags=22%, list=8%, signal=24%
HALLMARK_TGF_BETA_SIGNALING	HALLMARK_TGF_BETA_SIGNALING	Details ...	53	-0.57443	-1.81073	0.00604839	0.00857313	0.051	2569	tags=43%, list=10%, signal=48%
HALLMARK_KRAS_SIGNALING_UP	HALLMARK_KRAS_SIGNALING_UP	Details ...	189	-0.429106	-1.84996	0	0.00539499	0.031	4302	tags=39%, list=16%, signal=46%
HALLMARK_INTERFERON_GAMMA_RESPONSE	HALLMARK_INTERFERON_GAMMA_RESPONSE	Details ...	184	-0.455381	-1.8607	0.00204499	0.00563204	0.029	4185	tags=36%, list=16%, signal=42%
HALLMARK_APICAL_JUNCTION	HALLMARK_APICAL_JUNCTION	Details ...	192	-0.422666	-1.9078	0	0.00259416	0.012	3613	tags=36%, list=14%, signal=41%
HALLMARK_CHOLESTEROL_HOMEOSTASIS	HALLMARK_CHOLESTEROL_HOMEOSTASIS	Details ...	71	-0.612723	-1.9278	0	0.00250535	0.01	3345	tags=45%, list=13%, signal=51%
HALLMARK_ALLOGRAFT_REJECTION	HALLMARK_ALLOGRAFT_REJECTION	Details ...	182	-0.447308	-1.93855	0	0.00268335	0.008	2242	tags=25%, list=9%, signal=27%
HALLMARK_P53_PATHWAY	HALLMARK_P53_PATHWAY	Details ...	193	-0.510958	-1.99911	0	0.00161389	0.003	2777	tags=37%, list=11%, signal=41%
HALLMARK_IL6_JAK_STAT3_SIGNALING	HALLMARK_IL6_JAK_STAT3_SIGNALING	Details ...	85	-0.584368	-2.10188	0	0.0019875	0.002	3561	tags=44%, list=14%, signal=50%
HALLMARK_TNFA_SIGNALING_VIA_NFKB	HALLMARK_TNFA_SIGNALING_VIA_NFKB	Details ...	191	-0.546166	-2.13762	0	0.000975	0.001	2235	tags=36%, list=8%, signal=39%
