# Supplementary material for: Single-PanIN-seq unveils that ARID1A deficiency promotes pancreatic tumorigenesis by attenuating KRAS-induced senescence
Source: eLife. 2021 May 13;10:e64204. doi: 10.7554/eLife.64204 (PMC8203294; doi:10.7554/eLife.64204)
Supplement: Supplementary file 2. [file elife-64204-supp2.xlsx]

## Sheet: DGE.061019
Symbol	logFC	PValue	FDR	AKC	KC
Aldh1a3	-5.2032	2.45e-120	6.46e-116	12.8249	481.43
Tsix	4.57648	1.73e-42	2.28e-38	109.039	4.61494
Lama5	-3.71269	8.84e-41	7.76e-37	49.1728	646.234
Ecm1	-4.02427	3.32e-36	2.19e-32	6.33758	103.009
Kdm5d	-4.17922	1.17e-32	6.17e-29	3.98814	82.5629
Gp2	-4.76622	1.91e-32	8.39e-29	2.37329	71.2167
Msn	-3.48544	3.25e-29	1.22e-25	9.74554	110.033
Flna	-3.12239	3.59e-26	1.18e-22	37.8781	326.514
Slc4a11	-3.75352	1.14e-25	3.33e-22	5.34029	72.9657
Otop3	-3.61985	3.48e-25	9.17e-22	8.74784	114.888
Endod1	-3.28666	5.36e-25	1.28e-21	9.01451	95.4563
Uty	-4.28101	1.04e-24	2.28e-21	3.05533	54.8934
Nos1	2.8459	1.03e-23	2.09e-20	163.947	22.9742
Adgre5	-3.03197	2e-23	3.76e-20	11.8988	108.565
Nfe2l3	-3.09523	2.26e-23	3.98e-20	10.437	101.079
Gcnt2	-2.71299	3.78e-23	6.23e-20	24.5435	164.84
Ehd2	-3.39777	4.52e-23	7e-20	8.64856	91.8422
Tmem176b	-3.10846	6.17e-23	9.03e-20	10.1895	96.5861
Tnip3	-3.1039	7.33e-23	1.02e-19	10.4832	97.6932
Anxa2	-2.28568	1.88e-22	2.39e-19	138.142	678.703
Basp1	-3.35737	1.9e-22	2.39e-19	7.92016	79.3809
Pdcd4	2.35445	5.6e-22	6.71e-19	471.815	91.5587
Ffar2	3.94259	6.54e-22	7.5e-19	56.7183	3.32442
Npnt	-3.02671	7.32e-22	8.04e-19	12.4295	97.5651
Wdr72	-2.62412	9.98e-22	1.05e-18	28.1417	184.268
Dlgap5	3.89834	7.49e-21	7.6e-18	57.4455	3.07788
Trerf1	2.9268	1.7e-20	1.66e-17	110.286	14.7603
Ceacam2	-4.69747	2.73e-20	2.57e-17	2.00871	55.1911
Cxcl16	-2.73627	5.23e-20	4.76e-17	17.0767	118.256
Clcf1	-3.3904	5.77e-20	5.07e-17	6.5255	64.1804
Angptl7	3.01068	2.69e-19	2.29e-16	93.624	11.6043
Krt7	-4.70762	7.08e-19	5.83e-16	25.6728	670.176
Srm	2.53353	9e-19	7.19e-16	171.208	28.9632
Pdlim7	-2.43802	1.36e-18	1.05e-15	33.2181	179.495
4930515G01Rik	2.95427	2.29e-18	1.73e-15	137.695	17.5661
Olfm4	-4.2469	2.84e-18	2.08e-15	1.4642	37.1888
A430105I19Rik	-3.00975	3.25e-18	2.32e-15	9.89317	77.916
Anxa8	-3.87223	5.8e-18	3.92e-15	2.43621	42.1985
Pacsin1	2.52291	5.76e-18	3.92e-15	162.744	28.5811
Tmem176a	-2.8507	1.76e-17	1.16e-14	12.2167	89.6448
Fam167a	-3.28587	2.24e-17	1.44e-14	5.66518	57.5191
Akr1c14	4.17533	2.46e-17	1.54e-14	38.3855	1.97348
Galnt5	3.69177	6.08e-17	3.73e-14	45.5156	3.36531
Xist	5.14135	7.09e-17	4.25e-14	1908.38	55.0965
Pik3cg	-2.59561	1.23e-16	7.19e-14	16.882	107.112
C4b	-3.49363	1.45e-16	8.3e-14	5.91183	71.2632
Ly6a	-4.75442	1.96e-16	1.1e-13	0.686174	26.5413
Spp1	-6.40736	4.57e-16	2.51e-13	6.15793	588.66
Ptgs1	-3.14736	6.4e-16	3.44e-13	5.39198	54.6987
Il4ra	-2.1274	9.51e-16	4.92e-13	73.0453	326.476
Mall	-2.73521	9.4e-16	4.92e-13	16.7797	118.212
Inpp5d	-2.77222	1.87e-15	9.46e-13	9.6188	74.8308
Pga5	5.08336	2.75e-15	1.36e-12	23.0237	0.21597
Zfp281	2.30649	2.79e-15	1.36e-12	207.697	40.0099
Sh3bgrl3	-2.1034	5.77e-15	2.76e-12	68.8021	302.763
Lamc2	-2.0053	1.49e-14	7.02e-12	131.212	532.963
Ifitm2	-2.93747	1.57e-14	7.24e-12	6.32266	57.0033
F3	-3.39766	1.97e-14	8.93e-12	9.30654	104.49
Slc1a3	2.63722	2.38e-14	1.06e-11	87.6963	14.4963
Gpt2	2.47602	3.08e-14	1.35e-11	107.603	18.489
Npy	-4.56798	3.33e-14	1.44e-11	3.68592	84.771
Sema3e	-2.68554	3.41e-14	1.45e-11	10.8773	73.5011
Gm3054	-4.62958	1.04e-13	4.34e-11	0.559897	19.8992
Eif2s3y	-4.12603	1.07e-13	4.41e-11	1.46371	26.1792
Ret	-2.5902	1.98e-13	8.02e-11	20.751	126.181
Lhx1	2.63107	6.42e-13	2.56e-10	75.3661	11.77
Ivl	-6.07458	6.7e-13	2.63e-10	2.20329	177.755
Ppif	2.10777	1.09e-12	4.17e-10	215.985	48.5406
Ubxn11	-2.39323	1.08e-12	4.17e-10	17.176	91.7538
Mir6240	1.90534	1.48e-12	5.57e-10	794.419	212.825
Aldh3a1	3.87113	1.67e-12	6.19e-10	28.793	1.35767
Gm9899	2.55858	2.2e-12	8.07e-10	72.6942	12.0508
Sult1d1	2.33454	2.86e-12	1.03e-09	97.8467	19.1509
Il18rap	-3.11224	3.3e-12	1.18e-09	4.18521	38.7064
Tln2	2.40821	6.48e-12	2.28e-09	84.0576	15.8678
Siglecf	-2.77272	6.62e-12	2.3e-09	7.52742	53.8376
Gsdma2	7.31613	1.05e-11	3.61e-09	537.57	2.513
Rgs2	-2.94763	1.15e-11	3.88e-09	5.43143	41.819
Alox5ap	-2.88272	1.26e-11	4.2e-09	4.8849	41.9978
Il1rn	-3.79631	1.62e-11	5.34e-09	15.1218	221.608
Igdcc4	2.19342	1.79e-11	5.82e-09	115.725	24.6057
Wfdc2	-2.5488	2.12e-11	6.81e-09	10.019	61.7729
Antxr2	-2.58614	2.29e-11	7.28e-09	10.1381	59.3609
Runx2	-2.33904	2.52e-11	7.91e-09	17.2199	83.0233
Fhl1	4.49714	2.87e-11	8.89e-09	139.707	5.07349
Ceacam1	-3.02092	3.22e-11	9.85e-09	74.5977	622.586
Rasgrf1	-2.06671	3.59e-11	1.09e-08	35.6279	147.785
Plekhs1	-2.5931	4.36e-11	1.31e-08	8.33787	54.0747
Il33	-3.33441	4.87e-11	1.44e-08	2.46417	31.2813
Trpv4	2.80033	8.4e-11	2.46e-08	48.4159	6.22479
Ctnnd2	3.24943	9.26e-11	2.68e-08	320.387	34.1864
Ltf	-4.86012	9.45e-11	2.71e-08	3.05587	121.579
Ksr2	2.39644	9.56e-11	2.71e-08	74.5452	13.12
Fam222a	2.56692	1.13e-10	3.18e-08	60.1197	9.16194
Pdk4	2.47693	1.15e-10	3.2e-08	62.2028	10.8667
Cd79a	-3.75627	1.2e-10	3.28e-08	1.45568	23.2032
Parp8	-2.62591	1.66e-10	4.5e-08	6.97152	48.143
Grin2d	2.32714	1.79e-10	4.82e-08	82.1285	15.5583
Ihh	2.73806	1.98e-10	5.26e-08	44.645	6.52429
Chst4	-3.27718	2.64e-10	6.96e-08	2.42574	26.9409
Ddx3y	-3.917	2.7e-10	7.05e-08	0.718568	17.2769
Gabra1	-2.53191	4.67e-10	1.21e-07	8.46057	51.4792
Mmp7	-3.88197	4.81e-10	1.23e-07	0.667096	16.6973
Aim2	-2.89139	4.88e-10	1.24e-07	4.50649	35.4129
Gdap1	2.58809	5.01e-10	1.26e-07	55.5514	9.14053
Sprr1a	-4.88356	5.05e-10	1.26e-07	1.683	72.5657
Setd7	-2.26397	5.42e-10	1.34e-07	16.0994	75.1234
Muc20	-2.39046	5.49e-10	1.34e-07	11.8323	64.9542
Muc3	-6.0589	6.09e-10	1.47e-07	2.31373	176.028
Pear1	-2.18562	6.36e-10	1.52e-07	18.4944	85.5317
Chrm1	3.18928	7.03e-10	1.67e-07	28.5404	2.7227
Scn1b	2.1325	7.47e-10	1.76e-07	104.48	23.9747
Kcnj15	4.57791	7.58e-10	1.77e-07	189.358	7.35965
Hspa12b	3.29614	8.37e-10	1.94e-07	27.3334	2.1136
Nt5c1a	-3.08908	1.05e-09	2.4e-07	3.25622	27.8777
Gm32742	2.14588	1.08e-09	2.45e-07	153.384	33.8508
Ttc9	-2.56306	1.12e-09	2.53e-07	7.36008	46.4676
Rfx6	-3.99552	1.16e-09	2.59e-07	11.1135	191.056
H2-Ab1	-2.75965	1.32e-09	2.92e-07	4.91253	38.0893
Mndal	-2.99482	1.42e-09	3.13e-07	3.59681	31.3178
Hspa1a	-3.16106	1.75e-09	3.82e-07	2.32646	25.347
Gm12061	2.48643	1.78e-09	3.84e-07	54.9634	9.47549
Tinagl1	-2.07262	2.15e-09	4.6e-07	22.339	96.7666
Iglc1	-4.12473	2.21e-09	4.71e-07	0.171254	12.1116
Ubiad1	2.10779	2.44e-09	5.14e-07	96.149	21.43
Map1a	-2.27572	2.48e-09	5.19e-07	13.5927	64.4025
Hmmr	2.79799	2.63e-09	5.41e-07	36.5835	4.75405
Sh2d7	-3.90621	2.62e-09	5.41e-07	11.1722	192.123
Dlk2	2.46641	2.96e-09	6.04e-07	54.2944	9.57973
Serpinb1a	-2.07659	3.25e-09	6.58e-07	23.4131	107.199
Clec4a1	-2.94478	4.14e-09	8.33e-07	3.27163	27.8393
Cldn4	-3.40987	5.19e-09	1.04e-06	3.22136	36.19
Tuba1a	-2.96856	5.26e-09	1.04e-06	2.72343	27.3942
S100a14	-2.46716	6.17e-09	1.21e-06	8.49515	46.7492
Ctgf	-3.00014	6.4e-09	1.25e-06	3.33198	25.8918
Dclk1	-3.1281	8.52e-09	1.65e-06	49.391	463.22
Krt20	-3.47807	1.01e-08	1.92e-06	54.6912	614.334
Plaur	-2.0769	1.01e-08	1.92e-06	24.5275	103.946
Cldn7	-2.7088	1.1e-08	2.08e-06	14.2129	91.4699
Gm19817	-2.88087	1.11e-08	2.08e-06	3.563	27.5165
Ttbk1	2.24229	1.34e-08	2.5e-06	66.8268	13.8579
Bglap3	-3.13661	1.77e-08	3.28e-06	2.02595	21.5185
Ankrd63	2.91694	1.92e-08	3.51e-06	29.3675	3.10611
Bhlhe41	1.86984	1.92e-08	3.51e-06	162.998	44.0831
Pik3r5	-3.26839	1.95e-08	3.54e-06	12.951	123.996
Gm6762	3.52948	2.2e-08	3.97e-06	18.617	1.24728
Trim29	-3.19911	2.38e-08	4.27e-06	1.94657	19.4857
Spink4	3.23608	2.8e-08	4.98e-06	212.632	22.306
Pgc	5.26794	2.91e-08	5.15e-06	512.339	13.533
Rac2	-2.28337	3.48e-08	6.11e-06	10.8227	52.6475
Capn8	3.22265	3.97e-08	6.94e-06	196.14	20.6253
Slc41a2	2.15903	6.1e-08	1.06e-05	61.5344	12.9208
Lgr6	2.39224	7.27e-08	1.25e-05	46.0979	8.42778
Bok	-2.03495	7.46e-08	1.28e-05	17.0232	74.194
Ighg1	-4.78395	7.54e-08	1.28e-05	2.681	85.7943
ND3	-1.89067	8.18e-08	1.38e-05	29.8728	111.649
9530086O07Rik	-3.08336	9.05e-08	1.52e-05	1.57402	18.8637
Ncmap	-2.4424	1.01e-07	1.68e-05	6.3536	37.9656
Tlx3	2.55231	1.15e-07	1.9e-05	36.5503	6.06918
Nrxn2	2.20086	1.28e-07	2.11e-05	56.9904	12.2812
St6gal1	-2.09758	1.29e-07	2.11e-05	15.2064	63.0135
C530008M17Rik	2.84637	1.31e-07	2.13e-05	52.6084	6.78273
Gm12654	-3.53912	1.44e-07	2.33e-05	0	5.26426
Gm10036	2.97037	1.53e-07	2.46e-05	20.4516	2.50052
Cavin1	-2.11259	1.57e-07	2.51e-05	13.2728	59.2416
Fndc1	2.09855	1.71e-07	2.71e-05	66.3129	14.6624
Sult1c2	1.70025	1.99e-07	3.14e-05	265.712	80.4027
Gm572	2.92539	2.02e-07	3.17e-05	23.6151	2.84775
Ndrg2	2.82656	2.24e-07	3.49e-05	23.0737	3.13078
Epha2	-1.74021	2.35e-07	3.62e-05	56.5168	184.585
Gm10419	2.47145	2.35e-07	3.62e-05	37.5832	6.04957
B4galnt4	2.76374	2.6e-07	3.98e-05	26.4535	3.14404
Sftpd	-2.64885	3.43e-07	5.22e-05	2.84234	24.4359
Stk32b	2.4119	3.75e-07	5.67e-05	35.2958	6.28804
Trpm5	-3.0588	3.8e-07	5.72e-05	31.8969	287.687
Il1r1	-1.94015	4.14e-07	6.2e-05	19.1465	77.7121
Fmo5	2.04791	5.22e-07	7.74e-05	60.8853	14.5823
LOC105242401	-3.25511	5.25e-07	7.74e-05	0	4.21373
Lrit3	3.45218	5.26e-07	7.74e-05	12.1066	0.627036
Prcd	3.12833	5.35e-07	7.84e-05	17.8846	1.51494
Rgs13	-3.3802	5.46e-07	7.95e-05	6.01382	72.4279
S100a6	-1.63988	5.53e-07	8.01e-05	104.004	329.162
Arvcf	2.12979	5.85e-07	8.43e-05	55.185	12.1106
Ifi203	-2.45246	6.21e-07	8.89e-05	6.74086	38.9489
Vav1	-2.42259	6.49e-07	9.24e-05	5.33989	31.5928
Atg9b	-2.96567	6.53e-07	9.25e-05	22.9643	158.508
Ranbp1	1.79556	6.73e-07	9.49e-05	126.448	34.7959
Gabrp	-3.011	7.12e-07	9.98e-05	9.89883	77.3626
Spib	-2.91194	7.16e-07	9.99e-05	11.8703	96.7486
Strip2	-2.88153	7.3e-07	0.000101322	24.1748	170.884
Gm5814	2.56774	7.73e-07	0.00010665	28.3507	5.027
Tnfrsf8	-2.80161	8.15e-07	0.000111888	6.0074	44.5844
Gm9165	3.52061	8.65e-07	0.000118145	10.7147	0.38425
B4galnt3	1.97029	9.22e-07	0.000125292	68.229	17.1676
Pla2g2d	-2.5509	9.31e-07	0.000125766	3.76353	24.649
H2-Ob	-2.51509	9.46e-07	0.000127268	4.89351	26.7131
Osmr	-1.86835	9.69e-07	0.000129613	21.8815	85.6507
Muc3a	-2.54551	1e-06	0.00013339	27.6851	182.81
Rbm20	2.31005	1.1e-06	0.000145073	36.3628	6.64118
H6pd	-1.78569	1.12e-06	0.000147898	30.8019	108.056
Tmsb10	-2.02912	1.15e-06	0.000151344	14.2869	55.7623
Gm15270	-2.87752	1.17e-06	0.000152081	1.89544	16.3177
Cd209d	3.28175	1.18e-06	0.000153519	13.2151	0.785129
Col6a4	1.98978	1.35e-06	0.000173543	66.8142	16.6351
Plcg2	-1.85333	1.35e-06	0.000173543	22.3791	83.6094
Igkc	-3.23279	1.37e-06	0.000175603	0.757658	11.7273
Fn1	-2.46135	1.44e-06	0.000182535	24.3532	137.234
Gal3st2	-3.32902	1.44e-06	0.000182535	5.46564	58.7661
Spaca6	-1.86013	1.45e-06	0.000182535	22.0311	80.5866
Dnph1	3.34259	1.5e-06	0.000187932	11.2886	0.641728
Proz	2.97246	1.52e-06	0.000189462	26.8648	2.8632
Tspan12	-2.64195	1.62e-06	0.000201974	26.3675	180.275
Ugt1a7c	-2.17858	1.71e-06	0.000211632	10.7902	49.2117
Tpsab1	3.4264	1.73e-06	0.000212629	4.60353	0
Adamtsl2	2.22561	1.88e-06	0.000230175	41.0873	8.73043
Sptbn4	1.96595	1.93e-06	0.00023527	66.9034	16.5951
Akr1c19	2.50292	1.95e-06	0.000236841	26.6573	3.8429
Trim2	1.65234	2.32e-06	0.000280257	201.426	63.1306
A4gnt	4.97025	2.35e-06	0.000282542	42.0488	0.831377
Bcat2	1.88313	2.45e-06	0.000293076	73.7644	18.9484
Bicc1	-2.11935	2.53e-06	0.000301483	10.1477	41.68
Aplp2	-1.58168	2.55e-06	0.000302036	122.901	373.237
Sfn	-2.06794	2.56e-06	0.000302036	11.1878	45.7604
Gm20186	-2.36865	2.58e-06	0.000303869	5.10169	32.7417
Gm5522	3.35152	2.66e-06	0.000310774	5.00407	0
Muc4	-2.45206	2.66e-06	0.000310774	333.267	1845.94
C330013E15Rik	3.46606	2.7e-06	0.00031309	7.73324	0.21597
St6gal2	1.80567	2.72e-06	0.000314426	95.1279	27.5385
Kctd12	-2.65121	3.07e-06	0.000353357	23.8117	152.279
2010001K21Rik	3.31147	3.2e-06	0.000366757	4.81862	0
Gm26911	-3.02028	3.35e-06	0.000382463	1.02443	12.0958
P2ry2	-2.54223	3.39e-06	0.000385387	3.4672	20.9574
4930588G17Rik	3.43324	3.45e-06	0.000389711	7.7677	0.249253
Esp15	1.84654	3.51e-06	0.000395192	82.4275	22.5868
Nqo1	2.93224	3.76e-06	0.000421303	141.061	16.6661
Rad54b	2.28374	3.81e-06	0.000425341	34.6685	6.29383
Arhgap28	2.49542	3.97e-06	0.000438502	25.5541	3.95125
BC064078	3.21775	3.99e-06	0.000438502	9.53502	0.575666
Clic6	-1.84128	3.99e-06	0.000438502	25.8825	95.6868
Tle3	-1.62924	3.99e-06	0.000438502	62.6162	195.46
Gm12802	3.31691	4.32e-06	0.000472319	8.84575	0.332279
Casr	-2.30837	4.48e-06	0.00048756	5.72036	28.8362
Plet1	-2.34872	4.51e-06	0.000489391	4.51057	27.6805
Fyb	-2.62158	4.65e-06	0.000502743	22.2145	146.656
Adamts13	2.3841	4.71e-06	0.000507079	28.6957	4.75831
Nid2	2.61932	4.89e-06	0.000523393	20.5024	3.04561
Cd276	-2.04059	4.96e-06	0.000529248	10.0546	44.3269
Alox5	-2.60017	5.33e-06	0.000566787	17.9524	110.632
LOC102633880	-2.68878	5.37e-06	0.000567958	2.16613	16.6409
Ybx2	3.3602	5.4e-06	0.000569624	7.09536	0.21597
Bcas1	1.75757	5.52e-06	0.000579594	238.757	71.2087
Col16a1	2.35149	5.73e-06	0.000599398	26.0979	5.17005
Apobec3	-1.60028	5.89e-06	0.000613679	70.6817	221.129
Gatsl2	-1.83347	6.6e-06	0.000685039	23.9366	88.7089
Cyp21a1	-2.83168	7.09e-06	0.000729495	1.41136	12.0281
Nupr1	-2.38799	7.07e-06	0.000729495	23.0122	116.343
Itga2	-1.61915	7.69e-06	0.000789093	64.9752	209.071
Atp6v0d2	-2.60543	7.88e-06	0.000799734	25.7645	171.656
Ltbp3	-1.80416	7.89e-06	0.000799734	21.5857	75.7044
Tns4	-2.43634	7.85e-06	0.000799734	100.217	541.59
Capn9	4.23604	8.12e-06	0.000819693	34.2708	1.28335
Gprc5c	-2.15907	8.17e-06	0.000821571	17.0887	79.4267
Egln3	-2.42733	8.2e-06	0.000822098	3.6641	22.4783
Mcpt4	-2.43029	9.22e-06	0.000920894	3.98442	22.9926
Grp	3.0254	9.34e-06	0.000928896	3.50154	0
Akr1c12	2.07361	9.8e-06	0.000971338	39.5323	8.59712
Cmtr2	1.83078	1.07e-05	0.00105486	92.4706	25.6558
Slc6a6	-1.56288	1.08e-05	0.00106374	86.6631	257.049
Tmprss9	2.21223	1.11e-05	0.00108274	33.8694	7.0872
Sdk2	2.13819	1.14e-05	0.00110897	37.2558	8.2442
Tardbp	1.55358	1.17e-05	0.00113952	319.207	108.528
Ctrb1	-4.19613	1.23e-05	0.00119114	6.52235	152.336
Adh7	2.34806	1.27e-05	0.00122641	26.0673	4.69694
Sulf2	-2.0459	1.37e-05	0.00131338	82.699	349.493
Sh2d6	-2.75138	1.45e-05	0.00138575	14.2637	98.3732
Gm35392	2.56343	1.54e-05	0.00147077	18.8079	2.59773
Siglecg	-2.66489	1.56e-05	0.00148421	1.74153	14.4256
Chad	3.39992	1.62e-05	0.00153491	40.8815	3.67536
Fbxo34	1.90859	1.71e-05	0.00161927	53.3221	12.7778
Actg1	-1.51555	1.73e-05	0.00163027	136.254	394.216
Pirt	2.15789	1.75e-05	0.00164213	58.6043	13.169
Klf10	-1.69737	1.86e-05	0.00173988	26.8816	90.4498
Phldb2	-1.61368	1.93e-05	0.00180058	45.1969	141.198
Iglc3	-2.64193	1.94e-05	0.00180219	0	2.37573
Kcnk3	2.01751	1.96e-05	0.00180988	41.1659	9.99694
Pcdh19	2.18385	2.02e-05	0.00186608	32.3031	6.37817
Efemp1	-2.12601	2.04e-05	0.00186918	16.8611	76.8892
Gm9905	2.08105	2.12e-05	0.00194192	36.228	7.66569
A330001L22Rik	2.53108	2.13e-05	0.00194665	19.5496	3.22361
Gprc5a	-2.3611	2.23e-05	0.00203066	62.0008	312.479
Mafa	2.94956	2.29e-05	0.00207563	10.4564	0.854674
Kcnmb1	2.5955	2.36e-05	0.00212737	17.3684	2.40842
Slc9a3	2.36859	2.37e-05	0.00212891	23.6237	4.28255
Cngb1	2.11314	2.42e-05	0.00217196	34.3342	7.37186
Grem1	-2.48708	2.44e-05	0.00218157	2.96714	18.93
Dapk1	-1.76064	2.48e-05	0.00220426	20.1378	69.76
Myo7a	-1.84922	2.5e-05	0.00220964	15.1346	54.6584
Pdxk	-1.59414	2.5e-05	0.00220964	46.8037	145.462
Guca1a	2.71331	2.51e-05	0.00221071	14.3092	1.51644
Cd81	-1.91663	2.62e-05	0.00229203	70.1364	274.113
Slc17a7	2.0731	2.61e-05	0.00229203	37.8017	8.9742
Dbh	2.65283	2.72e-05	0.0023683	14.9665	1.97867
Upk3a	2.85876	2.72e-05	0.0023683	10.9919	0.969864
Gm17518	2.94709	2.93e-05	0.00254173	3.76803	0
Lmtk3	1.88299	2.99e-05	0.00257529	53.4754	13.7628
Tnn	2.68412	2.99e-05	0.00257529	13.236	1.68564
Tbx5	2.28618	3.03e-05	0.00260173	25.2109	4.58754
Ctsc	-1.60269	3.04e-05	0.00260302	42.4796	133.009
AW822252	3.02389	3.11e-05	0.00264746	6.8801	0.445378
Gda	-1.91939	3.11e-05	0.00264746	10.9145	44.3197
Cep85l	2.22937	3.13e-05	0.00265144	27.3464	5.28451
Cd19	-2.54293	3.23e-05	0.00273013	2.12934	13.5647
Prrt4	2.60186	3.27e-05	0.00275339	15.975	1.93537
Tff3	3.7945	3.33e-05	0.00279432	72.5895	4.39518
Gm16144	-2.38502	3.39e-05	0.00283917	3.29205	17.8611
D930020B18Rik	2.61891	3.56e-05	0.00295178	14.8364	2.51849
Egfr	-1.49915	3.54e-05	0.00295178	119.515	342.164
Gm7389	2.42444	3.56e-05	0.00295178	19.7185	3.49212
Prr7	2.28801	3.61e-05	0.00298545	24.7876	4.81137
Cgref1	1.97611	3.63e-05	0.00298867	39.0648	9.3645
Tmem236	-1.74696	3.71e-05	0.00304363	18.8035	67.2115
Wdhd1	1.85006	3.79e-05	0.00310342	55.0957	15.5759
Kbtbd13	2.94272	3.83e-05	0.00310678	8.51799	0.558649
Marcksl1	-2.03666	3.82e-05	0.00310678	7.81445	33.5933
Nkpd1	2.28121	3.83e-05	0.00310678	24.8763	4.90476
Egf	2.02009	3.95e-05	0.00318218	37.4341	8.60107
Tnfrsf12a	-2.08796	3.94e-05	0.00318218	7.17267	29.713
Gfi1b	-2.47373	3.99e-05	0.00320784	2.76334	15.6626
Cacna1b	1.80037	4.15e-05	0.00332694	60.9304	16.6133
Gm13429	2.93185	4.18e-05	0.00333581	8.75513	0.842929
1700001G17Rik	2.70259	4.32e-05	0.00338078	2.53944	0
Fthl17d	2.92459	4.32e-05	0.00338078	3.67567	0
Gm15691	2.86475	4.32e-05	0.00338078	9.78085	0.944579
Gm30517	2.85138	4.32e-05	0.00338078	3.29663	0
Nkx2-6	2.905	4.32e-05	0.00338078	3.56396	0
Rhcg	2.8507	4.32e-05	0.00338078	3.27088	0
Rhox9	2.87714	4.32e-05	0.00338078	3.3868	0
Syde2	2.21735	4.43e-05	0.00345536	26.2329	5.24426
Glt8d2	2.27457	4.56e-05	0.00354513	24.4407	4.33619
AW112010	-2.31728	4.7e-05	0.00364597	3.1327	19.4502
Cd300lf	-2.13892	4.76e-05	0.00368254	5.95646	25.7162
Gpr35	2.12601	4.91e-05	0.00376743	28.1385	5.63808
Hspa1b	-2.52457	4.91e-05	0.00376743	14.9309	88.6691
Tdrd6	2.49457	4.92e-05	0.00376743	16.9308	2.25871
Asz1	-2.10869	4.97e-05	0.00378391	5.57903	28.3228
Gm21859	2.84955	4.98e-05	0.00378391	9.85086	0.813401
Purg	2.73155	4.98e-05	0.00378391	12.0491	1.42551
Pnpla3	-2.14928	5.03e-05	0.00381031	5.70608	25.713
Cd44	-1.83383	5.19e-05	0.00391679	199.333	719.667
D630039A03Rik	1.93625	5.43e-05	0.00408736	39.2489	9.76601
Gnb1l	2.25824	5.5e-05	0.00412823	22.801	3.98035
Lmcd1	-2.64394	5.61e-05	0.00419002	1.54016	9.7084
Negr1	2.48259	5.6e-05	0.00419002	17.1673	2.45702
Lama1	2.24042	5.64e-05	0.00419629	24.661	4.28427
Mtor	1.48318	5.72e-05	0.00424322	376.706	133.819
Agap2	1.83422	5.78e-05	0.00426816	52.8614	15.0662
Gm10463	2.82612	5.78e-05	0.00426816	9.09441	0.652042
Plxnc1	1.8339	5.8e-05	0.00427183	55.2372	16.2917
Rragd	2.08163	5.86e-05	0.00429479	29.0125	6.46256
Tspan5	-1.78262	5.87e-05	0.00429479	15.4122	55.2838
Cpe	-2.02466	5.9e-05	0.00430792	7.72495	32.5123
Gm38941	2.93623	5.98e-05	0.00435104	5.15224	0.143281
Ccdc3	2.23443	6.08e-05	0.00439874	25.4114	4.65004
Gm19963	-2.59403	6.11e-05	0.00439874	0	2.50794
Masp2	1.64409	6.07e-05	0.00439874	98.125	31.8064
Trpm3	2.21038	6.11e-05	0.00439874	24.5997	4.65632
2410124H12Rik	2.68432	6.4e-05	0.00453684	2.56935	0
4930448A20Rik	2.74376	6.4e-05	0.00453684	2.88109	0
Gm20109	2.73352	6.4e-05	0.00453684	2.96793	0
Gna15	2.74393	6.4e-05	0.00453684	2.8867	0
Plxnb1	-1.84765	6.36e-05	0.00453684	12.4572	46.2537
Serpina5	2.82794	6.4e-05	0.00453684	3.2369	0
Hs3st3b1	1.79682	6.52e-05	0.00459767	53.897	14.7268
Stxbp5l	2.39976	6.51e-05	0.00459767	99.7345	18.561
Echdc2	-2.12997	6.66e-05	0.0046779	4.99045	24.7984
4930519G04Rik	2.61114	6.73e-05	0.00471575	13.5444	1.43348
Gapdh	-1.53955	6.75e-05	0.00471731	53.1899	158.585
Smok4a	2.89733	6.77e-05	0.00471979	6.31259	0.461844
Ttr	2.31075	6.98e-05	0.00485477	72.3901	14.5987
Agt	-2.29104	7.03e-05	0.00486654	3.92268	18.461
Rsph6a	2.90121	7.05e-05	0.00486654	6.69993	0.422485
Smpdl3b	2.89061	7.04e-05	0.00486654	4.66551	0.202157
Arhgap24	2.09219	7.15e-05	0.00492352	27.8404	6.29698
B430212C06Rik	2.23272	7.36e-05	0.00505075	23.2047	4.25616
Gm37053	-2.01644	7.41e-05	0.00505779	8.01718	31.9687
Zyg11a	2.78475	7.39e-05	0.00505779	8.88095	0.890014
Rbfox3	2.31357	7.54e-05	0.00513399	20.5024	3.83453
Tprg	-2.54719	7.63e-05	0.00517793	1.81189	11.5696
Zfp385b	1.8255	7.64e-05	0.00517793	48.4834	12.4857
Gm2651	1.77045	7.68e-05	0.00518901	59.5606	17.0137
Irx1	2.67432	7.78e-05	0.00524349	11.1688	1.28372
Slc16a2	-2.20047	7.8e-05	0.00524349	4.35677	21.3941
Serpinh1	-2.06938	7.83e-05	0.00525029	6.52373	28.7406
Osr2	2.882	7.86e-05	0.00525695	5.12625	0.24129
Tnfaip2	-1.96634	8.07e-05	0.00538225	9.08178	32.6944
Sema5a	-1.75096	8.1e-05	0.00539178	18.4791	58.9079
Rdh10	-1.56842	8.15e-05	0.00540901	56.5197	174.379
Akr1c13	1.94119	8.89e-05	0.0058856	35.9317	8.98923
Kcnip1	1.97203	9.1e-05	0.00598117	35.8383	7.94722
Pde8a	1.77592	9.09e-05	0.00598117	53.6167	15.0752
Pla2g10	2.15973	9.08e-05	0.00598117	23.3821	4.82864
Cyp2c68	2.74851	9.19e-05	0.00599914	8.47039	1.19645
Gm26995	2.00986	9.2e-05	0.00599914	32.3755	7.41001
Tchp	1.76227	9.17e-05	0.00599914	59.2175	16.0736
Cxcl5	-2.29232	9.3e-05	0.00605481	3.3666	17.4592
Synpo	1.79206	9.4e-05	0.00610316	52.0986	14.4052
Gm20642	2.6495	9.55e-05	0.00615214	2.65939	0
H2-M10.3	2.76719	9.55e-05	0.00615214	3.28969	0
Olfr982	2.67475	9.55e-05	0.00615214	2.71388	0
Tek	-2.17087	9.64e-05	0.00619485	5.17411	21.9667
Slc28a2	-2.5894	9.81e-05	0.00629301	1.06643	9.46109
Hoxc13	2.39461	9.88e-05	0.0063181	17.6941	2.79445
Foxg1	2.64332	9.93e-05	0.00633973	10.8515	1.15353
Grin2c	2.26687	0.00010117	0.00644068	20.6042	3.67171
Scn11a	2.5554	0.000101421	0.00644107	12.6572	1.57069
Rnase4	2.11873	0.000102044	0.00646508	133.649	30.3216
4930588K23Rik	2.51064	0.000102368	0.00647004	14.329	2.39018
Cpn1	2.12581	0.000104057	0.00656105	108.373	24.1966
Art1	2.78966	0.000104601	0.00657801	7.42401	0.49699
Cdc25b	2.0639	0.000105093	0.00657801	25.0456	6.25855
Nrg2	1.9371	0.000105305	0.00657801	38.2728	9.69271
TrnR	-2.61157	0.000105324	0.00657801	1.06409	8.96435
Gata2	2.24326	0.000105663	0.00658361	21.6463	3.97529
Ptprj	-1.52773	0.000106638	0.00662866	49.5806	149.457
Kifc5b	2.77841	0.000108107	0.00670414	7.19773	0.704279
Pou4f1	1.6321	0.000109717	0.00677214	92.5948	29.1358
Uncx	2.15043	0.000109477	0.00677214	24.6575	4.55909
Olfr393	-2.41716	0.000111213	0.00684843	0	2.03317
Gp1bb	2.20568	0.000113468	0.0069548	21.2421	4.39086
Lrp11	2.26617	0.000113262	0.0069548	18.6856	3.66099
Egr3	2.47085	0.000113846	0.00696178	14.7088	2.0549
Gm12339	2.77947	0.000114267	0.00697134	8.00899	0.957567
Pou3f3	2.06673	0.000115543	0.00703292	29.2704	7.02788
Ocstamp	2.76896	0.00012026	0.00730315	7.51152	0.526467
Creb3l4	2.17029	0.000122708	0.00743471	108.882	23.4351
Parp3	-1.8823	0.000125309	0.00757488	10.1023	37.6737
4930539E08Rik	-1.89516	0.000126522	0.0076307	8.70693	34.7283
Atp5k	1.65193	0.000127827	0.00769181	79.2138	23.6184
Tnc	-1.9334	0.000128431	0.00771055	9.57105	35.8372
Cd209c	2.70906	0.000129186	0.00773824	8.62448	0.760079
Guca1b	2.17637	0.000132904	0.00794288	23.4174	4.99819
Plch2	1.83913	0.000138101	0.00823479	41.7249	11.2664
Cldn5	2.44217	0.000141578	0.00836709	13.4309	1.68439
Csnk2a1-ps	2.7255	0.000143494	0.00836709	3.16826	0
D630023F18Rik	2.65913	0.000143494	0.00836709	2.76322	0
Gm26688	2.61606	0.000143494	0.00836709	2.7103	0
Gm27321	2.64978	0.000143494	0.00836709	2.83201	0
Gm6580	2.65161	0.000143494	0.00836709	2.79985	0
Gm7190	2.72469	0.000143494	0.00836709	3.11041	0
Gm8797	1.97987	0.000142923	0.00836709	32.5828	7.59401
Marcksl1-ps4	2.62444	0.000143494	0.00836709	2.58754	0
Pank1	2.09958	0.000143165	0.00836709	23.941	5.44534
Hes7	2.29493	0.000144357	0.00839882	18.7787	3.67246
Btbd11	-1.82729	0.000145109	0.00840547	10.9159	41.356
Stom	-1.63816	0.000144934	0.00840547	22.1799	74.1251
Asb13	1.60956	0.000148396	0.00857423	87.3609	27.7814
Cdx1	2.63858	0.000148673	0.00857423	9.44547	0.955405
Sybu	2.1953	0.000153892	0.00885583	20.3726	4.35701
4930533I22Rik	-2.49181	0.000161962	0.00929992	0.121013	3.13631
Mymk	2.75234	0.000162899	0.0093334	5.64703	0.32302
4933402E13Rik	2.72705	0.000163958	0.00937372	4.56926	0.378849
Barhl2	2.61839	0.000167926	0.0095798	9.31745	1.16055
Adgrb1	2.19418	0.000168617	0.0095984	20.9435	4.3156
Serpinf2	2.38326	0.000175098	0.00994589	14.1772	2.11968
1700019D03Rik	2.56163	0.000177276	0.0100321	9.65809	1.06543
Col6a5	1.74798	0.000177378	0.0100321	54.2617	15.2685
Fam213a	-1.61172	0.00017807	0.0100497	24.242	77.7233
2310015D24Rik	2.66061	0.000181335	0.0102121	8.46647	0.673384
Cel	-3.26999	0.000184071	0.0103282	3.87853	44.8983
Fbln7	2.40906	0.000184255	0.0103282	13.6378	2.03397
Lingo3	1.93179	0.000184572	0.0103282	34.6901	8.70147
TrnK	-2.56056	0.000187404	0.0104644	0.614825	7.10123
Frs3	2.16377	0.000188996	0.0104961	22.0899	4.80745
Vax2os	2.09023	0.0001888	0.0104961	24.6295	5.9169
Wnt1	2.64747	0.000189166	0.0104961	8.23318	0.93388
Fam131a	2.2736	0.000191898	0.0106101	17.3279	2.76008
Gm10655	2.73115	0.000192026	0.0106101	5.94627	0.438572
Reg3b	-2.74063	0.000197523	0.010891	11.7373	86.1366
Mgat5b	2.12676	0.000200275	0.0110197	22.7811	4.66378
Fgfr2	1.93262	0.000202229	0.0111041	145.162	39.9031
Iglv1	-2.55971	0.000202877	0.0111165	0.599296	4.89128
Tssc4	-1.71862	0.000204281	0.0111702	16.058	52.6921
Gm13377	2.5918	0.000204991	0.0111858	9.13982	1.01068
4930403D09Rik	-2.31618	0.000207588	0.0112115	0	1.90605
Haao	-2.45739	0.000207588	0.0112115	0	2.54454
Igkv9-119	-2.33678	0.000207588	0.0112115	0	2.10068
Scn3b	1.98821	0.000206563	0.0112115	29.5249	6.20219
Tcp10c	2.70657	0.000206468	0.0112115	5.5611	0.345117
Cd53	-2.4648	0.000209023	0.0112659	1.11967	9.94469
4930519A11Rik	2.54897	0.000217918	0.0113879	2.44776	0
Akp-ps1	2.52305	0.000217918	0.0113879	2.38816	0
Dchs2	1.78404	0.000218254	0.0113879	47.5474	13.4606
Fscn3	2.58955	0.000217918	0.0113879	2.73333	0
Gata1	2.49321	0.000217918	0.0113879	2.22156	0
Gja4	2.48394	0.000217918	0.0113879	2.22036	0
Gm14858	2.6656	0.000216046	0.0113879	4.19485	0.202157
Gm15958	2.70247	0.000217918	0.0113879	3.24429	0
Lmod2	2.52618	0.000217918	0.0113879	2.49086	0
LOC102641351	2.48111	0.000217918	0.0113879	2.26774	0
Olfr155	2.63538	0.000217918	0.0113879	3.04447	0
Paqr6	2.54256	0.000217918	0.0113879	2.54043	0
Pinlyp	2.50558	0.000217918	0.0113879	2.49173	0
Shisa7	2.0205	0.000213127	0.0113879	27.5108	6.54629
Syce3	2.50711	0.000217918	0.0113879	2.42062	0
Tmem136	2.63147	0.000216051	0.0113879	8.18472	0.770021
Tnfsfm13	2.66243	0.000218632	0.0113879	4.15069	0.202157
Irx3	2.4969	0.00022791	0.0118477	11.598	1.5948
Gm10052	2.30568	0.000230401	0.0119537	15.891	2.32462
Foxf1	2.20876	0.000232586	0.0120015	19.0474	3.43827
Fut9	-1.72453	0.000232689	0.0120015	16.1013	52.3472
Kcnj14	2.24857	0.000232362	0.0120015	17.6275	3.35505
Cep85	-1.77065	0.000235691	0.0121325	12.2587	41.4284
Gjb4	-2.37734	0.000237547	0.0122043	2.14048	11.0594
Btla	-2.47257	0.000238279	0.012218	1.19217	9.56172
Pycr2	-1.90831	0.000243902	0.0124821	8.22851	31.6923
Rhpn1	2.64876	0.000244391	0.0124829	4.20283	0.190585
Urah	-1.93027	0.000245512	0.0125159	6.84615	28.0862
Eomes	2.01786	0.000247167	0.0125759	26.9089	6.46148
Itga4	-1.73241	0.000249734	0.0126821	14.669	53.2709
Hbegf	-1.68644	0.000253813	0.0128644	16.9688	56.263
Smoc1	1.62909	0.000254525	0.0128757	68.8883	22.052
Ildr1	-1.77264	0.000257298	0.0129911	11.4463	41.4173
Col18a1	-1.91522	0.000262219	0.0131886	53.7259	198.336
Dio1	-2.44907	0.000262712	0.0131886	1.29378	8.65111
Slc6a21	2.63112	0.000261784	0.0131886	6.54934	0.587903
Cygb	2.09038	0.000263461	0.0132011	23.3128	4.87133
Dmrt3	2.05202	0.000268455	0.0134258	24.858	5.5685
Cspg5	1.81231	0.000271583	0.0135565	39.8458	10.8734
Asb16	2.46268	0.000272709	0.013587	10.5591	1.38607
Car9	-1.52066	0.000274885	0.0136696	51.7094	151.64
Arhgdib	-2.3388	0.00027752	0.0137746	1.95486	11.4436
Lcn2	-2.69867	0.000283106	0.0140255	4.5711	27.7887
Sprr2a3	-2.05346	0.000283907	0.0140388	4.32083	20.3314
Pnpla5	2.64314	0.000285508	0.0140915	5.46168	0.32431
Hspbap1	1.79513	0.000287004	0.0141389	40.7901	10.6574
Gm14379	2.64765	0.000288193	0.0141709	5.72261	0.547979
Itgb6	-1.42282	0.000293085	0.0143846	112.745	306.585
Xkr7	2.26995	0.000293922	0.0143989	15.7388	2.78364
Fcgr1	2.58333	0.00029631	0.0144352	3.69407	0.202157
Gm8909	2.58443	0.000296853	0.0144352	3.92203	0.192873
Kcp	2.35149	0.000295596	0.0144352	13.8631	2.48135
Wnt11	1.88586	0.000296497	0.0144352	33.6235	8.62888
Mdga1	1.50226	0.00029957	0.0145327	135.26	46.4297
Zfp202	1.84717	0.000299962	0.0145327	36.8206	10.0305
Prss22	-2.17867	0.000301995	0.0146044	3.27249	16.4783
Tmem173	-2.01757	0.000302857	0.0146192	5.78138	21.6476
Fbln1	2.13472	0.000304755	0.0146839	19.6559	4.02838
Ptprc	-1.63098	0.000306281	0.0147306	21.8279	69.7391
Hpgd	1.59022	0.000307462	0.0147604	185.191	59.8827
Try5	-4.74626	0.000308576	0.0147869	0	11.8381
Dlx5	2.62224	0.000314429	0.0150401	5.20665	0.497007
Gm20257	-2.4886	0.000321434	0.0153473	0.544151	5.95389
Ntn4	1.52376	0.000324037	0.0154436	106.06	36.741
Slc38a5	2.5549	0.000325913	0.015505	3.64866	0.18992
Hrk	2.16961	0.000327954	0.015574	19.1378	3.68687
1700007L15Rik	2.31975	0.00033532	0.0155868	1.86177	0
1810059C17Rik	2.48772	0.00033532	0.0155868	2.52355	0
4921513H07Rik	2.4012	0.00033532	0.0155868	2.04963	0
4930432H08Rik	2.48727	0.00033532	0.0155868	2.53181	0
Aldoart2	2.45691	0.00033532	0.0155868	2.37961	0
AY512931	2.4879	0.00033532	0.0155868	2.55489	0
Gm15407	2.53154	0.00033532	0.0155868	2.64911	0
Mesp1	2.39456	0.00033532	0.0155868	2.16689	0
Olfr718-ps1	2.61156	0.00033532	0.0155868	3.10152	0
Scarna13	2.45321	0.00033532	0.0155868	2.49141	0
Tbx1	1.8515	0.000331028	0.0155868	33.9877	9.20009
Tmem56	1.61631	0.000331453	0.0155868	68.7364	22.3326
Fcna	-2.31863	0.000336778	0.015627	1.78003	10.9083
En2	2.43999	0.000337863	0.0156498	11.0746	1.54257
Lao1	2.58824	0.000345172	0.0159458	3.98683	0.192873
Lhx5	2.40424	0.000345666	0.0159458	12.1958	1.66458
Tnfsf9	-2.31756	0.00034607	0.0159458	1.86166	11.2009
Cd177	2.50037	0.00034872	0.0160399	7.82028	1.0388
Hist1h1a	2.52593	0.000356249	0.0163577	3.42358	0.190585
1700030F18Rik	1.97566	0.000358711	0.0163991	27.3496	6.56506
Adh1	-2.17516	0.000359017	0.0163991	34.763	169.299
Ptprb	1.89289	0.000358268	0.0163991	31.0824	8.43538
Gata3	-1.86369	0.00036178	0.0164967	8.48683	31.2635
Runx2os2	-2.413	0.000365731	0.016648	0.327087	3.75252
Gm11992	2.38903	0.000366546	0.0166564	10.7497	1.40793
4933408J17Rik	2.38661	0.000371817	0.0168668	11.4398	1.90022
Cd74	-2.18843	0.000378236	0.0171039	31.6258	152.728
Hhipl1	2.45818	0.000378341	0.0171039	9.67003	1.3837
Muc2	2.08844	0.000384698	0.0173615	19.588	4.60518
Nkx2-1	2.41835	0.000387366	0.017452	10.6463	1.53903
Psg17	-2.46418	0.000392096	0.0176349	0.554339	5.4409
Btnl5-ps	1.97286	0.000393151	0.0176495	24.6657	6.77998
S100a10	-1.63552	0.000393758	0.0176495	17.3708	57.4705
Vmn1r-ps22	-2.2427	0.000399737	0.0178567	0	1.94385
Vmn1r-ps52	-2.2631	0.000399737	0.0178567	0	2.00645
Ryr1	1.80139	0.000401732	0.0179057	39.3492	10.6245
Trpc7	2.48636	0.000402191	0.0179057	8.51036	1.283
Socs1	2.53394	0.000407114	0.0180943	8.19141	0.949362
Elfn2	2.23666	0.000413963	0.0183677	14.9554	2.39267
Foxo6os	-2.40872	0.000414981	0.0183819	0.957983	7.64051
Reg2	-2.424	0.000416975	0.0184393	0.764435	4.61896
Asb18	2.55898	0.000420373	0.0185584	6.76187	0.621819
Gm11514	2.44522	0.00042563	0.018759	9.72683	1.43943
Atoh7	2.55326	0.00042849	0.0188536	6.49054	0.625861
Cd52	-2.30819	0.000433431	0.0190392	1.93053	10.7471
Arhgap36	1.96959	0.000441047	0.0193097	25.5731	6.06955
Olfr747	-2.37732	0.000441055	0.0193097	0.263307	3.2354
Emp1	-1.86595	0.000450708	0.0196996	152.532	564.589
Drd4	2.50757	0.00045374	0.0197993	7.12037	0.617766
Ssc5d	2.17027	0.000456355	0.0198805	16.4022	3.46388
Ptpn5	2.06492	0.000458594	0.0199451	21.137	4.61188
Asic1	2.29208	0.000466977	0.0202429	12.5063	2.3009
Tmem28	2.09404	0.000466222	0.0202429	19.4873	4.23246
Ube2t	1.83442	0.000467791	0.0202448	33.0878	9.61329
AI506816	-1.99796	0.000476863	0.0206036	4.34399	20.1947
Hoxd9	2.53289	0.000478723	0.0206164	6.58176	0.762331
Sox1	2.23952	0.000478526	0.0206164	14.8943	2.67285
Gm11525	2.4613	0.00048803	0.0209147	3.49207	0.151185
Hgd	2.56629	0.00048803	0.0209147	4.46238	0.249253
Zyx	-1.45188	0.000487251	0.0209147	58.4026	158.47
Abcc6	2.3488	0.000497342	0.0212564	11.196	1.83198
Dgat2l6	2.52425	0.000497617	0.0212564	6.06352	0.479435
Top2a	1.76815	0.000501045	0.0213682	34.3974	10.7974
Slc26a9	-1.84627	0.000508666	0.0216582	111.375	406.577
Gimap3	-2.36652	0.000516178	0.0219426	0.918465	8.65212
4930517O19Rik	2.44838	0.000524481	0.0219765	2.45604	0
BC022960	2.34631	0.000524481	0.0219765	2.11358	0
Cd59b	2.41927	0.000520311	0.0219765	3.11279	0.151185
Gdf2	2.37197	0.000524481	0.0219765	2.2049	0
Gm16283	2.42891	0.000524481	0.0219765	2.48732	0
Gm8310	2.2647	0.000524481	0.0219765	1.94836	0
Mageb8-ps	2.2209	0.000524481	0.0219765	1.73559	0
Olfr116	2.35257	0.000524481	0.0219765	2.054	0
Snhg7os	2.30746	0.000524481	0.0219765	2.02635	0
Gcnt1	-1.79781	0.00052745	0.0220658	9.24919	33.4262
Pitx2	2.43954	0.000530193	0.0221454	7.96578	1.00058
Cxcr5	-2.26071	0.000532042	0.0221875	2.18766	11.7819
Pou2f3	-2.19	0.000539364	0.0224573	10.5286	51.1888
Stk25	-1.39189	0.000542226	0.0225408	131.188	347.129
3830417A13Rik	2.51086	0.000545984	0.0226614	5.03396	0.490543
LOC108168035	2.40279	0.000550303	0.0228047	9.4698	1.52705
Zfp41	2.31931	0.000565608	0.0234021	9.762	1.45159
BB031773	2.26161	0.000576648	0.0238215	12.0958	2.15498
Gm26740	-2.31121	0.000578382	0.0238558	0.408568	3.48313
Gm19719	-1.94162	0.000579752	0.0238749	5.35733	22.2132
Hoxc9	2.15393	0.000584246	0.0240224	16.1961	2.7292
Nlrp6	2.1901	0.000587534	0.02412	14.6222	2.50896
Lhx1os	2.27189	0.000593162	0.0243132	12.6759	1.91982
Fbxl15	2.38417	0.000597597	0.0244569	8.32142	0.982974
Cd79b	-2.23032	0.000601469	0.0245772	2.61055	13.2352
Arhgap22	2.38071	0.000618734	0.0251228	8.74679	1.15827
Gm43568	2.48879	0.000618766	0.0251228	5.23466	0.442126
Hoxa11os	2.48763	0.000617044	0.0251228	5.88508	0.475471
Mfsd7a	2.28503	0.000619586	0.0251228	11.6227	1.94939
Vwa5b2	1.70917	0.000617005	0.0251228	44.5355	12.8443
Shank3	1.74156	0.000624692	0.0252909	40.7358	11.3513
Gm31135	2.49399	0.000627332	0.025335	6.5416	0.537817
Vax2	2.45426	0.000627702	0.025335	7.19385	0.683216
Ndrg4	2.03192	0.000629818	0.0253815	20.3996	4.3866
Trim72	2.48304	0.000634471	0.0255299	4.91286	0.294145
2021-03-09	1.6805	0.00065224	0.0260857	47.5071	14.4233
Cfi	1.91792	0.0006517	0.0260857	117.208	30.4502
Pnliprp1	-3.17343	0.000651741	0.0260857	3.47264	35.8899
Rtl9	2.46775	0.000650343	0.0260857	4.65654	0.3326
Shh	1.38653	0.000657399	0.0262521	385.723	146.428
Atp10a	-1.85612	0.000659127	0.0262813	7.95996	26.1403
Prdm12	2.4656	0.000673271	0.0268047	4.8368	0.38425
Kif2c	2.32718	0.000683213	0.0271595	9.5656	1.61994
2900072N19Rik	2.41693	0.00069097	0.0272216	3.54744	0.255458
B930082K07Rik	2.40717	0.00069097	0.0272216	3.34073	0.189319
BC028528	2.42907	0.00069097	0.0272216	3.42521	0.220328
Gm15645	2.4343	0.00069097	0.0272216	3.55649	0.202157
Tex24	2.4167	0.00069097	0.0272216	3.51117	0.24129
Twist1	2.47417	0.00069097	0.0272216	3.75695	0.190609
Ctla2a	-2.27774	0.000705034	0.0277341	1.61633	8.40553
Gm16287	2.26759	0.000712794	0.0279976	11.4935	2.01287
Camk2n2	2.04365	0.000715059	0.0280448	19.2953	4.87131
Cd80	-2.33474	0.000718054	0.0281204	0.685152	4.71746
Socs2	1.62527	0.000721614	0.0282179	52.7583	16.3929
Lrfn1	2.02132	0.000724903	0.0283045	20.2727	4.27278
She	2.20972	0.000727701	0.0283717	12.8874	2.29123
H2-DMb2	-2.29124	0.000741978	0.0288856	1.36077	9.60356
Gm13398	2.31115	0.000750548	0.0291762	9.34284	1.69567
Cyp2b10	2.43329	0.000752403	0.0292052	5.31353	0.591292
Gm16553	-2.33467	0.000764071	0.029571	0.77051	5.62299
Muc13	-1.8311	0.000763775	0.029571	6.87821	25.596
Adgrl4	1.93572	0.000772539	0.0298431	23.3074	5.91858
Junb	-1.46521	0.000776764	0.0298431	41.0774	113.445
Pls3	-1.42304	0.000775265	0.0298431	59.1431	162.998
Spata18	2.438	0.000774631	0.0298431	4.76252	0.530034
Tulp1	1.99571	0.000776599	0.0298431	19.8014	4.21744
Nrxn3	1.77069	0.000778038	0.0298486	35.0137	10.077
Nat8l	2.28344	0.000782073	0.0299598	9.91206	1.31639
Olfr734	2.44066	0.000785549	0.0300492	6.01781	0.653567
Chrd	1.82853	0.000796116	0.03028	30.1487	8.08115
Gm12387	-2.21412	0.000798478	0.03028	0	2.11145
Gm18641	-2.14083	0.000798478	0.03028	0	1.76323
Gm21917	2.43521	0.000799625	0.03028	5.04823	0.634308
Igkj2	-2.12848	0.000798478	0.03028	0	1.85113
LOC102635863	-2.08901	0.000798478	0.03028	0	1.56629
Vmn1r-ps106	-2.08806	0.000798478	0.03028	0	1.65655
1700028E10Rik	2.24129	0.000827437	0.0307587	10.6483	1.7184
1700063D05Rik	2.26373	0.000836774	0.0307587	1.97192	0
4930433B08Rik	2.23625	0.000836774	0.0307587	1.87055	0
A830009L08Rik	2.27046	0.000836774	0.0307587	1.94538	0
AI467606	-2.24572	0.000818006	0.0307587	1.65068	7.98963
Ccdc88c	-1.56635	0.000816826	0.0307587	20.6616	61.8077
Gm11528	2.39979	0.000836774	0.0307587	2.54586	0
Gm15383	2.31159	0.000836774	0.0307587	2.16289	0
Gm15528	2.19792	0.000836774	0.0307587	1.77857	0
Gm27166	2.31706	0.000836774	0.0307587	2.18295	0
Gm8604	2.28156	0.000836774	0.0307587	2.09403	0
Gm8879	2.33086	0.000836774	0.0307587	2.22657	0
Hist1h3g	2.10848	0.000836774	0.0307587	1.47356	0
Nav1	-1.52205	0.000824641	0.0307587	27.6985	77.5296
Olfr1361	2.22809	0.000836774	0.0307587	1.87773	0
Olfr750	2.25081	0.000836774	0.0307587	1.93868	0
Pced1c-ps	2.20915	0.000836774	0.0307587	1.80203	0
Pdzrn3	-1.69266	0.000824944	0.0307587	13.1902	41.2217
Rplp0-ps1	-2.26456	0.000825194	0.0307587	1.76361	9.18883
Serpina4-ps1	2.19996	0.000836774	0.0307587	1.81554	0
Slc12a3	2.41678	0.000822368	0.0307587	4.68729	0.595075
Ghrl	3.54216	0.000859549	0.0315519	35.9125	2.55576
Spry4	-1.74173	0.000863128	0.0316392	10.6135	34.5842
Fam131b	2.42133	0.000864338	0.0316396	5.01247	0.436458
Msx1	2.18279	0.000873144	0.0319176	12.6948	2.29626
Pkdcc	1.69752	0.000875414	0.0319563	41.4733	11.6844
Gm13204	2.08944	0.000890278	0.0324476	15.407	3.39279
Gm14025	2.11811	0.000891336	0.0324476	14.5018	2.61142
Npffr1	2.21259	0.000902223	0.0327986	12.208	1.98587
Themis3	-1.85095	0.000905913	0.0328874	6.11049	23.7969
Cacna1g	1.91934	0.000925838	0.0335645	22.4648	5.61115
Gm3764	2.35353	0.000930969	0.0337041	7.83479	0.954311
Dnah1	2.07001	0.000932397	0.0337095	16.0111	3.3288
Unc93b1	-1.74189	0.00093506	0.0337595	9.50325	33.6424
A730013G03Rik	2.2925	0.00094285	0.0339942	10.1931	1.52386
Cilp2	2.25932	0.00094615	0.0340101	11.0725	1.97894
Crhbp	2.37667	0.000947162	0.0340101	7.05334	1.03972
Umodl1	2.04991	0.000946339	0.0340101	16.6593	3.5126
Gsx1	2.29151	0.000952384	0.0341511	9.90151	1.37787
Itgb8	-1.72976	0.000959817	0.0343242	9.98175	33.3337
S100a11	-1.39219	0.000959011	0.0343242	185.395	493.681
Bend4	1.87343	0.000969346	0.034618	26.2811	6.73121
6430584L05Rik	2.33634	0.000980076	0.0346723	3.09627	0.143281
Arr3	2.46113	0.000980076	0.0346723	3.93824	0.21597
Cstad	2.35361	0.000980076	0.0346723	3.41389	0.255458
Gm5320	2.32931	0.000980076	0.0346723	3.20472	0.24129
Gm9234	2.31787	0.000980076	0.0346723	3.25394	0.21597
Ppargc1b	1.55165	0.000977801	0.0346723	64.7793	21.0502
Slc25a43	2.30141	0.000980076	0.0346723	3.03445	0.378849
Isl2	2.34093	0.000982219	0.0347016	7.3076	0.878404
Gm7420	-2.20039	0.000987073	0.0348264	0.292429	3.43151
Foxf2	1.91387	0.000992125	0.0348646	22.9489	5.59296
Rspo3	2.39587	0.000991482	0.0348646	5.75546	0.50657
Rtn4rl2	2.38489	0.000990878	0.0348646	4.6575	0.439838
Pyy	-2.90109	0.00100011	0.0350983	25.7491	179.86
Gm17359	2.31014	0.00100678	0.0352855	8.58408	1.1312
Ier5l	1.6977	0.00101102	0.0353789	40.6603	12.2094
Tmem229a	-1.87914	0.00101213	0.0353789	5.72267	21.846
Atp7b	1.5388	0.00101455	0.0354164	91.5463	30.3313
Trim61	2.24306	0.00102279	0.0356568	2.87347	0.192873
Ctla2b	-2.18902	0.00102489	0.0356829	0.330887	3.27126
Insm1	1.87303	0.00103548	0.036004	24.9192	6.45372
2021-03-04	-1.81464	0.00104195	0.0361814	7.60032	26.8205
Kcnip3	2.3594	0.001051	0.0364475	6.88109	0.824349
Hist1h2bl	2.22576	0.00106881	0.0370164	2.63239	0.190585
Zfp296	2.09282	0.00107669	0.0372406	15.0484	2.94133
Enpp2	2.31963	0.00107836	0.0372495	7.34249	1.23511
Inpp5j	-1.63167	0.00110322	0.0380583	13.7585	44.4094
Slc18a1	-1.97529	0.00110734	0.0381504	3.76983	17.0508
Gm11545	-2.26204	0.00111918	0.0384578	0.519943	5.02001
Hydin	1.83107	0.00111782	0.0384578	27.5	7.22831
Ano1	-1.36928	0.00113568	0.0389378	102.408	269.672
Scrt1	2.10527	0.0011361	0.0389378	14.2659	2.80849
Lrrc52	2.25729	0.00115548	0.0395504	9.8312	1.64004
Loxhd1	2.19489	0.00116758	0.0399129	10.5858	1.67123
Tex15	1.67265	0.00117607	0.0401509	40.7088	13.1045
Kif4	2.11126	0.00118245	0.0403165	13.1627	2.96135
Lepr	-2.04743	0.0011851	0.0403547	11.5302	47.4309
Tpbgl	2.24512	0.00118764	0.0403888	9.48015	1.86247
S100a16	-1.48543	0.0011926	0.0405054	29.4331	83.0232
Plk2	-1.64581	0.00121265	0.0411333	13.0036	39.2043
Prickle4	2.34941	0.0012366	0.0418919	5.67096	0.526442
Tubb5	-1.37357	0.00124541	0.0421362	108.447	286.643
Rab27b	1.36891	0.00124804	0.0421711	267.913	103.316
Porcn	-1.70202	0.00125179	0.0422433	78.4763	261.244
Exosc10	1.39462	0.00125497	0.0422965	187.893	70.373
Bbip1	1.54722	0.00126362	0.0425339	58.1167	20.3608
Cbln1	2.18578	0.00128149	0.0430804	11.3176	1.836
Hcrtr1	2.34009	0.00128372	0.0431004	5.64772	0.661863
Cdhr5	-1.74838	0.00131601	0.0441282	8.7912	28.3155
Kirrel	1.63204	0.00132256	0.0442916	45.5797	14.1532
1700022A21Rik	2.34315	0.00139347	0.0443555	3.46868	0.245874
4930458A03Rik	2.18363	0.00139347	0.0443555	2.76169	0.378849
4930465M20Rik	2.13141	0.00136628	0.0443555	1.71115	0
4930483O08Rik	2.14092	0.00136628	0.0443555	1.72071	0
4930571K23Rik	2.346	0.00139347	0.0443555	3.35862	0.190609
5330411O13Rik	2.11698	0.00136628	0.0443555	1.71097	0
Alpi	2.28674	0.00134125	0.0443555	91.4222	18.7643
BC048671	2.21762	0.00139347	0.0443555	2.79928	0.345822
Calhm3	2.28709	0.00139347	0.0443555	3.09451	0.249253
Cdkn2b	-1.54282	0.00137595	0.0443555	19.7064	57.8112
Fmod	2.30863	0.00136691	0.0443555	4.31195	0.406579
Gm11608	2.12557	0.00136628	0.0443555	1.72293	0
Gm12159	2.1962	0.00136628	0.0443555	2.0564	0
Gm13197	2.19634	0.00139347	0.0443555	2.62932	0.151185
Gm14710	2.15685	0.00136628	0.0443555	1.88587	0
Gm15897	2.17208	0.00136628	0.0443555	1.85457	0
Gm16130	2.32309	0.00139347	0.0443555	3.30396	0.202157
Gm28175	2.13447	0.00136628	0.0443555	1.7172	0
Gm36858	2.10565	0.00136628	0.0443555	1.66949	0
Gm39033	2.22043	0.00136628	0.0443555	2.03358	0
Gm5127	2.20744	0.00136628	0.0443555	1.94682	0
Gm5893	2.31658	0.00139347	0.0443555	3.22668	0.151185
Gm6116	2.1772	0.00136628	0.0443555	1.92232	0
Gm7292	2.06954	0.00133365	0.0443555	12.4089	2.68789
H2-Eb1	-1.81462	0.00137998	0.0443555	6.26427	24.0127
Lrrc10	2.18275	0.00136628	0.0443555	1.84892	0
Mboat4	2.35384	0.00139347	0.0443555	3.51859	0.192873
Mc3r	2.17551	0.00136628	0.0443555	1.89426	0
Ninj2	2.08022	0.00136628	0.0443555	1.54691	0
Nt5dc2	2.18312	0.00136628	0.0443555	1.96685	0
Olfr1257	2.20414	0.00136628	0.0443555	1.9469	0
Olfr645	2.22088	0.00136628	0.0443555	2.01679	0
Olfr985	2.19199	0.00139347	0.0443555	2.66827	0.24129
Pitx1	2.11841	0.00139314	0.0443555	12.1412	2.38118
Prg3	2.3083	0.00136628	0.0443555	2.46046	0
Rpl23a-ps1	2.06698	0.00136628	0.0443555	1.49772	0
Selenov	2.28315	0.00139347	0.0443555	3.18	0.202157
Slc12a5	1.85326	0.00137425	0.0443555	25.0338	5.9713
Tex44	2.23896	0.00139347	0.0443555	2.75264	0.18992
Tspan10	2.09546	0.00136628	0.0443555	1.63874	0
Wnt9b	2.33044	0.00133599	0.0443555	5.50857	0.51423
Vamp5	-1.89858	0.00140394	0.0446348	4.26183	18.8368
Htr4	2.14058	0.00141138	0.04481	11.1028	2.25661
Txndc5	1.3785	0.00141285	0.04481	205.139	77.9004
F2	2.27624	0.00142137	0.0449464	7.54361	1.12413
Glra1	2.30289	0.00142227	0.0449464	6.69237	0.811376
Gm12846	-2.21337	0.00142147	0.0449464	0.78933	5.06784
Tubb2b	-2.16821	0.00143828	0.0453978	1.27222	7.63015
Artn	2.16302	0.00145631	0.0458582	11.2725	2.08403
Cit	1.70663	0.00145749	0.0458582	35.3423	10.3522
Ecel1	2.06377	0.00145808	0.0458582	13.034	3.02939
Plet1os	-2.12219	0.00146356	0.0459757	1.4516	8.99526
Prss16	2.29993	0.00147503	0.0462809	5.05469	0.702314
Hck	-1.99947	0.00148575	0.0465618	12.7106	53.0584
D730003I15Rik	2.21393	0.0015109	0.0471854	9.31892	1.50452
Gm15672	2.09336	0.00151045	0.0471854	13.045	2.30488
Irx5	2.12328	0.00151102	0.0471854	11.564	2.78774
Gsap	-1.60609	0.00151479	0.0472472	15.5533	45.0248
Gdf7	2.35559	0.0015247	0.0473881	4.76349	0.363289
Kcnd3os	2.31747	0.0015247	0.0473881	4.40986	0.344058
Plxna3	1.42823	0.0015221	0.0473881	118.506	43.1234
Baat	2.28882	0.00153837	0.0477566	4.96767	0.624244
BC035947	2.20032	0.00154915	0.0480345	8.77839	1.60148
Palmd	-1.51846	0.00156698	0.0484915	22.1907	62.0345
Teddm3	1.69347	0.00156757	0.0484915	31.5183	8.90854
Cd37	-1.91928	0.00156988	0.048506	4.61236	18.8651
Cd14	-1.87214	0.00157201	0.0485152	17.6055	71.3479
Gzmm	2.17578	0.00157489	0.0485471	10.0018	1.73209
Gm4969	2.24968	0.00158376	0.0487635	7.03234	1.10414
Gm12648	-2.18912	0.00159959	0.049136	0.816362	5.0534
Sectm1b	2.09874	0.00159838	0.049136	171.339	37.4575
4921539E11Rik	2.22105	0.00160336	0.0491945	7.97683	1.32054
1700069B07Rik	2.05321	0.00162494	0.0497987	13.3618	2.72235
Hmcn2	1.85304	0.00163193	0.0499549	22.0203	5.43267
Ifi27l2a	-1.94647	0.00166011	0.0504078	0	1.45704
Igkv12-41	-1.95307	0.00166011	0.0504078	0	1.39814
Kcnh4	2.13648	0.00165487	0.0504078	9.99683	1.79914
Nkx2-3	2.26579	0.0016534	0.0504078	4.13901	0.392077
Obox4-ps3	-2.04957	0.00166011	0.0504078	0	1.89375
Olfr857	-1.9794	0.00166011	0.0504078	0	1.56269
Tmem158	1.4111	0.00165262	0.0504078	133.742	49.9008
Ccdc136	2.05584	0.00166694	0.0505567	13.5716	2.54085
Cym	-2.02102	0.00167296	0.0506812	2.57778	11.3324
Adcy2	1.63853	0.00169353	0.0512453	38.8546	11.9264
Thnsl1	1.6374	0.00170544	0.0515465	40.7959	12.059
Gabbr1	-1.42224	0.00171163	0.0516745	39.7794	109.713
Gm7598	2.27569	0.00171739	0.0517298	5.43587	0.823748
Hoxc11	2.08723	0.00171714	0.0517298	12.0867	2.70206
Hey2	2.20294	0.00172075	0.0517719	7.46379	1.23402
St8sia3	-1.44233	0.00172444	0.0518235	33.871	95.0124
Susd4	2.21911	0.00173356	0.0519791	8.28273	1.12672
Zfp580	2.09085	0.00173218	0.0519791	12.4237	2.5562
Tbx2	1.93412	0.00173653	0.0520091	18.6079	4.05573
Il22ra1	-1.61723	0.00173933	0.0520337	13.0872	40.3355
Hmgb1-rs17	2.12974	0.00177479	0.0530345	10.1371	1.76125
Gdf10	2.06137	0.00178273	0.0532114	12.4505	2.42763
Emilin3	2.2481	0.00181493	0.0540501	6.40793	1.22276
Kcnt1	1.79362	0.00181306	0.0540501	26.0468	6.84333
Lrrc73	2.18144	0.00182187	0.0541954	9.26078	1.58344
Hnf1b	-1.39053	0.00182691	0.054284	53.2889	140.828
Cpt1c	2.08096	0.00186292	0.0552917	12.1958	2.3217
Glod5	2.22151	0.00186695	0.055349	3.66763	0.510917
Omp	-1.59813	0.00188188	0.0557291	13.2271	41.2271
Shisa6	-2.08322	0.00188549	0.0557734	17.4597	76.1365
Elavl3	2.06028	0.00190056	0.0560332	12.779	2.23134
Lingo4	2.22676	0.00190345	0.0560332	3.81324	0.378638
Mixl1	2.07327	0.00190491	0.0560332	11.9377	2.58996
Skint3	-2.12762	0.00189775	0.0560332	1.34628	7.44088
Svil	-1.41218	0.00190252	0.0560332	42.6627	113.123
Phxr4	-1.55698	0.00191702	0.0563267	15.9795	48.0674
Sh3rf2	1.72021	0.00193171	0.056695	29.6477	8.32753
2310050C09Rik	2.14332	0.00198749	0.0572821	2.55155	0.190609
4930439D14Rik	2.2449	0.00198749	0.0572821	2.93303	0.143281
Actl7a	2.22608	0.00198749	0.0572821	3.0183	0.190585
Adgra1	2.23523	0.00198635	0.0572821	4.99122	0.899515
Cdh6	-1.73524	0.0019811	0.0572821	8.30881	25.5557
Chst13	2.22131	0.00198749	0.0572821	3.00859	0.202157
Cldn1	2.06557	0.00198076	0.0572821	50.9404	11.9094
Clec4n	2.13842	0.00198749	0.0572821	2.52862	0.21597
Fam129c	2.24217	0.00196152	0.0572821	6.27298	0.738922
Gm39041	-1.61318	0.00197082	0.0572821	11.9565	38.5518
Gm39132	2.1922	0.00198749	0.0572821	2.84256	0.245874
Gpr25	1.90144	0.00197334	0.0572821	19.2216	5.00328
Peg12	2.06831	0.00198614	0.0572821	11.608	2.19566
Ppp1r27	2.15633	0.00198749	0.0572821	2.63496	0.18992
Sema6d	-1.63462	0.00196444	0.0572821	11.9742	36.982
Six3os1	1.78469	0.00198866	0.0572821	25.264	6.47625
Slc6a19os	2.22697	0.00198749	0.0572821	3.01058	0.213532
Gm9625	-1.84845	0.00199464	0.0573917	4.04693	18.6521
Klrb1c	-2.12308	0.00199903	0.0574551	0.619187	4.20235
TrnI	1.89098	0.00200847	0.0576636	17.4959	4.73809
Pcna-ps2	2.13987	0.00203334	0.0583141	7.35511	1.29179
4933417C20Rik	2.20102	0.00203947	0.0584265	3.49877	0.294466
Slc35f4	1.93478	0.00204735	0.0585884	16.566	4.18175
Prob1	1.7901	0.00204985	0.0585963	22.4065	6.66795
Cldn3	-1.83973	0.00207193	0.0589924	5.18762	18.2798
Gjc2	2.15396	0.00206757	0.0589924	8.3742	1.39076
Gm6939	-2.09762	0.00207266	0.0589924	0.173024	2.46432
LOC100534330	-2.05731	0.00207266	0.0589924	0.212947	2.36525
Sgk2	1.97895	0.00207711	0.0590552	13.3124	3.06339
Nckap5los	2.21768	0.00208236	0.0591409	4.03849	0.336154
Gm13657	2.16915	0.00208507	0.059154	7.23947	1.32445
Scarf1	1.8325	0.00209451	0.0593581	21.765	5.8508
Palm3	1.94983	0.00209834	0.0593664	15.924	3.72025
Wdr86	2.2213	0.00209931	0.0593664	6.21555	1.02754
Papln	2.11074	0.00210689	0.0595168	10.5838	1.7945
Ace	1.65111	0.00211157	0.0595852	33.6273	10.4219
Gal3st3	2.20338	0.00212654	0.0599435	7.2812	1.05566
Fkbp11	2.20059	0.00215034	0.0605496	5.14021	0.770328
A530095I07Rik	1.97192	0.00228925	0.0606997	1.39727	0
Ankrd2	2.01471	0.00228925	0.0606997	1.50402	0
Apol10a	2.04054	0.00228925	0.0606997	1.66777	0
Armc4	1.9717	0.00223105	0.0606997	14.8311	3.6583
Bank1	-1.82485	0.0021926	0.0606997	5.67228	20.9594
BC026762	2.08934	0.00228925	0.0606997	1.78401	0
Bhlhb9	1.72905	0.00224528	0.0606997	27.8666	8.0533
Bpifa5	1.97806	0.00228925	0.0606997	1.477	0
Cd7	2.06231	0.00228925	0.0606997	1.87384	0
Cenpi	1.98672	0.00221114	0.0606997	13.5064	3.44739
Cox4i2	2.09708	0.00228925	0.0606997	1.85934	0
Cst8	2.07162	0.00228925	0.0606997	1.77268	0
Elf5	2.18731	0.00222662	0.0606997	3.77361	0.380529
Fam170b	1.96956	0.00228925	0.0606997	1.42978	0
Gm10614	2.21092	0.00219165	0.0606997	5.83027	0.778512
Gm11853	2.12929	0.00228925	0.0606997	1.96509	0
Gm11956	1.94964	0.00228925	0.0606997	1.39682	0
Gm12980	1.90993	0.00228925	0.0606997	1.29715	0
Gm14245	2.03188	0.00228925	0.0606997	1.63634	0
Gm14576	1.95641	0.00228925	0.0606997	1.39975	0
Gm15083	2.10134	0.00228925	0.0606997	1.93337	0
Gm17021	2.02828	0.00228925	0.0606997	1.6662	0
Gm18875	2.0264	0.00228925	0.0606997	1.61753	0
Gm27199	2.0942	0.00228925	0.0606997	1.83614	0
Gm3017	2.04923	0.00228925	0.0606997	1.6826	0
Gm44026	2.10161	0.00228925	0.0606997	1.84604	0
Gm5049	1.94588	0.00228925	0.0606997	1.32922	0
Gm5710	2.1432	0.00228925	0.0606997	1.99837	0
Gm7269	2.03124	0.00228925	0.0606997	1.58768	0
Gm7399	2.01124	0.00228925	0.0606997	1.58743	0
Gm9397	2.14942	0.00228925	0.0606997	2.09711	0
Gm9857	2.1399	0.00228925	0.0606997	1.99871	0
Grhl3	2.21309	0.00220805	0.0606997	4.84269	0.618747
H2-Bl	2.01261	0.00228925	0.0606997	1.48633	0
Kcnh3	2.11891	0.00219262	0.0606997	9.2846	1.81053
LOC105246638	1.93532	0.00228925	0.0606997	1.39101	0
Lrp8os3	1.96992	0.00228925	0.0606997	1.34854	0
Mrgpra4	1.91898	0.00228925	0.0606997	1.36794	0
Nat1	2.0813	0.00228925	0.0606997	1.78367	0
Nmur1	1.87265	0.00228925	0.0606997	1.19917	0
Olfr376	2.10948	0.00228925	0.0606997	1.91031	0
Ppp1r3g	2.19216	0.00221194	0.0606997	3.83146	0.380504
Prl6a1	2.00854	0.00228925	0.0606997	1.49526	0
Prss34	2.08535	0.00228925	0.0606997	1.80359	0
Shbg	2.00222	0.00228925	0.0606997	1.46423	0
Slc45a1	2.07054	0.00219882	0.0606997	10.8974	2.34944
Slfn3	2.06549	0.00228925	0.0606997	1.67275	0
Sox2	2.05069	0.00221341	0.0606997	11.7908	2.4297
Sult1b1	1.52358	0.00217026	0.0606997	86.9292	29.3974
Taar5	2.07185	0.00228925	0.0606997	1.71052	0
Tbx10	1.9521	0.00228925	0.0606997	1.35248	0
Tex19.2	2.0084	0.00228925	0.0606997	1.60948	0
Tnnc2	2.13906	0.00228925	0.0606997	2.03331	0
Trp73	2.09716	0.00228316	0.0606997	10.4086	1.77433
Ttll9	2.20854	0.00220857	0.0606997	4.71232	0.719353
Vmn2r60	1.82824	0.00228925	0.0606997	1.05264	0
Zdhhc22	2.0746	0.00228925	0.0606997	1.80445	0
Zkscan16	2.19112	0.00222946	0.0606997	3.8932	0.385746
Cd6	2.20963	0.00229379	0.060759	5.01006	0.536552
Gm12943	2.17923	0.00230422	0.060974	3.74493	0.380504
BC027072	2.21066	0.0023108	0.0610868	6.49027	1.10944
Pdlim2	1.83859	0.00232907	0.061413	20.9327	5.14241
Pla2g10os	2.20302	0.00233013	0.061413	4.80191	0.51487
Usp27x	1.96383	0.00232859	0.061413	14.3944	3.61305
Fbxo27	2.16128	0.00235327	0.0619608	7.68388	1.08198
Brsk2	1.73936	0.00235996	0.0620131	26.2191	7.63663
Slc16a8	2.13104	0.00235938	0.0620131	7.89484	1.16341
Cnn2	-1.69444	0.00242449	0.0636452	8.90633	27.2762
Cideb	-1.53615	0.00243775	0.0639297	15.8073	47.3631
Fbll1	2.12301	0.00244252	0.063991	8.4631	1.7385
Wnt10a	2.18615	0.00249642	0.0653383	5.71488	0.8639
Cyp2c23	1.82226	0.0025003	0.0653749	18.7191	4.67921
Gm13063	1.97639	0.00250807	0.065513	13.5218	2.87892
Slc7a3	2.1462	0.00251083	0.0655203	7.96416	1.42897
Acp7	2.18396	0.00251606	0.065557	4.68543	0.556162
Ambp	-1.73775	0.00251722	0.065557	6.86175	23.2783
Gm11977	2.14467	0.00253737	0.0659515	3.45244	0.335833
Gm9694	2.18355	0.00253684	0.0659515	5.84937	0.90197
Padi3	2.14595	0.0025404	0.0659653	8.20819	1.65673
Lyve1	2.08568	0.00254381	0.0659888	8.9463	2.16653
Ajap1	2.03169	0.00255548	0.0662265	11.7175	2.43926
Lmntd1	2.06404	0.00259854	0.0672763	9.35248	1.85305
Amh	1.86288	0.00261903	0.06774	18.1761	4.93474
Carmil3	2.1457	0.00264752	0.0682091	8.08273	1.09021
Exoc3l2	1.66695	0.00264445	0.0682091	31.8934	10.0872
Foxc2	2.04948	0.00264145	0.0682091	10.9533	2.04265
Tfap2e	2.17755	0.00264623	0.0682091	5.81532	0.811932
Cracr2a	1.90091	0.00268736	0.0691271	14.9516	3.50778
Hmx1	2.13088	0.00268839	0.0691271	7.57801	1.29783
Gm11549	2.18049	0.00269499	0.0692291	6.24612	0.951633
Diras1	2.02001	0.00270252	0.0693552	11.9426	2.60966
Zkscan4	2.17048	0.00273508	0.0701223	5.12749	0.816277
Gpr132	2.13447	0.00274061	0.0701958	3.6558	0.498506
Rep15	1.95318	0.00276597	0.0707767	160.412	39.346
Itsn1	1.37979	0.00277095	0.0708353	133.268	50.6445
1700048O20Rik	2.20006	0.00284648	0.0713814	3.02979	0.220328
4932414J04Rik	2.15748	0.00284342	0.0713814	3.63362	0.333545
4933435F18Rik	2.15177	0.00283833	0.0713814	4.60057	0.728777
5830473C10Rik	2.09086	0.00284648	0.0713814	2.4274	0.14296
A530006G24Rik	2.08155	0.00284648	0.0713814	2.54945	0.18992
Caly	2.15817	0.00284648	0.0713814	2.69955	0.14296
Cdx4	2.02762	0.00284648	0.0713814	2.43994	0.345822
Cthrc1	2.17242	0.00284648	0.0713814	2.98226	0.255458
D230022J07Rik	2.14815	0.00284648	0.0713814	2.80628	0.249253
Entpd4	2.15763	0.00284342	0.0713814	3.97446	0.45726
Fam26f	2.17857	0.00284648	0.0713814	2.98646	0.190585
Fcrl6	2.10828	0.00284648	0.0713814	2.61101	0.18992
Gm13112	2.12997	0.00284648	0.0713814	2.60669	0.14296
Gm18849	2.16425	0.00280402	0.0713814	5.08358	0.749274
Gm5340	1.99564	0.00284648	0.0713814	2.16446	0.190609
Kcnk18	2.17093	0.00284342	0.0713814	3.82405	0.392475
Ltb4r1	2.1628	0.00284342	0.0713814	3.7452	0.347233
Serpina7	2.14225	0.00284342	0.0713814	3.59737	0.347233
Tas1r2	2.12569	0.00284342	0.0713814	3.59671	0.392213
Ttc36	2.06941	0.00284648	0.0713814	2.67327	0.345822
Drc7	2.12375	0.00285034	0.0714102	3.81283	0.379928
Emp2	-1.65538	0.00287876	0.0720537	8.68989	28.1718
Lypd4	2.12571	0.00290002	0.0725169	3.81452	0.598034
Ttll8	2.13544	0.00292259	0.0730122	6.32855	0.851562
Ung	1.84343	0.00294431	0.073485	16.5182	4.52043
P3h3	1.96841	0.00299814	0.0747577	13.0971	2.69148
6030445D17Rik	2.14917	0.00301194	0.0750107	5.7206	0.790215
BB014433	2.13144	0.00301397	0.0750107	6.72633	0.936314
Gm31816	2.04479	0.003018	0.0750399	9.90981	1.82494
Irs4	2.10194	0.00302337	0.0750935	6.98659	1.24756
Izumo2	2.11109	0.0030287	0.0750935	3.78028	0.570578
Sgo1	2.05298	0.00302717	0.0750935	8.50012	1.87264
Adra1b	2.10874	0.00304735	0.075485	7.53199	1.35722
Prss2	-2.68252	0.00306964	0.0759658	3.20045	25.2948
Ckm	2.06482	0.00307326	0.0759838	8.83487	1.59017
Dmbt1	-1.84665	0.00311916	0.0769024	3283.01	11821.5
Fbln2	-1.7228	0.00311706	0.0769024	6.5202	22.6366
Gm4149	-1.41174	0.00311532	0.0769024	29.9439	84.5127
Flnb	-1.45885	0.00315244	0.0776205	679.256	1869.49
Stk31	1.69586	0.00315418	0.0776205	27.7885	8.07418
Ccdc96	1.88991	0.00316121	0.0776485	15.6547	3.14232
Cd209e	2.09781	0.00315975	0.0776485	7.61275	1.62046
Cyp2c54	2.08908	0.00317021	0.0777971	3.43245	0.535742
Abcg5	2.08643	0.00319292	0.0782814	6.83289	1.49456
Rasd2	2.14277	0.00323219	0.0791707	6.06186	0.807902
Cpne4	1.58226	0.00323917	0.0792679	40.6517	14.1505
Gpr137b-ps	-1.79312	0.00325216	0.0795121	5.12298	17.5707
C3	-2.12428	0.00325765	0.0795724	16.6045	78.0289
Fcrls	2.06667	0.00327061	0.079815	7.70374	1.52277
Pitx3	2.05212	0.00328427	0.0800742	8.98743	1.79063
0610038B21Rik	1.89493	0.00329056	0.0800795	14.8728	3.23458
Trim54	2.16587	0.00328902	0.0800795	4.75747	0.419622
Lyl1	2.00006	0.00331957	0.0806691	9.86076	2.24232
Tlx1	2.12905	0.00332091	0.0806691	5.62386	0.794219
Fibcd1	2.08987	0.00332538	0.0807032	7.5979	1.55759
Cdc20	2.04721	0.00333517	0.0808664	8.80072	1.53157
5930422O12Rik	2.11887	0.00336575	0.0815328	4.63462	0.55759
L1cam	-1.45064	0.0033823	0.0818584	23.6256	64.2875
Gjb3	-1.92739	0.00339721	0.082144	3.21991	10.5945
Gm6012	2.11321	0.0034111	0.0823287	4.45863	0.630449
Scand1	1.84854	0.00340936	0.0823287	16.5471	3.84547
Csrp2	1.68509	0.00343415	0.0828091	24.5259	7.01472
Gm10118	2.06793	0.00344397	0.08297	3.50511	0.431874
Cux2	1.61225	0.00345691	0.0832057	33.6846	10.817
Vdr	-1.46392	0.00346421	0.0833054	20.8634	61.2873
Dchs1	1.92411	0.0034702	0.0833733	13.7975	3.65244
Fxyd1	2.0648	0.00349465	0.0837187	8.12514	1.2896
Gm4081	1.65068	0.00349613	0.0837187	30.4458	8.9564
Ms4a1	-1.70436	0.00349728	0.0837187	7.38082	23.3076
Neurog1	2.04538	0.00348998	0.0837187	9.28803	1.84289
1700013M08Rik	2.05786	0.00352479	0.0843006	3.41308	0.381169
4930505N22Rik	2.11183	0.00355837	0.0846416	5.44384	0.813223
9030619P08Rik	-1.72577	0.00357116	0.0846416	0	1.02654
Barhl1	1.84939	0.00356781	0.0846416	16.157	4.19175
Gfra2	2.06087	0.00355482	0.0846416	7.91544	1.24543
Gm12819	-1.80613	0.00357116	0.0846416	0	1.25144
Gm9672	-1.83894	0.00357116	0.0846416	0	1.41508
Hbb-bt	-1.86376	0.00357116	0.0846416	0	1.53023
Ip6k3	2.10113	0.00354722	0.0846416	4.52186	0.866488
Mir6381	-1.77987	0.00357116	0.0846416	0	1.17137
Wfdc17	-1.80905	0.00357116	0.0846416	0	1.32539
Sim2	1.9905	0.00358003	0.0847757	10.0523	2.18749
Gm26578	2.0572	0.00359585	0.0850738	8.37248	1.56122
Rsph14	2.11039	0.00362577	0.0857048	5.58239	0.747539
Ccdc177	1.90898	0.00365093	0.0859259	14.2121	3.17996
Fam43b	2.04994	0.00365143	0.0859259	7.61045	1.3352
Hs3st6	2.07518	0.00364967	0.0859259	7.28654	1.23413
Lypd6b	1.48453	0.00364088	0.0859259	53.9641	18.9519
Tnfsf13	1.97867	0.00364819	0.0859259	8.99002	1.96293
Aspa	-1.53327	0.00366137	0.086083	14.6495	41.4862
1700012A03Rik	1.98835	0.00394219	0.0861529	1.70488	0
1700022N22Rik	1.90286	0.00394219	0.0861529	1.60328	0
1700044K03Rik	1.90127	0.00394219	0.0861529	1.3797	0
1700060C20Rik	1.83482	0.00394219	0.0861529	1.22611	0
1700080O16Rik	1.91206	0.00394219	0.0861529	1.452	0
2900069G24Rik	1.91396	0.00394219	0.0861529	1.457	0
4930443G03Rik	1.90048	0.00394219	0.0861529	1.42587	0
4930467K11Rik	1.83978	0.00394219	0.0861529	1.21646	0
4930500L23Rik	1.94829	0.00394219	0.0861529	1.59425	0
4933404O12Rik	1.82468	0.00391776	0.0861529	16.2289	4.0103
4933409D19Rik	2.22737	0.00388261	0.0861529	4.73465	0.429502
6030407O03Rik	1.86591	0.00394219	0.0861529	1.33384	0
6330409D20Rik	1.95363	0.00394219	0.0861529	1.61513	0
A730035I17Rik	2.06782	0.00385687	0.0861529	7.52302	1.10853
AU015228	1.90242	0.00394219	0.0861529	1.37712	0
Awat1	1.80251	0.00394219	0.0861529	1.19203	0
B3galnt1	2.10501	0.00388261	0.0861529	4.08953	0.628103
Bfsp2	1.88702	0.00394219	0.0861529	1.36997	0
Bhlha15	1.85094	0.00383303	0.0861529	14.3364	3.4757
C130032M10Rik	1.73677	0.00394219	0.0861529	1.00623	0
Cck	-2.01898	0.0036725	0.0861529	1.27467	6.45958
Cdc45	1.92151	0.00378865	0.0861529	12.0607	3.19008
Clec18a	2.06828	0.00388261	0.0861529	3.50493	0.442126
Clnkos	1.84455	0.00394219	0.0861529	1.21691	0
E130006D01Rik	1.96216	0.00394219	0.0861529	1.64587	0
E330023G01Rik	1.87088	0.00394219	0.0861529	1.32453	0
En1	-1.71349	0.00372894	0.0861529	6.44856	20.947
Erich4	1.86907	0.00394219	0.0861529	1.30357	0
Extl1	2.06299	0.00379966	0.0861529	6.98815	1.14383
Foxr2	2.09349	0.00388261	0.0861529	3.59025	0.392213
Gm10156	1.80563	0.00394219	0.0861529	1.24014	0
Gm12426	1.91541	0.00394219	0.0861529	1.46525	0
Gm12460	1.85718	0.00394219	0.0861529	1.26825	0
Gm12666	1.98102	0.00394219	0.0861529	1.686	0
Gm14139	1.90826	0.00394219	0.0861529	1.50361	0
Gm14800	1.97289	0.00394219	0.0861529	1.67282	0
Gm14854	1.97555	0.00394219	0.0861529	1.74627	0
Gm14926	1.84679	0.00394219	0.0861529	1.30676	0
Gm15379	1.90419	0.00394219	0.0861529	1.44527	0
Gm15715	1.94332	0.00394219	0.0861529	1.52947	0
Gm15742	1.91646	0.00394219	0.0861529	1.51656	0
Gm15925	1.99263	0.00394219	0.0861529	1.77391	0
Gm16157	1.98879	0.00394219	0.0861529	1.68772	0
Gm16677	2.00362	0.00394219	0.0861529	1.79931	0
Gm17094	2.03441	0.00388261	0.0861529	3.27857	0.497007
Gm17575	1.93579	0.00394219	0.0861529	1.53228	0
Gm17657	1.91122	0.00394219	0.0861529	1.61793	0
Gm17983	1.85646	0.00394219	0.0861529	1.30989	0
Gm20377	1.85163	0.00394219	0.0861529	1.28855	0
Gm30808	1.99782	0.00394219	0.0861529	1.75757	0
Gm34701	1.83692	0.00394219	0.0861529	1.21615	0
Gm40377	1.92975	0.00394219	0.0861529	1.49256	0
Gm5414	1.93735	0.00394219	0.0861529	1.57547	0
Gm6659	1.89598	0.00394219	0.0861529	1.42761	0
Gm8197	1.96604	0.00394219	0.0861529	1.68748	0
Gm8449	1.83873	0.00394219	0.0861529	1.18091	0
Gm8793	1.7898	0.00394219	0.0861529	1.11314	0
Gm9164	1.89844	0.00394219	0.0861529	1.45617	0
Gm9826	1.96205	0.00394219	0.0861529	1.73521	0
Gnmt	2.05181	0.00388261	0.0861529	3.51984	0.382793
Grid1	1.91736	0.00368142	0.0861529	12.88	2.88018
H2-Pa	1.86269	0.00394219	0.0861529	1.30248	0
Hmgcs2	2.13128	0.00371208	0.0861529	38.1158	8.07194
Il6ra	1.56941	0.00393583	0.0861529	37.1417	12.8378
LOC101056233	1.85852	0.00394219	0.0861529	1.28034	0
Mill1	2.08709	0.00388261	0.0861529	3.64865	0.333866
Msmb	1.98233	0.00394219	0.0861529	1.72117	0
Mymx	1.8744	0.00394219	0.0861529	1.32893	0
Olfr1073-ps1	1.97884	0.00394219	0.0861529	1.66752	0
Olfr586	1.89303	0.00394219	0.0861529	1.43214	0
Olfr738	1.86739	0.00394219	0.0861529	1.34114	0
Pdcd1	1.9003	0.00394219	0.0861529	1.41696	0
Serpina3j	1.83631	0.00394219	0.0861529	1.22985	0
Shisa8	2.02	0.00390274	0.0861529	9.26105	2.05636
Slc8a3	2.06559	0.00375423	0.0861529	7.03297	1.16349
Snord100	-1.9075	0.0038479	0.0861529	0.307932	2.50849
Sycn	-1.97541	0.00379053	0.0861529	1.26437	6.52521
Taar2	1.97492	0.00394219	0.0861529	1.67682	0
Tbkbp1	1.95212	0.00372782	0.0861529	11.7862	2.59085
Tex13c3	1.88864	0.00394219	0.0861529	1.48638	0
Tnfsf14	2.08432	0.00388261	0.0861529	3.55205	0.341794
Ttll2	1.95541	0.00394219	0.0861529	1.62325	0
Vmn1r236	-2.04474	0.0038479	0.0861529	0.331579	3.37782
Wfdc1	1.99849	0.00394219	0.0861529	1.85079	0
Wnt6	2.05792	0.00367781	0.0861529	8.33563	1.34216
Stkld1	2.05489	0.00397659	0.0868327	6.80061	1.01822
Kif5a	1.61327	0.00398921	0.0870361	32.6567	10.3246
1600015I10Rik	2.12085	0.0040987	0.0874699	2.77229	0.143281
4930483J18Rik	2.11714	0.0040987	0.0874699	2.75623	0.133701
4930558J22Rik	2.06399	0.0040843	0.0874699	3.98267	0.47653
Adora2b	2.12585	0.0040987	0.0874699	3.01582	0.24129
Arl4d	2.02135	0.0040709	0.0874699	3.36368	0.52889
C430049B03Rik	2.03697	0.0040641	0.0874699	8.19119	1.40007
Calb2	2.00734	0.0040987	0.0874699	2.33481	0.192873
Cep112it	1.68936	0.00405066	0.0874699	25.1932	7.12581
Cpt1b	2.1803	0.0040987	0.0874699	3.26021	0.190585
Cyp1a1	2.00648	0.0040987	0.0874699	2.33133	0.190585
Elk3	-1.46605	0.00409858	0.0874699	19.9722	54.3427
Ercc6l	2.00597	0.00402882	0.0874699	7.78928	1.39963
Fgf22	2.1002	0.0040987	0.0874699	3.07053	0.377705
Gm15420	2.09367	0.0040987	0.0874699	2.66213	0.189319
Gm16299	2.09139	0.0040987	0.0874699	2.83384	0.21597
Gm1698	2.12047	0.0040987	0.0874699	2.7237	0.133701
Gm5066	1.97255	0.0040987	0.0874699	2.39802	0.345822
Gm6344	2.08262	0.0040987	0.0874699	2.64008	0.143281
Il17b	2.21877	0.0040987	0.0874699	3.27682	0.133701
Klhdc7b	2.06085	0.0040987	0.0874699	2.49754	0.143281
Olfr186	2.02172	0.0040987	0.0874699	2.44258	0.18992
Olfr563-ps1	2.01322	0.0040987	0.0874699	2.4095	0.24129
Olfr601	2.10704	0.0040987	0.0874699	2.63805	0.151185
Sec14l5	2.04189	0.0040987	0.0874699	2.36597	0.151185
Unc45bos	1.97024	0.0040987	0.0874699	2.20996	0.245874
Vldlr	1.41962	0.00401432	0.0874699	74.8483	27.4253
Vmn1r204	2.11352	0.0040987	0.0874699	2.80275	0.18992
Syt17	1.95193	0.00415159	0.0885269	10.722	2.11513
Hs3st2	1.93517	0.00416394	0.0887185	11.5522	2.37133
Gm13857	1.64807	0.00419147	0.0892329	29.894	9.01337
Ly6g6f	-1.99071	0.00421583	0.089679	1.14761	6.09292
Olfr270	-1.92886	0.00422964	0.0898279	0.634132	3.22538
Plin2	-1.53208	0.0042295	0.0898279	12.4992	39.0737
Chrm3	1.51494	0.0042516	0.0902216	42.1234	14.8624
Gng7	1.85007	0.00425677	0.0902586	14.6295	3.61185
Rab11fip5	-1.64489	0.00427836	0.0906434	8.26793	25.3522
Sytl4	1.77872	0.00428496	0.0907105	17.1922	4.61481
Tenm3	1.60331	0.00429159	0.0907779	32.5474	10.1822
Gfy	2.02109	0.0043042	0.0909192	8.07206	1.74946
Ric3	1.76382	0.00430517	0.0909192	18.1101	4.37721
Avpr2	-1.98613	0.00431518	0.0910576	1.28754	6.27787
Wnt8b	2.05118	0.00432074	0.0911019	5.68968	0.83918
1700041G16Rik	2.0408	0.00433576	0.0911997	7.06446	1.07248
Nlgn3	2.03418	0.00433343	0.0911997	6.94971	1.43266
Slc1a2	1.55343	0.00433228	0.0911997	40.0256	12.9787
Clec4f	2.03762	0.00437059	0.091859	6.85664	1.06296
Nags	2.04633	0.00441159	0.0926469	5.94144	1.03655
Atm	1.37673	0.00441965	0.0926686	96.6972	37.0433
Insc	2.05091	0.00441874	0.0926686	6.15397	0.986768
Htr6	1.93481	0.00446929	0.0936348	10.425	2.35648
Ephx3	2.058	0.00448457	0.0938802	4.70804	0.613029
Dgki	-1.6454	0.00453574	0.0948009	8.63204	26.5017
Sp3os	1.97675	0.00453244	0.0948009	2.87363	0.392766
Atp6v1b1	1.8546	0.00456614	0.0953606	13.8994	3.37583
LOC102637806	1.96653	0.00460088	0.0960102	8.99906	1.86349
Fam184a	2.04276	0.00460965	0.0961171	4.34855	0.625713
Tfr2	1.89145	0.00470989	0.0981296	12.5123	3.6105
Tmprss6	2.04601	0.00471386	0.0981346	5.14198	0.673985
Cela3b	-1.96032	0.00473761	0.0985514	0.960322	5.42118
Cdh15	2.04413	0.00475526	0.0988405	5.42514	1.24486
Atcayos	1.92037	0.00477535	0.0990237	10.329	2.4998
Ebf2	1.9179	0.00477417	0.0990237	10.0585	2.54766
Mboat2	1.82336	0.00476801	0.0990237	14.1061	3.43461
Stc2	1.73331	0.00478439	0.0991331	18.0671	4.97554
Zdhhc15	-1.58102	0.00481024	0.0995905	10.311	31.3074
Gm10684	-1.81844	0.00485047	0.100345	2.84254	11.8566
Dnajc10	1.5278	0.00486328	0.100531	305.189	106.358
Nrtn	2.03429	0.00488642	0.100907	6.624	1.22864
Prf1	2.03288	0.00488915	0.100907	4.45747	0.640903
Fgfbp1	2.00299	0.00490722	0.101201	6.52527	1.44279
Foxd1	1.85685	0.00491398	0.101261	13.1846	3.23212
Gng13	-1.94542	0.00492201	0.101347	1.11961	4.33869
Gm4737	2.01622	0.00494906	0.101825	3.95434	0.558649
Rasip1	1.84084	0.00496452	0.102063	13.6187	3.39005
Stk32c	2.0274	0.00498035	0.102309	6.03215	0.94595
Gmds	1.32816	0.00500363	0.102707	153.043	60.6188
LOC108167445	1.87432	0.00501969	0.102956	10.488	2.69818
H1fx	1.97342	0.00504591	0.103414	8.20853	1.45366
Loxl4	-1.70978	0.00506447	0.103714	6.38047	18.8236
Pid1	-1.63221	0.00508809	0.104035	7.68183	25.2747
Zfp423	1.86692	0.00508538	0.104035	12.5812	3.07649
Syt3	1.83583	0.00512482	0.104705	13.3904	3.39725
Gm37168	1.84909	0.00514479	0.105032	13.3124	3.4358
Lrrc3	1.8792	0.0051695	0.105455	11.1389	2.44762
Nr5a1	1.95357	0.00519343	0.105861	9.82036	2.0669
Dpysl5	1.85862	0.00520572	0.105948	12.2809	3.27826
Gm13415	2.01785	0.00520488	0.105948	6.20202	1.0263
C730036E19Rik	2.04615	0.00530309	0.106612	3.48886	0.335833
Cfap206	1.97175	0.00530309	0.106612	3.29648	0.511406
Fgf23	2.01829	0.00530309	0.106612	3.58479	0.568314
Gm10857	2.06498	0.00530309	0.106612	3.43042	0.276662
Gm14845	1.95954	0.00530308	0.106612	3.49694	0.757699
Gm6420	1.95919	0.00530309	0.106612	3.00779	0.392213
Lrrc30	1.97514	0.00530309	0.106612	3.28621	0.408843
Neurl1a	1.62129	0.00524363	0.106612	28.7018	9.31038
Nme5	2.07023	0.00530309	0.106612	3.6048	0.30237
Rassf10	2.00282	0.00528917	0.106612	6.83399	1.00759
Rprm	2.03585	0.00530309	0.106612	3.74286	0.46899
Slc2a7	2.0303	0.00530309	0.106612	3.60424	0.438572
St6galnac1	1.98276	0.00530309	0.106612	3.08622	0.381218
Stpg3	1.98683	0.00530309	0.106612	3.50176	0.535742
Tcap	2.03267	0.00530309	0.106612	3.35331	0.345117
Ubap1l	2.03435	0.00530309	0.106612	3.32963	0.285921
Slc6a16	2.02197	0.00532808	0.107033	5.35751	0.82056
Xdh	-1.43999	0.00534648	0.107321	18.9176	53.9708
Dbx1	2.00614	0.00537293	0.107625	4.24139	0.600575
Fzd10	1.8601	0.00537149	0.107625	12.7711	3.24721
Mlxipl	1.77954	0.00537796	0.107625	16.234	4.32132
Nkain4	1.94672	0.00537706	0.107625	3.33319	0.431874
Kcnip2	1.98086	0.00539243	0.107832	8.15859	1.62739
Muc6	2.07571	0.00542601	0.108421	10320.4	2448.79
Cytip	1.74096	0.00548912	0.1096	16.6509	4.78064
6330410L21Rik	1.96376	0.005531	0.110352	6.98954	1.44111
Tnfrsf10b	-1.47329	0.00559197	0.111484	15.7335	45.9587
Rhobtb1	1.66058	0.00560478	0.111655	52.0139	14.9496
Hhatl	1.99729	0.00563623	0.112197	4.49083	0.75607
Rps6ka2	1.6951	0.00565253	0.112436	22.7243	6.08523
Fgf3	1.99594	0.00566251	0.112531	4.46942	0.850534
Tmem231	1.80365	0.00566585	0.112531	13.325	3.49629
4930426D05Rik	1.93407	0.00570404	0.113205	9.33183	1.93138
St18	-1.61872	0.00573352	0.113704	7.7183	25.1019
Gm32592	1.98934	0.00575447	0.114034	4.26645	0.532115
Gm10415	2.04504	0.00577992	0.114366	4.93466	0.679734
Gm26592	1.99557	0.00577992	0.114366	4.27731	0.574901
C1ql1	1.96569	0.00578874	0.114455	7.80904	1.39128
Hes3	1.91177	0.00581971	0.114981	9.84371	2.20512
Gbx2	1.98626	0.00582788	0.115056	5.94195	1.24008
Klhl30	1.98505	0.00583341	0.115079	3.96805	0.527211
1700013G24Rik	1.98127	0.00594252	0.115417	2.55367	0.21597
2810471M01Rik	2.12606	0.00594252	0.115417	3.06247	0.151185
4930511E03Rik	1.90642	0.00594252	0.115417	2.15767	0.143281
4930527J03Rik	1.98581	0.0059373	0.115417	4.32391	0.546733
Dcdc2c	1.93031	0.00594252	0.115417	2.25991	0.202157
Gm10640	1.87299	0.00594252	0.115417	2.14242	0.377705
Gm11240	1.8197	0.00594252	0.115417	1.90503	0.18992
Gm12420	1.92917	0.00594252	0.115417	2.28878	0.21597
Gm7397	2.02654	0.00594252	0.115417	2.60993	0.143281
Lgi3	1.90967	0.00594252	0.115417	2.36234	0.345822
Magea8	1.817	0.00594252	0.115417	1.77157	0.133701
Mfap2	1.93549	0.00594252	0.115417	2.09683	0.14296
Mir7212	1.94195	0.00594252	0.115417	2.34811	0.245874
Pgf	1.97726	0.00594252	0.115417	2.4857	0.18992
Ripply2	1.86318	0.00594252	0.115417	2.11104	0.255458
Rpl7a-ps7	1.88401	0.00594252	0.115417	2.2057	0.24129
Stab2	1.82974	0.00589512	0.115417	13.5396	3.40111
Stpg4	1.91888	0.00594252	0.115417	2.3039	0.378849
Tpsb2	1.86415	0.00594252	0.115417	2.00757	0.220328
Wdr63	1.98534	0.00593327	0.115417	4.27564	0.621794
Zfp474	1.96149	0.00594252	0.115417	2.29025	0.14296
Atp8a2	1.40008	0.00597331	0.11593	70.5517	26.1641
Gm13889	1.99639	0.00599363	0.116238	6.23085	0.889756
Gm38404	1.96556	0.0060572	0.117385	3.78635	0.702908
Fam71a	1.96472	0.00607092	0.117564	6.84115	1.59091
AV064505	-1.81317	0.00608486	0.117748	0.482457	2.51902
Tmem51os1	1.65469	0.00611199	0.118186	22.9891	7.05934
Serpinb6b	-1.90485	0.00614047	0.11865	1.135	4.84191
Trim35	-1.62177	0.00614992	0.118745	7.96144	22.4142
Gm14517	-1.93556	0.00617346	0.118852	0.171254	2.43537
Gm4027	-1.86952	0.00617346	0.118852	0.0711069	1.85522
Olfr1164	-1.75194	0.00617346	0.118852	0.228725	1.68749
Serpinb6d	-1.84493	0.00617346	0.118852	0.236232	2.17523
Tlr11	1.9756	0.00618835	0.119051	5.73273	1.03122
C1qtnf6	1.64276	0.00624302	0.119887	21.959	6.7713
Dpysl2	-1.62886	0.00624544	0.119887	31.9161	101.475
Jdp2	1.91698	0.00624389	0.119887	8.99374	2.06434
Hes5	1.96157	0.00625489	0.119981	6.86834	1.39345
1110032F04Rik	1.95991	0.00627379	0.120256	6.57741	1.18406
Kcnrg	-1.89526	0.00628424	0.120369	0.68395	4.1349
Bub1b	1.80878	0.00629777	0.12054	11.7565	3.13533
Hoxb8	1.73746	0.00630799	0.120648	17.7309	4.89003
Fscn2	1.9846	0.00632025	0.12067	5.52152	0.973579
Nr1d1	-1.37893	0.0063149	0.12067	27.9652	76.185
Pax2	1.68707	0.00632742	0.12067	21.0482	5.67769
Trim67	1.73602	0.00632674	0.12067	17.3789	5.0737
Fendrr	1.83188	0.00634324	0.120868	11.778	2.80195
Xirp1	1.9479	0.006347	0.120868	7.98524	1.58519
St3gal1	-1.68073	0.00641138	0.122006	5.69537	17.0304
Hopxos	1.97311	0.00643466	0.122361	5.15161	0.934345
1700025M24Rik	1.75026	0.00697746	0.123256	1.16866	0
1700028B04Rik	1.8451	0.00697746	0.123256	1.54799	0
1700092C02Rik	1.7675	0.00697746	0.123256	1.33439	0
1700095A13Rik	1.76119	0.00697746	0.123256	1.24435	0
1700120O09Rik	1.63097	0.00697746	0.123256	0.87145	0
1700121N20Rik	1.64457	0.00697746	0.123256	1.02653	0
4930444G20Rik	1.76955	0.00697746	0.123256	1.29633	0
4930452B06Rik	1.82051	0.00656788	0.123256	11.3746	2.86623
4930456G14Rik	1.82526	0.00697746	0.123256	1.49981	0
4930480K02Rik	1.65143	0.00697746	0.123256	0.928676	0
4933430H06Rik	1.76132	0.00697746	0.123256	1.24699	0
6530411M01Rik	1.74281	0.00697746	0.123256	1.26386	0
8430408G22Rik	1.97314	0.00654913	0.123256	34.1556	8.80166
Abcc10	1.29949	0.00662598	0.123256	196.642	80.4834
Adprhl1	1.95894	0.00696497	0.123256	5.96783	0.953546
Apobec2	1.80672	0.00697746	0.123256	1.49703	0
Armc2	1.90406	0.00666525	0.123256	8.34131	1.52846
Begain	1.6845	0.00652566	0.123256	20.3894	5.28009
Ccl17	1.82384	0.00697746	0.123256	1.49765	0
Ces1h	1.82856	0.00697746	0.123256	1.45947	0
Ces2h	1.6896	0.00697746	0.123256	1.0758	0
Clstn3	1.95082	0.00672996	0.123256	7.30673	1.44814
Csmd2	1.66976	0.00663654	0.123256	21.4166	6.12948
Cyp4a30b	1.72037	0.00697746	0.123256	1.09947	0
D5Ertd605e	1.74509	0.00697746	0.123256	1.16444	0
Defb20	1.7584	0.00697746	0.123256	1.43261	0
Ear14	1.77009	0.00697746	0.123256	1.23889	0
Efhc1	1.87897	0.00682214	0.123256	9.06156	1.94456
Fam24a	1.7235	0.00697746	0.123256	1.19535	0
Fxyd5	-1.59735	0.00684673	0.123256	8.06178	24.3526
Gm10654	1.79323	0.00697746	0.123256	1.34888	0
Gm11217	1.68441	0.00697746	0.123256	1.0705	0
Gm11255	1.80617	0.00697746	0.123256	1.34843	0
Gm11359	1.68376	0.00697746	0.123256	1.0309	0
Gm13188	1.8464	0.00697746	0.123256	1.53751	0
Gm13257	1.83282	0.00697746	0.123256	1.5088	0
Gm13527	1.69609	0.00697746	0.123256	1.00214	0
Gm14170	1.8243	0.00697746	0.123256	1.5862	0
Gm14503	1.71788	0.00697746	0.123256	1.08859	0
Gm14898	1.75068	0.00697746	0.123256	1.16815	0
Gm15418	1.72957	0.00697746	0.123256	1.1574	0
Gm16020	1.95253	0.00686198	0.123256	4.7545	0.707792
Gm17824	1.75298	0.00697746	0.123256	1.19201	0
Gm18539	1.7246	0.00697746	0.123256	1.16633	0
Gm18734	1.66346	0.00697746	0.123256	1.01281	0
Gm18862	1.59261	0.00697746	0.123256	0.820405	0
Gm18973	1.82778	0.00697746	0.123256	1.4599	0
Gm19798	1.78649	0.00697746	0.123256	1.28008	0
Gm20426	1.71381	0.00697746	0.123256	1.08048	0
Gm21392	1.78302	0.00697746	0.123256	1.2687	0
Gm2991	1.68462	0.00697746	0.123256	1.07444	0
Gm30978	1.77154	0.00697746	0.123256	1.33257	0
Gm35386	1.8587	0.00697746	0.123256	1.61923	0
Gm36849	1.82583	0.00697746	0.123256	1.46026	0
Gm38411	1.77449	0.00697746	0.123256	1.27333	0
Gm5266	1.76401	0.00697746	0.123256	1.30424	0
Gm5706	1.83525	0.00697746	0.123256	1.54666	0
Gm5975	1.73941	0.00697746	0.123256	1.16215	0
Gm6257	1.79649	0.00697746	0.123256	1.33286	0
Gm648	1.75671	0.00697746	0.123256	1.24183	0
Gm6786	1.79349	0.00697746	0.123256	1.30979	0
Gm7191	1.61297	0.00697746	0.123256	0.849194	0
Gm7984	1.70613	0.00697746	0.123256	1.10821	0
Gm8048	1.7794	0.00697746	0.123256	1.28768	0
Gm8436	1.65747	0.00697746	0.123256	0.967182	0
Gm9701	1.63906	0.00697746	0.123256	0.940679	0
Hcn2	1.59795	0.00655384	0.123256	27.0877	8.50849
Ighm	-1.80449	0.0068874	0.123256	3.12819	11.8981
Igkv13-57-2	1.72628	0.00697746	0.123256	1.12074	0
Inf2	-1.51116	0.00657922	0.123256	12.6963	35.1341
Klk1b14-ps	1.7564	0.00697746	0.123256	1.24196	0
Krt31	1.79089	0.00697746	0.123256	1.37156	0
LOC100534376	1.74674	0.00697746	0.123256	1.29053	0
LOC100534383	1.74012	0.00697746	0.123256	1.19432	0
LOC102633671	1.77528	0.00697746	0.123256	1.297	0
LOC108167491	1.74948	0.00697746	0.123256	1.37366	0
LOC108168799	1.71749	0.00697746	0.123256	1.18636	0
Mki67	2.19329	0.00653055	0.123256	111.961	24.7452
Mup-ps18	-1.81535	0.00664643	0.123256	0.427868	2.814
Obscn	1.54881	0.00679047	0.123256	33.4712	10.4598
Olfr1100	1.77756	0.00697746	0.123256	1.35791	0
Olfr1346	1.74503	0.00697746	0.123256	1.25102	0
Olfr374	1.78757	0.00697746	0.123256	1.31839	0
Olfr412	1.80112	0.00697746	0.123256	1.41189	0
Olfr530	1.76028	0.00697746	0.123256	1.19165	0
Olfr591	1.70094	0.00697746	0.123256	1.1294	0
Olfr657	1.8318	0.00697746	0.123256	1.50851	0
Pgbd1	1.91142	0.00697232	0.123256	6.62282	1.45568
Phyh	1.33733	0.00654788	0.123256	107.046	41.8859
Pisrt1	1.78943	0.00697746	0.123256	1.34353	0
Por	-1.29363	0.00676486	0.123256	77.3847	192.124
Radil	1.89636	0.00662392	0.123256	10.0926	1.84278
Rnase13	1.79774	0.00697746	0.123256	1.35881	0
Rpl21-ps7	1.72754	0.00697746	0.123256	1.14648	0
Sap30l	1.69473	0.0065178	0.123256	19.288	5.55917
Slc22a7	1.91165	0.0068268	0.123256	8.30726	1.90838
Slc24a4	1.95286	0.00683079	0.123256	6.08667	1.50878
Slc2a10	1.56565	0.00690294	0.123256	28.8247	9.09861
Smim9	1.69768	0.00697746	0.123256	1.02701	0
Smok2a	1.94298	0.00666592	0.123256	3.72883	0.543951
Supt20-ps	1.81419	0.00697746	0.123256	1.38252	0
Sync	1.76039	0.00666156	0.123256	15.0352	4.09837
Tas2r140	1.72687	0.00697746	0.123256	1.14835	0
Tgif2-ps1	1.76256	0.00697746	0.123256	1.31193	0
Tlr2	1.7462	0.00679496	0.123256	16.4246	3.78314
Vmn2r-ps20	1.67122	0.00697746	0.123256	1.03541	0
Cpne6	-1.77765	0.00700719	0.123632	3.59623	11.9342
Ltc4s	-1.61753	0.00700813	0.123632	7.19244	21.7665
Stac2	1.85422	0.00701581	0.123685	9.75408	2.43755
Gdap1l1	1.94648	0.00707034	0.124433	4.5971	0.63525
Pcyt1b	-1.57561	0.00707211	0.124433	9.4125	26.715
Plbd1	-1.80663	0.0070724	0.124433	2.27573	10.5949
Gm15693	-1.84632	0.00709651	0.124774	0.678509	3.40223
Klhl31	1.85354	0.00710739	0.124882	9.4877	2.07848
Dmrtb1	1.93121	0.0071237	0.125002	3.7935	0.532403
Ltk	1.79696	0.00712257	0.125002	12.1296	3.04609
4930589P08Rik	2.0216	0.00724815	0.125267	3.42982	0.286562
A430072C10Rik	1.98377	0.00724815	0.125267	3.46365	0.391476
Amer2	1.77856	0.00723475	0.125267	12.8885	3.80312
AU015836	1.87272	0.00724815	0.125267	2.93451	0.435192
Cda	-1.84465	0.00720191	0.125267	2.00041	7.48348
Espl1	1.83663	0.00717754	0.125267	10.1368	2.29236
Fam163b	1.71183	0.00721648	0.125267	17.3526	4.60718
Gm13425	1.82251	0.0072359	0.125267	11.4104	2.89652
Gm14857	2.00684	0.00724815	0.125267	3.36818	0.276982
Gm16288	1.89923	0.00724815	0.125267	3.00784	0.383482
Gm31898	1.8735	0.00724815	0.125267	2.89041	0.431874
Hrh3	1.8268	0.00720984	0.125267	12.0756	3.06481
Kif15	1.72347	0.00722147	0.125267	15.3127	4.24869
Klk12	2.01529	0.00724815	0.125267	3.80764	0.475787
LOC108168272	1.89604	0.00724815	0.125267	2.90001	0.392534
Olfr1292-ps1	-1.55151	0.0072069	0.125267	0	0.863961
Olfr672	-1.63177	0.0072069	0.125267	0	1.11846
Olfr70	1.88874	0.00724815	0.125267	2.95002	0.359252
Ovol2	1.75871	0.00719642	0.125267	13.2297	3.35757
P4htm	1.89618	0.00723503	0.125267	7.94044	2.08823
Rpl3l	1.94357	0.00724815	0.125267	3.23782	0.448331
Rpl9-ps7	1.84935	0.00719433	0.125267	2.67151	0.392077
Vmn2r79	1.94856	0.00724815	0.125267	3.26219	0.431941
Myrip	1.8891	0.00726375	0.125454	7.88003	2.26715
Ccdc170	1.86277	0.00728168	0.125682	8.63154	2.08733
LOC108168393	1.9451	0.00729215	0.12578	5.16353	0.874871
Csf3r	-1.96804	0.00735117	0.126439	3.99636	19.7767
D730001G18Rik	1.84984	0.00734701	0.126439	2.75001	0.404116
Dcaf12l2	1.93717	0.00735914	0.126439	4.93167	1.03087
Lrrc17	1.9377	0.00735817	0.126439	4.70278	0.770377
Otud7a	1.76832	0.00735215	0.126439	13.857	3.82062
Vwa3b	1.80766	0.00733996	0.126439	12.5364	3.24483
Gm4835	-1.83348	0.00736832	0.126514	2.21587	8.92372
Ddah1	1.90738	0.00738287	0.126568	6.95898	1.55488
Enkur	1.79381	0.0073829	0.126568	12.9234	3.25185
Ppfia3	1.59611	0.00738588	0.126568	25.6277	7.71812
Ccr4	1.84825	0.00739181	0.126588	2.7071	0.443447
Rgl3	-1.48604	0.00744183	0.127362	13.3667	35.6844
Tril	1.80821	0.00744808	0.127386	11.8519	2.75478
1500009C09Rik	-1.86376	0.00747158	0.127705	0.928997	4.42183
6430573P05Rik	1.77697	0.00748767	0.127897	13.1201	3.56365
Ogn	1.9227	0.00751847	0.128257	4.36283	0.784068
Piwil1	1.91467	0.00751787	0.128257	7.63446	1.56738
Wnt10b	1.93928	0.0075433	0.128597	4.82847	0.669457
AU022754	1.92697	0.00755718	0.128751	6.76636	1.19182
Sh3rf3	1.85602	0.00756874	0.128864	8.91341	2.12979
Foxe3	1.91855	0.00757668	0.128916	6.55982	1.33346
1500011B03Rik	1.79683	0.00758826	0.12903	12.3958	2.59436
Sytl3	1.41346	0.00761101	0.129333	56.3381	21.4189
Ccdc42	1.9237	0.00764695	0.129777	3.90953	0.54857
Tro	1.93411	0.00764695	0.129777	3.92017	0.536552
Cyp2w1	1.92018	0.00766193	0.129947	6.69788	1.40047
Crb2	1.91005	0.00767382	0.130065	7.3189	1.27796
Aqp9	1.92765	0.00769927	0.130329	5.07859	1.16451
Rnf152	1.34292	0.00769677	0.130329	90.2247	35.8876
Asgr1	1.91424	0.00779702	0.131854	3.95385	0.527211
Hs3st1	-1.31797	0.00781264	0.131854	43.5834	113.113
Hsf4	1.79799	0.00780919	0.131854	12.316	3.22262
Impa2	1.63928	0.00780796	0.131854	20.7318	6.09605
Sqle	-1.3552	0.00781441	0.131854	32.8002	82.2163
Gm45620	1.92797	0.0078242	0.131935	5.53553	0.910759
Abcc8	1.76905	0.00784333	0.132089	67.7175	19.5389
Sstr2	1.85397	0.00783938	0.132089	9.04966	1.9471
Thbs1	-1.78978	0.00788593	0.132721	40.4011	135.061
Erlin1	1.33468	0.00792612	0.133313	97.3577	38.0995
Prss3	-1.80146	0.00794121	0.133481	0.55036	2.8637
Cntnap2	1.54636	0.00795229	0.133509	30.3466	10.1362
Gm26536	1.90913	0.00795463	0.133509	4.01825	0.638251
Pdia5	1.58894	0.00795805	0.133509	23.2343	7.37131
Syt8	-1.28275	0.00796573	0.133553	83.6689	202.361
1700017B05Rik	-1.29771	0.00801034	0.134215	59.761	148.052
Glb1l2	1.64175	0.00803497	0.134399	19.3571	6.54355
Npas1	1.82065	0.00803663	0.134399	11.049	2.79951
Serpinb6a	-1.35536	0.00803345	0.134399	28.9562	77.1199
Marcks	-1.30217	0.00808847	0.135181	54.7826	136.984
Gm26800	1.91213	0.00811878	0.135601	4.6343	0.808163
Myo1g	-1.67659	0.00817993	0.13645	5.40838	16.5812
Tceal9	1.52998	0.008175	0.13645	27.3529	9.16338
Ccne2	1.74935	0.00818714	0.136483	12.7887	3.28748
5730420D15Rik	1.89632	0.00822683	0.137058	3.75583	0.589003
Ppp1r3d	1.75014	0.00823501	0.137108	13.1469	3.43271
Armh1	1.90523	0.00824898	0.137254	6.45752	1.16459
Hist1h4f	1.86854	0.00827038	0.137447	6.1492	1.52063
Zfp651	1.82944	0.00827101	0.137447	10.5324	2.6236
Krt87	-1.83882	0.00828465	0.137522	1.66805	6.82877
Tubb3	1.7881	0.00828596	0.137522	11.9513	3.05801
Myo15b	-1.29283	0.00829908	0.137644	63.0167	155.797
Rps21	-1.30779	0.00830378	0.137644	46.9947	122.748
2310016G11Rik	1.89972	0.00832497	0.137909	6.37291	1.26963
Slc26a10	1.67154	0.00834712	0.138189	18.2652	5.28602
Angptl6	1.77335	0.00836246	0.138201	12.8573	3.26805
Mrnip	1.9043	0.00835342	0.138201	6.74552	1.19889
Rprl2	-1.79795	0.0083636	0.138201	0.462507	3.07548
Bmp2	1.46662	0.00837084	0.138234	38.3138	13.17
Parvb	1.82865	0.00837747	0.138257	9.67272	2.07268
Rhof	-1.55987	0.00842857	0.139013	9.12786	23.6354
Polr3gl	1.78107	0.00843762	0.139076	10.9531	2.80174
Gm14634	1.90991	0.00846259	0.139313	5.0382	0.750637
Klk13	1.90526	0.00846114	0.139313	6.64576	1.05517
1700039I01Rik	1.92509	0.00869024	0.139404	2.42941	0.220328
1700045H11Rik	1.83395	0.00869024	0.139404	2.02314	0.220328
2700069I18Rik	1.91363	0.00869024	0.139404	2.33465	0.202157
Accsl	1.9181	0.00869024	0.139404	2.37147	0.192873
Acr	1.87989	0.00869024	0.139404	2.09576	0.14296
Cby3	1.94216	0.00869024	0.139404	2.42949	0.14296
Ccdc113	1.84168	0.00869024	0.139404	2.07214	0.190609
Cyp2f2	1.83564	0.00868346	0.139404	9.37737	2.34243
Ddn	1.79972	0.00863554	0.139404	10.0505	2.87137
Gimap7	-1.83886	0.00868221	0.139404	1.08218	5.14523
Gm10748	1.83498	0.00869024	0.139404	2.14445	0.249253
Gm11372	1.8288	0.00869024	0.139404	2.08066	0.213532
Gm12689	1.92244	0.00869024	0.139404	2.59686	0.345822
Gm13561	1.78146	0.00869024	0.139404	1.92768	0.249253
Gm13651	1.70655	0.00869024	0.139404	1.72325	0.192873
Gm13783	1.87345	0.00869024	0.139404	2.0709	0.151185
Gm15583	1.88448	0.00869024	0.139404	2.21124	0.202157
Gm26849	1.88085	0.00869024	0.139404	2.24686	0.213532
Gm34267	1.80842	0.00869024	0.139404	1.99506	0.255458
Gm35986	1.89526	0.00869024	0.139404	2.43817	0.378849
Gm4746	1.90878	0.00869024	0.139404	2.2955	0.14296
Gm4863	1.87293	0.00869024	0.139404	2.47951	0.378849
Gm5133	1.83423	0.00869024	0.139404	2.22308	0.345822
Gsdma3	1.98164	0.00869024	0.139404	2.57846	0.151185
H2-Aa	-1.83105	0.00857156	0.139404	13.7689	51.2616
H2-T3	1.84862	0.00869024	0.139404	2.00475	0.133701
Hist1h4j	1.83377	0.00869024	0.139404	1.92968	0.133701
Itga3	-1.26589	0.00867527	0.139404	105.354	256.349
Krt16	-1.76499	0.00867278	0.139404	0.69285	3.26237
Krt39	1.80151	0.00869024	0.139404	2.00508	0.213532
Lyzl4	1.97001	0.00869024	0.139404	2.59787	0.18992
Mesp2	1.90386	0.00861586	0.139404	5.66795	1.15632
Ms4a3	1.80012	0.00858895	0.139404	2.53606	0.430609
Olfr223	1.85088	0.00869024	0.139404	2.07101	0.21597
Olfr761	1.97521	0.00869024	0.139404	2.59699	0.21597
Pitpnm3	1.57088	0.00853821	0.139404	25.4146	8.13404
Shisa5	-1.26377	0.00864921	0.139404	109.104	268.073
Tes3-ps	1.73106	0.00869024	0.139404	1.65911	0.190585
Th	2.00523	0.00869024	0.139404	2.61343	0.133701
Tmem252	1.86925	0.00869024	0.139404	2.22545	0.24129
Tnfrsf23	-1.431	0.00867393	0.139404	17.9978	47.1028
Zfp979	-1.53075	0.00859262	0.139404	10.0164	28.1609
LOC102636563	1.54205	0.0087238	0.139857	30.4656	9.78883
Pitpnc1	-1.41274	0.00874503	0.140112	17.8675	49.6256
B3gnt6	1.8568	0.00881655	0.141172	7.1983	1.58863
Aadac	-1.90536	0.00884257	0.141503	6.39998	25.9099
Prph	1.89452	0.00889031	0.14218	4.81029	0.879962
Hkdc1	-1.60531	0.00896376	0.143268	5.58902	19.3125
Ccdc92b	1.72537	0.00898352	0.143497	14.3967	4.13646
4930578C19Rik	1.87158	0.00899089	0.143527	3.63741	0.516494
Gm15595	-1.8063	0.0090003	0.143591	1.39799	7.68211
A930016O22Rik	1.85077	0.00900995	0.143658	7.65459	2.0036
Bag3	-1.30609	0.00903032	0.143896	45.8458	116.745
Myl4	1.89564	0.00909656	0.144863	5.64561	0.957709
Hlx	1.83881	0.00911925	0.144962	8.63985	2.10039
St8sia5	1.88651	0.00911777	0.144962	6.64031	1.13412
Tmem151b	1.68288	0.0091153	0.144962	16.1816	4.63597
Gas1	1.72224	0.00916744	0.145326	13.5413	3.38557
Mppe1	1.51883	0.00915419	0.145326	31.0335	9.64049
Pik3ap1	-1.52733	0.00916972	0.145326	8.897	26.3756
Sarm1	1.83345	0.00916852	0.145326	9.12182	1.71519
Tsks	1.84621	0.00914869	0.145326	7.42676	1.85252
Selenop	1.23188	0.00917771	0.145365	1326.18	564.312
Rcor2	1.77704	0.00928824	0.147027	10.892	2.98457
Gabrd	1.88112	0.00931103	0.147123	4.68581	0.81072
Olfml2a	1.87291	0.00930936	0.147123	6.33697	1.41529
Tusc1	1.64104	0.00930439	0.147123	19.8292	5.83908
Gm5842	-1.80558	0.00932339	0.14723	1.39025	6.62381
Mug1	-1.84185	0.00937547	0.147964	15.0679	60.448
Ankrd53	1.83063	0.0094813	0.149545	8.2617	2.05551
Trim17	1.85126	0.00949281	0.149637	6.58052	1.57142
Slc8a2	1.80313	0.00950264	0.149676	9.89775	2.37662
Smoc2	1.87922	0.00950669	0.149676	5.09565	0.802735
Dusp19	1.74629	0.00952619	0.149894	10.9036	2.71795
Gm9353	1.8622	0.00955818	0.150308	6.15822	1.43453
Cacng4	1.77062	0.00959026	0.150722	10.8315	2.96632
Col2a1	1.77694	0.00961198	0.150884	10.9018	2.45603
Gm1043	1.86006	0.00961182	0.150884	4.35583	1.08972
1810010H24Rik	1.7627	0.00967325	0.151215	11.3935	2.80528
4933406C10Rik	1.85661	0.00964391	0.151215	5.90944	1.50929
Arg1	-1.7985	0.00964847	0.151215	1.67566	6.86084
Gm14480	-1.73829	0.00967037	0.151215	0.423719	2.52298
Gm15372	-1.70009	0.00967037	0.151215	0.44892	2.24839
Gm17212	-1.68124	0.00967037	0.151215	0.401749	2.14629
Olfr1165-ps	-1.76902	0.00967037	0.151215	0.281482	2.37065
2610035F20Rik	1.87068	0.00972822	0.151984	6.58084	1.21638
Gm9816	1.87797	0.00974842	0.152195	4.80946	0.90024
Kcnh1	1.80698	0.00975906	0.152195	9.03926	2.48746
Ppp4r3c-ps	1.86946	0.00975391	0.152195	5.28457	1.01052
Racgap1	1.65044	0.00980866	0.152878	17.5959	5.63837
1600029O15Rik	1.86612	0.00991857	0.153053	3.14059	0.559354
4930469K13Rik	1.82057	0.00991857	0.153053	2.68151	0.324286
Arhgap33os	1.8277	0.00991857	0.153053	2.8703	0.448331
Arhgef15	1.82302	0.00991459	0.153053	8.48854	2.04274
Btnl2	1.84974	0.00991857	0.153053	2.67443	0.294145
Cd300lb	1.81843	0.00991857	0.153053	2.85301	0.530034
Cyp2e1	1.79643	0.00991857	0.153053	2.73774	0.434163
Gm16938	1.9155	0.00991857	0.153053	3.26037	0.392534
Gm7418	1.82516	0.00991857	0.153053	2.89486	0.44803
Metrnl	1.72583	0.00990087	0.153053	12.0947	3.50816
Mir6417	1.80424	0.00991857	0.153053	2.83942	0.45141
Pla2g4f	1.94113	0.00991857	0.153053	3.22215	0.323621
Spag8	1.86316	0.00991857	0.153053	3.18414	0.462785
Tarm1	1.92677	0.00991857	0.153053	3.4924	0.454822
Tex22	1.79682	0.00991857	0.153053	2.69512	0.39503
Tnfsf4	1.86717	0.00983838	0.153053	5.01546	0.890273
Trdc	1.92128	0.00991857	0.153053	3.36381	0.415688
Slc6a11	1.79135	0.0099431	0.153341	9.75984	2.65477
Srcin1	1.49739	0.00996354	0.153567	33.961	11.0301
Ggt6	1.65027	0.00997202	0.153608	16.2839	4.85393
Adgrg4	-1.74507	0.00998821	0.153767	14.0302	44.1099
Calr3	1.84285	0.0100718	0.154783	3.94632	0.797366
Mogat1	1.85971	0.0100603	0.154783	5.24282	1.20338
Pecr	1.82783	0.010069	0.154783	5.88439	1.63759
Gm6304	1.84754	0.0101045	0.154923	3.59761	0.543719
Sbk2	1.93498	0.0101045	0.154923	4.44142	0.646934
Tcf15	1.87464	0.0101045	0.154923	4.24877	0.812024
Zfp114	1.93198	0.0101045	0.154923	3.92919	0.427847
Gm29683	1.87018	0.010196	0.156235	5.67414	1.01095
Tespa1	1.83311	0.0102507	0.156983	3.50819	0.567956
Rtn4	-1.28529	0.0102579	0.157001	57.4753	141.471
Celf5	1.71187	0.0102702	0.157099	12.9859	3.73214
D330025C20Rik	1.8448	0.0102859	0.157248	7.24765	1.50907
Fev	1.83425	0.0102973	0.157331	7.97545	1.59312
Mcpt1	-1.70763	0.0103607	0.158208	35.3849	115.108
Tgfb1i1	1.8383	0.0104068	0.158819	6.94018	1.46619
Id4	1.83986	0.0104246	0.159	6.79166	1.39377
C630004L07Rik	1.74466	0.0104342	0.159053	2.40034	0.445378
Cacna2d4	1.59264	0.0104538	0.15926	21.3616	6.73365
Gm15610	-1.79279	0.0104951	0.159798	0.727281	4.1263
Abcc9	1.68507	0.0105103	0.159937	15.4868	4.14521
Trim52	1.83739	0.0105193	0.159981	7.61583	2.19693
2810468N07Rik	-1.74506	0.010559	0.160439	2.95494	8.72752
Foxi3	1.86245	0.0105616	0.160439	5.91554	1.27871
Gm18227	1.82771	0.0105818	0.160653	3.69809	0.6927
Myo18b	1.75601	0.0105942	0.160749	10.8478	2.72741
Prss36	1.75313	0.0106136	0.160951	10.5271	2.81364
Gdnf	1.8548	0.0106471	0.161325	5.23825	0.920016
Gm19950	1.8197	0.0106505	0.161325	7.33492	1.65413
Grik3	1.70873	0.01067	0.161527	14.4048	4.11036
Catsperb	-1.5624	0.0106795	0.161578	6.80207	22.1722
Npas2	1.33696	0.0106997	0.161622	79.0536	30.2989
Tm4sf5	-1.47119	0.0106894	0.161622	10.9454	30.3187
Trnp1	1.79455	0.0107008	0.161622	9.29571	2.38845
B4galt3	-1.26659	0.0107364	0.162031	77.7477	187.622
Otc	1.8354	0.0107402	0.162031	7.24903	1.42737
Tspan3	1.425	0.0107475	0.162049	43.3121	15.1305
Scara3	-1.60394	0.0107726	0.162334	32.3924	102.231
Gm16559	-1.59431	0.0108054	0.162736	6.02421	17.9185
Gm17777	-1.75171	0.0108188	0.162752	0.598836	3.44217
Plpp7	1.8151	0.0108177	0.162752	6.90044	1.40511
Pmepa1	-1.24358	0.0108522	0.163161	144.44	345.175
4930562F17Rik	-1.75556	0.0109531	0.163559	0.0711069	1.6085
Gm12814	-1.66388	0.0109531	0.163559	0.29659	1.67073
Gm15191	-1.74749	0.0109531	0.163559	0.159094	1.88837
Gm21276	-1.75612	0.0109531	0.163559	0.105419	1.75544
Gm29087	-1.71128	0.0109531	0.163559	0.159094	1.74288
Gm45651	-1.6794	0.0109531	0.163559	0.228725	1.72843
Hspe1-ps3	-1.62772	0.0109531	0.163559	0.217806	1.49172
LOC108167619	-1.73852	0.0109531	0.163559	0.135958	1.86773
Mup6	-1.69371	0.0109531	0.163559	0.159094	1.64395
Olfr1464-ps1	-1.66609	0.0109531	0.163559	0.105419	1.4644
Spdye4a	1.84855	0.0109055	0.163559	5.24602	0.956356
Vmn1r46	-1.64547	0.0109531	0.163559	0.263307	1.60933
Rbm46os	1.84001	0.0110112	0.164332	4.65435	0.840718
Hoxc6	1.72716	0.0110726	0.165156	12.4654	3.2335
Crocc2	1.78383	0.0111264	0.165865	8.67593	2.06679
Pcdhb11	1.82849	0.0111333	0.165874	4.73082	0.924172
2810407A14Rik	1.83556	0.0111399	0.165877	4.49579	0.833776
Fut2	-1.27094	0.0111819	0.166409	65.3455	160.643
1700001K19Rik	1.66043	0.0118366	0.16687	1.34968	0
4930532M18Rik	1.62241	0.0118366	0.16687	1.07995	0
4930555M17Rik	1.55852	0.0118366	0.16687	0.957055	0
4930593C16Rik	1.62888	0.0118366	0.16687	1.19602	0
4933408N05Rik	1.62937	0.0118366	0.16687	1.10423	0
A730032A03Rik	1.65755	0.0118366	0.16687	1.29052	0
Abat	1.63372	0.0114811	0.16687	16.2846	5.40291
Ankdd1a	1.5394	0.0118366	0.16687	0.859701	0
Birc7	1.64163	0.0118366	0.16687	1.21648	0
Cdh22	1.70215	0.0116141	0.16687	12.4243	3.61275
Clca1	-1.77875	0.0116901	0.16687	379.239	1300.15
Crct1	1.65853	0.0118366	0.16687	1.20097	0
Defb19	1.58679	0.0118366	0.16687	1.07975	0
Ehhadh	1.37036	0.0115222	0.16687	52.8516	20.4662
Erich6b	1.6669	0.0118366	0.16687	1.24739	0
Espnl	1.7011	0.0117852	0.16687	12.7951	3.75902
Exoc3l	1.7906	0.0112276	0.16687	7.82148	1.98924
Gcgr	1.81496	0.0116621	0.16687	5.80837	1.46587
Gm10616	1.83061	0.0115464	0.16687	5.2346	1.25399
Gm10830	1.6017	0.0118366	0.16687	1.04196	0
Gm11446	1.65966	0.0118366	0.16687	1.22687	0
Gm11862	1.62001	0.0118366	0.16687	1.06932	0
Gm11919	1.54588	0.0118366	0.16687	0.864219	0
Gm12110	1.58943	0.0118366	0.16687	1.111	0
Gm12138	1.64355	0.0118366	0.16687	1.18208	0
Gm12250	1.61306	0.0118366	0.16687	1.05496	0
Gm12962	1.62332	0.0118366	0.16687	1.13012	0
Gm14022	1.65665	0.0118366	0.16687	1.2378	0
Gm14320	1.58826	0.0118366	0.16687	1.03431	0
Gm14373	1.79065	0.0113222	0.16687	7.72171	1.93445
Gm15043	1.60748	0.0118366	0.16687	1.06928	0
Gm15495	1.51881	0.0118366	0.16687	0.884276	0
Gm16271	1.65243	0.0118366	0.16687	1.1856	0
Gm16479	1.67242	0.0118366	0.16687	1.3022	0
Gm18100	1.53658	0.0118366	0.16687	0.987583	0
Gm18290	1.64886	0.0118366	0.16687	1.19623	0
Gm18451	1.59718	0.0118366	0.16687	1.03185	0
Gm21362	1.66017	0.0118366	0.16687	1.29933	0
Gm26634	1.78722	0.0118196	0.16687	3.32421	0.612542
Gm28071	1.52715	0.0118366	0.16687	0.81635	0
Gm28644	1.55763	0.0118366	0.16687	0.99358	0
Gm31479	1.58663	0.0118366	0.16687	0.983543	0
Gm33024	1.65372	0.0118366	0.16687	1.19796	0
Gm35611	1.6364	0.0118366	0.16687	1.19617	0
Gm38509	1.67966	0.0118366	0.16687	1.27925	0
Gm45521	1.67581	0.0118366	0.16687	1.35109	0
Gm4782	1.6236	0.0118366	0.16687	1.10372	0
Gm5361	1.66091	0.0118366	0.16687	1.30912	0
Gm5737	1.80432	0.0115119	0.16687	7.35919	1.69685
Gm5871	1.60112	0.0118366	0.16687	1.01781	0
Gm6881	1.64516	0.0118366	0.16687	1.29196	0
Gm7670	1.60694	0.0118366	0.16687	1.14074	0
Gm7774	1.61903	0.0118366	0.16687	1.12533	0
Gm8501	1.54493	0.0118366	0.16687	1.00399	0
Gm8540	1.63607	0.0118366	0.16687	1.13855	0
Gm8596	1.60306	0.0118366	0.16687	1.13036	0
Gm9399	1.63379	0.0118366	0.16687	1.17704	0
Hist2h3c2	1.82574	0.0116639	0.16687	5.14049	1.10373
Hoxd8	1.69512	0.0115978	0.16687	13.7778	3.92907
Hrh4	1.58255	0.0118366	0.16687	1.01842	0
Hsph1	-1.32835	0.0116569	0.16687	28.5786	76.8624
Klk1b23-ps	1.58562	0.0118366	0.16687	0.987548	0
LOC100861727	1.61211	0.0118366	0.16687	1.09414	0
LOC102636664	1.58728	0.0118366	0.16687	1.02033	0
LOC102637808	1.61856	0.0118366	0.16687	1.12424	0
LOC105244102	1.57645	0.0118366	0.16687	1.01496	0
LOC108167767	1.62775	0.0118366	0.16687	1.10061	0
Mir5128	1.6563	0.0118366	0.16687	1.24117	0
Morn5	1.6093	0.0118366	0.16687	1.05009	0
Mptx1	1.64277	0.0118366	0.16687	1.21953	0
Myh11	1.81966	0.0116341	0.16687	5.71146	1.26648
Odf4	1.56529	0.0118366	0.16687	0.910591	0
Olfr1138	1.49726	0.0118366	0.16687	0.807517	0
Olfr1427	1.61758	0.0118366	0.16687	1.16326	0
Olfr356	1.68817	0.0118366	0.16687	1.34368	0
Olfr643	1.56484	0.0118366	0.16687	0.90853	0
Olfr974	1.60077	0.0118366	0.16687	1.01213	0
Pbx4	1.78608	0.0118144	0.16687	8.10791	1.93817
Pgbd5	1.7564	0.0112881	0.16687	10.4603	2.66678
Plvap	1.7888	0.0116674	0.16687	8.2774	2.07156
Pramel3	1.59806	0.0118366	0.16687	1.0305	0
Prph2	1.72244	0.0118397	0.16687	11.7051	3.31174
Rps2-ps11	-1.78116	0.0114475	0.16687	1.64091	6.40822
Rtl8c	1.651	0.0118366	0.16687	1.21437	0
Sdr16c6	1.6601	0.0118366	0.16687	1.22678	0
Slc22a3	1.79397	0.0117856	0.16687	7.69202	2.20296
Slc6a4	1.79643	0.0112749	0.16687	8.03247	1.85502
Spdye4b	1.76473	0.0117905	0.16687	9.96469	2.52018
Spint3	1.56989	0.0118366	0.16687	0.91896	0
Tbc1d30	1.32772	0.0113592	0.16687	81.3624	32.1802
Tcl1	1.63354	0.0118366	0.16687	1.1859	0
Tgtp1	1.56215	0.0118366	0.16687	0.933694	0
Tmco5b	1.62811	0.0118366	0.16687	1.12713	0
Tmem229b-ps	1.62973	0.0118366	0.16687	1.22917	0
Tpx2	1.68224	0.011604	0.16687	11.3806	3.37632
Uts2r	1.62581	0.0118366	0.16687	1.1741	0
Vmn1r222	1.61734	0.0118366	0.16687	1.08859	0
Vmn1r-ps53	1.71425	0.0118366	0.16687	1.46825	0
Zar1l	1.61003	0.0118366	0.16687	1.03966	0
Slc24a3	1.80824	0.0118922	0.167521	6.75195	1.48674
Gnai2	-1.24295	0.0119068	0.167547	121.525	290.535
Kcng1	1.74217	0.0119021	0.167547	10.64	3.39287
Shank1	1.49347	0.0119383	0.167842	30.653	9.8576
Snhg3	-1.63566	0.0119405	0.167842	3.74211	14.0886
Cfb	-1.66622	0.0119482	0.16786	3.33472	12.2693
Wwp1	1.25435	0.0119785	0.168196	212.977	89.0121
Tubg2	1.82078	0.0119923	0.168302	4.96696	1.00947
Padi1	-1.59119	0.0120165	0.168551	5.61834	17.569
Kntc1	1.61058	0.0120231	0.168554	16.2302	5.24789
Qrich2	1.76727	0.0120876	0.169368	8.36585	2.11958
Cep112	1.5999	0.0120959	0.169394	18.7562	5.97741
Nkd1	1.75111	0.0121064	0.169452	8.95436	2.33348
Fzd2	1.74325	0.0121211	0.169566	10.3071	2.64237
BC001981	1.76088	0.0121361	0.169686	8.36577	2.44956
Hpgds	-1.48739	0.0121655	0.169963	10.3546	28.1452
Sod3	1.6689	0.0121688	0.169963	14.6718	4.06151
Tal2	1.82861	0.0121827	0.170067	5.83532	1.24233
1700026D11Rik	1.80154	0.0122609	0.170947	4.10471	0.870462
Pabpc6	1.80738	0.0122609	0.170947	4.25583	0.909609
Rnf138rt1	1.76515	0.0122652	0.170947	9.23381	2.58488
Filip1	1.80474	0.0123009	0.171355	4.03863	0.679512
Abhd14a	1.63781	0.0123262	0.171487	14.663	4.8341
Gm14200	-1.75909	0.01233	0.171487	1.06735	4.99736
Tmem86a	-1.57399	0.012319	0.171487	6.58365	17.7625
Def6	1.64801	0.0123566	0.171767	14.8587	3.92844
Mmp17	1.70615	0.0124176	0.172486	11.8652	3.05764
Tbx18	1.79055	0.0124214	0.172486	7.67138	1.6616
1700001O22Rik	1.71048	0.0126683	0.172849	11.2884	3.08082
1810020O05Rik	1.7244	0.012842	0.172849	2.04702	0.377705
2010106E10Rik	1.83702	0.012842	0.172849	2.32566	0.192873
2410022M11Rik	1.54308	0.0128397	0.172849	22.8943	7.14192
5430421F17Rik	1.79864	0.0127996	0.172849	4.5678	1.04732
Avp	1.7495	0.012842	0.172849	1.92125	0.192873
BC002189	1.69331	0.012842	0.172849	1.80548	0.377705
Bex4	1.69869	0.012842	0.172849	1.85721	0.345822
Bsph1	1.81205	0.012842	0.172849	2.2436	0.14296
C030048H21Rik	1.797	0.012842	0.172849	2.06967	0.190609
Cacng1	1.78389	0.012842	0.172849	1.98073	0.189319
Cd209b	1.74327	0.0125494	0.172849	10.1659	2.18256
Ceacam18	1.80187	0.012842	0.172849	2.38405	0.345822
Chat	-1.70129	0.0126942	0.172849	2.65545	9.28281
Cyp2j15-ps	1.82662	0.012842	0.172849	2.30749	0.18992
Dppa5a	1.67488	0.012842	0.172849	1.88405	0.24129
Efnb3	1.71056	0.0126825	0.172849	11.4096	3.08867
Egr4	1.80284	0.0127354	0.172849	6.12206	1.43238
F7	1.77	0.012842	0.172849	2.05126	0.202157
Fam217b	1.6259	0.0126157	0.172849	15.6143	4.47704
Fsip1	1.71146	0.012842	0.172849	1.78839	0.249253
Gm11732	1.76498	0.012842	0.172849	2.12576	0.245874
Gm11911	1.78584	0.012842	0.172849	2.00391	0.202157
Gm14207	1.81287	0.012572	0.172849	4.58345	0.910965
Gm14786	1.82995	0.012842	0.172849	2.32212	0.143281
Gm15939	1.69628	0.012842	0.172849	1.78881	0.24129
Gm16177	-1.66235	0.0125975	0.172849	0.464251	2.71959
Gm18384	1.73128	0.012842	0.172849	1.81084	0.189319
Gm21009	1.84937	0.012842	0.172849	2.18821	0.14296
Gm2479	1.75588	0.012842	0.172849	1.99477	0.21597
Gm3646	1.86035	0.012842	0.172849	2.19161	0.133701
Gm4211	1.77964	0.012842	0.172849	1.97473	0.14296
Gm4849	1.73668	0.012842	0.172849	1.99402	0.377705
Gm5096	1.7777	0.012842	0.172849	2.09974	0.21597
Gm5310	1.78955	0.012842	0.172849	2.01263	0.133701
Gm5912	1.75184	0.012842	0.172849	1.97538	0.255458
Gm6480	1.67255	0.012842	0.172849	1.66215	0.24129
Gm7609	1.83006	0.012842	0.172849	2.06112	0.133701
Gprin2	1.82965	0.012842	0.172849	2.22851	0.202157
Ifna2	1.71286	0.012842	0.172849	1.71237	0.190609
Kcnc4	1.76351	0.0127221	0.172849	7.76677	2.2025
Kcnk2	1.74254	0.0127583	0.172849	9.52846	2.68252
Kirrel2	1.7422	0.0127972	0.172849	10.9212	2.34243
Klhl38	1.75265	0.012842	0.172849	1.94265	0.151185
Klrb1b	1.85334	0.012842	0.172849	2.33743	0.151185
Liph	1.25032	0.012774	0.172849	214.659	89.6585
Lrrc72	1.80065	0.0126987	0.172849	4.85741	1.16783
Mir130c	1.67805	0.012842	0.172849	1.5724	0.14296
Mslnl	1.76073	0.012842	0.172849	2.04454	0.220328
Nps	1.81667	0.012842	0.172849	2.21955	0.190609
Rbpms2	1.89017	0.012842	0.172849	2.51905	0.18992
Sema4b	-1.23125	0.0126647	0.172849	167.883	398.498
Slc6a7	1.78484	0.0128476	0.172849	7.59985	1.60639
Smco3	1.9036	0.012842	0.172849	2.63542	0.21597
Stfa2l1	1.67655	0.012842	0.172849	1.76028	0.255458
Tnfsf13os	1.71947	0.0126478	0.172849	10.0117	2.61156
Tuba1c	-1.37465	0.0124826	0.172849	17.4001	49.6073
Txnrd2	1.51496	0.0128377	0.172849	23.9692	8.04657
Ubqln5	1.79417	0.012842	0.172849	2.04889	0.190609
Vwa3a	1.56163	0.0124687	0.172849	21.1524	6.80785
Zscan5b	1.78985	0.012842	0.172849	2.2226	0.378849
Sgpp1	1.3281	0.0128906	0.173339	71.9382	27.7899
Cyp2s1	1.44645	0.0129062	0.17346	194.982	70.6453
Gm10710	1.53511	0.0129396	0.173821	23.9495	7.08446
Hcn4	1.75602	0.0129492	0.173861	8.76169	2.04623
Slc6a20b	1.62146	0.0129668	0.174009	17.2285	5.3016
Cntfr	1.79936	0.0130724	0.175248	6.35835	1.53169
Gm17969	1.78974	0.0130683	0.175248	4.15102	0.748371
Amn	1.79668	0.0130955	0.175468	5.0494	1.28787
Arl5c	1.79501	0.0131719	0.176402	4.47776	0.791636
Cckbr	1.77126	0.0132104	0.176558	6.22621	2.10199
Chga	-1.91758	0.0132066	0.176558	22.5661	87.1962
LOC105246018	1.78597	0.0131982	0.176558	6.87876	1.60541
Spdef	1.29073	0.0131954	0.176558	103.478	42.48
Gxylt2	1.69174	0.0132209	0.176609	12.0212	3.3679
1700030F04Rik	1.76101	0.0133368	0.177528	3.44536	0.612803
3110082J24Rik	1.8704	0.0133368	0.177528	4.23659	0.629782
Gm32050	1.82022	0.0133368	0.177528	3.65565	0.514795
Gm7192	1.83293	0.0133368	0.177528	3.71443	0.484754
Gm8146	1.79151	0.0133368	0.177528	3.58095	0.585348
Mpl	1.79935	0.0133368	0.177528	3.60717	0.572783
Prodh2	1.80513	0.0133368	0.177528	3.60201	0.477759
LOC675947	1.79357	0.013346	0.177561	5.9956	1.20943
4930442P19Rik	1.77864	0.0135986	0.177902	2.88789	0.446043
4930547M16Rik	1.84307	0.0135986	0.177902	3.04514	0.333201
4931440P22Rik	1.62296	0.0134085	0.177902	15.7105	4.82513
8430422M14Rik	1.76877	0.0135986	0.177902	2.60298	0.333201
Ankrd39	1.47445	0.0136076	0.177902	30.1189	10.7786
Areg	-1.51348	0.0134148	0.177902	9.13673	24.5185
Aspg	1.73518	0.0135986	0.177902	2.52265	0.392475
Bex2	1.78283	0.0134596	0.177902	4.678	1.06471
C8b	1.74933	0.0135986	0.177902	2.71805	0.443447
CK137956	1.74937	0.0135986	0.177902	2.7498	0.466202
Cpa5	1.78837	0.0135986	0.177902	2.80495	0.353342
Cplx1	1.76599	0.0135986	0.177902	2.83757	0.520666
Cxcr3	1.70381	0.0135986	0.177902	2.67186	0.618995
Esp34	1.75354	0.0135527	0.177902	3.43356	0.9967
F930015N05Rik	1.79368	0.0134561	0.177902	5.24476	1.16192
G6pd2	1.68028	0.0135986	0.177902	2.36931	0.397059
Gm11833	1.70886	0.0135986	0.177902	2.45173	0.511406
Gm12703	1.71404	0.0135986	0.177902	2.576	0.490543
[truncated: 24,357 more rows]
