# Supplementary material for: Single-PanIN-seq unveils that ARID1A deficiency promotes pancreatic tumorigenesis by attenuating KRAS-induced senescence
Source: eLife. 2021 May 13;10:e64204. doi: 10.7554/eLife.64204 (PMC8203294; doi:10.7554/eLife.64204)
Supplement: Supplementary file 4. [file elife-64204-supp4.xlsx]

## Sheet: WT_vs_ARID1A_KO_clone1_Kras_int
Gene	logFC	unshrunk.logFC	logCPM	PValue	FDR
COL3A1	1.289	1.28905	9.48774	4.02e-16	3.18e-12
CXCL8	-1.67211	-1.67231	7.24809	5.42e-16	3.18e-12
MMP1	-2.59344	-2.60643	8.9089	1.41e-15	5.5e-12
HAS2	-2.09278	-2.09468	6.11391	1.42e-14	4.17e-11
CLU	6.68513	7.12946	6.01679	5.5e-14	1.14e-10
SERPINB2	-1.41384	-1.41417	7.49081	5.84e-14	1.14e-10
SYNPO2	1.90524	1.90668	6.59675	4.49e-13	7.52e-10
AKAP12	0.933591	0.933623	9.88513	1.16e-11	1.69e-08
ABCC3	2.39021	2.39589	4.81751	2.75e-11	3.59e-08
LOX	-1.09914	-1.09928	7.88814	6.29e-11	7.37e-08
PSD3	1.41191	1.4129	6.39002	1.75e-09	1.87e-06
UACA	0.988399	0.988526	7.50988	3.72e-09	3.64e-06
PAPPA	0.88688	0.886946	8.46636	4.61e-09	4.16e-06
FST	4.11511	4.16557	3.41235	6.15e-09	5.15e-06
ANKRD1	-1.22069	-1.22101	6.60733	7.7e-09	6.02e-06
MX1	-2.00656	-2.01072	5.6697	9.15e-09	6.21e-06
GFPT2	2.18043	2.18724	4.52665	9.29e-09	6.21e-06
DUSP5	-0.934599	-0.934756	7.51256	9.53e-09	6.21e-06
E2F7	-1.19399	-1.195	6.40165	1.95e-08	1.2e-05
MMP2	0.836072	0.836172	8.04823	2.3e-08	1.35e-05
CD248	0.942527	0.942695	7.63036	3.02e-08	1.68e-05
SLC2A13	1.17606	1.1773	7.07664	5.09e-08	2.71e-05
COL7A1	1.22949	1.2299	6.75825	5.71e-08	2.91e-05
IGFBP4	0.74288	0.742894	10.848	6.55e-08	3.2e-05
HTRA1	0.78898	0.789064	8.22379	9.16e-08	4.3e-05
CALD1	0.684257	0.68427	10.6161	1.28e-07	5.78e-05
IL11	1.54295	1.54633	5.51506	1.43e-07	6.22e-05
TRIM58	1.01908	1.01936	6.89496	3.09e-07	0.000128469
TPM1	0.735315	0.735354	9.23361	3.18e-07	0.000128469
COL1A1	0.749803	0.749829	10.6417	5.93e-07	0.000231845
TNC	2.04605	2.07038	6.198	6.33e-07	0.000239305
SRGN	-0.700021	-0.700056	9.18643	1.05e-06	0.000384588
ID1	-1.14371	-1.14433	5.63102	1.68e-06	0.000596846
OAS3	-1.72622	-1.72854	4.54243	1.83e-06	0.000631258
NNMT	0.826433	0.826552	7.80061	1.96e-06	0.000655089
COL6A3	0.610167	0.610175	11.8081	2.1e-06	0.000683382
PABPC1L	1.21614	1.21704	5.44391	2.3e-06	0.000728548
DUSP1	-0.723094	-0.723189	7.75698	2.47e-06	0.000760911
C1QTNF1	1.08036	1.08148	5.88762	2.57e-06	0.000772273
IGF2	-0.703028	-0.703064	9.53214	3.24e-06	0.00094834
TUBA1C	-0.764727	-0.764908	7.53762	3.68e-06	0.00103363
FIBCD1	2.39945	2.41238	3.41794	3.75e-06	0.00103363
ABCA1	1.42297	1.42494	4.96626	3.79e-06	0.00103363
PLXNA2	-1.28907	-1.28952	5.46895	5.02e-06	0.00133748
LMO4	0.879844	0.880269	6.54662	5.66e-06	0.0014731
COL5A2	0.652043	0.652081	9.08285	6.57e-06	0.00167341
ITGA1	0.793214	0.793444	7.13862	7.91e-06	0.00197323
ZFP36L1	-0.673653	-0.673722	8.27988	8.26e-06	0.0020163
SYNE1	0.707372	0.707523	7.74339	1.01e-05	0.00242331
FOXL1	-0.948839	-0.949298	6.10235	1.06e-05	0.00247291
LY6E	-0.780094	-0.780262	7.27373	1.09e-05	0.00247291
ST3GAL5	2.23061	2.25775	3.71698	1.1e-05	0.00247291
QPRT	2.36659	2.38565	3.20843	1.19e-05	0.00263979
NID2	0.599155	0.599201	9.54539	1.33e-05	0.00285466
OLAH	1.21262	1.21497	5.29806	1.34e-05	0.00285466
PROS1	1.10072	1.10242	5.61342	1.53e-05	0.00319084
PSAT1	0.78947	0.789879	7.56685	1.55e-05	0.00319084
PLAT	-0.572304	-0.572328	10.6172	1.65e-05	0.0033169
LAMB1	0.659142	0.659258	8.12747	1.69e-05	0.0033169
LAMA5	2.40848	2.44446	6.15852	1.7e-05	0.0033169
BCL6	-1.28429	-1.28612	4.80322	1.76e-05	0.00337505
CRISPLD2	0.761444	0.761615	7.40492	1.79e-05	0.00337505
FRMD3	-0.822777	-0.823238	6.62558	2.15e-05	0.00400012
MT-RNR1	-0.721413	-0.721454	9.03113	2.54e-05	0.00465375
OGFRL1	0.65489	0.654998	7.86191	3.14e-05	0.00566305
COL5A1	0.671499	0.671552	8.56642	3.49e-05	0.00619091
COL5A3	4.03237	4.18396	2.20166	3.74e-05	0.0064548
ATXN1	1.32156	1.32516	4.79575	3.77e-05	0.0064548
LTBP3	0.794876	0.794952	7.30471	3.8e-05	0.0064548
PPDPF	-0.678424	-0.678565	7.21519	5.02e-05	0.00841083
FDPS	0.790017	0.790292	6.57064	5.23e-05	0.00863949
VDR	0.824086	0.824462	6.46658	5.83e-05	0.00948417
TUBB4B	-0.586199	-0.586243	8.89245	6.07e-05	0.0097433
MYLK	1.00762	1.00824	5.33052	6.26e-05	0.0099089
PDGFRB	0.579053	0.579103	8.59567	7.09e-05	0.0110836
COL12A1	0.623635	0.623672	8.52989	7.25e-05	0.0111859
SLC5A12	-6.35908	-1.44269e+08	1.60748	7.66e-05	0.0116673
DDIT4	0.9512	0.951996	5.69993	7.9e-05	0.0118722
MYH9	0.57301	0.573015	12.0911	8.16e-05	0.0121067
MT-ND4	-0.92791	-0.927917	12.0016	8.56e-05	0.0125495
LUM	1.16776	1.17139	5.95346	8.91e-05	0.012677
ARHGAP29	-0.693217	-0.693474	7.06493	8.97e-05	0.012677
RPL27	-0.638065	-0.63812	8.45322	8.98e-05	0.012677
PLCB4	1.12822	1.12946	4.77888	0.00010809	0.0150837
CYP51A1	1.44416	1.4483	3.93167	0.000109468	0.0150963
FLNB	0.583648	0.583679	9.06192	0.000117482	0.0160131
DYNC2H1	0.755004	0.755269	6.45279	0.000130313	0.0175578
NBEAL1	0.898647	0.89909	6.02697	0.000134763	0.017951
GYPC	0.995147	0.996082	5.3214	0.00013718	0.0180677
CD83	-1.84647	-1.85665	3.53935	0.000143384	0.0183572
ITPR1	1.00009	1.00018	6.71043	0.000146388	0.0183572
TNFRSF19	1.44758	1.45027	4.177	0.000146529	0.0183572
IFI27	-3.82235	-3.9844	4.4787	0.000147317	0.0183572
ANGPTL4	-0.751944	-0.752178	6.64912	0.000148508	0.0183572
NRCAM	-0.882387	-0.885058	6.34733	0.000148774	0.0183572
USP18	-2.74034	-2.76052	2.39555	0.000158526	0.0193567
PDCD4	0.843165	0.843635	5.94181	0.000161079	0.0194656
ZKSCAN1	0.655914	0.656076	7.15602	0.000182859	0.021743
NOTCH3	0.587912	0.587962	8.70964	0.000184134	0.021743
IFI44	-0.965995	-0.9667	5.84973	0.000185489	0.021743
OBSL1	0.878555	0.879003	5.94432	0.000195966	0.0227437
PLEKHG4	0.813079	0.813509	5.95737	0.000198172	0.0227742
LMCD1	0.707393	0.70763	6.53357	0.000208137	0.0236872
PLAU	1.03242	1.03354	4.97473	0.000213035	0.0240115
IFIT3	-0.952549	-0.9532	5.31704	0.00021643	0.0241618
TUBB3	-1.34156	-1.34593	4.55407	0.000229656	0.0253965
PRSS23	0.604247	0.604275	7.53852	0.000236724	0.0259335
LSM3	-1.08214	-1.08322	5.01799	0.000245966	0.0266964
VCAN	0.710245	0.710675	7.30542	0.000255771	0.0275059
SLC7A5	0.568424	0.56852	8.73627	0.000262354	0.0279574
COL11A1	1.75661	1.76676	4.60681	0.000294849	0.0311371
CYR61	-0.525815	-0.525831	9.90453	0.000329258	0.0344604
ASNS	0.704434	0.704857	7.15796	0.000336747	0.0349323
NOG	1.22378	1.22501	4.67627	0.000360994	0.0368147
MYH10	0.841759	0.84252	5.62752	0.000361813	0.0368147
MT-RNR2	-0.548387	-0.548389	12.0031	0.000364316	0.0368147
TNFRSF12A	-0.548801	-0.548855	8.25205	0.000371691	0.0372389
C5AR2	-1.79136	-1.79791	3.27158	0.000391745	0.0387601
SERTAD2	-0.648697	-0.648892	7.03168	0.000396643	0.0387601
RAPGEF3	-1.21721	-1.22162	4.93291	0.000396794	0.0387601
LUC7L	0.875086	0.875752	5.33376	0.000409498	0.0396706
MT-ATP6	-0.89048	-0.890491	11.2325	0.000428213	0.0411435
LTBP4	0.682962	0.683284	6.51488	0.000433591	0.0413216
ALDH3B1	0.8018	0.802179	5.99556	0.000438856	0.041486
PBX3	-0.964762	-0.965775	4.88472	0.00044427	0.0415372
MT-ATP8	-0.86653	-0.866578	9.09355	0.000446484	0.0415372
ZFP36	-0.854117	-0.854723	5.44394	0.000453877	0.0418925
TGFBR2	-0.549241	-0.549275	8.73573	0.000462479	0.0422986
ID3	-0.704724	-0.704937	6.54579	0.000465675	0.0422986
TTC39B	0.729514	0.729832	6.71309	0.000471898	0.0422986
SSC5D	1.09441	1.09603	4.65856	0.000472711	0.0422986
H1F0	-0.600921	-0.601101	7.42726	0.000478104	0.0424571
CHAC1	1.17916	1.18349	5.42052	0.0004902	0.0429795
FLNA	0.484834	0.484841	11.6726	0.000494062	0.0429795
SP110	-1.00363	-1.00479	4.76774	0.000496604	0.0429795
RALGPS2	0.817383	0.819134	6.93555	0.000498653	0.0429795
TNFAIP2	0.68657	0.686799	6.56645	0.000509651	0.0436068
ARHGEF2	0.57573	0.57586	7.97702	0.000519115	0.0440947
S1PR1	-0.769692	-0.77053	6.78666	0.000532105	0.0448729
IFITM1	-1.52871	-1.52908	5.08192	0.000546645	0.045599
NAT14	1.05996	1.06132	4.65651	0.00055311	0.045599
KIF3C	0.669318	0.669561	6.38413	0.000556618	0.045599
ATM	0.621916	0.622162	7.73237	0.000558317	0.045599
DMBT1	1.29196	1.29672	3.98349	0.000563357	0.045599
AKAP9	0.593874	0.593993	7.27677	0.000567547	0.045599
PDE3A	1.93757	1.94735	2.82218	0.000576321	0.045599
ACAD10	1.16829	1.17041	4.12259	0.000581972	0.045599
S100A10	-0.691604	-0.692668	6.57339	0.000582045	0.045599
PSMD8	-0.588223	-0.588314	7.61613	0.000582941	0.045599
GREM1	0.489343	0.489351	10.6296	0.000583505	0.045599
ECI1	0.892039	0.892818	5.15441	0.000592973	0.046032
ITGA3	0.534948	0.534978	9.30394	0.000605043	0.04666
LURAP1L	1.07719	1.08105	5.91338	0.000614323	0.047066
IFIT1	-1.69825	-1.70026	4.07217	0.000641211	0.0487933
FADS3	0.548025	0.548114	8.08148	0.000645194	0.0487933
TUBA1B	-0.588167	-0.588255	8.427	0.000662641	0.0497915
SYNPO	0.748383	0.748642	6.05924	0.000678231	0.0506384
FXYD5	-0.662095	-0.662274	6.67739	0.000693071	0.0514188
CLN6	-1.18961	-1.19173	4.35721	0.000731006	0.053833
SLC4A11	-2.44137	-2.52966	4.07436	0.000734796	0.053833
MT-ND1	-0.761962	-0.761982	10.1059	0.000769918	0.0560558
HMGA2	-0.611366	-0.611605	7.57831	0.000781232	0.0565284
GCNT1	-0.787735	-0.788113	5.76748	0.000797471	0.0573494
RPSAP52	-2.33703	-2.41784	3.4411	0.000807532	0.0577188
SLC3A2	0.589236	0.589383	7.50701	0.000844212	0.0599749
ABL1	0.542752	0.542814	8.17843	0.000857686	0.060565
NRXN3	1.46106	1.47916	4.36597	0.000864579	0.0606862
DYNLRB1	-0.661702	-0.661939	6.44026	0.000872532	0.0608799
TFPI2	-0.643889	-0.644106	6.79018	0.000887314	0.061545
PHGDH	0.673319	0.673712	7.25979	0.000904284	0.0622072
MT-CO2	-0.7537	-0.753712	11.0174	0.000907476	0.0622072
MAPRE3	-1.487	-1.49374	3.97395	0.000918928	0.0623811
PDE4D	0.935879	0.937237	5.21172	0.000920656	0.0623811
CBS	-1.48309	-1.50439	5.24161	0.000945671	0.0628585
GABBR1	1.17935	1.18132	4.25122	0.000948219	0.0628585
SAMHD1	-0.703076	-0.703287	6.03407	0.000948455	0.0628585
HERC6	-0.992395	-0.993034	4.93425	0.000949151	0.0628585
MINAR1	2.31513	2.34059	2.12134	0.000978393	0.0644307
HSPA2	1.07856	1.0803	4.35277	0.000983884	0.0644307
JMY	1.06838	1.07239	4.9363	0.00100047	0.0646729
MT-CYB	-0.869174	-0.869192	10.5607	0.00100281	0.0646729
AASS	0.739884	0.74021	6.19891	0.00101098	0.0646729
C14orf132	0.836682	0.837349	5.29048	0.00101302	0.0646729
WNT5A-AS1	0.973346	0.974435	4.83173	0.00101841	0.0646729
KCTD12	0.92492	0.925828	4.88802	0.00102069	0.0646729
PNISR	0.589814	0.589961	7.02831	0.00102782	0.0647645
TNS3	-0.842465	-0.843293	5.45122	0.00103318	0.0647645
SAAL1	-1.19523	-1.1983	3.99823	0.00103963	0.064822
CSGALNACT1	0.565945	0.566056	7.47587	0.00106946	0.0661923
SEMA3C	0.607217	0.607442	7.1657	0.0010729	0.0661923
PSMD6-AS2	3.21664	3.29626	1.36555	0.00108147	0.066258
LSS	0.577396	0.577474	7.26761	0.00108527	0.066258
HIST1H2BK	-1.23595	-1.23867	4.21491	0.00110802	0.0672966
NES	0.980326	0.987293	5.54924	0.00111597	0.0674301
TAGLN	0.546965	0.547071	7.65144	0.00114129	0.0686063
SNHG3	-0.689033	-0.689348	6.02241	0.00114858	0.0686919
TNFAIP3	-0.980999	-0.982073	4.80445	0.00116172	0.0691256
OR2W3	1.20481	1.2074	4.09016	0.00119312	0.0706352
SLC6A9	1.29204	1.30132	4.72462	0.00121733	0.0717061
COL4A6	1.14232	1.14555	4.33673	0.00125243	0.0734048
SLC38A1	0.520895	0.521003	7.93297	0.00127623	0.0744279
PLPP4	-1.90267	-1.91728	2.53606	0.00130645	0.075813
GOLGA8A	0.857333	0.858058	5.14634	0.00132345	0.075824
IFIT2	-1.58557	-1.59191	3.03308	0.00132439	0.075824
C5orf30	-1.17168	-1.17335	4.65888	0.00132605	0.075824
ATP5MF	-0.876715	-0.877535	5.06125	0.00133481	0.0759547
GPR156	-5.97265	-144269485	0.795141	0.00136673	0.0770504
AZIN2	1.48392	1.49074	3.3532	0.00136721	0.0770504
PLPBP	-0.803655	-0.804301	5.25426	0.00137687	0.0772235
FHL1	1.19695	1.20036	4.07339	0.00139182	0.0776903
PATL1	-0.671429	-0.671715	6.2132	0.00140109	0.0778369
ZNRF3	-1.3701	-1.37401	3.52903	0.00142516	0.0784298
HTR1F	-2.60646	-2.637	2.07243	0.00142786	0.0784298
BAIAP2L1	0.909529	0.910568	4.78921	0.00143321	0.0784298
STARD4-AS1	1.75101	1.76508	3.25067	0.00144563	0.0784298
GALNT5	-0.540528	-0.540614	7.65607	0.00144978	0.0784298
TYMS	-0.961043	-0.962145	5.15534	0.00145191	0.0784298
CDKN1A	-0.466512	-0.466519	10.0134	0.00147249	0.0789172
HPCAL1	0.768849	0.769598	5.41016	0.0014744	0.0789172
KIF13B	0.894961	0.895884	4.98656	0.00149859	0.0797716
RPS27	-0.555874	-0.555946	7.86488	0.00150397	0.0797716
OPN3	0.916586	0.917583	4.88364	0.00153534	0.0807156
KRT81	3.35911	3.46298	0.924759	0.00153554	0.0807156
PIK3CD	0.625313	0.625522	6.41343	0.00157597	0.0824712
FHL2	0.503115	0.503169	8.15074	0.00158556	0.0826039
LAMC1	0.466319	0.466332	9.98507	0.00159772	0.0828694
IRS2	-0.624385	-0.624634	6.56496	0.00166805	0.0857867
LAMA2	0.503842	0.503899	8.41318	0.0016686	0.0857867
HERC1	0.583225	0.583406	6.73846	0.00170273	0.0869951
BEX1	0.797396	0.797843	5.86128	0.00170695	0.0869951
KCNAB2	1.77792	1.79631	3.17931	0.00171447	0.087
FMN2	-0.84179	-0.842448	5.14115	0.00173936	0.0872123
WNT5A	0.464838	0.464847	10.5291	0.0017409	0.0872123
ADM	0.542101	0.542182	7.57256	0.00174097	0.0872123
IFITM2	-0.550694	-0.550731	8.17664	0.00175784	0.0876825
SMAD3	-0.640525	-0.640696	6.24263	0.00177496	0.0881612
MTCO1P12	-0.602609	-0.602668	8.37847	0.00178316	0.0881951
TJP2	-0.620359	-0.620589	6.82881	0.0018017	0.0887373
RAP1GAP2	0.525712	0.525798	7.5795	0.00183342	0.0896803
MX2	-3.34737	-3.44488	2.34895	0.00183614	0.0896803
SARDH	1.03861	1.04032	4.36999	0.00184879	0.0899235
ZMYND8	-0.60498	-0.605196	6.40657	0.00187589	0.0907909
PIKFYVE	0.61809	0.618305	6.66116	0.00188212	0.0907909
MT-ND2	-0.882075	-0.882101	9.95407	0.00191264	0.0917162
MTTP	1.72541	1.76729	7.33679	0.00191695	0.0917162
FAM133A	1.51404	1.5248	3.83931	0.00193625	0.0922629
ATP6V0E1	-0.559354	-0.559489	7.01558	0.00195599	0.0928262
LOXL1	0.493551	0.493601	8.21748	0.00204522	0.0966696
SERPING1	-0.604228	-0.604927	6.68525	0.00205907	0.0969333
MT-CO3	-0.657316	-0.657326	10.9729	0.00207322	0.0972089
HSPB6	0.532598	0.532676	7.45358	0.00211667	0.0983091
USP12	-0.69212	-0.692462	5.95101	0.00212267	0.0983091
MYD88	-0.885096	-0.885999	5.02092	0.00212268	0.0983091
ZNF185	1.4589	1.46703	3.62147	0.00213072	0.0983091
SVEP1	1.09698	1.09968	4.24104	0.00213861	0.0983091
SLAMF1	-4.04535	-4.2264	0.564289	0.00215247	0.098343
CYP1B1	1.9345	1.94602	2.8612	0.00215613	0.098343
DST	0.494329	0.494343	10.0806	0.00219617	0.0997811
IL7R	-1.82212	-1.89007	4.08009	0.00223697	0.101242
GPRIN1	-1.45751	-1.46278	3.18033	0.00229774	0.103593
SH3PXD2B	-0.945184	-0.946928	5.04959	0.00232319	0.104031
ANAPC2	0.820332	0.821117	5.11469	0.0023252	0.104031
TRIB3	0.714149	0.715771	6.6805	0.00238032	0.105711
IL32	-1.3348	-1.3429	3.8622	0.00238081	0.105711
CMTM8	-1.66737	-1.67453	2.9784	0.00240709	0.106475
SIX1	-1.22482	-1.22605	3.91479	0.00245147	0.107732
SEMA4B	0.960721	0.964591	4.70429	0.00246429	0.107732
C2CD2	-0.655013	-0.655208	6.67319	0.00246747	0.107732
VEGFC	-0.653021	-0.653341	6.01923	0.00248273	0.107732
RASSF4	-2.4589	-2.49105	1.88348	0.00249078	0.107732
ARSB	-0.660958	-0.661251	6.08985	0.00249134	0.107732
FBN1	0.449394	0.449399	11.0649	0.00250042	0.107732
SOD3	1.24553	1.25099	4.38158	0.00250902	0.107732
MAP2K3	-0.61173	-0.611958	6.34104	0.00253051	0.10815
CHMP2A	0.64044	0.640735	6.07462	0.00253721	0.10815
SCN9A	0.559268	0.559435	7.25791	0.0025487	0.108246
GSTM2	1.50764	1.51448	3.03757	0.00257876	0.108793
NBEAL2	1.16374	1.16612	4.01546	0.00258014	0.108793
CKB	-2.43698	-2.46579	2.03251	0.00261569	0.109829
TRIB2	1.19376	1.19738	3.98129	0.00263712	0.109829
APOBEC3D	2.53042	2.5841	1.76217	0.0026399	0.109829
LRRN3	-1.86046	-1.87309	2.41412	0.00264218	0.109829
GALNT15	-0.863517	-0.866623	6.16529	0.00275588	0.11415
STK36	0.897692	0.898643	4.85023	0.00276911	0.114294
MICAL2	-0.50993	-0.509986	8.01456	0.0028104	0.115281
ALDH7A1	0.71184	0.712366	5.49431	0.0028127	0.115281
MYEOV	1.1043	1.11252	4.54799	0.00282958	0.115569
CYP2R1	1.37573	1.38112	3.49849	0.00292524	0.119061
AGTPBP1	0.70709	0.707598	5.44281	0.00294799	0.119572
TELO2	0.752348	0.753047	5.45951	0.00296755	0.11995
MT-CO1	-0.541433	-0.541436	12.389	0.00299306	0.120008
GDNF	-1.63406	-1.6448	3.05023	0.00299583	0.120008
TTTY14	2.37551	2.40222	1.79003	0.00299968	0.120008
GLIS1	0.912875	0.914072	4.53762	0.00305141	0.121662
XAF1	-0.899582	-0.900207	5.11637	0.00309957	0.123163
ALPK1	0.812839	0.814203	5.01667	0.00311757	0.12346
OLFML3	0.785373	0.785898	5.18072	0.00315513	0.124527
RPS27L	-0.553287	-0.553393	7.3252	0.00317527	0.124829
NEGR1	0.561005	0.561162	6.78739	0.00319361	0.124829
CUEDC2	0.708737	0.709211	5.507	0.00319475	0.124829
ATRX	0.517046	0.517135	7.46365	0.00324436	0.126347
SLC9A3R2	0.554652	0.554714	8.1032	0.00331589	0.128705
RPS6KA1	-2.33524	-2.39912	3.00959	0.00333301	0.128942
CAV1	-0.447534	-0.447542	9.94175	0.00335429	0.129339
SPOCD1	1.06422	1.06568	4.49347	0.0033991	0.130637
HS3ST3A1	0.816994	0.817886	4.8407	0.00342246	0.131105
HMGN2	-0.523831	-0.523905	7.49985	0.00346175	0.132178
RELA	-0.57947	-0.579656	6.55719	0.00351418	0.133744
HECTD1	0.481227	0.481275	8.45162	0.00355146	0.134726
KANK1	-0.757062	-0.757628	5.40858	0.00360303	0.136241
PTCSC3	2.69105	2.75978	1.50097	0.00364317	0.137316
MT-ND6	-0.587471	-0.587517	8.61858	0.00371184	0.139132
ZNF561	0.91693	0.918178	4.57132	0.0037151	0.139132
GOPC	0.542441	0.542578	6.87369	0.00373046	0.139263
ENPEP	0.742295	0.743619	5.2245	0.00377891	0.140623
MEIS1	0.675564	0.675996	5.59565	0.00379557	0.140796
MT1X	-1.47128	-1.47707	3.05403	0.00383263	0.141611
KCTD16	1.1106	1.11288	3.94903	0.00384168	0.141611
IKZF2	-1.30116	-1.30605	3.47098	0.00395203	0.145222
DDIT3	0.878674	0.881138	5.11959	0.00401215	0.14668
TUT1	1.58679	1.59452	2.89105	0.00401674	0.14668
MIR29B2CHG	1.24311	1.24694	3.52662	0.00404631	0.147301
CRISP3	-1.97296	-2.10554	6.44698	0.00407161	0.147763
DKK1	-0.841388	-0.842827	4.73747	0.00412998	0.148993
GRINA	-0.524253	-0.524346	7.35727	0.00413604	0.148993
ADGRB2	2.11667	2.15003	2.95007	0.00414364	0.148993
ADAMTS2	0.580913	0.581125	6.39579	0.00418902	0.150164
ALDH1L2	0.492093	0.492192	8.05728	0.00425383	0.152022
SH3RF1	-0.531973	-0.53209	7.08064	0.00429334	0.152968
NT5C2	-0.825629	-0.826526	4.85077	0.00432211	0.153527
CRIP2	1.5464	1.55584	3.27757	0.00435896	0.154032
RMC1	-0.79221	-0.79308	4.80926	0.00436261	0.154032
CHRNB1	-2.71701	-2.78072	1.38497	0.00440441	0.15504
PCLAF	-1.28803	-1.30319	4.42831	0.00443082	0.155103
LTBP1	-0.444495	-0.444514	9.08746	0.00443265	0.155103
ADAMTS1	0.44584	0.445878	8.93359	0.00462583	0.161381
ZNFX1	-0.55196	-0.552102	6.87138	0.0047721	0.16599
LINC01085	0.795501	0.798676	5.34489	0.00482465	0.167321
MRPS11	-0.908401	-0.909694	4.65888	0.00486176	0.167607
MT-ND3	-0.550182	-0.55022	8.66334	0.00486999	0.167607
GPAT3	1.04305	1.04652	3.99612	0.00488167	0.167607
ANK2	1.60066	1.62123	3.91616	0.00489517	0.167607
TIGD5	-1.1038	-1.10632	3.83688	0.00490438	0.167607
VPS13A	0.574427	0.574578	6.90101	0.00492438	0.167801
AK4	-0.663793	-0.664121	5.90249	0.00503138	0.17095
FAM107B	-0.489959	-0.490043	7.80005	0.00507029	0.171312
PTMS	0.526633	0.526686	8.72143	0.00507126	0.171312
ORC3	-0.853551	-0.854921	4.61688	0.00515311	0.173577
TP53I3	0.894841	0.896541	4.3887	0.0051766	0.173702
CD59	-0.43004	-0.43005	10.4613	0.00518648	0.173702
SCN8A	0.871245	0.872963	4.69228	0.00520177	0.173718
EDN1	1.04626	1.04755	4.09651	0.00526277	0.174718
ADGRG6	-0.64626	-0.64658	5.93297	0.00527466	0.174718
NDST1	0.472881	0.472918	8.59892	0.00527643	0.174718
RNF25	-0.881595	-0.882855	4.46327	0.00529662	0.174773
STRIP2	-1.51365	-1.52165	2.71897	0.00535314	0.174773
PRKG1	0.582084	0.582389	6.30603	0.00535627	0.174773
CCDC86	0.766754	0.767845	4.89949	0.00536045	0.174773
TLR4	-0.817572	-0.818509	4.95485	0.00536903	0.174773
MTCL1	0.651939	0.652378	5.67662	0.00537031	0.174773
HMGB1P5	-1.97789	-2.00534	2.15499	0.00539911	0.174773
C1orf115	2.2313	2.29189	2.45761	0.00540858	0.174773
MTHFD2	0.515435	0.515592	7.47366	0.00541227	0.174773
KLF11	-1.43736	-1.44232	3.27144	0.00545877	0.175249
ID2	-1.33636	-1.34025	3.2147	0.00549275	0.175249
PARP9	-0.739722	-0.740249	5.43337	0.00552895	0.175249
IGFBP5	1.18691	1.19667	4.78132	0.00553344	0.175249
RCCD1	0.957528	0.95984	4.33943	0.00553582	0.175249
RPS28P7	0.972284	0.97394	4.15777	0.00553859	0.175249
PM20D2	0.688615	0.689192	5.61922	0.00554607	0.175249
ZNF473	-1.47467	-1.48091	2.96513	0.00555702	0.175249
NQO1	0.485182	0.485223	7.68099	0.00556157	0.175249
SYTL2	0.684559	0.685079	5.45819	0.0056217	0.176669
ZNF33A	1.05266	1.05497	4.04719	0.0056527	0.177168
ZNF638	0.518477	0.51862	6.77876	0.00571252	0.178142
PRAF2	-0.876819	-0.877701	4.8725	0.00571418	0.178142
TNKS1BP1	0.534716	0.534799	7.7408	0.00575044	0.178798
GCC2	0.558394	0.558697	6.5104	0.00582178	0.180537
PPWD1	0.768395	0.769216	4.8468	0.005957	0.183776
BMPER	1.18958	1.19378	3.62317	0.0059576	0.183776
DNASE2	-0.700411	-0.700889	5.27211	0.00599697	0.184505
RXFP1	2.57856	2.641	1.34147	0.00603061	0.185054
SUSD5	-1.71768	-1.74113	2.79189	0.00610283	0.186345
TIPARP	-0.510906	-0.510984	7.60964	0.00610445	0.186345
HSPA5	0.429417	0.429423	10.3831	0.00612606	0.186518
DPF1	-1.74281	-1.75323	2.62606	0.00618784	0.187911
TUFT1	0.800246	0.80176	4.93897	0.00622708	0.188614
MASTL	-0.878994	-0.882032	4.6454	0.00630856	0.19059
ISG15	-0.670771	-0.670719	6.48903	0.00637886	0.191311
LRP4	1.10457	1.10731	3.72912	0.0063842	0.191311
PANK3	0.49024	0.490331	7.37467	0.00638765	0.191311
PSME2	-0.569289	-0.569476	6.55197	0.00640992	0.191311
FRA10AC1	0.801992	0.802958	4.8917	0.00642688	0.191311
COL18A1	0.626267	0.626533	6.29756	0.00643035	0.191311
NAP1L5	-0.729561	-0.730189	5.09828	0.00657003	0.194972
OCIAD2	-0.981668	-0.9833	4.12107	0.00660129	0.195405
GAS1	2.06103	2.11188	2.50638	0.00665503	0.196499
D2HGDH	0.84201	0.843066	4.53317	0.00667456	0.196581
SLC25A45	2.82229	2.89418	0.924	0.00669775	0.19677
LMOD1	2.25745	2.27951	2.02334	0.00672747	0.197148
DONSON	-0.752616	-0.753401	4.81815	0.00677011	0.197903
TMOD2	0.691248	0.692152	5.62238	0.00692617	0.201961
METTL14	0.78856	0.789429	4.82072	0.00696878	0.2027
CENPE	0.631366	0.632044	6.155	0.0070057	0.203269
KCNJ8	-1.42193	-1.42881	3.0284	0.00708711	0.204833
RELN	-1.07221	-1.07458	3.95161	0.00709455	0.204833
TUBB2B	-2.39485	-2.44234	1.37553	0.00718092	0.205571
IFIH1	-0.988801	-0.98989	4.77072	0.00718501	0.205571
PARD3B	0.738656	0.739378	5.26466	0.00718945	0.205571
ASH1L-AS1	-3.38741	-3.58117	0.779034	0.00719027	0.205571
TXLNGY	0.582935	0.583288	6.04464	0.00735085	0.209651
VPS13C	0.53677	0.536909	7.02068	0.0074279	0.211335
MPDU1	-0.724786	-0.725468	4.96252	0.00749654	0.212468
OAF	1.21722	1.23844	4.42057	0.00751839	0.212468
POLR2A	-0.459904	-0.459937	8.86333	0.00753593	0.212468
MEGF8	0.502071	0.502149	7.55929	0.00755777	0.212468
ALPK2	0.546951	0.547107	6.74446	0.00755837	0.212468
UBAP2L	-0.520175	-0.520266	7.39776	0.00760453	0.21299
HYI	1.30461	1.30965	3.6888	0.00761558	0.21299
TRIP11	0.518847	0.518961	6.87862	0.00763146	0.21299
ZNF277	0.868737	0.870633	4.27	0.00767058	0.213574
CEBPB	0.503809	0.503938	7.32864	0.00772984	0.214714
TXNDC17	-0.73432	-0.735156	4.88782	0.0077571	0.214962
TNNT1	2.67312	2.81873	1.756	0.00785319	0.217111
WDR27	0.945236	0.94697	4.05473	0.00790398	0.217698
MZF1	0.728231	0.729146	5.09729	0.00791805	0.217698
CYBRD1	-0.461718	-0.461792	7.65486	0.00793012	0.217698
LRRK2	0.536946	0.537238	7.01983	0.00801365	0.21947
KIAA0895L	0.888366	0.889888	4.22189	0.00803213	0.21947
ORAI3	0.845005	0.846775	4.41363	0.00806574	0.219876
C16orf74	1.18597	1.19063	3.3397	0.00810033	0.220307
SENP7	0.89168	0.893175	4.21329	0.00817777	0.221898
KDSR	-0.488924	-0.489021	7.19176	0.00836174	0.225859
ZNF444	0.73542	0.736014	5.18695	0.00838798	0.225859
HSPB8	-0.451169	-0.451229	7.85412	0.00839684	0.225859
HAUS1	-0.97719	-0.979353	4.15341	0.00841142	0.225859
FRG1BP	-1.03305	-1.0333	4.36361	0.00843011	0.225859
COL1A2	0.427199	0.427207	10.7556	0.00843937	0.225859
FBLIM1	0.511089	0.511233	6.77677	0.00850663	0.227141
TRMT6	-0.694681	-0.695335	4.99262	0.00859474	0.228972
FLRT2	0.507924	0.508068	7.53529	0.0086394	0.229269
GARS-DT	1.0917	1.09471	3.77467	0.00864501	0.229269
DSTN	0.431579	0.431613	8.72692	0.00870067	0.229459
PKIG	0.735197	0.735968	4.8974	0.00870946	0.229459
ATOH8	-1.57221	-1.5847	3.59718	0.00872381	0.229459
SLC20A1	-0.43285	-0.432882	8.5258	0.00873049	0.229459
SIM2	0.499625	0.499736	7.1652	0.00875091	0.229481
RCN3	-0.490346	-0.490407	7.80446	0.00885961	0.231546
MSS51	1.19547	1.21355	5.04553	0.00888991	0.231546
KLF15	2.36636	2.42288	2.63607	0.00890818	0.231546
COX6C	0.561829	0.562093	6.02364	0.00890867	0.231546
HSPA12A	0.646581	0.647073	5.52138	0.00898205	0.232595
ETNK1	0.535524	0.535721	6.51165	0.0090047	0.232595
FMNL1	3.41498	3.82983	1.28156	0.00901449	0.232595
IER5	0.478598	0.47866	8.34701	0.00905167	0.232595
DTX3L	-0.522479	-0.522616	6.5445	0.00907105	0.232595
FDFT1	0.457517	0.45758	7.65001	0.00908792	0.232595
CREBZF	0.518283	0.518454	6.50275	0.00908793	0.232595
FAM136A	-0.652451	-0.652923	5.38581	0.00911235	0.232712
EMILIN1	0.525827	0.525917	7.40124	0.00913552	0.232797
LARP6	0.500114	0.500363	6.77924	0.00924346	0.234563
CLDN12	-0.614114	-0.614417	5.8884	0.00924487	0.234563
NUTF2	-0.47396	-0.474061	7.23341	0.00928124	0.234978
CDK2AP1	-0.529365	-0.529541	6.4409	0.00937038	0.236723
KLHL24	-1.05118	-1.05443	4.30121	0.0094266	0.237607
GMNC	-1.87	-1.88905	2.21963	0.00944592	0.237607
PAWR	0.491127	0.491258	6.82905	0.00948337	0.237985
RFX3	1.50838	1.51816	2.57407	0.00950153	0.237985
STARD8	1.52621	1.53458	2.66643	0.00954765	0.23863
BUB1B	-0.875605	-0.879089	4.99876	0.00959984	0.239424
POLR1E	0.698879	0.699733	4.98298	0.00962989	0.239664
ZBED6	0.82531	0.826304	4.79565	0.00965273	0.239723
TOR1A	-0.560136	-0.560386	6.05439	0.00975448	0.241386
TPM2	0.465526	0.465546	9.61639	0.00976089	0.241386
DMXL2	0.614485	0.614855	5.66528	0.00988867	0.244032
ANKZF1	0.731041	0.73182	4.85765	0.0099556	0.245167
KIZ	0.881763	0.883798	4.59262	0.0100237	0.246326
CKS2	-0.727688	-0.728718	5.61381	0.010091	0.246568
LRFN4	-0.76657	-0.767343	4.83537	0.0100923	0.246568
ALDH1A1	-0.532438	-0.532698	7.30556	0.0100966	0.246568
SPRY4	-0.49103	-0.491121	7.04128	0.0101227	0.246692
POP1	0.961644	0.963748	4.2256	0.0101667	0.247249
PCK2	0.571735	0.572194	6.49109	0.010266	0.24868
GOLGB1	0.447904	0.44798	7.90976	0.010268	0.24868
MRPL14	-0.726042	-0.72685	4.81803	0.0102925	0.248759
IFITM3	-0.434605	-0.434626	8.96469	0.0103988	0.250581
MRPL20-AS1	1.06052	1.06321	3.63257	0.0104106	0.250581
PRRX1	-0.526718	-0.526838	6.32045	0.0104379	0.250722
CRCP	0.62696	0.627402	5.40756	0.0105899	0.253341
ABTB2	-1.8024	-1.82402	2.38108	0.0105901	0.253341
ARRDC3	-0.637562	-0.638327	5.46399	0.0106636	0.25458
CTXN1	2.12488	2.19718	1.84893	0.0107015	0.254965
SLC7A11	0.46547	0.465566	7.28407	0.0107313	0.255157
ANKRD35	-2.83704	-2.92297	1.59793	0.0107617	0.255361
UAP1	-0.469202	-0.469302	7.13989	0.0107855	0.25541
HTR1B	2.43795	2.49337	1.08211	0.0109011	0.256593
RAB36	-1.62623	-1.6416	2.45692	0.0109048	0.256593
LRP1B	3.03938	3.18565	1.17174	0.0109215	0.256593
FGF5	-0.475849	-0.476014	7.35256	0.0109448	0.256593
ASPM	0.600589	0.601343	7.09127	0.0109449	0.256593
PPIF	-0.446718	-0.44675	8.02281	0.0109795	0.25689
TMEM160	1.09668	1.1011	3.58993	0.0111138	0.259513
SCNN1D	1.53611	1.54304	2.79027	0.011208	0.261192
DIAPH3	0.576858	0.577655	6.3581	0.0112358	0.261321
ADAMTS5	1.42542	1.43334	2.60193	0.0112854	0.261541
KCNE4	0.572793	0.573053	6.07954	0.0112899	0.261541
LINC00622	2.08352	2.11536	1.54539	0.0113496	0.262287
SEMA3A	1.14876	1.16009	4.86689	0.0113674	0.262287
FAM167A	0.441594	0.441643	7.8699	0.0114055	0.262287
AR	0.786561	0.787534	4.61255	0.0114116	0.262287
ZFAND2A	1.14364	1.14718	3.34919	0.0114375	0.262369
CPTP	-0.673234	-0.67389	5.05323	0.0115425	0.264013
KLF5	-0.867174	-0.868621	4.21182	0.0115774	0.264013
RIN1	0.565866	0.566172	5.87347	0.0116213	0.264013
KRTAP2-3	-2.28498	-2.39431	2.55929	0.0116327	0.264013
MGA	0.821239	0.823229	4.35238	0.0116342	0.264013
C14orf28	1.40086	1.41077	2.73113	0.0116801	0.264013
FOSL1	-0.444109	-0.444169	8.03681	0.0116833	0.264013
RNF207	0.922168	0.92436	4.06695	0.0116894	0.264013
KIF20A	-0.947347	-0.953524	5.3968	0.0117205	0.264167
SFT2D1	-0.594525	-0.594934	5.49261	0.0117413	0.264167
C3orf52	-1.41893	-1.42841	2.6749	0.0118365	0.264629
PHF14	0.720806	0.721912	4.7589	0.011859	0.264629
SELENOW	-0.583485	-0.58376	5.90954	0.0118785	0.264629
GDF6	-1.5646	-1.57282	3.0617	0.0118831	0.264629
UPF3B	0.914425	0.916128	3.97626	0.0118862	0.264629
TFRC	-0.456679	-0.45684	7.67	0.0118972	0.264629
TK1	-0.596782	-0.597714	6.4528	0.0119922	0.265536
PPP1R13L	1.72838	1.76017	2.38579	0.0120198	0.265536
PFAS	0.606969	0.607658	5.41649	0.0120313	0.265536
TRIM14	-0.712615	-0.713412	4.84301	0.0120452	0.265536
TRIM16L	1.45149	1.46193	2.6399	0.0120513	0.265536
TFR2	-3.33291	-3.51878	0.877535	0.0121872	0.268017
RABIF	-1.03262	-1.03521	3.74016	0.0122096	0.268017
SLC25A3	0.422648	0.422674	9.01749	0.0123013	0.269524
RP9P	-1.31032	-1.31628	2.9297	0.0123413	0.269673
MT-ND4L	-0.473104	-0.473127	9.23326	0.012354	0.269673
EIF5A2	-1.16131	-1.16447	3.51654	0.0124629	0.271134
STUB1	0.56657	0.566876	5.83979	0.0124673	0.271134
SEL1L3	0.849241	0.857012	5.10133	0.0125177	0.271432
PTRH2	-1.11376	-1.11763	3.26429	0.0125273	0.271432
KCND1	2.39628	2.43868	1.32862	0.0125644	0.271575
HSPG2	0.41515	0.415162	11.3741	0.0125878	0.271575
RBSN	-0.574975	-0.57525	5.86493	0.0126034	0.271575
SLC28A3	-1.6167	-1.62858	2.27951	0.0126669	0.272443
SPON2	0.660811	0.661622	5.16411	0.0128589	0.275563
CHORDC1	0.601631	0.601976	5.70202	0.0128823	0.275563
FAM171B	0.495146	0.495653	8.11336	0.0128885	0.275563
VEGFA	0.516952	0.517263	6.4844	0.0129078	0.275563
POLR3GL	0.696644	0.69736	4.86565	0.0129416	0.275563
SNN	-1.93022	-1.95579	1.6937	0.0129672	0.275563
TUBB	-0.519242	-0.519381	7.30703	0.0129862	0.275563
COL10A1	-4.91766	-1.44269e+08	2.06224	0.01302	0.275563
LYST	0.953826	0.956406	4.13698	0.0130462	0.275563
INHBA	0.419889	0.419881	8.94804	0.013047	0.275563
SHISA2	-0.711982	-0.713307	5.53716	0.0131155	0.27651
ZNF669	-2.6912	-2.76331	0.925553	0.0131709	0.27718
SGK1	-0.845698	-0.846967	4.54942	0.0132356	0.277977
ADAM19	0.760101	0.760924	4.75238	0.0132651	0.277977
TEX30	-0.978085	-0.980683	3.73341	0.0132799	0.277977
PARP12	-0.6205	-0.620924	5.43696	0.0136814	0.28587
ADAMTSL5	0.673047	0.673967	4.86932	0.0138111	0.287736
RNF168	-0.605536	-0.606071	5.41979	0.0138198	0.287736
ACP7	2.48971	2.5927	1.52159	0.0138847	0.288575
NDUFAF2	-0.735943	-0.736814	4.69035	0.0139712	0.288705
H2AFJ	0.592503	0.592918	5.4551	0.0139922	0.288705
GYG1	-0.545877	-0.54613	6.27515	0.014021	0.288705
BRAT1	0.620766	0.621232	5.3326	0.0140245	0.288705
ZC3HC1	0.836553	0.838163	4.04878	0.0140382	0.288705
FGF2	0.48979	0.489918	6.8817	0.0140387	0.288705
EREG	0.473825	0.474177	8.171	0.0140984	0.28933
PRKACB	0.479229	0.479371	6.89179	0.0141185	0.28933
TMEM199	-1.43542	-1.44342	2.63012	0.0141505	0.289481
PHLPP2	-0.657847	-0.658416	5.16972	0.0142664	0.29111
PPFIBP2	1.05505	1.05809	3.40738	0.0142798	0.29111
CHFR	-0.604245	-0.604681	5.48042	0.0143288	0.291345
ABHD3	-0.988991	-0.990734	3.97726	0.0143411	0.291345
PKIA	-0.725336	-0.726379	4.93926	0.0144045	0.292127
BST1	-1.26883	-1.27447	2.94344	0.014446	0.292462
NUP107	0.615975	0.616502	5.28814	0.0145124	0.292978
IFI6	-0.585081	-0.583832	7.38733	0.0145214	0.292978
SPRY2	-0.590807	-0.591101	5.70412	0.0147012	0.295657
SEMA3F	1.44524	1.48426	4.17085	0.0147046	0.295657
PPP2R2C	-0.544113	-0.544463	5.96519	0.0147756	0.296574
EFNA5	-0.768355	-0.769217	4.50315	0.0149116	0.298792
CHD2	0.439148	0.439222	7.4956	0.014952	0.299091
GBA	-0.539625	-0.539883	5.86444	0.0149916	0.299373
FGFRL1	-0.755925	-0.757041	4.44564	0.0150418	0.299473
QPCT	-2.99031	-3.04616	1.46191	0.0150477	0.299473
IRS1	0.474259	0.474378	6.97397	0.0151656	0.301308
MAEA	0.525152	0.525384	6.20505	0.0152252	0.301378
CETN3	0.776982	0.778134	4.37979	0.0152518	0.301378
PGGHG	0.660316	0.660532	5.49753	0.0152561	0.301378
FEM1C	-0.511726	-0.511921	6.14623	0.015272	0.301378
ABCA5	0.759811	0.761241	4.57062	0.0153466	0.301805
LINC02407	-1.1868	-1.19164	3.07851	0.0153524	0.301805
ZNF189	-1.01625	-1.01919	3.58621	0.0153709	0.301805
RPL32	-0.411149	-0.411178	8.75106	0.0154893	0.303621
RAB30	0.85454	0.855889	4.20858	0.0155894	0.304841
KCND2	1.83544	1.85846	2.57643	0.0156035	0.304841
TESK1	-0.627415	-0.627982	5.0936	0.0156611	0.305054
MAP9	0.550093	0.550493	5.79514	0.0156665	0.305054
AHR	-0.479954	-0.480062	7.02591	0.015758	0.306327
EIF2AK2	-0.457161	-0.457209	7.58699	0.0158171	0.306968
TMEM126A	-0.79513	-0.796396	4.36223	0.015921	0.308472
FAR1	0.49772	0.497866	6.79619	0.015979	0.308832
ABI3BP	-1.23602	-1.24267	3.23842	0.0159923	0.308832
SH3RF3-AS1	2.83253	3.04599	1.13522	0.0160255	0.308965
MAD2L1	-0.777018	-0.778824	5.29706	0.0160792	0.309492
COL9A2	1.93572	1.96922	1.91872	0.0164108	0.315357
SLC9A3-AS1	0.758164	0.75925	4.4804	0.0164453	0.315501
PMS1	0.678789	0.679551	4.78479	0.0166691	0.319088
ZNF680	-1.82667	-1.84765	1.70307	0.0167065	0.319088
JOSD2	0.713106	0.713821	5.03129	0.0167167	0.319088
P4HTM	0.575646	0.576371	5.48202	0.0167769	0.319088
MRPL36	-0.751499	-0.752649	4.59006	0.0167877	0.319088
SLC4A3	2.02165	2.05221	1.46151	0.0167955	0.319088
CCDC18-AS1	0.832368	0.834448	4.56051	0.0171021	0.323887
VSIR	-0.656831	-0.65924	5.3205	0.0171034	0.323887
APOL1	-0.592318	-0.592469	5.39594	0.0171855	0.324916
ITPR2	0.51426	0.514586	6.29551	0.0172343	0.325314
ZNF486	-2.05183	-2.08406	1.3432	0.0173309	0.326613
COX7A2L	-0.465106	-0.465226	6.80301	0.0173794	0.327001
MT-TP	-1.26072	-1.26663	2.81132	0.0174725	0.328226
CEMIP	-1.27088	-1.28487	3.61925	0.0176283	0.330623
DAZAP2	-0.471608	-0.471736	6.87194	0.0176753	0.330974
HIST3H2A	2.68135	2.75186	0.982369	0.0178345	0.331633
SLCO3A1	2.40899	2.49743	1.42077	0.0178737	0.331633
TRMT112	0.485521	0.485685	6.49636	0.0178803	0.331633
UBE2E1	-0.5483	-0.548565	5.96282	0.0179268	0.331633
POMGNT2	-0.935283	-0.93779	3.80201	0.0179482	0.331633
TM4SF1	-0.412795	-0.412834	8.34014	0.0179532	0.331633
MCM5	-0.728903	-0.730267	5.85878	0.0179549	0.331633
TBX2-AS1	1.67144	1.70106	2.23582	0.0179588	0.331633
PIAS3	-0.489714	-0.489876	6.45213	0.0179935	0.331633
PLK4	-1.12644	-1.13955	4.34972	0.018015	0.331633
MYRF	1.24622	1.25972	3.0498	0.0180362	0.331633
DCTN3	-0.56193	-0.562265	5.63834	0.0180673	0.331633
ZNF721	0.886299	0.88806	3.97213	0.0180783	0.331633
HIST1H2BD	2.70239	2.84436	0.939421	0.0181564	0.332545
PHF11	-0.741728	-0.742682	4.57152	0.0182161	0.333118
C6orf132	-0.816515	-0.817784	4.33749	0.0182445	0.333119
RBM43	-1.10467	-1.10832	3.21044	0.0182765	0.333134
RAB5C	-0.567401	-0.567792	5.47103	0.0183022	0.333134
GNL3L	0.816914	0.818231	4.32695	0.0183685	0.333677
KIF18B	-0.979529	-0.985152	4.79963	0.018389	0.333677
PGM1	-0.493981	-0.494151	6.40791	0.0184576	0.334405
ACSS3	0.996928	1.00036	4.58754	0.0185796	0.335311
SOX4	1.88812	1.90833	1.94401	0.0185904	0.335311
DBH-AS1	1.9115	1.94639	1.79586	0.0185961	0.335311
NT5E	-0.396406	-0.396424	9.78058	0.0186221	0.335311
LINC01537	4.10463	1.44269e+08	1.19618	0.0187979	0.337147
LYSMD4	1.13704	1.14148	3.07179	0.0188019	0.337147
GBP3	-0.53293	-0.533234	5.84636	0.018813	0.337147
ZBTB1	0.563244	0.563623	5.56569	0.018839	0.337147
NR3C1	-0.455827	-0.455935	6.89279	0.0190421	0.340107
GPR176	-0.447464	-0.447535	7.55939	0.0190901	0.340107
PTPRS	-0.634483	-0.635853	5.10751	0.0190915	0.340107
SPRN	1.88054	1.90384	1.63704	0.0191757	0.341089
TGM2	0.389251	0.389291	9.31547	0.0192189	0.341339
BRWD3	0.687679	0.688429	5.18251	0.0192788	0.341886
TAF12	-0.70464	-0.705593	4.50158	0.0193256	0.342198
ATP7A	0.640151	0.640803	4.93263	0.019372	0.342502
ELOF1	-0.73596	-0.736804	4.72055	0.0194321	0.343046
HLCS	0.532236	0.532542	5.74049	0.0195329	0.343834
TSPAN6	-0.795397	-0.79669	4.27438	0.0195354	0.343834
LIN37	-2.32087	-2.3707	1.04052	0.0196858	0.345963
UNC119	-0.703618	-0.704464	4.66338	0.0197715	0.346948
PHLDB2	1.30933	1.31867	2.78044	0.019853	0.347858
ABCC4	-0.501426	-0.501737	5.94861	0.0198994	0.348151
MILR1	2.28981	2.35659	1.36298	0.0199796	0.349032
COL4A5	0.420174	0.420235	7.77196	0.0200867	0.349448
VPS51	0.513979	0.514221	6.04601	0.0200949	0.349448
MCRIP1	-0.924671	-0.9268	3.8145	0.0201052	0.349448
RBM6	0.497667	0.497867	6.22861	0.0201226	0.349448
DHRS3	-2.1204	-2.24442	2.54949	0.0202043	0.350347
ALKBH8	0.902227	0.904653	3.78635	0.0203551	0.351933
MN1	0.975384	0.995891	4.56198	0.0203558	0.351933
TNFRSF25	0.708749	0.709677	4.67511	0.0204212	0.352543
LYRM7	0.595163	0.595613	5.29269	0.0205937	0.354086
SSBP4	0.612598	0.613075	5.38961	0.0205996	0.354086
CELSR3	0.471125	0.471305	6.41498	0.0206011	0.354086
FEZ1	1.15823	1.17864	4.24771	0.0206618	0.354608
ATG4D	0.79327	0.794856	4.17618	0.0208195	0.356793
PHIP	0.441072	0.441168	7.05628	0.0209239	0.358058
ECM1	-0.434086	-0.434164	7.21089	0.0209735	0.358374
KBTBD4	1.59221	1.61001	2.05252	0.0210035	0.358374
RAD54B	-2.09988	-2.14143	1.43494	0.021109	0.359651
ASTE1	-1.2417	-1.24981	2.83577	0.0212259	0.360938
NCOA7	0.558593	0.559168	5.68547	0.0212619	0.360938
REC8	-1.19819	-1.20451	3.2691	0.0212769	0.360938
PSG2	-1.06902	-1.07358	3.327	0.0213219	0.361178
GSAP	0.803093	0.805318	4.35117	0.0216664	0.365966
SESN2	0.535547	0.536207	6.30887	0.021667	0.365966
ZMYM1	0.643349	0.644117	4.72931	0.021799	0.36733
SREK1	0.465466	0.465601	6.72512	0.0218257	0.36733
PLAC9	1.37124	1.38333	2.63971	0.0218417	0.36733
SMIM8	-1.66859	-1.68445	1.91845	0.021878	0.367412
INAFM1	0.7109	0.711784	4.63292	0.0221027	0.37016
CTIF	0.443804	0.443881	7.37509	0.022165	0.37016
ADAMTS6	0.437824	0.437914	7.25241	0.0221885	0.37016
SPATA18	1.33124	1.3377	3.48004	0.0221979	0.37016
ZNF137P	2.62549	2.70748	0.896472	0.0222199	0.37016
KIF11	0.656223	0.65788	5.95237	0.0222499	0.37016
CBR4	0.837066	0.83874	4.02653	0.0222627	0.37016
MFAP5	-0.861798	-0.866442	4.02804	0.022325	0.37067
CCDC188	1.52952	1.54089	2.3833	0.0223903	0.37123
ZNF724	4.25974	1.44269e+08	0.817548	0.0225056	0.372614
NSFL1C	-0.483139	-0.48334	6.16001	0.0227437	0.375243
TRPS1	0.677089	0.678068	5.32134	0.0227444	0.375243
MEMO1	1.5741	1.5854	2.29868	0.0227605	0.375243
PTGIR	0.593618	0.594115	5.37429	0.0230531	0.379534
IRAK3	-1.15487	-1.16089	3.5471	0.0231358	0.380362
FER	0.584816	0.585188	5.53056	0.0232008	0.380417
CSNK2A2	-0.481227	-0.481415	6.27932	0.0232041	0.380417
CSMD3	0.70932	0.711463	4.70639	0.0234051	0.382997
BIVM	0.621067	0.621655	5.09707	0.0234366	0.382997
MME	-0.568082	-0.568611	5.30842	0.0234595	0.382997
RRM2	-0.539186	-0.539697	7.13217	0.0236061	0.383868
MST1	2.27083	2.31692	1.17315	0.0236071	0.383868
TCF4	0.458594	0.458722	6.82315	0.0236395	0.383868
POPDC3	-0.657303	-0.658171	4.75143	0.0236473	0.383868
IPO5	0.386198	0.38622	9.04359	0.0236766	0.383868
PLEKHA4	-0.776464	-0.777696	4.30497	0.0238986	0.386435
LBH	1.74785	1.79159	2.37173	0.0239008	0.386435
ZNF300P1	1.60021	1.61656	1.85625	0.0240567	0.38842
FAM13B	0.572223	0.572699	5.22165	0.0241359	0.389162
ZNF839	0.798962	0.800524	3.94822	0.0242359	0.390238
TBC1D32	1.08961	1.09475	3.36177	0.0244248	0.392528
LINC01322	-1.17171	-1.17796	2.92428	0.0244763	0.392528
LAPTM4A	-0.414658	-0.414682	8.4953	0.0244786	0.392528
WDR19	0.622081	0.622723	4.91071	0.0245177	0.392618
TAF1A	1.09359	1.09796	3.0847	0.0246171	0.393672
SPEG	0.506313	0.506552	6.03184	0.0247307	0.39495
DRP2	2.21781	2.26257	1.37169	0.0247711	0.395057
MRTO4	-0.551642	-0.552013	5.55779	0.0249852	0.397806
PHYHD1	-1.59618	-1.60929	2.20965	0.0250113	0.397806
MT-ND5	-0.456671	-0.456681	10.4917	0.0250541	0.397854
SDC4	-0.40473	-0.404766	8.4892	0.0250867	0.397854
TLCD2	2.2541	2.31345	1.13332	0.0251162	0.397854
KAT7	-0.579243	-0.579724	5.19579	0.0251605	0.398018
NFKBIZ	-0.562115	-0.562696	5.44161	0.0252214	0.398443
SYNGR2	-0.573539	-0.573576	5.99167	0.0253235	0.399518
PLA2G15	-0.6114	-0.611961	5.04009	0.0254867	0.401553
TUBG1	-0.560056	-0.560478	5.44948	0.0255993	0.402785
ZNF10	1.64695	1.6633	1.8835	0.0257057	0.403835
ERVK3-1	-1.06314	-1.0671	3.18224	0.0257349	0.403835
PIGX	0.661877	0.662712	4.56837	0.0257695	0.403836
NRP2	0.514247	0.514738	5.88888	0.0258337	0.40394
FARP1	0.405533	0.405592	7.69392	0.0258768	0.40394
C5orf15	-0.475868	-0.476046	6.37646	0.0258985	0.40394
MT-TN	-1.09039	-1.09456	3.08814	0.0259139	0.40394
DNPH1	0.627907	0.628521	4.97514	0.0260941	0.406178
SERPINA9	-4.43548	-1.44269e+08	1.33727	0.0261268	0.406178
VEPH1	-0.476194	-0.476483	6.14471	0.0261769	0.406418
VCPKMT	1.21224	1.21869	2.63095	0.0262132	0.406443
LINC00886	-1.7778	-1.80515	1.84998	0.0263462	0.407966
RBAK	0.752377	0.753709	4.13064	0.0264081	0.408385
NFIL3	-0.457659	-0.4578	6.57452	0.0264918	0.40914
SNRPC	-0.55609	-0.556511	5.40664	0.0265591	0.40927
DBT	0.584995	0.585615	5.16151	0.0266013	0.40927
MIR155HG	3.21459	3.62666	0.766701	0.026605	0.40927
KDELR3	-0.451699	-0.451804	6.81708	0.0267832	0.411055
TSC2	0.460774	0.460929	6.48134	0.0267912	0.411055
TMEM99	-1.62132	-1.63637	2.12902	0.0268593	0.411111
HS6ST1	0.598232	0.598816	4.96084	0.026885	0.411111
ATP5PF	-0.574922	-0.575371	5.30574	0.0269	0.411111
NFKBIA	-0.546705	-0.547139	5.32042	0.0270555	0.411893
TDRD6	3.38549	3.78042	1.13017	0.0270646	0.411893
NUP155	-0.509419	-0.509715	5.82411	0.0270689	0.411893
ZNF286B	2.197	2.24287	1.05428	0.0271099	0.411893
ATP7B	1.60133	1.61925	1.91455	0.0271381	0.411893
EHBP1L1	0.443545	0.443677	6.92778	0.0271819	0.411893
APOLD1	0.699383	0.700372	4.42306	0.0272281	0.411893
CENPI	1.09886	1.11307	4.41363	0.0272323	0.411893
CLMP	0.548776	0.54913	5.47499	0.0272752	0.41201
PPCDC	-1.61252	-1.62729	2.17938	0.0273782	0.413034
PLOD2	0.375872	0.375889	9.51476	0.0275095	0.414482
FBXO36	-1.3368	-1.34545	2.41978	0.0275486	0.414537
PSMB8	0.680461	0.681673	5.002	0.0282774	0.424959
SLC38A2	0.400745	0.400763	9.42291	0.0283837	0.42601
MED26	-1.3139	-1.32161	2.56723	0.0285034	0.42726
SDHD	-0.60188	-0.602295	5.47313	0.0285918	0.428037
EAPP	-0.732313	-0.733621	4.15183	0.028661	0.428526
LINC02056	-1.78376	-1.8039	2.34992	0.0287283	0.428742
TNFRSF10B	-0.393391	-0.393418	8.29192	0.0287486	0.428742
MPZL1	-0.43451	-0.434602	7.21279	0.0287966	0.428912
VCL	0.383046	0.383068	9.10111	0.0288993	0.429755
MIR17HG	-1.94983	-1.97637	1.54491	0.0289371	0.429755
ZC3HAV1	-0.456861	-0.457012	6.52207	0.0289632	0.429755
LRRC32	0.753767	0.756546	4.43767	0.0290517	0.430524
POLR2C	-0.48307	-0.483312	5.9517	0.029101	0.43071
HMGCS1	0.48708	0.487152	6.1411	0.0291923	0.43082
IRF2BPL	0.569189	0.569561	5.45622	0.0292062	0.43082
RNF122	2.15273	2.24954	2.30244	0.0292187	0.43082
WBP4	-0.602716	-0.603316	4.96187	0.0292733	0.431082
DOCK4	0.537818	0.538801	5.8315	0.0295479	0.43458
ARFGAP1	0.436504	0.436615	7.17056	0.0297231	0.43661
MACF1	0.383432	0.383451	9.26663	0.0297702	0.436754
ANK3	2.24851	2.32833	0.956008	0.0299806	0.439291
C2CD5	0.556654	0.557056	5.36863	0.0300369	0.439566
SOD2	-0.417683	-0.417774	7.04726	0.0303512	0.443459
PRDM15	1.05341	1.05737	3.24987	0.0303786	0.443459
SP100	-0.419979	-0.420056	7.17032	0.0304918	0.444559
CAVIN2	0.675044	0.676064	4.56902	0.030603	0.445625
FDX1	0.576131	0.576574	5.31598	0.0307938	0.447354
BLVRB	0.562122	0.562626	5.07335	0.0307981	0.447354
COQ8B	0.752654	0.753803	4.31774	0.0309125	0.447474
LINC01583	1.55773	1.57115	2.05508	0.0309476	0.447474
APCDD1L-DT	2.46713	2.48834	1.61307	0.0309649	0.447474
FAR2	0.60551	0.606262	4.79816	0.0309907	0.447474
MYBL2	1.06735	1.09183	4.71387	0.0309972	0.447474
FAM210A	-0.698987	-0.700323	4.26612	0.0310853	0.447547
TMEM132B	1.63248	1.65503	1.93606	0.0311084	0.447547
NOCT	-0.84165	-0.843723	3.67802	0.0311168	0.447547
ELP4	-0.922955	-0.925803	3.44441	0.031302	0.449659
ZBTB11	0.542669	0.543122	5.24541	0.031357	0.449725
PKMYT1	1.43465	1.48909	4.14582	0.0313833	0.449725
HYOU1	0.401037	0.401091	7.82528	0.0314292	0.449833
SDC3	-0.740819	-0.742849	4.21492	0.0315626	0.451192
CCBE1	-0.428333	-0.428389	6.74936	0.0317462	0.451554
KIAA1586	-0.90191	-0.904115	3.68616	0.0317516	0.451554
RTN1	0.925125	0.93374	4.21537	0.0317557	0.451554
C14orf119	-0.485836	-0.48608	5.94669	0.0317993	0.451554
ABCC5	0.54344	0.543942	5.27929	0.0318103	0.451554
LNX1	-2.28603	-2.35397	1.1072	0.0318234	0.451554
PLEC	0.394172	0.394177	11.3821	0.0318589	0.451554
RNASET2	0.874054	0.876635	3.68661	0.0319405	0.451554
TCF21	-0.664322	-0.665208	4.51657	0.0319837	0.451554
TRAIP	-1.73781	-1.7812	2.43892	0.0319924	0.451554
BTN3A3	0.58897	0.589954	5.44246	0.0320237	0.451554
DUSP6	-0.747589	-0.748914	4.13923	0.0320503	0.451554
DCP1B	-0.808976	-0.810766	3.82661	0.0321875	0.452247
RNF4	-0.480269	-0.480473	6.20079	0.0321961	0.452247
THBS3	1.2356	1.24211	2.56585	0.032232	0.452247
PDE10A	-1.00693	-1.00996	3.21158	0.0322584	0.452247
VPS13B	0.470852	0.471045	6.30691	0.0323611	0.452247
SREBF2-AS1	2.05281	2.09091	1.16228	0.0323685	0.452247
NCOA1	-0.552003	-0.552498	5.16053	0.0323933	0.452247
DEPTOR	-1.78129	-1.85309	2.64212	0.032416	0.452247
EGR1	-0.433871	-0.434207	7.17495	0.0325072	0.452247
MUTYH	1.64973	1.67302	1.91108	0.0325243	0.452247
LETMD1	-0.543673	-0.544126	5.30557	0.0325427	0.452247
NECAP1	-0.522489	-0.522839	5.516	0.0325624	0.452247
BEND6	0.901421	0.903917	3.51593	0.032637	0.452588
EEPD1	-2.38492	-2.46141	0.81309	0.0327022	0.452588
C19orf66	-0.752824	-0.753881	4.39345	0.0327028	0.452588
SERPINB7	-0.580023	-0.580423	5.04452	0.0327613	0.452864
SORD	-0.67213	-0.67305	4.49534	0.0332304	0.458806
RALA	-0.469587	-0.469807	5.98141	0.0335703	0.462168
GRK5	0.577851	0.578433	5.03573	0.0336037	0.462168
LPIN1	0.40156	0.401628	7.40574	0.0336275	0.462168
ZCCHC17	-0.691091	-0.692147	4.32402	0.0336393	0.462168
TMEM231	0.955786	0.960632	3.41401	0.033671	0.462168
ANKRD11	0.395844	0.395881	8.30264	0.0337584	0.462826
NHLRC2	0.522895	0.523187	5.73662	0.03381	0.462991
ISCA1	-0.642588	-0.64349	4.6998	0.0339469	0.464324
LY6K	-1.48687	-1.4907	3.47245	0.034038	0.465027
RAB3IL1	-4.13599	-1.44269e+08	0.760974	0.0341158	0.465548
CDCA4	-0.674605	-0.675779	5.04857	0.0342052	0.465761
ST20	1.78982	1.81489	1.42223	0.0342704	0.465761
GRAMD1C	1.24973	1.25732	2.42425	0.0342829	0.465761
ZBTB2	-0.671791	-0.672779	4.37326	0.0343168	0.465761
DDX49	0.589255	0.589908	4.84859	0.0343486	0.465761
BNC2	0.52949	0.529875	5.37196	0.0343698	0.465761
NFYB	0.636983	0.637817	4.51641	0.0344631	0.466486
ANGPT1	0.465219	0.46548	6.44656	0.0345288	0.466836
RAD54L2	-0.49861	-0.498945	5.68121	0.0346224	0.467502
CHML	0.591271	0.592329	5.40411	0.0346578	0.467502
ASAH1	-0.433251	-0.433363	6.69686	0.0347303	0.467941
SAA1	1.66615	1.72275	2.85068	0.0348141	0.468531
DNPEP	-0.525162	-0.525529	5.48348	0.0348726	0.468781
SAP130	-0.528235	-0.528628	5.34858	0.0349498	0.469097
GANC	-0.672084	-0.672694	4.7753	0.0349762	0.469097
BMPR1B	1.70654	1.72837	1.62208	0.0350338	0.469333
CDKN2B	0.657024	0.657808	4.71525	0.0352422	0.471437
TMEM200A	-0.506074	-0.506453	5.97012	0.0352799	0.471437
CDK2	-0.491401	-0.491815	6.01557	0.0353115	0.471437
HOXA-AS2	2.11425	2.19606	1.53971	0.0354055	0.471823
UBR5	0.395151	0.395204	7.83073	0.0354209	0.471823
FER1L4	0.861653	0.863822	3.5976	0.0354971	0.4723
IFI35	-0.712803	-0.713509	4.49438	0.0355959	0.473006
LXN	-0.780641	-0.781921	3.90446	0.0356337	0.473006
DNAJB9	0.499279	0.49991	5.6233	0.035691	0.473006
GABPB2	0.613602	0.614403	4.53164	0.0357169	0.473006
NPIPA5	-1.50265	-1.52469	2.08383	0.035832	0.473006
ZFP41	1.20852	1.21495	2.7404	0.035863	0.473006
PELI1	0.928685	0.938019	4.24675	0.0358682	0.473006
ATP11A	0.720353	0.721653	4.14155	0.0359154	0.473006
MELK	-0.61072	-0.612109	5.30346	0.0359449	0.473006
R3HDM1	-0.524689	-0.525	5.67075	0.0359536	0.473006
GINS1	-1.12986	-1.14853	4.23292	0.0361823	0.47548
CCDC191	2.24907	2.3184	0.983205	0.0362539	0.475888
EEF1A1P13	2.01084	2.05108	1.14628	0.0362966	0.475916
LBX2-AS1	-1.96125	-2.00248	1.29991	0.0363721	0.476372
NPM1P29	2.50497	2.63396	1.1708	0.0364553	0.47693
THBS2	0.499269	0.499689	5.62798	0.0366659	0.478925
SIX4	-0.610147	-0.610669	4.79598	0.0366895	0.478925
QTRT1	0.639339	0.640421	4.39606	0.0368436	0.479949
MFSD2A	-0.92827	-0.931367	3.33154	0.0368672	0.479949
ANKRD10	0.513152	0.513538	5.39584	0.0368908	0.479949
SGO2	0.710796	0.712853	4.79053	0.0369951	0.48031
UPF3AP2	1.5715	1.59351	1.64811	0.0370005	0.48031
C16orf58	0.478738	0.479029	5.95028	0.0371048	0.48113
RPL39	-0.509243	-0.509504	5.92076	0.0372095	0.481451
TREX1	-1.02526	-1.03143	3.0481	0.0372116	0.481451
AHDC1	0.503121	0.503609	5.45559	0.0372655	0.481617
ETFB	0.659461	0.660359	4.50653	0.0373201	0.481791
IL24	-1.727	-1.73669	2.149	0.0374276	0.482523
STOML1	0.666551	0.667319	4.61149	0.0375089	0.482523
USF2	0.442156	0.442345	6.13824	0.0375139	0.482523
EMP3	-0.405912	-0.405994	7.28559	0.0375415	0.482523
VNN1	-1.02019	-1.02653	3.45395	0.0376566	0.483051
CYGB	0.492968	0.493213	5.63052	0.0376649	0.483051
FOXF2	0.453064	0.453401	6.24747	0.0377494	0.483443
TMEM184C	-0.461618	-0.461848	5.93332	0.0377898	0.483443
ADAR	-0.377874	-0.377908	8.36013	0.0378451	0.483443
CDHR3	2.04179	2.0848	1.15401	0.0378605	0.483443
SUGCT	-0.779642	-0.78145	3.87798	0.0380713	0.485606
TCF7L1	-1.94798	-1.98973	1.70145	0.0381763	0.48625
FGFR1OP2	0.446798	0.447025	6.30123	0.0382048	0.48625
ZNF276	0.840209	0.842414	3.57146	0.038254	0.486349
SNORC	2.21835	2.29579	1.09411	0.0383066	0.486489
NUP54	-0.577643	-0.578325	4.94327	0.0384078	0.487247
NDUFB11	0.487044	0.487288	5.85786	0.0385085	0.487603
LY96	-1.28986	-1.29788	2.58195	0.0385191	0.487603
NSA2	-0.474172	-0.474428	5.81317	0.0385652	0.48766
SZRD1	-0.402955	-0.403037	7.0744	0.0386175	0.487796
ADCY3	0.447791	0.447985	6.09202	0.0386766	0.487931
TPM1-AS	1.20605	1.21232	2.90607	0.038712	0.487931
SNRNP70	0.41511	0.415185	7.52396	0.0387531	0.487931
GLIS2	-0.592548	-0.593829	5.12684	0.0389114	0.489398
NINL	0.763145	0.764163	4.19629	0.0389617	0.489506
DYSF	1.45361	1.54256	3.65917	0.0390538	0.489823
DCAF6	-0.441535	-0.441693	6.25039	0.0390705	0.489823
SPAG16	0.729953	0.731339	4.15226	0.0393245	0.49248
ZNF525	1.29775	1.30657	2.24795	0.0394531	0.493564
ZNF587B	-1.03982	-1.04385	2.98241	0.039511	0.493761
INTU	0.641532	0.642767	4.55107	0.0397934	0.496514
ZNF462	0.847578	0.849582	3.80671	0.039816	0.496514
STARD5	1.61859	1.65457	1.79685	0.0398936	0.496953
RPIA	0.709203	0.710691	4.00371	0.040073	0.498452
DDX41	-0.494612	-0.494943	5.5477	0.040099	0.498452
CROCCP2	0.614083	0.614802	4.66507	0.0402171	0.499294
TBRG4	0.497568	0.497902	5.7497	0.0402519	0.499294
MFAP4	2.27208	2.39932	1.73992	0.0403613	0.500122
TMEM50A	-0.403934	-0.404008	7.34255	0.0404508	0.500234
ATRAID	-0.521751	-0.522096	5.42563	0.0404557	0.500234
GPR1	-0.602009	-0.602937	4.62525	0.0405335	0.500668
WDR89	0.895985	0.898947	3.29994	0.0406333	0.501309
B3GNT2	-0.658115	-0.659103	4.59321	0.0406709	0.501309
MDN1	0.4286	0.428738	6.55596	0.0407495	0.501749
PIGP	-0.965405	-0.968981	3.15941	0.0408247	0.502149
HLA-C	0.652431	0.654975	5.48386	0.0409666	0.503058
CTSC	-0.408195	-0.408299	7.24359	0.0410104	0.503058
NYAP1	-1.90788	-1.96213	1.57817	0.0410274	0.503058
ZNF383	-1.58453	-1.60402	1.61172	0.0411063	0.503498
DLX1	-0.918787	-0.922088	3.4053	0.0413426	0.505363
OAS2	-3.42793	-3.41129	3.3672	0.0413863	0.505363
UBXN7	0.427165	0.427316	6.53713	0.0413879	0.505363
TXNL4B	-0.919506	-0.922627	3.2406	0.0416808	0.508335
RXRB	0.619088	0.620012	4.49462	0.0417443	0.508335
COL4A1	0.368383	0.368411	8.76749	0.0418072	0.508335
SH2D5	-0.833255	-0.836106	3.8251	0.0418222	0.508335
SLC25A28	-0.631696	-0.632545	4.49577	0.0418481	0.508335
ZNF503	0.518207	0.519359	5.38046	0.041971	0.508464
SLC25A26	-0.731607	-0.733128	4.04839	0.0419817	0.508464
VPS28	0.459495	0.459732	5.85596	0.0419888	0.508464
PTTG1	-0.497716	-0.498176	5.87501	0.0420502	0.508622
REEP2	-1.10443	-1.11599	3.67489	0.0420887	0.508622
NLRC5	0.524652	0.525229	5.55945	0.0422103	0.509566
SMG7	-0.420749	-0.420897	6.43349	0.0424599	0.511988
MFSD5	-0.556183	-0.556729	4.93367	0.0426042	0.511988
TMEM167B	-0.492835	-0.493097	5.78839	0.0426099	0.511988
B3GALT2	-1.8107	-1.99563	4.25262	0.0426587	0.511988
PIGU	-0.727199	-0.728339	4.3758	0.0426921	0.511988
DPM1	-0.509888	-0.510295	5.27345	0.0427034	0.511988
PDLIM7	0.408876	0.408971	7.15644	0.0427166	0.511988
DTD1	0.44358	0.443761	6.25791	0.0427811	0.512237
THNSL1	1.59393	1.61184	1.81161	0.0430141	0.514501
MANBAL	-0.564162	-0.564714	4.98235	0.0432714	0.517051
PRKD2	-0.544687	-0.545196	5.21793	0.0434673	0.518171
ADCY10P1	1.4529	1.46671	1.91006	0.0435611	0.518171
PNPLA3	0.432933	0.433123	6.26038	0.0435758	0.518171
RFWD3	-0.479696	-0.479912	5.71612	0.0435794	0.518171
ARHGEF10	0.424763	0.424898	6.55944	0.0435861	0.518171
USP21	0.679289	0.680447	4.31001	0.0436936	0.518923
RHOB	0.417704	0.417825	6.62636	0.0438068	0.519584
NIF3L1	0.74391	0.745669	4.06511	0.043838	0.519584
NLRP1	0.423025	0.423194	6.32714	0.0439295	0.519691
POGLUT1	-0.547095	-0.547587	5.03377	0.0439577	0.519691
FAM20C	-1.62745	-1.70019	7.60723	0.04398	0.519691
HAS1	2.08481	2.13146	1.99932	0.044045	0.519935
USP19	0.447987	0.448227	5.87117	0.0441302	0.520417
CPE	0.795968	0.807286	4.32076	0.0443334	0.521812
ZNF248	0.818699	0.82097	3.61928	0.0443375	0.521812
EXOC1	0.428425	0.428598	6.20695	0.0444163	0.522215
CDH4	0.447087	0.447319	5.90909	0.0445271	0.522652
ACP1	-0.431414	-0.431585	6.25097	0.0445427	0.522652
C20orf96	1.16191	1.16915	2.66152	0.0448415	0.524892
DMTF1	0.442386	0.442566	6.1869	0.0448437	0.524892
ARL2BP	-0.459785	-0.459997	5.97544	0.0448679	0.524892
SMARCE1	-0.497818	-0.498196	5.33935	0.0450536	0.52543
NUS1	-0.438648	-0.438822	6.25663	0.0451054	0.52543
PPID	0.515843	0.516271	5.21849	0.0451284	0.52543
RBMS3	0.491811	0.492085	5.69804	0.0451557	0.52543
TAF11	0.71001	0.711381	4.05393	0.0452189	0.52543
COX6A1	-0.554838	-0.555487	4.71411	0.0452369	0.52543
UBE2V1	-1.48086	-1.49552	1.8461	0.0454828	0.52543
DTNA	-0.791666	-0.793021	3.83206	0.0455483	0.52543
LSM4	0.443411	0.44366	6.31267	0.0455958	0.52543
EPSTI1	-0.870122	-0.872272	4.0995	0.045627	0.52543
ZNF692	0.627849	0.628791	4.41128	0.0456343	0.52543
CYB561D2	-0.843344	-0.84593	3.51022	0.0456686	0.52543
ROCK1	0.39824	0.398309	7.44248	0.0456909	0.52543
ZC3H12C	-0.554077	-0.554702	4.84327	0.0457105	0.52543
SLIT2	-0.40595	-0.406086	6.59574	0.045714	0.52543
E2F3	-0.517385	-0.517857	5.17377	0.0457869	0.52543
GPRC5A	0.749985	0.751082	4.26552	0.0458106	0.52543
FAM92A	0.515004	0.515421	5.36481	0.0458909	0.52543
MRS2	0.528432	0.528896	5.05594	0.0460142	0.52543
PWWP2A	-0.707804	-0.709112	4.22564	0.0460984	0.52543
MTFR2	-2.07811	-2.22248	2.08664	0.046222	0.52543
PYROXD2	0.823033	0.824684	4.05627	0.0464404	0.52543
VPS45	0.50488	0.505291	5.23714	0.0464936	0.52543
FPR1	0.976943	0.979587	3.2293	0.0465016	0.52543
DECR1	0.488439	0.488791	5.37446	0.0466423	0.52543
ZNF700	-1.07085	-1.0761	2.8022	0.0466705	0.52543
PLSCR1	-0.4831	-0.483185	5.94461	0.0467105	0.52543
RBBP8	-0.492852	-0.493259	5.25241	0.046762	0.52543
CDC42BPA	0.379446	0.379499	7.70539	0.0467662	0.52543
CORO2B	0.474442	0.474755	5.54495	0.0467767	0.52543
CMTM7	-0.750046	-0.751806	4.24274	0.0468406	0.52543
SNRPG	-0.567284	-0.567795	5.05687	0.0468471	0.52543
AMZ1	1.48452	1.56453	3.36577	0.0468857	0.52543
NAALAD2	0.582811	0.583516	4.74402	0.0468921	0.52543
RFK	-0.489773	-0.490046	5.66457	0.0468995	0.52543
VPS26C	-0.46087	-0.461159	5.67259	0.0469214	0.52543
SDC1	-1.08094	-1.08631	2.76878	0.0469608	0.52543
DHX36	0.402789	0.402907	6.70954	0.0469657	0.52543
CDH11	0.425387	0.425753	6.86238	0.0469796	0.52543
IRF7	-0.876914	-0.876143	4.17222	0.0469799	0.52543
B4GAT1	0.545122	0.545928	4.91964	0.0469835	0.52543
MBNL2	0.468856	0.469069	6.31328	0.0469995	0.52543
GAR1	-0.648132	-0.649188	4.237	0.047	0.52543
TRIM9	-6.15973	-144269485	0.796129	0.0470121	0.52543
MAP4K3-DT	1.08809	1.09466	2.96659	0.0470728	0.52543
F3	0.540462	0.540175	5.39573	0.0470779	0.52543
ISL1	1.53641	1.55403	1.61672	0.0471225	0.52543
TXNDC11	-0.486709	-0.487034	5.52495	0.0471705	0.52543
EMC3-AS1	-1.6309	-1.65619	1.71683	0.0472276	0.52543
TMEM159	-0.697089	-0.698073	4.2464	0.0472628	0.52543
SPAG9	-0.397817	-0.397904	7.14175	0.0472677	0.52543
PTPN2	-0.552628	-0.553192	4.90692	0.0472704	0.52543
ADAMTSL1	0.423135	0.423265	6.71746	0.0472896	0.52543
FOXC2	-0.518166	-0.518321	5.46641	0.0473994	0.526151
UBR7	-0.525423	-0.525849	5.16444	0.0474639	0.526369
ATXN2	-0.418355	-0.418491	6.61567	0.0475851	0.527215
KLHDC8B	-0.984469	-0.988805	2.93564	0.0476748	0.527709
BHMT2	0.524055	0.524547	5.02334	0.0479077	0.529786
B3GNT5	-0.840529	-0.844017	3.52982	0.0480506	0.530866
E2F1	-0.926739	-0.934042	4.38379	0.0482341	0.532391
ATAT1	1.07409	1.07982	2.66356	0.0483217	0.532604
TMEM246	-0.65353	-0.65543	4.39094	0.0484408	0.532604
FAT4	0.423687	0.423841	6.36984	0.0484744	0.532604
PLAUR	-0.400433	-0.400512	7.0919	0.0485417	0.532604
FN3K	-1.17718	-1.19048	3.17427	0.0485549	0.532604
CEP135	0.627696	0.628917	4.47569	0.0486208	0.532604
IMMP2L	0.985111	0.989519	2.94346	0.0486378	0.532604
ACTR1B	0.410267	0.410374	6.89089	0.0486845	0.532604
TXNRD1	-0.366608	-0.366655	8.50167	0.0487585	0.532604
FIBP	0.526296	0.526731	5.33497	0.0488694	0.532604
AJUBA	0.385582	0.38569	7.28267	0.0488732	0.532604
AK5	-0.479872	-0.48002	5.59754	0.0489884	0.532604
LAMP2	-0.380842	-0.380903	7.71828	0.0489911	0.532604
ZBTB25	0.769708	0.771405	3.89343	0.0489941	0.532604
TNK2	0.463084	0.463323	5.91534	0.0490823	0.532604
BICC1	0.464161	0.464412	5.61343	0.0491596	0.532604
FASTKD3	1.01435	1.01873	2.94582	0.0492223	0.532604
CXCL2	-0.906214	-0.910423	5.17199	0.0492551	0.532604
PSMA5	-0.4238	-0.423963	6.29658	0.0492666	0.532604
CDC42EP2	0.457703	0.458078	5.79377	0.0493169	0.532604
CLK1	-0.444805	-0.445021	5.94513	0.0494006	0.532604
OTUD6B-AS1	0.584719	0.585502	4.6066	0.0494078	0.532604
TENT4A	-0.470258	-0.47059	5.6531	0.0494584	0.532604
ME3	0.654136	0.655162	4.43268	0.0494983	0.532604
CXXC5	0.49909	0.499585	5.26645	0.0495011	0.532604
C1orf54	0.967506	0.972062	2.98366	0.0495864	0.532604
GALNT11	0.482508	0.482853	5.38008	0.0495979	0.532604
ERRFI1	-0.409311	-0.409574	6.99205	0.0496474	0.532604
HSP90B1	0.351654	0.351662	10.3577	0.0497456	0.532604
ZNF17	1.49622	1.51631	1.66876	0.0497496	0.532604
NFATC3	-0.651796	-0.65273	4.41297	0.0497574	0.532604
INPP4B	0.462775	0.463209	5.64421	0.0497998	0.532604
ZNF771	0.793239	0.795426	3.52452	0.0498595	0.532604
SNRNP35	0.721367	0.723206	3.93021	0.0499093	0.532604
SHARPIN	0.471281	0.471601	5.50148	0.0499478	0.532604
DBF4	-0.724369	-0.726503	4.24974	0.049964	0.532604
ARMCX4	0.545365	0.545822	5.23067	0.0499957	0.532604
PDE7B	2.13743	2.22112	1.12472	0.0499968	0.532604
ASAP3	-1.30697	-1.3347	2.55792	0.0500464	0.532604
DERL1	-0.434741	-0.434914	6.21147	0.0500707	0.532604
ANXA1	-0.352337	-0.352344	9.81431	0.0501774	0.533255
CLTCL1	0.513922	0.514812	5.15644	0.0502569	0.533615
CC2D2A	0.542764	0.543411	4.91937	0.0504726	0.535125
CRADD	-0.903628	-0.906868	3.28588	0.0504904	0.535125
PAIP2	-0.544498	-0.545011	5.04451	0.0507495	0.535767
TNFAIP8	-1.09629	-1.10251	2.72025	0.0507746	0.535767
FICD	0.724166	0.725521	4.10611	0.0507818	0.535767
CCDC61	0.763883	0.765622	3.77223	0.0508063	0.535767
SIRT7	0.683122	0.684077	4.44655	0.0508408	0.535767
ZNF565	1.55351	1.5746	1.89839	0.0509807	0.535767
STARD3NL	-0.443261	-0.443489	5.87152	0.051005	0.535767
ROMO1	0.515983	0.516353	5.40399	0.0510446	0.535767
RBM38	-1.53116	-1.54545	1.94662	0.0510592	0.535767
RAB22A	-0.408451	-0.408594	6.43607	0.0511137	0.535767
HCFC2	0.540738	0.541331	4.76693	0.0511335	0.535767
C8orf37	1.40845	1.42132	1.9555	0.0511645	0.535767
C5	1.15701	1.16817	2.50864	0.0512243	0.535767
MLPH	0.439861	0.440046	6.26135	0.0512291	0.535767
RHOC	-0.391532	-0.391588	7.62342	0.0512565	0.535767
SMAD9	-0.677652	-0.678606	4.66945	0.0513852	0.535767
TOP2B	0.381912	0.381981	7.47201	0.0513958	0.535767
TAMM41	0.88928	0.89252	3.24887	0.0514052	0.535767
SVIP	-0.644091	-0.6453	4.1932	0.0514194	0.535767
NDUFB4	-0.44672	-0.446924	6.02153	0.0515668	0.536826
ALOX12P2	-2.40741	-2.7555	2.38612	0.0516824	0.53688
LINC00857	-1.49352	-1.50808	1.78985	0.0516908	0.53688
EYA4	0.782823	0.785631	3.60518	0.0517368	0.53688
BGN	-3.59432	-1.44269e+08	2.41865	0.0517936	0.53688
ITGA10	-0.623417	-0.622132	5.0695	0.0518343	0.53688
CDH13	0.493158	0.493857	5.31121	0.0518578	0.53688
PID1	0.534754	0.535356	4.97634	0.0518926	0.53688
CCNE1	-0.964589	-0.968517	2.99161	0.0519707	0.537214
NMNAT2	0.662467	0.66657	4.76498	0.0521007	0.538083
RPL29	-0.377462	-0.377499	8.28086	0.05217	0.538244
HMGB1P6	1.43199	1.45372	2.40416	0.0522946	0.538244
BID	-0.547072	-0.547598	4.9149	0.0522976	0.538244
LONP1	0.417982	0.418127	6.65868	0.0523	0.538244
KYNU	3.24237	1.44269e+08	1.4082	0.0524057	0.538859
EPHA5	0.426499	0.426643	6.59331	0.0525481	0.539506
RCBTB2	0.881729	0.88436	3.43195	0.0525606	0.539506
ABCA13	-1.60555	-1.63679	3.41644	0.0526559	0.540011
CLIP4	0.405706	0.405836	6.89525	0.0528166	0.541185
SEMA4G	1.71742	1.75705	1.8863	0.0528709	0.541269
CDK10	0.470549	0.470834	5.66434	0.0530492	0.54262
MIR181A2HG	1.74898	1.77658	1.55028	0.0531082	0.542751
HDAC4	0.705973	0.707306	4.06687	0.0532033	0.543249
BRWD1	0.419914	0.420075	6.3479	0.053253	0.543282
CDADC1	1.01815	1.02364	2.83623	0.0534174	0.543771
MAP3K8	-2.10604	-2.18171	0.799775	0.0534309	0.543771
ABHD5	-0.498541	-0.499422	5.28921	0.0534401	0.543771
NAMPT	-0.461625	-0.461863	5.85473	0.0535065	0.543975
WDR77	0.587428	0.588368	4.54483	0.0536444	0.544546
SIRPA	0.716174	0.719742	4.1048	0.0536555	0.544546
SBNO1	0.42477	0.424936	6.32234	0.0537731	0.545029
MOSMO	-0.647304	-0.648422	4.14609	0.053831	0.545029
GOT1	0.427572	0.427773	6.06062	0.0538426	0.545029
SHKBP1	-0.391452	-0.391562	6.75122	0.0539044	0.545184
SLC25A1	0.380096	0.380153	7.43667	0.0541925	0.547573
FAM222B	-0.52899	-0.529514	4.89997	0.0542341	0.547573
L3MBTL1	1.38866	1.39635	2.23405	0.0542832	0.547597
SHPRH	0.686772	0.688238	3.97144	0.0544082	0.547704
PRMT2	0.394649	0.394766	6.69943	0.0544105	0.547704
TMEM171	-0.649099	-0.649801	4.48818	0.0545145	0.547704
GCLC	-0.549131	-0.549608	5.12735	0.0545185	0.547704
NCSTN	-0.391817	-0.39188	7.37508	0.0545274	0.547704
TMEM186	1.13607	1.14421	2.59207	0.0547183	0.54915
RGL3	0.829432	0.832065	3.5411	0.0550169	0.551238
QRSL1	-0.685289	-0.686367	4.35815	0.0550584	0.551238
FAM57A	-0.436595	-0.436838	5.7855	0.0550674	0.551238
ANKS3	0.62038	0.621393	4.20081	0.055347	0.553374
CSRNP2	-0.45213	-0.452478	5.78255	0.0553752	0.553374
PCMTD1	0.446517	0.446965	5.71606	0.055456	0.553654
FPGS	0.416206	0.416385	6.14075	0.0554976	0.553654
RNASEH2C	0.642109	0.643255	4.45143	0.0556552	0.554753
ATP2B1	0.392309	0.392397	6.82552	0.0557885	0.555609
DUS2	0.910459	0.913788	3.3566	0.0558469	0.555719
UTP20	0.422628	0.422861	6.10961	0.0559066	0.555753
TECPR1	0.443985	0.44419	6.0049	0.0559451	0.555753
TPP2	0.414727	0.41493	6.10485	0.0560145	0.555935
LINC01278	-0.721638	-0.723021	4.09662	0.0560582	0.555935
DNER	0.434008	0.434239	6.42832	0.0561231	0.556108
ZNF180	1.26217	1.27031	2.4869	0.0561868	0.556269
FAM171A1	-0.559299	-0.559636	4.96626	0.0566156	0.559787
BCAS4	-1.0083	-1.01345	2.90464	0.0566887	0.559787
RPL3P4	1.04557	1.05008	2.91187	0.0567752	0.559787
TMED2	-0.372357	-0.372399	8.11643	0.0567911	0.559787
ICE2	0.475496	0.475835	5.42237	0.0568579	0.559787
ZNF468	-0.915018	-0.918713	3.02218	0.0568609	0.559787
PIAS1	-0.606187	-0.606928	4.62261	0.0569499	0.559787
CAVIN4	1.9859	2.03164	0.800971	0.0570485	0.559787
DDX58	-0.518247	-0.518475	4.95741	0.0570485	0.559787
USP25	0.43125	0.43149	5.96282	0.0570528	0.559787
URB2	0.646096	0.647192	4.34783	0.0570791	0.559787
CLCF1	1.20602	1.22296	2.63445	0.0571153	0.559787
PLXNB1	-0.951443	-0.957902	3.67518	0.057332	0.561131
ZNF37BP	0.725839	0.727593	3.97682	0.0573482	0.561131
LINC00339	-1.24099	-1.25017	2.39166	0.057566	0.562386
PRUNE2	0.826377	0.830868	3.58148	0.0575868	0.562386
FUBP3	-0.41253	-0.412674	6.4221	0.0576203	0.562386
TMEM44	0.464742	0.465168	5.61716	0.0576823	0.562522
EIF3E	0.362808	0.362854	7.9903	0.0577438	0.562654
HLA-A	0.467564	0.468229	6.43097	0.0578052	0.562784
SYNE3	0.649034	0.650165	4.19513	0.0580568	0.564349
TRIM7	0.776653	0.779441	3.69997	0.0580622	0.564349
FSIP2	3.12388	1.44269e+08	4.18828	0.0581259	0.5645
HMGA1	-0.343097	-0.343103	10.1565	0.0581916	0.564567
NRXN2	-1.83625	-1.86624	1.98529	0.0583082	0.564567
TMEM38B	-0.574247	-0.574986	4.47063	0.058347	0.564567
GATD1	0.447023	0.447389	5.78585	0.05835	0.564567
FRYL	0.416344	0.416496	6.34778	0.0583736	0.564567
TRIM69	-0.725839	-0.727234	3.80971	0.0585746	0.566044
EVA1C	-1.09827	-1.10491	2.4906	0.0587544	0.566682
ITGA6	0.365176	0.365286	7.92647	0.0587878	0.566682
PRKAA2	0.616274	0.618113	4.36389	0.0588957	0.566682
RIN3	0.426009	0.426262	5.94258	0.0589325	0.566682
BLVRA	0.614633	0.615465	4.49445	0.0590283	0.566682
HELZ2	-0.416847	-0.416819	6.91341	0.0590339	0.566682
DHCR24	0.364371	0.364413	7.86833	0.0590459	0.566682
SLC9A3R1	-0.549611	-0.550469	4.62169	0.0590776	0.566682
GJA1	-1.7143	-1.74382	1.16329	0.059116	0.566682
AIMP1	0.433744	0.433977	5.83434	0.0591399	0.566682
UTP23	0.594622	0.595439	4.54223	0.0591724	0.566682
MRPL16	0.554517	0.555208	4.73122	0.0593226	0.567252
ZNF91	0.799321	0.801966	3.42834	0.0593287	0.567252
SBF2	0.416789	0.416954	6.24984	0.0594574	0.568019
ZNF513	-0.607741	-0.608677	4.29432	0.0596159	0.568601
ZNF12	0.542891	0.543468	4.82945	0.0596591	0.568601
KLHDC4	0.656366	0.657511	4.14447	0.0596638	0.568601
SHISA5	-0.369227	-0.369274	7.71742	0.0597628	0.569081
GALNS	-0.506066	-0.506521	5.05444	0.0598767	0.569703
ADAMTSL4	0.792221	0.794551	4.27237	0.0600539	0.570926
BRI3BP	-0.55716	-0.557816	4.8153	0.060126	0.571148
ZDHHC9	-0.445465	-0.445661	5.97817	0.0602386	0.571754
STX12	0.395129	0.395265	6.49098	0.0604781	0.572914
SERPINE2	-0.604	-0.604428	4.62833	0.0605479	0.572914
ZMAT5	0.995914	1.00017	2.96104	0.0605637	0.572914
KRTAP1-5	2.79351	3.18513	0.817917	0.0606119	0.572914
FYTTD1	-0.41086	-0.410983	6.62995	0.0606761	0.572914
UBE2B	-0.425027	-0.425236	5.91985	0.0606832	0.572914
CARMIL1	-0.553007	-0.553453	4.95472	0.0607029	0.572914
C1R	0.662101	0.663454	3.94806	0.0607549	0.572943
SCARA3	2.40472	2.43856	1.15644	0.0608273	0.57316
CACNA1C	0.513751	0.513787	5.17467	0.0609184	0.57316
DCAF17	-0.517147	-0.5176	5.16344	0.0609727	0.57316
FAM111A-DT	-0.895363	-0.898814	3.0657	0.0609926	0.57316
RGS4	-0.855368	-0.871031	5.33978	0.0610224	0.57316
UNC45A	0.401909	0.402024	6.72326	0.0613325	0.57506
SUMF2	0.376139	0.376227	7.01062	0.0613367	0.57506
PTPN13	0.400223	0.400357	6.52144	0.0614842	0.57506
TIGD6	1.09391	1.09986	2.5759	0.0615143	0.57506
PCOLCE	0.392969	0.393087	6.5869	0.061556	0.57506
PSG9	-1.72439	-1.7622	1.49971	0.0615632	0.57506
MMP11	-1.48746	-1.54079	2.53548	0.0615951	0.57506
CRYBG1	-0.710448	-0.712623	4.13977	0.0616171	0.57506
CKAP5	0.359062	0.359114	7.75554	0.0616749	0.575142
NDUFV1	0.404783	0.404891	6.71962	0.061992	0.577639
PIBF1	0.610548	0.611397	4.47677	0.0621782	0.578709
LRIG1	0.483427	0.48393	5.23436	0.0622055	0.578709
GPAM	0.617124	0.61796	4.2342	0.0622858	0.578996
ERG28	-0.468628	-0.469087	5.23327	0.0625769	0.58103
PRDM8	0.657323	0.658418	4.21146	0.0626444	0.58103
SCAND1	0.494101	0.494503	5.21892	0.0626712	0.58103
LINC01687	1.16705	1.18014	2.49969	0.0627028	0.58103
THEM4	-0.916804	-0.920333	3.22812	0.0628463	0.581899
TLE4	-0.445732	-0.446005	5.70397	0.0630315	0.582622
ADAL	-0.760471	-0.762457	3.60944	0.0630915	0.582622
TMPRSS11E	-3.39817	-1.44269e+08	6.1701	0.0631358	0.582622
F2RL2	-0.525963	-0.526543	5.18242	0.0631363	0.582622
SNRPGP2	-1.35616	-1.37188	1.94257	0.0631729	0.582622
EIF4EBP2	-0.374495	-0.374571	7.2439	0.0632416	0.582797
SGTB	-0.408264	-0.40843	6.22077	0.0633795	0.583592
TSC22D3	0.390494	0.390602	6.6389	0.0634599	0.583592
STC2	-0.338654	-0.338664	10.0722	0.0634948	0.583592
MRPS18C	-0.830596	-0.832968	3.40211	0.0635269	0.583592
STAP2	1.72994	1.77509	1.72559	0.0637396	0.585087
RIMS3	2.1763	2.27536	1.74542	0.0639922	0.586251
RPRD1B	-0.480843	-0.481255	5.13459	0.0640136	0.586251
GALK2	0.610687	0.611809	4.14202	0.0640165	0.586251
CMBL	-0.597316	-0.598084	4.57569	0.0641353	0.586636
AP1G2	0.741329	0.742846	3.72786	0.0641586	0.586636
SSBP2	0.725236	0.727187	3.99632	0.0643155	0.587299
DHFR2	1.20764	1.21605	2.49637	0.0643797	0.587299
PIF1	0.80817	0.811559	3.5531	0.0643815	0.587299
MRPL46	0.991695	0.996852	2.68931	0.0644967	0.587568
RETREG3	-0.413441	-0.413628	6.03227	0.0646173	0.587568
LINC02035	1.22027	1.24134	2.49751	0.0646709	0.587568
BCL2L1	-0.345808	-0.345836	8.5559	0.0647118	0.587568
RDH10	0.772813	0.775686	3.66103	0.064753	0.587568
CHD1L	0.408308	0.40848	6.18074	0.0647662	0.587568
HR	2.48603	2.68576	1.05031	0.0647962	0.587568
ARMCX3	0.372471	0.37256	7.24215	0.064812	0.587568
MVD	0.446555	0.446727	5.71784	0.0649684	0.588532
HK2	0.495928	0.49682	5.28359	0.0651092	0.58898
PRXL2C	-0.775163	-0.77802	3.6801	0.0651554	0.58898
DDI2	0.528596	0.529082	4.99382	0.0651852	0.58898
NDNF	-0.536133	-0.5366	4.8206	0.0652308	0.58898
SLC1A4	0.490748	0.491541	5.48219	0.0653217	0.58898
NPIPB3	-1.16173	-1.16888	2.3754	0.0653544	0.58898
DUSP22	-0.722788	-0.724895	3.67224	0.0653697	0.58898
2021-03-03	-0.898475	-0.901617	3.19616	0.065512	0.589759
KIF15	0.904699	0.912768	3.93369	0.0656055	0.589759
IGHV3-74	3.4001	3.73641	0.3812	0.0656294	0.589759
LUC7L3	0.378698	0.378765	7.36376	0.0656573	0.589759
ATXN7L2	1.19835	1.20616	2.35918	0.0661123	0.593387
RANBP9	-0.42339	-0.423609	5.8876	0.066185	0.593387
STS	-0.452472	-0.452622	5.71737	0.0662417	0.593387
ETV6	-0.661323	-0.662451	4.1263	0.0663272	0.593387
TGS1	-0.48302	-0.483462	5.03587	0.066359	0.593387
LDHAP4	2.15051	2.36364	0.999778	0.066365	0.593387
PEMT	0.756308	0.758109	3.70076	0.0666944	0.595878
SRSF11	0.360491	0.360544	7.75351	0.0668851	0.597127
ZBTB20	1.12105	1.12872	2.44665	0.0669866	0.597146
FBXO5	-0.625242	-0.626552	4.7808	0.066992	0.597146
YRDC	-0.55215	-0.552882	4.53143	0.0671129	0.597146
MCUB	-0.982983	-0.989572	3.345	0.0671397	0.597146
FABP4	-2.31143	-2.52758	1.25651	0.067142	0.597146
DNAJC30	-0.995002	-0.999585	2.8205	0.06729	0.597979
C12orf66	-0.943042	-0.947221	2.88161	0.0673466	0.597979
PLEKHA5	0.433046	0.43349	5.76141	0.0674147	0.597979
ILF3-DT	1.1484	1.1577	2.408	0.0674398	0.597979
SH2D4A	-0.647545	-0.648965	4.17698	0.0675393	0.598123
RPS6KA6	0.98962	0.994185	2.60482	0.067558	0.598123
USF1	-0.54141	-0.542136	4.54431	0.0677431	0.599309
ACTN4	0.341353	0.341371	9.65507	0.0678663	0.599486
JDP2	0.524031	0.525594	5.24029	0.0678782	0.599486
TANGO2	-0.652777	-0.653971	4.08458	0.0679165	0.599486
DMXL1	0.413665	0.413871	6.09562	0.0681052	0.600045
ARSJ	-0.383545	-0.383635	7.11361	0.0681266	0.600045
GOLGA8B	0.493434	0.493921	4.98206	0.0681334	0.600045
CYB5R2	-0.635696	-0.637212	4.01366	0.0682837	0.600836
HNRNPH2	0.417343	0.417533	5.95724	0.0683257	0.600836
CAVIN3	0.404765	0.405064	6.86467	0.068453	0.601504
PTER	-0.652766	-0.654144	4.12555	0.068667	0.602144
SLC35E3	-0.838302	-0.842014	3.44215	0.0687207	0.602144
UBE2L3	-0.379179	-0.379283	6.81516	0.0687307	0.602144
DALRD3	0.581788	0.582643	4.39205	0.0687313	0.602144
PIP4K2C	-0.446389	-0.446678	5.51145	0.0687958	0.602259
EBPL	0.446007	0.446336	5.42049	0.0688505	0.602287
BCS1L	0.546265	0.547208	4.63024	0.0689074	0.602336
EIF3A	0.342306	0.342325	9.04395	0.0690546	0.603173
HLA-DPB1	1.03552	1.04169	2.4753	0.0691171	0.603269
ALG5	-0.529389	-0.53011	4.64237	0.0692297	0.603803
BRIP1	0.741832	0.745192	3.86872	0.0693301	0.604228
CLCN2	-1.08715	-1.09639	2.41013	0.0694041	0.604334
PLEKHM3	0.947679	0.951794	2.893	0.0694453	0.604334
ZBTB48	0.796858	0.79914	3.52741	0.0695722	0.604384
CYB5B	-0.400586	-0.400787	6.19706	0.0695987	0.604384
TRAPPC12	-0.435748	-0.435971	5.83741	0.0696058	0.604384
AKAP6	2.01649	2.10903	1.07989	0.0696688	0.604484
AP4E1	0.445242	0.445562	5.41317	0.0698487	0.605034
STAT1	-0.346717	-0.346732	8.28462	0.0698604	0.605034
UVSSA	0.568178	0.569035	4.35225	0.0699331	0.605034
HSD17B10	0.541719	0.542515	4.8391	0.0699386	0.605034
ALDH1B1	0.455332	0.45571	5.32592	0.0700398	0.605462
CUL7	0.43455	0.434918	5.53355	0.0701759	0.605806
PELI2	3.22951	3.41666	0.438936	0.0701829	0.605806
DIAPH2	0.417807	0.417992	6.03669	0.0704147	0.607359
IGF2BP3	0.448806	0.449101	5.41573	0.0705612	0.608175
ACAT2	0.516441	0.516942	5.3391	0.0706312	0.608331
LIMK2	0.467365	0.467767	5.19966	0.0708333	0.609536
LRRCC1	-0.704546	-0.70608	3.8265	0.0708751	0.609536
LAMA4	1.51846	1.53413	1.42644	0.0709466	0.609704
RAI1	0.386415	0.386522	6.60894	0.0710837	0.610435
CNEP1R1	-0.551136	-0.551911	4.56645	0.0712495	0.61108
GPX1P1	0.448768	0.449078	5.51991	0.0712631	0.61108
CIRBP	0.375142	0.375216	7.13328	0.071565	0.61322
FOXQ1	1.25444	1.28367	2.35494	0.0716565	0.613555
NADSYN1	0.39869	0.398843	6.21369	0.0718869	0.614959
ZFPM2-AS1	0.823063	0.827985	3.32902	0.0719665	0.614959
MAPRE2	-0.394216	-0.394361	6.37098	0.0720551	0.614959
CDC14B	-0.495887	-0.496554	4.83867	0.0720764	0.614959
FTH1	-0.349051	-0.349085	8.56098	0.0720862	0.614959
MCAM	0.359837	0.359941	7.49647	0.0721351	0.614959
BARD1	-0.805073	-0.809943	4.05528	0.0722441	0.61544
THOC1	0.583435	0.584297	4.46339	0.0723983	0.616306
UQCR10	-0.465067	-0.465397	5.36252	0.072507	0.616783
NAGPA	0.757287	0.759337	3.52584	0.0726515	0.617564
ERF	-0.454136	-0.454397	5.34013	0.0727307	0.617789
TXNRD3	0.727384	0.729085	3.95587	0.0729093	0.618542
BBS4	-0.693014	-0.69476	3.68489	0.0729249	0.618542
ATG12	-0.413378	-0.413582	6.01954	0.0729934	0.618672
TMEM204	-0.509974	-0.510962	4.80538	0.0731174	0.618672
TRMT11	-0.562668	-0.563577	4.44286	0.0731592	0.618672
CCDC14	0.388076	0.388216	6.36099	0.0731683	0.618672
ZFYVE19	0.604115	0.6049	4.5291	0.0732335	0.618672
TGIF1	-0.538002	-0.538643	4.67575	0.0732568	0.618672
DUSP28	1.54067	1.56412	1.43458	0.0734132	0.619546
RNF144B	-0.574178	-0.574797	4.50127	0.0735044	0.61987
DNAJB2	-0.418637	-0.418881	5.71114	0.0736515	0.620288
NDUFA4L2	-2.55353	-2.88698	1.24525	0.0736598	0.620288
CHD9	0.375235	0.375323	7.0178	0.0737325	0.620454
WDR34	0.512393	0.513744	5.00735	0.0738242	0.62078
PUS10	1.10188	1.1095	2.39437	0.0740544	0.622269
HDAC3	-0.450267	-0.45061	5.36865	0.0741506	0.622632
ANXA9	1.40032	1.41538	1.81403	0.0742555	0.623007
MAD2L2	-0.479621	-0.480089	4.98056	0.0743017	0.623007
TRABD2A	-0.561207	-0.562012	4.52101	0.0745733	0.624366
PPP4R1L	-0.900171	-0.904455	2.82417	0.074602	0.624366
FBXO6	-1.33478	-1.3507	1.85065	0.0746463	0.624366
BCHE	0.350743	0.350827	7.86334	0.0746768	0.624366
SATB1	0.453095	0.453673	5.66808	0.0749564	0.626258
OSER1	-0.482661	-0.483119	4.98973	0.0752476	0.628134
CHAF1A	0.563415	0.566497	5.13279	0.0753287	0.628134
RPL13A	0.351117	0.351124	10.4195	0.0754191	0.628134
CECR7	1.48243	1.50353	1.50334	0.0754632	0.628134
RAB28	-0.549488	-0.550269	4.43058	0.0754965	0.628134
PURA	0.429072	0.429329	5.67434	0.0755486	0.628134
KAT2A	0.442299	0.442513	5.61216	0.0755561	0.628134
COL6A1	0.34438	0.344385	9.62559	0.0756955	0.628846
AKR1C1	1.76977	1.83705	1.25324	0.0758255	0.629481
ODC1	-0.377215	-0.377309	6.85032	0.0759085	0.629724
ST3GAL6	0.624804	0.627561	4.67205	0.0761982	0.63168
MORC3	0.441616	0.441969	5.44495	0.0764383	0.632743
FDXR	-0.541282	-0.542547	5.13012	0.0765459	0.632743
MAP3K6	-0.448987	-0.449286	5.45055	0.076598	0.632743
DHTKD1	0.505737	0.506259	4.90112	0.0766064	0.632743
DPH1	0.508921	0.509659	4.7238	0.0766235	0.632743
LCMT2	-0.664839	-0.665943	3.98169	0.0766725	0.632743
NDRG1	0.383554	0.383685	6.56072	0.0767375	0.632743
C22orf39	0.621869	0.623328	3.98757	0.0767583	0.632743
PSMC4	-0.396722	-0.396875	6.2849	0.0769724	0.634062
BRIX1	-0.510877	-0.511393	4.83898	0.0771083	0.634735
ATP6V0A2	-0.459703	-0.460099	5.15026	0.0772488	0.635446
TERT	0.335948	0.335978	10.0668	0.0773893	0.636155
SUFU	0.576682	0.577651	4.41204	0.0775434	0.636654
EIF2AK3	0.488621	0.489363	4.91438	0.0775586	0.636654
IFT172	0.549034	0.549707	4.60366	0.0776809	0.636996
TGFBI	0.319619	0.319621	11.5419	0.0777792	0.636996
CCDC85B	0.367119	0.367172	7.74871	0.0778629	0.636996
AMIGO2	0.477205	0.477386	5.14414	0.0778959	0.636996
FAM214B	-0.411588	-0.411869	5.69082	0.0779199	0.636996
METTL23	0.655069	0.656539	3.90955	0.0779677	0.636996
PDGFRA	0.381584	0.381738	6.47138	0.0779807	0.636996
ZDBF2	0.467055	0.46765	5.13524	0.0780757	0.637329
SCCPDH	0.405562	0.405813	5.76102	0.0781969	0.637424
ASF1A	-0.575103	-0.575979	4.59102	0.078239	0.637424
PPP3CB-AS1	-1.30832	-1.32489	1.64807	0.078283	0.637424
EFNB2	0.462395	0.462786	5.20672	0.0783049	0.637424
MRPS24	1.636	1.66478	1.26313	0.0787526	0.640623
AP1M1	-0.351329	-0.351389	7.4961	0.0791613	0.643126
METTL22	-0.528339	-0.529176	4.6575	0.0792259	0.643126
ELF4	-0.405003	-0.405179	6.01763	0.079305	0.643126
NAV2	-0.393546	-0.393763	6.18029	0.0793703	0.643126
KDM5D	0.439998	0.440332	5.41546	0.0793875	0.643126
RNF7	-0.409052	-0.409278	5.80092	0.0793895	0.643126
ENDOG	0.810879	0.817418	3.41564	0.0794738	0.643213
TBCD	0.37281	0.372945	6.58527	0.07951	0.643213
SLC35A5	-0.437622	-0.437958	5.35048	0.0796117	0.643592
ZCCHC4	-0.616684	-0.617905	3.99341	0.0796791	0.643608
HSD17B4	0.356818	0.3569	7.27973	0.0797259	0.643608
WDR83	1.36176	1.37482	1.89377	0.079824	0.643608
COQ5	0.529988	0.530702	4.64083	0.0798333	0.643608
WDR20	-0.513203	-0.513861	4.60146	0.0799178	0.643846
GMIP	0.662143	0.663478	4.06853	0.0801169	0.645007
AEBP1	0.374755	0.374862	6.94031	0.0802708	0.645802
GFRA1	-0.695172	-0.697134	3.83999	0.0803654	0.64612
COBLL1	-0.433577	-0.43392	5.3925	0.0804673	0.646492
SLC39A10	0.402955	0.403121	6.04125	0.0805219	0.646492
SLC45A1	-1.47559	-1.51187	1.56875	0.0806218	0.646827
E4F1	0.602143	0.603261	4.3349	0.0806788	0.646827
SCLY	1.49947	1.5267	1.33363	0.0807292	0.646827
TTC19	0.45316	0.453499	5.36193	0.0807903	0.646874
WDR76	-0.736446	-0.737745	4.55409	0.0809165	0.647238
ALDH3A2	0.423519	0.424391	6.0584	0.0810229	0.647238
RFXAP	0.937965	0.94308	2.64629	0.0810571	0.647238
C8orf88	-0.819188	-0.82285	3.20756	0.0811083	0.647238
AVIL	1.50878	1.53369	1.28584	0.0811404	0.647238
FANCD2	-0.632516	-0.63557	4.42141	0.0811824	0.647238
KNSTRN	-0.48442	-0.485008	4.93434	0.0812222	0.647238
HELZ	0.422254	0.422535	5.79744	0.0813515	0.647828
INHBE	1.61544	1.69747	2.43873	0.081473	0.648321
FOXP1	-0.395111	-0.395374	6.15189	0.0815241	0.648321
ACSL4	0.349392	0.349432	7.96184	0.0815889	0.648396
CCDC126	0.919785	0.924877	3.1998	0.0816543	0.648477
CCDC85A	-1.21127	-1.21516	2.62316	0.0818251	0.649394
TCF25	0.373156	0.373244	6.93829	0.081931	0.64953
UAP1L1	-0.628842	-0.630499	3.95059	0.0820666	0.64953
MED10	-0.461114	-0.461513	5.13562	0.0820831	0.64953
ALG3	-0.446498	-0.446885	5.14006	0.082131	0.64953
ZNF234	0.745797	0.747963	3.44914	0.0821763	0.64953
SERTAD4-AS1	4.94637	1.44269e+08	0.359166	0.0822032	0.64953
STAT4	-2.04238	-2.13342	1.10704	0.0822906	0.64953
VAMP2	-0.424647	-0.424983	5.53006	0.0822985	0.64953
SWI5	-0.558543	-0.559479	4.35204	0.082341	0.64953
DNAJC21	0.389015	0.389175	6.16625	0.0824672	0.650087
SNRPGP15	-1.8862	-1.92401	1.06814	0.0826443	0.650725
NRK	3.92373	1.44269e+08	4.13782	0.082659	0.650725
BCKDHB	0.599596	0.600361	4.69707	0.0829007	0.651804
PYCARD	1.25331	1.27013	2.22445	0.0829508	0.651804
KANSL1	-0.58623	-0.587252	4.16283	0.0830717	0.651804
LINC00963	-0.5114	-0.511992	4.72287	0.0831084	0.651804
KLHL7	0.47329	0.473784	4.87612	0.0831575	0.651804
PGLS	0.468299	0.46863	5.44447	0.083166	0.651804
SLX4	0.537475	0.538269	4.43836	0.0831854	0.651804
SLC26A6	0.463311	0.463762	4.97702	0.0833533	0.652376
ZNF813	-1.31282	-1.3246	2.07323	0.083378	0.652376
POMK	1.10011	1.10744	2.30065	0.0834253	0.652376
GFOD1	-0.801823	-0.806137	3.18833	0.0835028	0.652546
IBA57	-0.875698	-0.879204	3.03531	0.0836389	0.652765
DIP2A	0.416566	0.416777	5.89889	0.0836582	0.652765
TBL1X	0.376664	0.376796	6.44244	0.0837242	0.652765
P2RX4	-1.66982	-1.69054	1.84392	0.0837535	0.652765
DNASE1	0.683439	0.684985	3.77688	0.0840572	0.654055
TRIM3	-0.500417	-0.501017	4.72447	0.0840617	0.654055
UBA2	-0.359452	-0.359527	7.08673	0.084102	0.654055
ZNF823	1.67542	1.74589	1.55255	0.0841423	0.654055
PSG1	-2.71165	-3.13083	0.58674	0.0844055	0.655417
ARSD	0.535826	0.537001	4.57769	0.0844293	0.655417
SPAG4	0.93858	0.943161	2.77697	0.0845325	0.655784
MAP1LC3A	-0.450749	-0.451067	5.497	0.0846498	0.656236
WDFY3-AS2	1.01075	1.01549	2.83626	0.0847608	0.656236
HERC3	-0.420505	-0.420801	5.40328	0.0847884	0.656236
IER3IP1	-0.472349	-0.472688	5.46098	0.0848753	0.656236
CLEC2D	1.56485	1.60261	1.29762	0.0849561	0.656236
ZC3H11A	0.342296	0.342353	7.63316	0.0850017	0.656236
CTSH	-1.74933	-1.81296	1.17241	0.0850404	0.656236
CCR7	1.03911	1.04564	2.71169	0.0850445	0.656236
ADAM10	-0.337566	-0.337599	8.15512	0.0850999	0.656236
BTG2	-0.794979	-0.801195	4.1943	0.0851506	0.656236
DIPK1A	0.49513	0.495762	4.65901	0.085317	0.656908
ZNF880	-0.731124	-0.733293	3.39655	0.0853499	0.656908
BCKDK	-0.406808	-0.407063	5.61142	0.0856337	0.65866
AGAP4	1.80986	1.85816	0.828723	0.0856965	0.658711
SELENOH	0.536674	0.537442	4.72103	0.0859275	0.65974
TAF6L	0.733567	0.736249	3.43382	0.0859429	0.65974
PMAIP1	-0.388614	-0.38872	6.08229	0.0861247	0.660703
ESM1	0.421789	0.421668	5.70793	0.0865352	0.663417
PNPT1	-0.417778	-0.418016	5.63898	0.0866667	0.663991
NCBP3	0.409165	0.409454	5.57266	0.0868223	0.664749
EFCAB7	-1.0382	-1.04385	2.66795	0.0870191	0.665494
C12orf75	-0.346124	-0.346147	7.6933	0.0870331	0.665494
DHDDS	-0.423057	-0.423325	5.58582	0.0871524	0.665526
CROCC	0.540903	0.541476	4.85564	0.0871926	0.665526
UBAC2	-0.405432	-0.405637	5.76892	0.0872076	0.665526
USP45	0.463071	0.463632	4.98595	0.0873455	0.665988
LCA5	0.871752	0.87537	2.9329	0.0873818	0.665988
KLF9	0.3716	0.371735	6.36918	0.0875652	0.666952
DUSP19	1.56575	1.597	1.17808	0.0877698	0.667189
ZNF384	-0.4458	-0.446198	5.09672	0.0878455	0.667189
SPATA2L	0.683277	0.685415	3.69764	0.0878927	0.667189
ADAMTS14	1.89026	1.92612	1.46664	0.0879163	0.667189
INTS4	-0.546869	-0.547592	4.55656	0.0879321	0.667189
RAB6B	-1.02531	-1.03829	2.78748	0.0879551	0.667189
LRRC37A2	1.79586	1.84951	0.862882	0.0879947	0.667189
LRCH2	0.477973	0.478856	4.82275	0.0881789	0.668154
MOSPD1	-0.621045	-0.622259	4.038	0.0883841	0.66886
STAMBPL1	-0.388148	-0.38835	5.96753	0.08841	0.66886
RRP1B	-0.387795	-0.387982	5.91167	0.0884595	0.66886
GCNA	-1.12984	-1.14602	2.41709	0.0885004	0.66886
PCDHB10	1.79693	1.86817	0.863345	0.0885783	0.669017
KDM8	1.45027	1.47186	1.3766	0.0888835	0.670352
CDCA8	-0.568412	-0.570883	4.9597	0.0889014	0.670352
SDHB	-0.387057	-0.387238	6.1295	0.0889575	0.670352
FAM160B1	-0.35612	-0.35621	6.86187	0.0889837	0.670352
ABCB9	-0.738225	-0.740578	3.32005	0.0891139	0.670901
WDR7	0.467424	0.467851	5.16219	0.0893239	0.67205
ERMP1	0.428847	0.429222	5.35347	0.0896233	0.672843
MAPK8IP3	0.380003	0.380098	6.8123	0.089631	0.672843
MYLIP	0.649859	0.651404	3.80243	0.0896804	0.672843
TAF1B	-0.501829	-0.502362	4.71308	0.0896892	0.672843
OXSR1	-0.347684	-0.347746	7.39054	0.0897162	0.672843
ST3GAL3	0.469789	0.470252	5.1543	0.0898255	0.672958
PSEN2	-0.523344	-0.523928	4.77497	0.0898464	0.672958
AK6	-0.391751	-0.391971	5.91832	0.0899664	0.673427
AAAS	0.448156	0.448595	5.12044	0.0904049	0.676157
GLS	0.342775	0.342822	7.73668	0.0904465	0.676157
FOXM1	-0.475332	-0.475805	5.78047	0.0905475	0.676332
FAM206A	-0.578699	-0.579753	4.15923	0.0905853	0.676332
FAM50B	0.921561	0.926043	2.71609	0.0906588	0.67645
DDB2	-0.443612	-0.443976	5.23934	0.0907329	0.676572
MTRNR2L12	-1.47135	-1.49122	1.49212	0.091207	0.679143
INPP5B	0.514918	0.515542	4.6699	0.0912113	0.679143
RPL15P3	1.65873	1.68859	1.20302	0.091338	0.679143
GREM2	-1.78211	-1.84826	1.05845	0.0913829	0.679143
RAD54L	1.0466	1.07186	3.31476	0.0913924	0.679143
LIMS2	0.401691	0.402004	5.75117	0.0914253	0.679143
FBXO32	1.06462	1.07569	2.70274	0.0917007	0.679555
COX20	1.39559	1.41552	1.44238	0.0917734	0.679555
MYC	-0.359252	-0.359365	6.55787	0.091777	0.679555
NAP1L1	0.327733	0.327755	8.83584	0.0918043	0.679555
FLOT2	0.36155	0.361663	6.64106	0.091828	0.679555
SLC25A25	0.493833	0.494585	4.80693	0.0918286	0.679555
CCDC39	0.58632	0.589867	5.77051	0.0919152	0.679767
MFHAS1	0.63253	0.635497	4.28923	0.0922158	0.680966
KRT8	0.40648	0.406771	5.60368	0.0922245	0.680966
FKBP8	0.354082	0.354119	8.13698	0.0922517	0.680966
SNCAIP	-1.20711	-1.24988	2.36367	0.0923917	0.680982
PNRC2	0.812861	0.816616	3.04597	0.0923924	0.680982
NT5C	0.547877	0.548773	4.59072	0.0924282	0.680982
POLE	-0.521966	-0.522247	5.32432	0.0927081	0.682616
SLC25A13	-0.569124	-0.56993	4.45874	0.0927696	0.68264
ICAM1	-1.13476	-1.14672	3.39787	0.0929705	0.683689
ULK1	0.401364	0.401755	5.72934	0.0931366	0.684034
CDK20	-1.15596	-1.16548	2.1415	0.0931468	0.684034
SLFN12	0.456111	0.456589	4.883	0.0931925	0.684034
MAP3K7CL	0.793911	0.80107	3.34315	0.0933085	0.684302
ATP6V1E2	1.46212	1.50908	1.66218	0.0933908	0.684302
CWC22	-0.521105	-0.521704	4.77596	0.0934582	0.684302
FAM218A	1.56985	1.60095	1.149	0.0935232	0.684302
EPB41L4A-AS1	0.710241	0.712075	3.5574	0.0935257	0.684302
EIF4G2	-0.31962	-0.319629	9.98526	0.0935792	0.684302
C1orf21	-0.499967	-0.500862	4.57162	0.0937206	0.684616
MED6	0.682575	0.684484	3.50589	0.0938065	0.684616
ELK3	-0.338566	-0.338621	7.80527	0.0938636	0.684616
DYNLT1	-0.371984	-0.372136	6.24318	0.0939689	0.684616
KARS	-0.353614	-0.353701	6.93284	0.0940053	0.684616
MYL12B	-0.330071	-0.330112	8.0155	0.0940187	0.684616
KLC4	0.910211	0.915144	2.96305	0.0940776	0.684616
RHOG	-0.393991	-0.394166	6.10456	0.0941319	0.684616
PLEKHA2	0.419128	0.419413	5.50735	0.0941479	0.684616
PSMG2	-0.458207	-0.458566	5.21699	0.0943098	0.685268
EVA1B	0.396233	0.39643	5.92336	0.0943544	0.685268
MCTS1	0.456321	0.456821	4.95442	0.0944957	0.685793
RAB4B	0.958612	0.964843	2.4522	0.0945437	0.685793
HSPA4L	0.606108	0.607232	4.64444	0.0946696	0.686282
TRIM6	0.722144	0.724757	3.34215	0.0949105	0.687204
NLK	-0.664462	-0.666024	3.79374	0.0950535	0.687204
ODF2	-0.403866	-0.404122	5.76938	0.0950572	0.687204
MAP2	0.736763	0.744198	3.71712	0.0950681	0.687204
GNG2	0.617209	0.618247	3.99329	0.09509	0.687204
IL10RB	-0.44156	-0.441919	5.06827	0.0951653	0.687324
GIT1	-0.393363	-0.393643	5.75496	0.0953589	0.688299
SOAT1	-0.369862	-0.370093	6.20662	0.0954415	0.688471
PHYKPL	-0.500996	-0.501966	4.50901	0.095501	0.688477
MVP	0.335706	0.33574	8.42151	0.0955718	0.688564
OGT	0.332009	0.332042	8.48235	0.095809	0.689848
MED27	0.581532	0.582984	4.07127	0.0960042	0.690199
ATP6V1D	-0.359577	-0.359697	6.51259	0.0960957	0.690199
RAB15	-1.30915	-1.32041	1.82856	0.0961095	0.690199
UGGT2	0.354262	0.354361	6.90774	0.0961338	0.690199
IQGAP3	0.417436	0.418097	6.15032	0.0961745	0.690199
LURAP1	-1.67067	-1.70038	1.14957	0.0962109	0.690199
SEMA4A	-2.20053	-2.356	0.87561	0.096373	0.690668
INKA1	-1.54184	-1.5748	1.27618	0.0964512	0.690668
BCAT2	0.421925	0.422281	5.44766	0.0964531	0.690668
MFSD1	-0.354825	-0.354932	6.61836	0.0965191	0.690719
CHST11	2.21996	2.42037	0.846901	0.0965979	0.690861
TNKS	0.384446	0.384605	6.34814	0.0974367	0.695961
DZIP3	0.451927	0.452404	4.8582	0.0974477	0.695961
MTRF1	0.720897	0.72373	3.3732	0.0974892	0.695961
HMBS	0.47151	0.472089	4.81822	0.0976812	0.696908
FUNDC2	0.482309	0.482901	4.66668	0.0977553	0.697012
DSN1	-0.592237	-0.593223	4.46263	0.0979181	0.697714
ARMC7	-0.736209	-0.738451	3.54836	0.0980036	0.697714
CD58	-0.688678	-0.691058	3.32493	0.098103	0.697714
HECA	-0.389796	-0.390021	5.83705	0.0982446	0.697714
CCNT1	-0.402534	-0.402763	5.81611	0.0982768	0.697714
ECHDC2	-2.59546	-2.66315	0.969052	0.0983047	0.697714
ST7	-0.457736	-0.458251	4.85775	0.0983255	0.697714
CCDC97	0.610106	0.611839	4.11791	0.0983514	0.697714
AREG	-2.92817	-1.44269e+08	2.98097	0.0983894	0.697714
CD47	-0.347658	-0.347726	7.03587	0.0984662	0.697836
SNRPD3	-0.38316	-0.383331	5.85782	0.0985451	0.697973
CUTA	0.355705	0.355807	6.77851	0.0988773	0.699422
PITHD1	-0.400299	-0.400564	5.51271	0.0990212	0.699422
IRF3	0.393502	0.393718	5.70549	0.0991019	0.699422
FAM219A	-0.420167	-0.42053	5.20207	0.099105	0.699422
DMPK	0.41845	0.418681	5.59284	0.0991933	0.699422
LUZP2	1.949	2.06422	1.10528	0.0992254	0.699422
RNF217	0.482141	0.482591	5.02299	0.0992483	0.699422
TMEM256	0.835905	0.839717	2.7913	0.0992736	0.699422
ZNF767P	0.673801	0.675573	3.59429	0.0992866	0.699422
PHPT1	-0.376651	-0.376827	5.89359	0.0994703	0.700295
HNRNPUL2	-0.420372	-0.420682	5.42694	0.0995642	0.700535
C3orf18	-0.627932	-0.630512	4.14503	0.0996254	0.700545
SETMAR	-1.02961	-1.03536	2.62772	0.099692	0.700593
BRI3	-0.34056	-0.34063	7.18827	0.0998883	0.701179
ARF4	-0.325126	-0.325146	8.84445	0.099895	0.701179
CAMTA1	-0.44332	-0.443827	4.89016	0.100022	0.701274
MCUR1	-0.385814	-0.386042	5.82713	0.100124	0.701274
USF3	0.428609	0.428989	5.18782	0.100293	0.701274
RBM12B	0.484967	0.485566	4.64767	0.100353	0.701274
EXD3	0.602617	0.603694	3.96353	0.100355	0.701274
CFAP44	1.69107	1.72878	1.03916	0.100379	0.701274
PGAP1	0.536309	0.5372	4.57666	0.100404	0.701274
PEX5L	1.47325	1.53013	2.49046	0.10044	0.701274
USP49	0.650494	0.651761	3.82556	0.100467	0.701274
RHPN2	1.33869	1.35754	1.55533	0.100544	0.701274
ZNF770	0.404574	0.404843	5.52163	0.100567	0.701274
CLCN5	-0.589455	-0.592758	4.96615	0.100704	0.701484
NETO2	0.397557	0.398277	5.57416	0.100761	0.701484
PSPH	0.434381	0.434811	5.13394	0.100776	0.701484
LINC00894	1.62372	1.65188	1.20772	0.100877	0.70177
KHSRP	-0.342626	-0.34267	7.55823	0.100939	0.701785
CERS5	-0.360191	-0.360338	6.52394	0.101165	0.702574
MAFG-DT	1.07027	1.07934	2.3304	0.101173	0.702574
AASDH	0.635872	0.637815	3.98571	0.101339	0.703236
TENM1	1.13102	1.14443	2.15091	0.101388	0.703236
FAM84A	-0.591659	-0.593217	4.14548	0.101564	0.70404
ZDHHC14	-0.916694	-0.92232	2.59305	0.10187	0.705747
ARFGAP2	0.374468	0.374675	5.78434	0.102071	0.706058
WRAP53	-0.659813	-0.661464	3.6444	0.102271	0.706058
GOLPH3L	0.455564	0.456072	4.99393	0.102298	0.706058
ZNF717	1.4022	1.42313	1.42026	0.102346	0.706058
ADCY6	0.367096	0.367201	6.58522	0.102364	0.706058
ADCK5	0.935996	0.941374	2.71856	0.102365	0.706058
BCAT1	0.321141	0.321165	8.66793	0.102508	0.706058
PARP14	-0.356697	-0.356682	6.77334	0.102525	0.706058
VMP1	-0.350086	-0.350178	6.7297	0.102545	0.706058
ARF3	-0.346869	-0.346953	6.94593	0.10257	0.706058
APBA1	-0.541246	-0.542542	4.33489	0.102578	0.706058
SNHG19	0.659699	0.661915	3.63158	0.102662	0.706174
PSMA3-AS1	0.481034	0.481588	4.824	0.102715	0.706174
SELENON	-0.339601	-0.339662	7.37768	0.102872	0.706837
POLR3E	-0.505292	-0.506004	4.45097	0.103068	0.707768
RUNDC3B	-1.67434	-1.71792	1.16004	0.103315	0.70905
COX7C	-0.345298	-0.34538	6.95748	0.103591	0.71053
SH3BP2	-0.404895	-0.405092	5.55039	0.103803	0.711491
THAP10	0.963222	0.969287	2.41455	0.103853	0.711491
CRYL1	0.700923	0.704172	3.64625	0.103999	0.712077
HOXB2	-0.353027	-0.353143	6.50362	0.104086	0.71226
BMPR2	0.335008	0.335054	7.86878	0.104222	0.712773
BAK1	-0.512215	-0.513039	4.48783	0.104356	0.713265
EPB41L1	0.455497	0.455838	4.94175	0.104416	0.713265
SMIM10	0.542671	0.544641	4.45277	0.104559	0.713449
KCNAB3	-0.920015	-0.927234	3.35981	0.104564	0.713449
TPBG	-0.329493	-0.329509	8.10314	0.104653	0.713524
HM13	-0.339947	-0.340013	7.17374	0.10471	0.713524
ALG13	0.452569	0.453011	5.10132	0.104758	0.713524
GNB1L	-0.933452	-0.937668	2.7301	0.104958	0.713943
TOX	-2.12413	-2.19752	1.13825	0.105001	0.713943
NRBP2	0.39532	0.395681	5.48012	0.105002	0.713943
MOCOS	-0.512558	-0.512789	4.89587	0.105068	0.713977
TGFB2	0.40392	0.405596	6.63113	0.105248	0.714783
EFEMP1	1.17304	1.18586	2.20115	0.105453	0.715527
ENPP2	1.37914	1.4063	1.70277	0.105526	0.715527
PSMD3	-0.341009	-0.341083	6.90649	0.105569	0.715527
VKORC1	-0.728546	-0.730985	3.34646	0.105602	0.715527
FAM189B	0.357652	0.357784	6.31019	0.105708	0.715559
RFNG	-0.451906	-0.452357	5.14623	0.105763	0.715559
TRPC4	0.748232	0.74969	3.41759	0.105789	0.715559
DERL2	-0.423868	-0.424259	5.26487	0.105921	0.716035
DPY19L2	1.33576	1.35298	1.95019	0.106095	0.716211
ATP6V0B	-0.364008	-0.364113	6.38417	0.1061	0.716211
ICAM3	-1.00142	-1.00679	2.76932	0.10613	0.716211
CASP2	-0.41278	-0.413167	5.2711	0.106467	0.71807
MRPL51	0.372445	0.372645	5.92715	0.106777	0.719746
TUBE1	0.516959	0.518546	4.6	0.106909	0.720226
CEP290	0.372219	0.372416	5.9222	0.107061	0.720633
LCE2A	0.384158	0.384549	6.30892	0.107093	0.720633
CEP295	0.580394	0.581436	4.28981	0.107419	0.721784
IL12A	-1.83988	-1.92995	2.01213	0.107552	0.721784
ERH	-0.380575	-0.380743	6.20463	0.107565	0.721784
DPM2	-0.441842	-0.442319	4.84017	0.107609	0.721784
NCBP1	-0.357581	-0.357713	6.24799	0.10776	0.721784
TTC30B	1.65168	1.72434	0.972305	0.107835	0.721784
GSKIP	0.423483	0.423941	5.20218	0.107881	0.721784
CWF19L1	-0.531767	-0.532821	4.14128	0.10796	0.721784
ZNF273	1.75111	1.84422	0.973091	0.107974	0.721784
ZNF621	-0.484603	-0.485277	4.57209	0.108394	0.721784
PEX13	0.44513	0.445599	4.82083	0.108408	0.721784
PLEKHN1	-0.650791	-0.652094	3.7471	0.108414	0.721784
KTI12	-0.614676	-0.616027	3.8416	0.108438	0.721784
RIDA	-0.573956	-0.574896	3.96742	0.108441	0.721784
AARS	0.325213	0.325264	8.09226	0.108505	0.721784
SMARCAD1	0.386936	0.387167	5.67602	0.108575	0.721784
SCML1	-0.49428	-0.495048	4.68453	0.108607	0.721784
C17orf53	1.10468	1.11751	2.59015	0.108656	0.721784
MYOCD	1.61505	1.70917	1.94962	0.108716	0.721784
STC1	-0.322263	-0.322294	8.50735	0.108765	0.721784
ARHGAP20	-1.0201	-1.02793	2.15617	0.108807	0.721784
PRUNE1	0.788507	0.791493	3.15349	0.108938	0.721784
MAPKAPK5	-0.450716	-0.451235	4.77007	0.108941	0.721784
FKTN	0.37641	0.376616	5.76977	0.109018	0.721784
METTL5	-0.392624	-0.392905	5.42612	0.109053	0.721784
TEK	-0.442157	-0.442211	5.12025	0.109122	0.721784
MSH3	-0.504541	-0.505216	4.5842	0.109155	0.721784
DAB2IP	-0.419979	-0.420347	5.17206	0.109238	0.721784
ENSA	0.353256	0.353381	6.56169	0.109258	0.721784
MMD	-0.500102	-0.500769	4.53349	0.109323	0.721784
KRR1	0.472314	0.472819	4.84136	0.109437	0.721784
UBL7-AS1	1.75199	1.84904	0.879943	0.109448	0.721784
TST	0.74118	0.744652	3.21347	0.109462	0.721784
CALU	-0.308606	-0.308611	10.9457	0.109504	0.721784
KDM2B	0.441971	0.442455	4.83932	0.109522	0.721784
BBS12	-0.860479	-0.865241	2.67115	0.109589	0.721784
RAB3D	-1.10152	-1.11779	2.8956	0.109595	0.721784
GTF2H5	0.424091	0.424459	5.06938	0.109604	0.721784
POLRMT	0.362649	0.362809	6.14888	0.109736	0.722252
UBALD2	-0.369942	-0.370129	6.11331	0.1098	0.722263
APBA3	0.570279	0.571706	4.34692	0.109909	0.722577
EFHD1	-0.583057	-0.586341	4.08963	0.110113	0.723488
NUDT3	0.477525	0.478122	4.64494	0.110309	0.723488
IFT20	-0.531172	-0.531851	4.35935	0.110321	0.723488
SIPA1L1	0.329194	0.329262	7.34603	0.110388	0.723488
ZNF322	-0.942151	-0.947503	2.85817	0.110417	0.723488
DENND2A	1.42664	1.42785	1.79129	0.110465	0.723488
MEGF9	0.533435	0.534068	4.64528	0.110485	0.723488
PER3	-1.30227	-1.31841	1.61346	0.110576	0.723488
RTEL1-TNFRSF6B	1.46585	1.48911	1.39955	0.110603	0.723488
UBN2	0.475742	0.476411	4.63211	0.110991	0.725534
ENO2	-0.381393	-0.381635	5.6906	0.111098	0.725534
SMPD3	1.78117	1.84757	1.22082	0.111102	0.725534
TRAPPC2	0.713184	0.715274	3.45628	0.111247	0.72608
ADAM15	-0.353567	-0.353706	6.35612	0.111389	0.726411
ZNF675	1.25053	1.26971	1.71713	0.111435	0.726411
PROSER3	-0.534333	-0.535116	4.31624	0.111484	0.726411
FAM234A	0.424914	0.425287	5.62016	0.11161	0.726829
RASGRF2	-0.619872	-0.621371	3.68293	0.111692	0.726961
ARRB2	0.576109	0.577267	3.9261	0.111776	0.7271
MYL5	0.656105	0.657646	3.70949	0.111905	0.727536
GPR153	-0.621036	-0.622143	4.19777	0.112056	0.728114
SH3GL1P3	1.61737	1.65479	1.20043	0.112435	0.730174
CEP126	0.748623	0.75214	3.0379	0.112589	0.730184
SPATA20	0.357301	0.357447	6.36572	0.112596	0.730184
UBIAD1	-0.480222	-0.480852	4.5505	0.112623	0.730184
PROX2	2.43883	2.82662	0.692655	0.112781	0.730799
SFMBT1	-0.692008	-0.694225	3.3077	0.112848	0.730831
NOX4	1.41375	1.43682	1.23815	0.113195	0.73248
BRPF3	-0.376244	-0.376447	6.03532	0.113228	0.73248
NAB1	-0.375993	-0.37625	5.6968	0.113376	0.732796
FOXC1	-0.650078	-0.652384	3.82452	0.113401	0.732796
FIG4	0.348087	0.348309	7.01551	0.113555	0.732945
PMM2	-0.476829	-0.477531	4.44547	0.113565	0.732945
RPL31	-0.31769	-0.317712	8.76718	0.113634	0.732945
TGFBRAP1	-0.369974	-0.370171	5.81379	0.113714	0.732945
GPATCH3	-0.850757	-0.854914	2.77777	0.113737	0.732945
ACADL	2.1092	2.50254	0.923902	0.113814	0.733036
SETDB1	0.45834	0.458941	4.59474	0.113994	0.733228
SFXN5	0.848993	0.853636	2.78138	0.114091	0.733228
CUEDC1	-0.40651	-0.406924	5.6381	0.114138	0.733228
OXLD1	0.674361	0.676065	3.61715	0.114188	0.733228
GNB5	0.401002	0.401312	5.33562	0.114223	0.733228
HLA-B	0.358691	0.359381	8.10889	0.114299	0.733228
AFAP1L1	-0.495995	-0.496627	4.51584	0.114305	0.733228
SLC38A7	-0.468082	-0.468523	4.9828	0.114452	0.733228
UIMC1	-0.485457	-0.486108	4.5851	0.114474	0.733228
MRPS35	0.37639	0.376617	5.699	0.114521	0.733228
CCDC134	1.16659	1.17968	1.78464	0.114532	0.733228
LINC01137	1.61561	1.65975	1.01274	0.114739	0.734153
SDHAF3	-0.852647	-0.857005	2.91699	0.114957	0.734754
MRPL18	-0.391883	-0.392142	5.44992	0.115236	0.734754
RAB1A	-0.320087	-0.320125	7.97295	0.115237	0.734754
MPDZ	0.36673	0.366943	5.89923	0.115284	0.734754
FARS2	0.705649	0.708957	3.3051	0.115344	0.734754
AUNIP	-1.62247	-1.68621	1.16512	0.115359	0.734754
XXYLT1	0.546049	0.547069	3.9632	0.115593	0.734754
RCC1	-0.356749	-0.356908	6.0476	0.115612	0.734754
DENND4B	0.391745	0.391982	5.64095	0.11563	0.734754
SV2A	0.3502	0.350312	6.63504	0.11565	0.734754
NBEA	1.09905	1.10903	2.58917	0.115652	0.734754
MYL6	0.328222	0.32824	9.32255	0.115671	0.734754
DIXDC1	0.455377	0.455816	4.86862	0.115677	0.734754
ECM2	-1.41557	-1.43269	1.42072	0.115892	0.734754
CDK6	0.333854	0.333887	7.45524	0.115976	0.734754
CRELD2	0.382954	0.383083	5.9538	0.116084	0.734754
DVL2	-0.382394	-0.382643	5.55583	0.116152	0.734754
RAB7A	-0.318795	-0.31883	8.12072	0.11617	0.734754
LAMB3	-0.41376	-0.413322	5.76834	0.116196	0.734754
FBLN5	-0.41137	-0.411792	5.14651	0.116227	0.734754
CCDC15	-1.12964	-1.15874	2.30823	0.116252	0.734754
NUP88	-0.383989	-0.384262	5.46264	0.116297	0.734754
MTCO3P12	-0.468848	-0.469335	4.95263	0.116504	0.734754
RELL2	0.970846	0.97947	2.75034	0.116505	0.734754
STEAP2	0.589439	0.590317	4.2768	0.116526	0.734754
TENT5A	0.405114	0.405827	5.35367	0.116539	0.734754
PLEKHJ1	0.402757	0.403075	5.35966	0.116549	0.734754
SBDSP1	-0.407633	-0.407957	5.27234	0.116597	0.734754
LRP1	0.309339	0.309347	10.5203	0.11665	0.734754
RILP	-1.06951	-1.07791	2.12442	0.117062	0.736952
GPX1	0.330092	0.330123	8.34142	0.11743	0.737885
MRPL1	0.536899	0.538066	4.02493	0.11748	0.737885
RTL8B	0.393675	0.394021	5.29516	0.117727	0.737885
RBX1	-0.566567	-0.567779	3.97697	0.117764	0.737885
CARD6	0.49015	0.491288	4.55278	0.117859	0.737885
ZNF671	1.63426	1.67514	0.799279	0.117888	0.737885
ZNF641	0.721606	0.726449	4.26881	0.117893	0.737885
CENPJ	-0.541681	-0.543039	4.3636	0.11795	0.737885
EMC3	-0.376971	-0.377207	5.60862	0.117987	0.737885
TMEM203	0.407857	0.408193	5.21444	0.118037	0.737885
HIRIP3	-0.62529	-0.626764	3.87878	0.118071	0.737885
ZNF184	-1.0077	-1.01541	2.37953	0.11811	0.737885
A1BG-AS1	-1.11953	-1.13101	1.83904	0.118112	0.737885
IFT52	-0.48945	-0.490111	4.4925	0.118137	0.737885
TMEM143	-1.18845	-1.20067	1.83753	0.118158	0.737885
CENPK	-0.71603	-0.719871	4.08593	0.118218	0.737885
DDX1	0.329934	0.330006	7.13196	0.118573	0.738922
ILK	1.43047	1.46127	1.28767	0.118651	0.738922
EID2	0.527182	0.528218	4.1444	0.118659	0.738922
UBE2T	-0.593464	-0.596489	4.29171	0.118697	0.738922
ZNF605	0.57798	0.579229	3.81114	0.118734	0.738922
ULK3	-0.488252	-0.489057	4.49226	0.118762	0.738922
PTGER2	0.393008	0.393483	5.3157	0.118832	0.738966
ARHGAP27P1-BPTFP1-KPNA2P3	1.85406	1.92719	0.674582	0.118942	0.738969
LDLRAP1	-0.400117	-0.400421	5.2927	0.119025	0.738969
DTD2	-0.593006	-0.594224	3.98616	0.119114	0.738969
RPAP2	0.485246	0.486038	4.35303	0.119156	0.738969
ACOT8	0.507746	0.508592	4.19992	0.119177	0.738969
NAPA	-0.347947	-0.348076	6.32106	0.119229	0.738969
ZIC4	1.02301	1.02894	2.27407	0.119274	0.738969
COQ3	-0.909612	-0.917652	2.5927	0.119647	0.740524
LPP	0.31899	0.319012	8.87605	0.119651	0.740524
LDHA	-0.308146	-0.308148	10.2083	0.119783	0.740767
GBP2	-0.775555	-0.777635	4.3844	0.119858	0.740767
NAA16	0.30751	0.307515	10.1553	0.11988	0.740767
ENPP1	0.416487	0.416955	5.588	0.12002	0.741242
UCK1	0.471249	0.471844	4.5813	0.120101	0.741351
MSANTD3	-0.346371	-0.346544	6.15775	0.120421	0.742937
NXT2	0.898722	0.907025	2.61173	0.12054	0.743213
COMMD4	0.421161	0.421807	5.09555	0.120594	0.743213
MICB	-0.886756	-0.892036	2.70278	0.120711	0.743213
TMEM39B	0.524542	0.525259	4.14273	0.120806	0.743213
EML2	0.358126	0.358327	6.16058	0.120811	0.743213
TBP	-0.590555	-0.591679	4.01476	0.120907	0.743213
HIST1H2AC	0.918453	0.924614	2.59515	0.120983	0.743213
IQCN	0.886746	0.896783	2.76428	0.121072	0.743213
SIMC1	-0.590919	-0.592199	3.85328	0.121094	0.743213
ABCB8	0.391266	0.391492	5.71142	0.121148	0.743213
CCNF	0.548122	0.55081	4.64217	0.121176	0.743213
TPRG1L	-0.35323	-0.353392	6.09313	0.121227	0.743213
DEGS1	-0.321913	-0.321972	7.4962	0.12155	0.744251
DSG2	0.338593	0.338681	6.70227	0.121564	0.744251
TMTC4	0.560553	0.561689	4.04229	0.121628	0.744251
INTS6L	0.721311	0.723785	3.34494	0.12165	0.744251
GPR180	-0.36073	-0.360882	5.85916	0.121818	0.74489
TCAF1	0.368482	0.3688	5.77468	0.121916	0.7451
DCLK2	-0.840027	-0.843464	2.9748	0.122032	0.745422
TRAPPC2B	-1.39623	-1.42303	1.36461	0.122232	0.745568
LGR4	0.424122	0.424267	5.03981	0.122261	0.745568
SCAMP4	-0.383947	-0.384229	5.40317	0.122303	0.745568
ILKAP	-0.491313	-0.491935	4.42697	0.12237	0.745568
ERP44	-0.348926	-0.349053	6.12173	0.122525	0.745568
DBF4B	0.654638	0.65821	3.60537	0.122666	0.745568
GSDMB	0.636256	0.639938	3.99439	0.122712	0.745568
COX16	0.546913	0.548087	3.98841	0.122783	0.745568
MUC1	-1.53002	-1.57993	1.27185	0.122788	0.745568
MRPS5	0.375625	0.375867	5.68742	0.122903	0.745568
LPCAT3	-0.460542	-0.46113	4.67688	0.122916	0.745568
PC	0.446879	0.44749	4.7281	0.122933	0.745568
RBM23	0.378205	0.378436	5.63841	0.122962	0.745568
CBFB	-0.348732	-0.348852	6.47281	0.123008	0.745568
ZNF789	-0.777701	-0.779924	3.16509	0.12301	0.745568
AMH	2.28343	2.665	0.844529	0.123159	0.746082
LPXN	-0.830286	-0.834393	2.62966	0.123494	0.747724
OSGIN2	-0.448886	-0.449217	4.95074	0.123625	0.748132
TRIM5	-0.352861	-0.35307	5.798	0.123834	0.748873
STRADB	-0.42058	-0.420825	5.1706	0.123875	0.748873
GTDC1	-0.496038	-0.496739	4.30457	0.123988	0.749171
HDHD3	-0.772336	-0.775744	2.8911	0.124083	0.749358
TTN	1.13138	1.1433	1.86032	0.124244	0.749527
ITGB5	-0.319102	-0.319176	7.84565	0.124404	0.749527
SUMO3	-0.326608	-0.326676	7.09477	0.12461	0.749527
CLN8	0.384758	0.385057	5.29938	0.124657	0.749527
SS18L1	0.503175	0.503808	4.64496	0.124782	0.749527
ZNF230	-1.33301	-1.35312	1.36754	0.124842	0.749527
MGLL	-0.312089	-0.312125	8.40869	0.124938	0.749527
MRPL10	-0.456615	-0.457166	4.77049	0.125123	0.749527
USP53	0.374552	0.375066	5.59673	0.125207	0.749527
THAP8	1.03688	1.0451	2.16988	0.125303	0.749527
ZSWIM4	0.634823	0.63765	3.67255	0.125326	0.749527
FKRP	-0.370224	-0.370458	5.63551	0.125374	0.749527
BET1	0.39425	0.394585	5.36414	0.12539	0.749527
HEYL	3.94745	1.44269e+08	1.98275	0.125412	0.749527
ZNF613	1.4476	1.47478	1.09818	0.125449	0.749527
SH3BP5-AS1	1.08436	1.09357	2.05395	0.12549	0.749527
ESCO1	0.495863	0.496783	4.18301	0.125495	0.749527
ARHGAP11A	0.385578	0.386809	6.07839	0.125498	0.749527
SERPINE3	-1.22399	-1.23848	1.60114	0.125512	0.749527
TTC14	0.387897	0.388183	5.39786	0.125604	0.749527
TSR3	0.384896	0.385073	6.04629	0.125614	0.749527
GPR160	-1.27909	-1.30537	1.66337	0.125618	0.749527
SLC8A1-AS1	-0.953424	-0.961731	2.39961	0.125626	0.749527
PLEKHB2	-0.314993	-0.315035	7.77913	0.125646	0.749527
EIF1AD	-0.548815	-0.549704	4.14422	0.125824	0.749727
LPAR1	-0.324978	-0.325055	7.30707	0.12596	0.749727
MIA3	0.326743	0.326847	6.9652	0.126011	0.749727
TIMM13	0.398638	0.39893	5.50708	0.126097	0.749727
SSPN	1.46972	1.51764	1.32921	0.126101	0.749727
PEX19	-0.390715	-0.391028	5.28042	0.126107	0.749727
LAMP1	-0.30814	-0.308163	8.63834	0.126178	0.749727
WDHD1	-0.566614	-0.569412	4.59762	0.126191	0.749727
LRRC75A-AS1	0.313149	0.31319	7.90689	0.126278	0.749864
ERVK13-1	0.988258	1.00086	2.24357	0.126347	0.749894
AGPAT4	0.369713	0.369947	5.68199	0.126483	0.750031
USP46-AS1	-1.54723	-1.60274	1.07143	0.126498	0.750031
PCLO	-0.898675	-0.903893	2.512	0.126627	0.750414
LRRC45	0.620195	0.624331	3.78199	0.126703	0.750488
SLC35F2	-0.741818	-0.746769	3.08959	0.126832	0.75054
NCOA6	-0.356106	-0.356276	5.95694	0.12684	0.75054
ACLY	0.307091	0.307111	8.8174	0.126933	0.750708
BLOC1S2	-0.402766	-0.403085	5.22743	0.127342	0.751918
CC2D1A	0.38807	0.388338	5.57145	0.127361	0.751918
ZNF697	-0.379555	-0.379781	5.67644	0.127373	0.751918
NRM	1.12903	1.13667	1.93096	0.127493	0.751918
ARHGEF6	0.421282	0.421672	5.04654	0.127555	0.751918
UBAP2	-0.362374	-0.362582	5.81282	0.12757	0.751918
CENPU	0.718512	0.72944	4.07078	0.127659	0.751918
USP47	0.320878	0.320936	7.43858	0.12772	0.751918
ZSCAN21	-1.31215	-1.33124	1.48307	0.12774	0.751918
FKBP5	-0.335978	-0.336008	6.79424	0.127899	0.751918
SLC46A3	0.617356	0.618729	3.57442	0.127913	0.751918
MAGI3	0.579205	0.580381	3.94601	0.127943	0.751918
ZSCAN32	-0.680205	-0.682734	3.1635	0.127971	0.751918
EEF1A1P5	0.465377	0.465879	4.87117	0.128118	0.752405
ARHGEF9	0.412565	0.412853	5.25579	0.128217	0.752611
EXOSC3	0.553605	0.55487	4.08786	0.128338	0.752621
ZNF674	1.02376	1.03073	2.2979	0.128419	0.752621
[truncated: 9,723 more rows]
