# Supplementary material for: Single-PanIN-seq unveils that ARID1A deficiency promotes pancreatic tumorigenesis by attenuating KRAS-induced senescence
Source: eLife. 2021 May 13;10:e64204. doi: 10.7554/eLife.64204 (PMC8203294; doi:10.7554/eLife.64204)
Supplement: Supplementary file 7. [file elife-64204-supp7.xlsx]

## Sheet: Enhancer_increased
rank	motif_ID	consensus	p-value	adj_p-value	E-value
1	SRY_HUMAN.H11MO.0.B	YWTTGTTTH	2.1e-179	6e-175	2.41e-172
2	FOXJ2_HUMAN.H11MO.0.C	TGTTTRTTTW	2.58e-156	5.36e-152	2.16e-149
3	CDX1_HUMAN.H11MO.0.C	HTTTATGD	1.93e-119	3.33e-115	1.34e-112
4	FOXK1_HUMAN.H11MO.0.A	TGTTTMCHTT	3.98e-115	1.36e-110	5.45e-108
5	FOXO4_HUMAN.H11MO.0.C	TTGTTTAYK	3.07e-97	6.65e-93	2.67e-90
6	FOXA1_HUMAN.H11MO.0.A	TGTTTACWYWGB	8.66e-94	1.44e-89	5.79e-87
7	SOX5_HUMAN.H11MO.0.C	YATTGTTW	9.73e-94	1.65e-89	6.63e-87
8	FOXP1_HUMAN.H11MO.0.A	TBTGTTTMY	1.74e-72	5.92e-68	2.38e-65
9	FOXM1_HUMAN.H11MO.0.A	TGTTTRCTYWKB	9.58e-71	2.57e-66	1.03e-63
10	PIT1_HUMAN.H11MO.0.C	YTMATGAATATWY	8.19e-56	1.22e-51	4.9e-49
11	FOXA3_HUMAN.H11MO.0.B	CHTGTTTACWTWG	1.58e-53	2.23e-49	8.97e-47
12	TEAD4_HUMAN.H11MO.0.A	RCATTCCWGRVAK	1.88e-53	5.26e-49	2.12e-46
13	FOXJ3_HUMAN.H11MO.0.A	TTGTTTATKKTTW	1.62e-52	2.04e-48	8.19e-46
14	FOXC1_HUMAN.H11MO.0.C	CDWTGTTTACTTWRG	1.5e-50	9.27e-47	3.73e-44
15	PO2F1_HUMAN.H11MO.0.C	AWKBRWATGSAAWYAW	9.5e-47	1.39e-42	5.58e-40
16	FOXA2_HUMAN.H11MO.0.A	TGTTTACWYWGB	2.15e-45	3.11e-41	1.25e-38
17	HXB13_HUMAN.H11MO.0.A	TTTTATDGSH	2.82e-44	3.75e-40	1.51e-37
18	ANDR_HUMAN.H11MO.0.A	TGTTCTTKKYTGTTTRYW	5.59e-44	1.08e-39	4.33e-37
19	FOXP2_HUMAN.H11MO.0.C	BTGTTTACH	1.54e-42	3.39e-38	1.36e-35
20	TEAD1_HUMAN.H11MO.0.A	RCATTCCWGSCW	1.09e-39	2.76e-35	1.11e-32
21	IRF7_HUMAN.H11MO.0.C	GAAASYGAAA	7e-37	1.66e-32	6.68e-30
22	NFAC2_HUMAN.H11MO.0.B	TGGAAAAWY	3.42e-31	1.02e-26	4.1e-24
23	MEF2C_HUMAN.H11MO.0.A	DKCTATTTTTRGM	8.33e-30	1.26e-25	5.07e-23
24	FOXQ1_HUMAN.H11MO.0.C	HATTGTTTATTT	1.07e-27	4.37e-24	1.76e-21
25	MEF2A_HUMAN.H11MO.0.A	DKCTATTTTTRGM	8.03e-26	1.23e-21	4.93e-19
26	TBP_HUMAN.H11MO.0.A	MTATAAAARS	1.19e-25	1.35e-21	5.41e-19
27	FOXO3_HUMAN.H11MO.0.B	BYTGTTTACH	6.58e-25	1.22e-20	4.91e-18
28	MEF2B_HUMAN.H11MO.0.A	DKKKCTATTTTTRG	1.37e-24	2.41e-20	9.71e-18
29	NFAC4_HUMAN.H11MO.0.C	WGGAAAAYTW	9.56e-22	2.93e-17	1.18e-14
30	DBP_HUMAN.H11MO.0.B	VTTATGYAABM	4.72e-21	4.69e-17	1.89e-14
31	PO3F1_HUMAN.H11MO.0.C	VATKSWWATGCAAW	3.32e-20	3.83e-16	1.54e-13
32	PO2F2_HUMAN.H11MO.0.A	AYATGCAAATK	2.61e-20	4.27e-16	1.72e-13
33	CEBPE_HUMAN.H11MO.0.A	TTKCGHAATMTB	5.48e-20	5.35e-16	2.15e-13
34	GATA3_HUMAN.H11MO.0.A	RVAGATAAVAD	2.65e-19	7.17e-15	2.88e-12
35	NFAC3_HUMAN.H11MO.0.B	TGGAAAAHY	2.6e-18	6.45e-14	2.59e-11
36	HXC9_HUMAN.H11MO.0.C	WTTTATKGCH	1.54e-17	2.08e-13	8.36e-11
37	CDX2_HUMAN.H11MO.0.A	TTTTATTGCWBT	2.14e-17	3.04e-13	1.22e-10
38	HXA10_HUMAN.H11MO.0.C	KATRRTTTATGW	4.3e-17	3.74e-13	1.51e-10
39	PRRX2_HUMAN.H11MO.0.C	YTAATTR	7.12e-17	6.31e-13	2.54e-10
40	ALX1_HUMAN.H11MO.0.B	RTAATTRVATTA	4.6e-16	2.71e-12	1.09e-09
41	CEBPB_HUMAN.H11MO.0.A	DRTTRYGCAATM	2.59e-15	2.93e-11	1.18e-08
42	Z354A_HUMAN.H11MO.0.C	RTTTARWYCATTTACATTTAATGT	3.37e-15	3.31e-11	1.33e-08
43	HXA13_HUMAN.H11MO.0.C	GDTTTTATTGG	3.83e-15	3.79e-11	1.52e-08
44	PO5F1_HUMAN.H11MO.0.A	CYWTTSWYATGCAAAT	8.5e-15	8.27e-11	3.32e-08
45	CEBPA_HUMAN.H11MO.0.A	DRTTGTGCAAYV	1.44e-14	2.14e-10	8.6e-08
46	PRDM6_HUMAN.H11MO.0.C	RRRARGAAAAAAA	1.85e-14	7.07e-10	2.84e-07
47	EVX2_HUMAN.H11MO.0.A	KTTTTATKRCYBY	2.32e-11	2.27e-07	9.13e-05
48	ZNF8_HUMAN.H11MO.0.C	TGTGGTATATCCATACAATGGA	6.1e-10	6.01e-07	0.000241
49	FOXH1_HUMAN.H11MO.0.A	TGTGGATTS	9.72e-11	1.46e-06	0.000588
50	MEF2D_HUMAN.H11MO.0.A	DKCTATTTTTAG	1.45e-10	1.68e-06	0.000676
51	NKX32_HUMAN.H11MO.0.C	TTAAGTGBWT	2.83e-10	2.83e-06	0.00114
52	NANOG_HUMAN.H11MO.0.A	BYYWTTGWNATGCAAAT	2.69e-10	3.97e-06	0.0016
53	ZN250_HUMAN.H11MO.0.C	TACCATRCTGTTTTGRTTAC	1.49e-08	4.04e-06	0.00162
54	STA5B_HUMAN.H11MO.0.A	YTTCYKRGAAAY	1.77e-08	0.000297	0.119
55	ARI5B_HUMAN.H11MO.0.C	DBYKDGTATTSKR	1.94e-07	0.00208	0.835
56	TWST1_HUMAN.H11MO.0.A	MCATCTGKWWYYMATTA	3.34e-07	0.00344	1.38
57	CEBPG_HUMAN.H11MO.0.B	RTTGCATCAKHH	1.73e-06	0.0142	5.7
58	ZN260_HUMAN.H11MO.0.C	TTTWTATGGCTGCATAGTATTCCA	1.5e-05	0.0155	6.24
59	ATF4_HUMAN.H11MO.0.A	RRMTGATGCAAY	3.6e-06	0.0173	6.96
# AME (Analysis of Motif Enrichment): Version 5.1.1 compiled on Aug 2 2020 at 11:28:06
# The format of this file is described at http://meme-suite.org//doc/ame-output-format.html.
# ame --oc DP_up_distal --control distal_control_peak.fa DP_up_distal.fa /data1/yichi/meme/db/motif_databases/HUMAN/HOCOMOCOv11_core_HUMAN_mono_meme_format.meme

## Sheet: Enhancer_decreased
rank	motif_ID	consensus	p-value	adj_p-value	E-value
1	FOSB_HUMAN.H11MO.0.A	RTGAGTCAB	1.15e-227	4.38e-223	1.76e-220
2	FOS_HUMAN.H11MO.0.A	VTGAGTCAB	9.69e-221	3.47e-216	1.39e-213
3	JUN_HUMAN.H11MO.0.A	DRTGAGTCAYH	1.19e-198	3.64e-194	1.46e-191
4	FOSL1_HUMAN.H11MO.0.A	KRVTGAGTCAYH	1.92e-197	5.66e-193	2.27e-190
5	JUND_HUMAN.H11MO.0.A	RRTGAGTCAYY	9.71e-197	3.03e-192	1.22e-189
6	JUNB_HUMAN.H11MO.0.A	DVTGAGTCABH	8.35e-191	2.76e-186	1.11e-183
7	FOSL2_HUMAN.H11MO.0.A	NDRTGAGTCAYH	3.19e-181	9.56e-177	3.84e-174
8	FEV_HUMAN.H11MO.0.B	GCVGGAAGYG	4.74e-109	1.48e-104	5.96e-102
9	NFE2_HUMAN.H11MO.0.A	VVRTGACTCAGCA	3.13e-93	5.67e-89	2.28e-86
10	NF2L1_HUMAN.H11MO.0.C	HGTCATN	2.45e-86	7.26e-82	2.92e-79
11	BACH2_HUMAN.H11MO.0.A	TGCTGAGTCAB	4.57e-83	1.08e-78	4.32e-76
12	RARG_HUMAN.H11MO.0.B	RGGTCASVRTGVCMTGRV	3.92e-82	7.86e-78	3.16e-75
13	TBX21_HUMAN.H11MO.0.A	GDGDRGGTGTGRV	4.24e-76	1.53e-71	6.17e-69
14	SRBP2_HUMAN.H11MO.0.B	VSGTGGGGWGABG	1.35e-75	3.87e-71	1.56e-68
15	ETV4_HUMAN.H11MO.0.B	VRCAGGAARBR	1.68e-74	6.54e-70	2.63e-67
16	ZIC1_HUMAN.H11MO.0.B	KGGGWGGTS	3.99e-71	1.01e-66	4.05e-64
17	ETV1_HUMAN.H11MO.0.A	SRCCGGAAGYG	4.61e-69	5.96e-65	2.39e-62
18	NR1H4_HUMAN.H11MO.0.B	RRGGKCAVTGRCCBSGVGG	6.96e-69	8.08e-65	3.25e-62
19	SMAD3_HUMAN.H11MO.0.B	SYCTSHCWSCWS	1.55e-62	6.49e-58	2.61e-55
20	ETS1_HUMAN.H11MO.0.A	RRRCMGGAAGTGG	9.35e-62	1.97e-57	7.92e-55
21	MAFB_HUMAN.H11MO.0.B	TGCTGASTYAD	7.74e-62	2.6e-57	1.05e-54
22	BACH1_HUMAN.H11MO.0.A	TGCTGAGTCABSS	1.69e-61	3.35e-57	1.35e-54
23	RXRA_HUMAN.H11MO.0.A	VRGDVRGNVARAGGTCARRG	8.45e-58	2.73e-53	1.1e-50
24	NKX25_HUMAN.H11MO.0.B	KKRAGWGS	2.46e-57	9.26e-53	3.72e-50
25	GABPA_HUMAN.H11MO.0.A	GVVRCCGGAAGTGV	1.92e-55	1.79e-51	7.18e-49
26	SALL4_HUMAN.H11MO.0.B	GSDGGGWGGG	1.66e-54	5.38e-50	2.16e-47
27	SRBP1_HUMAN.H11MO.0.A	DGTSRGGTGAB	1.01e-53	2.42e-49	9.71e-47
28	ZN563_HUMAN.H11MO.0.C	RGGNTCMTNDCHGGCAGCTGY	1.71e-53	3.31e-49	1.33e-46
29	CLOCK_HUMAN.H11MO.0.C	CWGHCACGTGMVVM	4.22e-52	9.03e-48	3.63e-45
30	AP2B_HUMAN.H11MO.0.B	GCCYGVGGGS	1.59e-50	2.82e-46	1.13e-43
31	ELF2_HUMAN.H11MO.0.C	RAVCCGGAAGTGR	1.12e-49	1.69e-45	6.8e-43
32	COT1_HUMAN.H11MO.0.C	GRGGKSARAGGTCAGGG	1.02e-49	2.43e-45	9.76e-43
33	ATF1_HUMAN.H11MO.0.B	HRRTGACGYMA	9.11e-49	6.12e-45	2.46e-42
34	TBX3_HUMAN.H11MO.0.C	DRAGGTGBSAR	9.76e-49	3.3e-44	1.33e-41
35	NR1D1_HUMAN.H11MO.0.B	RRRNMASTGGGTCAGDRDR	2.74e-48	8.81e-44	3.54e-41
36	PBX3_HUMAN.H11MO.0.A	TGABTGRCRGS	6.31e-48	1.11e-43	4.48e-41
37	NFKB2_HUMAN.H11MO.0.B	GGGRAAKYCCC	1.38e-45	1.89e-41	7.61e-39
38	NFIC_HUMAN.H11MO.0.A	CYTGGCHBYMWGCCARG	1.38e-45	3.09e-41	1.24e-38
39	RORG_HUMAN.H11MO.0.C	RRAASTRGGTCA	1.98e-45	4.38e-41	1.76e-38
40	ELK1_HUMAN.H11MO.0.B	RCCGGAAGTGV	5.54e-45	4.52e-41	1.82e-38
41	ERG_HUMAN.H11MO.0.A	RRRSAGGAAGYGG	3.3e-45	9.4e-41	3.78e-38
42	RORA_HUMAN.H11MO.0.C	AWSTRGGTCARRG	1.36e-44	4.01e-40	1.61e-37
43	LYL1_HUMAN.H11MO.0.A	CCAKCTGYTYYCTB	2.24e-43	8.73e-39	3.51e-36
44	ZBT7A_HUMAN.H11MO.0.A	VRGGGKCKY	8.61e-43	1.35e-38	5.41e-36
45	ZN554_HUMAN.H11MO.0.C	GCWGAGYCANGTRGDKKRCT	1.38e-42	2.75e-38	1.1e-35
46	SUH_HUMAN.H11MO.0.A	VSYSTGGGAAV	1.32e-41	3.82e-37	1.54e-34
47	THAP1_HUMAN.H11MO.0.C	SGCCGCCATSTYGGSYBCGGGC	4.07e-41	4.43e-37	1.78e-34
48	NF2L2_HUMAN.H11MO.0.A	WWYTGCTGAGTCAT	8.36e-41	9.83e-37	3.95e-34
49	ELF1_HUMAN.H11MO.0.A	VRACCCGGAAGTGS	1.63e-40	2.12e-36	8.51e-34
50	NR2C2_HUMAN.H11MO.0.B	GSTYMVRGGTCA	6.36e-39	6.47e-35	2.6e-32
51	SP3_HUMAN.H11MO.0.B	SGVVGGGGGCGGGGCBRGSS	1.28e-38	2.52e-34	1.01e-31
52	ITF2_HUMAN.H11MO.0.C	DGCAGSTGKS	3.52e-38	1.04e-33	4.17e-31
53	TGIF1_HUMAN.H11MO.0.A	TGACAGS	6.99e-38	2.17e-33	8.72e-31
54	KLF5_HUMAN.H11MO.0.A	WGGGTGKGGCDGGG	1.39e-37	3.05e-33	1.23e-30
55	MYF6_HUMAN.H11MO.0.C	CASCTGC	1.64e-37	3.17e-33	1.27e-30
56	THA_HUMAN.H11MO.0.C	RGGTCABYTSAGGTCAK	6.96e-37	1.59e-32	6.4e-30
57	ELK4_HUMAN.H11MO.0.A	SVCCGGAAGTGV	2.99e-36	1.88e-32	7.55e-30
58	ESR2_HUMAN.H11MO.0.A	RGGTCASCSTGMCCY	6.34e-36	8.7e-32	3.5e-29
59	MXI1_HUMAN.H11MO.0.A	VCACGTGGSNGSBGS	1.75e-35	2.08e-31	8.37e-29
60	ETV5_HUMAN.H11MO.0.C	RRRSAGGAARDGRV	1.2e-35	4.86e-31	1.95e-28
61	PBX1_HUMAN.H11MO.0.A	TGABTGACAG	2.52e-35	4.86e-31	1.96e-28
62	SP2_HUMAN.H11MO.0.A	GGSSVGGGGGCGGGGCCDGSGS	3.81e-34	5.67e-30	2.28e-27
63	EGR1_HUMAN.H11MO.0.A	VDRDGCGKGGGYGGRRR	3.25e-33	7.53e-29	3.03e-26
64	NFIA_HUMAN.H11MO.0.C	TTGGCHNRNWGCCAR	8.99e-33	1.75e-28	7.03e-26
65	ETV2_HUMAN.H11MO.0.B	RRARRCAGGAARYRGS	2.34e-32	4.26e-28	1.71e-25
66	ZN667_HUMAN.H11MO.0.C	GTGSCYTTMARAGCTCMBC	2.98e-32	5.28e-28	2.12e-25
67	E2F4_HUMAN.H11MO.0.A	SRGGGCGGGAARD	6.56e-32	6.83e-28	2.74e-25
68	ZN320_HUMAN.H11MO.0.C	GKGGGDCCMGGGGGCCWRTG	9.51e-32	7.45e-28	2.99e-25
69	STF1_HUMAN.H11MO.0.B	SYYCAAGGYCA	7.09e-31	1.42e-26	5.72e-24
70	KLF6_HUMAN.H11MO.0.A	GSRRGGGHGGGGMHGGGRV	5.85e-31	1.52e-26	6.11e-24
71	TF65_HUMAN.H11MO.0.A	HWGGGRATTTCCMV	2.08e-30	2.05e-26	8.25e-24
72	ZIC3_HUMAN.H11MO.0.B	GGCYHCCTGCTGWGH	2.2e-30	3.5e-26	1.41e-23
73	SP4_HUMAN.H11MO.0.A	SRGVARGRGGCGGRGCHDRR	1.65e-30	4.01e-26	1.61e-23
74	KLF1_HUMAN.H11MO.0.A	DGGGYGKGGCYGGG	3.43e-30	4.86e-26	1.95e-23
75	ATF3_HUMAN.H11MO.0.A	GGTSACGTGAB	7.63e-30	4.97e-26	2e-23
76	RELB_HUMAN.H11MO.0.C	RGGGRMTTTCCM	5.01e-30	7.08e-26	2.85e-23
77	HTF4_HUMAN.H11MO.0.A	DSCAGSTGKG	4.88e-30	1.32e-25	5.3e-23
78	PPARG_HUMAN.H11MO.0.A	MWSTRGGKSARAGGKCA	6.7e-30	1.44e-25	5.81e-23
79	ISL1_HUMAN.H11MO.0.A	VCTAATKGV	7.82e-30	2.11e-25	8.47e-23
80	REL_HUMAN.H11MO.0.B	DRWRGGGRAATKCCA	2.03e-29	4.33e-25	1.74e-22
81	IKZF1_HUMAN.H11MO.0.C	BTGGGARR	4.93e-29	1.77e-24	7.1e-22
82	RXRB_HUMAN.H11MO.0.C	TSAGGTCASR	9.01e-29	2.01e-24	8.09e-22
83	ZBT48_HUMAN.H11MO.0.C	YHAGGGACCRKS	1.36e-28	2.53e-24	1.02e-21
84	HIF1A_HUMAN.H11MO.0.C	GDACGTGM	5.08e-28	3.07e-24	1.23e-21
85	PATZ1_HUMAN.H11MO.0.C	GGGGMGGGGGMKGGRRVGGVRG	1.52e-28	3.79e-24	1.53e-21
86	SMAD2_HUMAN.H11MO.0.A	TGTCTGNCWCCT	1.88e-28	5.57e-24	2.24e-21
87	PTF1A_HUMAN.H11MO.0.B	SCAGCTGBYBBYBYYCHC	1.44e-27	3.16e-23	1.27e-20
88	PKNX1_HUMAN.H11MO.0.B	TGABTGRCAGS	2.41e-27	3.48e-23	1.4e-20
89	E2F7_HUMAN.H11MO.0.B	GDGGCGGGAARDR	1.35e-27	3.55e-23	1.43e-20
90	E2F3_HUMAN.H11MO.0.A	DDGGCGGGAAA	1.58e-27	4.48e-23	1.8e-20
91	KLF3_HUMAN.H11MO.0.B	GGRGVDGGGCGGGGCYGGG	4.26e-27	6.76e-23	2.72e-20
92	TFDP1_HUMAN.H11MO.0.C	RRRRGGCGGGAARN	7.67e-27	1.3e-22	5.22e-20
93	COT2_HUMAN.H11MO.0.A	CARAGGTCARRGD	2.59e-26	5.85e-22	2.35e-19
94	ZN335_HUMAN.H11MO.0.A	RGCTGYCYNBVSCKMTGCCTGW	7.04e-26	7.6e-22	3.05e-19
95	CREB1_HUMAN.H11MO.0.A	NRRTGACGTMA	1.76e-25	1.11e-21	4.44e-19
96	VDR_HUMAN.H11MO.0.A	RRGGTCABYGRGKTCA	1.27e-25	1.62e-21	6.5e-19
97	KLF12_HUMAN.H11MO.0.C	VGGGGCGGGGC	1.6e-25	1.67e-21	6.73e-19
98	SMAD4_HUMAN.H11MO.0.B	CWGTCTGDCACCT	8.47e-25	1.83e-20	7.34e-18
99	ESR1_HUMAN.H11MO.0.A	AGGTCASMSTGACCY	1.75e-24	1.94e-20	7.8e-18
100	PDX1_HUMAN.H11MO.0.A	TGATTGATK	1.22e-24	2.31e-20	9.27e-18
101	RFX5_HUMAN.H11MO.0.A	GTCABCWGTTGCYRGGSARA	9.31e-24	1.13e-19	4.55e-17
102	ZFX_HUMAN.H11MO.0.A	SCAGGCCBCR	1.24e-23	1.98e-19	7.98e-17
103	E2F6_HUMAN.H11MO.0.A	DGGGCGGGARRVR	4.95e-23	1.17e-18	4.69e-16
104	ZN449_HUMAN.H11MO.0.C	TGGTTGGGCTB	1.04e-22	1.59e-18	6.4e-16
105	KLF4_HUMAN.H11MO.0.A	WGGGYGKGGC	1.38e-22	1.84e-18	7.39e-16
106	TFE2_HUMAN.H11MO.0.A	SMCAGCTGCWB	1.09e-21	1.96e-17	7.89e-15
107	ATF2_HUMAN.H11MO.0.B	RRTGABGTCAY	1.39e-21	2.08e-17	8.37e-15
108	ZN281_HUMAN.H11MO.0.A	RGGWGGGGGAGGGGV	1.79e-21	2.8e-17	1.13e-14
109	MZF1_HUMAN.H11MO.0.B	RRDRGGGAWTKRR	1.33e-21	3.71e-17	1.49e-14
110	ZN322_HUMAN.H11MO.0.B	GWGCCTGSTACWSWGCCTGR	7.74e-21	9.46e-17	3.8e-14
111	ZBT17_HUMAN.H11MO.0.A	SRRGGWGGGGGAGGGGMRR	3.92e-21	1.27e-16	5.11e-14
112	VEZF1_HUMAN.H11MO.0.C	GGRRRRGRRGGAGGGGGRGRRR	5.82e-21	1.79e-16	7.2e-14
113	ELF5_HUMAN.H11MO.0.A	VGRASSAGGAAGTRV	1.12e-20	2.56e-16	1.03e-13
114	THB_HUMAN.H11MO.0.C	GRSSYSASVTSAGGTCA	2.01e-20	2.58e-16	1.04e-13
115	EGR2_HUMAN.H11MO.0.A	GRGRRKGWGKGGGHGGRG	2.05e-20	5.35e-16	2.15e-13
116	Z324A_HUMAN.H11MO.0.C	KVTCAAACCATCCTTKSCTKSCW	2.93e-20	6.29e-16	2.53e-13
117	EHF_HUMAN.H11MO.0.B	VWACSAGGAAGTDVS	5.4e-20	8.43e-16	3.39e-13
118	ZEB1_HUMAN.H11MO.0.A	BVCAGGTGWG	1.31e-19	3.13e-15	1.26e-12
119	RARA_HUMAN.H11MO.0.A	GGRRGRTSMRRAGKTCAAGG	2.97e-19	5.4e-15	2.17e-12
120	NR2C1_HUMAN.H11MO.0.C	GSYVAGAGGTCAB	9.57e-19	1e-14	4.02e-12
121	ERR2_HUMAN.H11MO.0.A	YCAAGGTCA	8.74e-19	1.1e-14	4.41e-12
122	E2F1_HUMAN.H11MO.0.A	RRNKGGCGGGAARR	1.04e-18	1.15e-14	4.63e-12
123	PPARA_HUMAN.H11MO.0.B	AWSTRGGKSAAAGGTCA	6.75e-19	1.26e-14	5.05e-12
124	PEBB_HUMAN.H11MO.0.C	TYTGTGGTYWB	1.28e-18	2.74e-14	1.1e-11
125	EPAS1_HUMAN.H11MO.0.B	VTACGTGMC	7.68e-18	3.33e-14	1.34e-11
126	MECP2_HUMAN.H11MO.0.C	SCCGGRR	4.62e-18	3.91e-14	1.57e-11
127	BMAL1_HUMAN.H11MO.0.A	KSCACGTGHSY	6.97e-18	7.73e-14	3.11e-11
128	MAFF_HUMAN.H11MO.0.B	TGCTGASTCAGCABTTTT	4.07e-18	8.94e-14	3.59e-11
129	ZSC31_HUMAN.H11MO.0.C	RGCAGCAGGGCARTTAKR	1.06e-17	1.54e-13	6.2e-11
130	NFKB1_HUMAN.H11MO.0.A	AGGGAAAK	4.45e-18	1.79e-13	7.19e-11
131	ARNT_HUMAN.H11MO.0.B	STACGTGMC	4.18e-17	1.82e-13	7.33e-11
132	USF2_HUMAN.H11MO.0.A	GGGTCACGTGRBSVSSSSB	5.24e-17	1.96e-13	7.87e-11
133	ERR1_HUMAN.H11MO.0.A	BYCAAGGTCAMABWV	1.99e-17	2.07e-13	8.34e-11
134	KLF9_HUMAN.H11MO.0.C	GRRGKGGGCGTGGCC	4.26e-17	2.53e-13	1.02e-10
135	AP2C_HUMAN.H11MO.0.A	VTGSCCTGRGGSHR	2.05e-17	3.05e-13	1.23e-10
136	AP2A_HUMAN.H11MO.0.A	ATKSCCTGRGGSHAD	2.63e-17	4.58e-13	1.84e-10
137	KLF8_HUMAN.H11MO.0.C	CAGGGKGTG	6.35e-17	6.42e-13	2.58e-10
138	NR5A2_HUMAN.H11MO.0.B	KBYCAAGGYCA	5.03e-17	6.96e-13	2.8e-10
139	BHE40_HUMAN.H11MO.0.A	DGCACGTGAS	1.88e-16	1.27e-12	5.09e-10
140	TFAP4_HUMAN.H11MO.0.A	YCAGCTGWKB	1.69e-16	2.64e-12	1.06e-09
141	ZBTB6_HUMAN.H11MO.0.C	GGWGMTGGAGCCD	3.89e-16	5.97e-12	2.4e-09
142	FLI1_HUMAN.H11MO.0.A	SRRGGMAGGAAGGRRRGR	4.62e-16	1.28e-11	5.14e-09
143	ZN341_HUMAN.H11MO.0.C	GRGGRRRRGGRGRRGGAASAGC	7.68e-16	2.25e-11	9.04e-09
144	ETS2_HUMAN.H11MO.0.B	RDVRGGAARVRRR	9.96e-16	4.22e-11	1.7e-08
145	TAF1_HUMAN.H11MO.0.A	RARRWGGCGGMGGMGR	2.46e-15	6.2e-11	2.49e-08
146	WT1_HUMAN.H11MO.0.C	RGGVGGGGGAGGRGGVGGRG	3.71e-15	6.98e-11	2.8e-08
147	MAF_HUMAN.H11MO.0.A	VAAWBTGCTGASTHWGCMD	5.68e-15	1.37e-10	5.49e-08
148	MYCN_HUMAN.H11MO.0.A	RGCCACGTGSDS	1.91e-14	1.55e-10	6.22e-08
149	MYOG_HUMAN.H11MO.0.B	CHSCAGCTGYYYB	1.51e-14	2.04e-10	8.19e-08
150	MAX_HUMAN.H11MO.0.A	VRGCACGTGG	5.27e-14	5.76e-10	2.32e-07
151	ZNF76_HUMAN.H11MO.0.C	RRKGCMTKCTGGGARWTGTAGT	6.96e-14	6.31e-10	2.54e-07
152	ELF3_HUMAN.H11MO.0.A	RAABVAGGAAGTRR	3.31e-14	6.94e-10	2.79e-07
153	KLF15_HUMAN.H11MO.0.A	RGGGMGGRGVDGGGGGRGG	3.61e-14	7.2e-10	2.9e-07
154	MAFK_HUMAN.H11MO.0.A	RAWWHTGCTGASTCAGCA	1.04e-13	7.48e-10	3.01e-07
155	ZN467_HUMAN.H11MO.0.C	GGGGAGGGGRRGGRGRRGGRRR	2.59e-13	5.39e-09	2.17e-06
156	NR1H3_HUMAN.H11MO.0.B	CHRRGGTYACTNNAGGTCA	4.92e-13	8.96e-09	3.6e-06
157	ASCL1_HUMAN.H11MO.0.A	CHVCASCTGCYBYY	7.12e-13	1.19e-08	4.8e-06
158	ZN708_HUMAN.H11MO.0.C	GCCTAATAARBAGGYACAGC	6.24e-12	3.71e-08	1.49e-05
159	SP1_HUMAN.H11MO.0.A	VGGGGGCGGGGCCKGGGGGGGG	1.12e-11	5.49e-08	2.21e-05
160	MAZ_HUMAN.H11MO.0.A	GGGGGAGGGGGDGRGRRRGRRG	1.94e-12	5.55e-08	2.23e-05
161	STAT4_HUMAN.H11MO.0.A	YTTCYYRGMAV	2.46e-12	6.29e-08	2.53e-05
162	NFYC_HUMAN.H11MO.0.A	BBRRCCAATCAGMR	9.36e-12	8.9e-08	3.58e-05
163	HXB4_HUMAN.H11MO.0.B	YTAATGRC	5.33e-12	9.56e-08	3.84e-05
164	HIC1_HUMAN.H11MO.0.C	GGGKTGCCC	1.09e-11	1.18e-07	4.76e-05
165	OSR2_HUMAN.H11MO.0.C	GBYSCWGCTNCTGYDG	5.15e-12	1.26e-07	5.05e-05
166	ZN816_HUMAN.H11MO.0.C	AAARAAGGGGGACATGYWGGG	1.55e-11	1.4e-07	5.62e-05
167	TFE3_HUMAN.H11MO.0.B	RGTCACGTGA	2.66e-11	1.54e-07	6.19e-05
168	CREM_HUMAN.H11MO.0.C	CRVTGACGTCA	3.08e-11	2.19e-07	8.8e-05
169	OLIG2_HUMAN.H11MO.0.B	CCAKCTGYTYYYYWBCHB	1.09e-11	3e-07	0.000121
170	CUX1_HUMAN.H11MO.0.C	RBRSBDATCGATSK	1.78e-10	5.62e-07	0.000226
171	PAX6_HUMAN.H11MO.0.C	TYMYGCTTSABT	4.07e-11	6.62e-07	0.000266
172	NKX21_HUMAN.H11MO.0.A	BTKGAGTGSY	3.26e-11	7.92e-07	0.000318
173	HNF4G_HUMAN.H11MO.0.B	VRGKBCAAAGKYCA	7.25e-11	8.96e-07	0.00036
174	NR1I3_HUMAN.H11MO.0.C	RRGGTCARVRRAGTTCAD	1.61e-10	1.15e-06	0.000464
175	MAFG_HUMAN.H11MO.0.A	RWWWNTGCTGASTCAGCA	3.93e-10	1.37e-06	0.000551
176	NR4A1_HUMAN.H11MO.0.A	AAAGGKCAV	5.55e-11	2.06e-06	0.000828
177	ZN263_HUMAN.H11MO.0.A	GGGAGGAGGRRGRGGRGGRR	9.09e-11	2.13e-06	0.000854
178	SNAI1_HUMAN.H11MO.0.C	SCAGGTGK	1.6e-10	2.35e-06	0.000946
179	HEN1_HUMAN.H11MO.0.C	BGGGKMKCAGCTGCGKCCYY	6.59e-10	2.49e-06	0.000999
180	MYB_HUMAN.H11MO.0.A	RVWGRCAGTTRR	1.46e-10	2.49e-06	0.000999
181	ATOH1_HUMAN.H11MO.0.B	RRCAGMTGG	1.32e-10	2.53e-06	0.00102
182	MITF_HUMAN.H11MO.0.A	TCACGTGACC	9.87e-10	7.24e-06	0.00291
183	MYOD1_HUMAN.H11MO.0.A	VCAGCTGYYBCYGBC	6.22e-10	8.34e-06	0.00335
184	BHA15_HUMAN.H11MO.0.B	SSAGCAGCTGG	7.22e-10	1.24e-05	0.00499
185	NFYB_HUMAN.H11MO.0.A	YRRCCAATSAGMR	2.15e-09	1.25e-05	0.00501
186	MEIS1_HUMAN.H11MO.0.A	RTGATTKATKRB	9.63e-10	1.28e-05	0.00515
187	NFYA_HUMAN.H11MO.0.A	BYRRCCAATCAGAR	2.99e-09	1.99e-05	0.008
188	DBP_HUMAN.H11MO.0.B	VTTATGYAABM	1.6e-09	2.01e-05	0.00809
189	RUNX2_HUMAN.H11MO.0.A	KGKYTGTGGTTTKK	8.15e-10	2.08e-05	0.00838
190	REST_HUMAN.H11MO.0.A	TTCAGCACCAYGGACAGCKCCM	1.69e-08	2.83e-05	0.0114
191	ZN331_HUMAN.H11MO.0.C	GGCTGGGCTCAGCTGGGTGG	1.33e-08	2.83e-05	0.0114
192	NR4A2_HUMAN.H11MO.0.C	AAAGGTCAS	2.3e-09	3.64e-05	0.0147
193	ZN549_HUMAN.H11MO.0.C	WTTCATGAAYTGGGCAGCAY	1.81e-08	9.87e-05	0.0397
194	ZN547_HUMAN.H11MO.0.C	TGCTAATKCWGCARGCABRC	2e-08	0.000112	0.0449
195	USF1_HUMAN.H11MO.0.A	RGTCACGTGRBS	3.32e-08	0.000137	0.0549
196	GLI3_HUMAN.H11MO.0.B	BTGGGTGGTCY	1.98e-08	0.000178	0.0717
197	ZBT18_HUMAN.H11MO.0.C	KCCAGMTGTKB	8.5e-09	0.000188	0.0755
198	ZN768_HUMAN.H11MO.0.C	GAGGCHCAGAGAGGTTAAGT	3.38e-08	0.000228	0.0916
199	ZN134_HUMAN.H11MO.0.C	GCCTSRHCTMATCAGKTGAAGG	4.9e-08	0.000299	0.12
200	RFX1_HUMAN.H11MO.0.B	SSSSCBGTTGCCAKGGVRACSS	6.15e-08	0.000335	0.134
201	TFEB_HUMAN.H11MO.0.C	RGTCACGTG	5.03e-07	0.000531	0.214
202	MYC_HUMAN.H11MO.0.A	RCCACGTGCTB	1.03e-07	0.000994	0.399
203	BRAC_HUMAN.H11MO.0.A	YTVRCAKSDARGTGTGAADT	7.73e-08	0.00132	0.529
204	ZNF18_HUMAN.H11MO.0.C	GGTGTGAACHSR	1.44e-07	0.00173	0.697
205	SPI1_HUMAN.H11MO.0.A	RRAAAGAGGAAGTGRVD	1.35e-07	0.00223	0.898
206	P73_HUMAN.H11MO.0.A	RRRCAWGYCCARRCWTGYC	2.05e-07	0.00233	0.937
207	NDF2_HUMAN.H11MO.0.B	RRCAGATGG	1.17e-07	0.00241	0.968
208	STA5A_HUMAN.H11MO.0.A	TTCYRRGAAR	2.31e-07	0.00324	1.3
209	SOX3_HUMAN.H11MO.0.B	BCCWTTGTBYB	1.5e-07	0.00395	1.59
210	INSM1_HUMAN.H11MO.0.C	TGTMAGGGGGCR	1.93e-06	0.0055	2.21
211	STAT3_HUMAN.H11MO.0.A	SAYTTCCMRGAA	4.1e-07	0.00672	2.7
212	ERR3_HUMAN.H11MO.0.B	TCAAGGTCA	7.98e-07	0.00765	3.07
213	P63_HUMAN.H11MO.0.A	DRCAWGYCCAGRCWTGYYB	2e-06	0.0122	4.9
214	HNF4A_HUMAN.H11MO.0.A	RRGKBCAAAGTCCA	1.35e-06	0.0122	4.92
215	MBD2_HUMAN.H11MO.0.B	SSGKCCGGMGR	5.63e-06	0.0177	7.12
216	STAT1_HUMAN.H11MO.0.A	YCCVTTTCCHGGAAAWCHC	2.51e-06	0.023	9.23
# AME (Analysis of Motif Enrichment): Version 5.1.1 compiled on Aug 2 2020 at 11:28:06
# The format of this file is described at http://meme-suite.org//doc/ame-output-format.html.
# ame --oc DP_down_enhancer --control distal_control_peak.fa DP_down_enhancer.fa /data1/yichi/meme/db/motif_databases/HUMAN/HOCOMOCOv11_core_HUMAN_mono_meme_format.meme

## Sheet: Promoter_increased
rank	motif_ID	motif_alt_ID	consensus	p-value	adj_p-value	E-value
1	FOXK1_HUMAN.H11MO.0.A		TGTTTMCHTT	7.98e-19	7.9e-15	3.18e-12
2	SRY_HUMAN.H11MO.0.B		YWTTGTTTH	1.18e-16	1.08e-12	4.32e-10
3	CDX1_HUMAN.H11MO.0.C		HTTTATGD	3.07e-16	1.68e-12	6.73e-10
4	FOXP1_HUMAN.H11MO.0.A		TBTGTTTMY	9.12e-16	9.91e-12	3.98e-09
5	FOXA1_HUMAN.H11MO.0.A		TGTTTACWYWGB	1.23e-12	6.17e-09	2.48e-06
6	TEAD4_HUMAN.H11MO.0.A		RCATTCCWGRVAK	6.95e-12	4.89e-08	1.97e-05
7	SOX5_HUMAN.H11MO.0.C		YATTGTTW	1.95e-11	9.64e-08	3.88e-05
8	FOXP2_HUMAN.H11MO.0.C		BTGTTTACH	4.86e-11	3.07e-07	0.000123
9	FOXA3_HUMAN.H11MO.0.B		CHTGTTTACWTWG	8.18e-11	3.46e-07	0.000139
10	FOXA2_HUMAN.H11MO.0.A		TGTTTACWYWGB	4.37e-10	1.92e-06	0.000771
11	FOXM1_HUMAN.H11MO.0.A		TGTTTRCTYWKB	3.46e-10	2.72e-06	0.00109
12	MEF2B_HUMAN.H11MO.0.A		DKKKCTATTTTTRG	8.53e-10	5.79e-06	0.00233
13	FOXO3_HUMAN.H11MO.0.B		BYTGTTTACH	2.06e-09	1.23e-05	0.00495
14	NANOG_HUMAN.H11MO.0.A		BYYWTTGWNATGCAAAT	3.3e-09	1.51e-05	0.00606
15	NFAC4_HUMAN.H11MO.0.C		WGGAAAAYTW	2.88e-09	3.08e-05	0.0124
16	MEF2C_HUMAN.H11MO.0.A		DKCTATTTTTRGM	6.64e-09	3.68e-05	0.0148
17	FOXO4_HUMAN.H11MO.0.C		TTGTTTAYK	7.6e-09	5.1e-05	0.0205
18	MEF2A_HUMAN.H11MO.0.A		DKCTATTTTTRGM	1.2e-08	6.97e-05	0.028
19	FOXJ2_HUMAN.H11MO.0.C		TGTTTRTTTW	1.4e-08	9.11e-05	0.0366
20	SOX2_HUMAN.H11MO.0.A		BBCCTTTGTYYYB	2.77e-08	0.000299	0.12
21	LEF1_HUMAN.H11MO.0.A		BCCTTTSWWNTBYH	2.33e-08	0.000327	0.132
22	ANDR_HUMAN.H11MO.0.A		TGTTCTTKKYTGTTTRYW	1.36e-07	0.00092	0.37
23	HXB13_HUMAN.H11MO.0.A		TTTTATDGSH	2.05e-07	0.00095	0.382
24	TEAD1_HUMAN.H11MO.0.A		RCATTCCWGSCW	1.65e-07	0.00106	0.424
25	GATA3_HUMAN.H11MO.0.A		RVAGATAAVAD	1.36e-07	0.00114	0.459
26	DBP_HUMAN.H11MO.0.B		VTTATGYAABM	4.61e-07	0.00127	0.51
27	SMCA1_HUMAN.H11MO.0.C		CMARGAAGMATD	1.63e-07	0.00158	0.633
28	PO3F1_HUMAN.H11MO.0.C		VATKSWWATGCAAW	4.77e-07	0.00169	0.679
29	NR4A1_HUMAN.H11MO.0.A		AAAGGKCAV	2.36e-07	0.00264	1.06
30	HXC9_HUMAN.H11MO.0.C		WTTTATKGCH	9.06e-07	0.00348	1.4
31	PIT1_HUMAN.H11MO.0.C		YTMATGAATATWY	8.25e-07	0.00375	1.51
32	BATF3_HUMAN.H11MO.0.B		BRSTTTCADTWTGASWM	9.11e-07	0.00432	1.73
33	CDX2_HUMAN.H11MO.0.A		TTTTATTGCWBT	1.29e-06	0.00495	1.99
34	ZN394_HUMAN.H11MO.0.C		NRARWRGAAWNGAMWGRAAK	4.27e-07	0.00497	2
35	NFAC2_HUMAN.H11MO.0.B		TGGAAAAWY	5.27e-07	0.00517	2.08
36	PRDM6_HUMAN.H11MO.0.C		RRRARGAAAAAAA	5.82e-07	0.00753	3.03
37	PO2F2_HUMAN.H11MO.0.A		AYATGCAAATK	3.8e-06	0.0157	6.32
38	NKX61_HUMAN.H11MO.0.B		GAYWAATKRSHWWTTAATK	5.81e-06	0.0218	8.77
39	ARI5B_HUMAN.H11MO.0.C		DBYKDGTATTSKR	7.96e-06	0.0242	9.74
# AME (Analysis of Motif Enrichment): Version 5.1.1 compiled on Aug 2 2020 at 11:28:06
# The format of this file is described at http://meme-suite.org//doc/ame-output-format.html.
# ame --oc DP_up_promoter --control promoter_control_peak.fa DP_up_promoter.fa /data1/yichi/meme/db/motif_databases/HUMAN/HOCOMOCOv11_core_HUMAN_mono_meme_format.meme

## Sheet: Promoter_decreased
rank	motif_ID	consensus	p-value	adj_p-value	E-value
1	FOSB_HUMAN.H11MO.0.A	RTGAGTCAB	5.22e-49	4.31e-45	1.73e-42
2	FOS_HUMAN.H11MO.0.A	VTGAGTCAB	4.64e-47	3.44e-43	1.38e-40
3	JUND_HUMAN.H11MO.0.A	RRTGAGTCAYY	3.67e-46	2.4e-42	9.64e-40
4	JUN_HUMAN.H11MO.0.A	DRTGAGTCAYH	2.77e-44	1.74e-40	6.99e-38
5	JUNB_HUMAN.H11MO.0.A	DVTGAGTCABH	2.89e-44	2.06e-40	8.26e-38
6	FOSL1_HUMAN.H11MO.0.A	KRVTGAGTCAYH	1.92e-41	1.19e-37	4.79e-35
7	FOSL2_HUMAN.H11MO.0.A	NDRTGAGTCAYH	9.76e-40	5.98e-36	2.4e-33
8	BACH2_HUMAN.H11MO.0.A	TGCTGAGTCAB	2.26e-25	1.23e-21	4.95e-19
9	MAFB_HUMAN.H11MO.0.B	TGCTGASTYAD	6.58e-25	6.12e-21	2.46e-18
10	NFE2_HUMAN.H11MO.0.A	VVRTGACTCAGCA	3.81e-20	1.58e-16	6.35e-14
11	SMAD3_HUMAN.H11MO.0.B	SYCTSHCWSCWS	3.98e-20	6.34e-16	2.55e-13
12	TBX21_HUMAN.H11MO.0.A	GDGDRGGTGTGRV	1.54e-16	2.18e-12	8.78e-10
13	RORG_HUMAN.H11MO.0.C	RRAASTRGGTCA	3.05e-14	1.75e-10	7.03e-08
14	ETV4_HUMAN.H11MO.0.B	VRCAGGAARBR	2.06e-14	3.06e-10	1.23e-07
15	BACH1_HUMAN.H11MO.0.A	TGCTGAGTCABSS	2.53e-13	1.59e-09	6.37e-07
16	NF2L1_HUMAN.H11MO.0.C	HGTCATN	4.44e-12	2.98e-08	1.2e-05
17	LYL1_HUMAN.H11MO.0.A	CCAKCTGYTYYCTB	2.4e-11	3.65e-07	0.000147
18	HTF4_HUMAN.H11MO.0.A	DSCAGSTGKG	3.57e-11	3.7e-07	0.000149
19	SMAD2_HUMAN.H11MO.0.A	TGTCTGNCWCCT	5.64e-11	5.78e-07	0.000232
20	TGIF1_HUMAN.H11MO.0.A	TGACAGS	3.9e-10	3.97e-06	0.00159
21	TF65_HUMAN.H11MO.0.A	HWGGGRATTTCCMV	1.18e-09	4.47e-06	0.0018
22	NF2L2_HUMAN.H11MO.0.A	WWYTGCTGAGTCAT	4.36e-09	1.09e-05	0.0044
23	RUNX2_HUMAN.H11MO.0.A	KGKYTGTGGTTTKK	1.69e-09	1.36e-05	0.00548
24	RARG_HUMAN.H11MO.0.B	RGGTCASVRTGVCMTGRV	2.4e-09	1.58e-05	0.00634
25	RORA_HUMAN.H11MO.0.C	AWSTRGGTCARRG	4.21e-09	4.22e-05	0.017
26	RUNX1_HUMAN.H11MO.0.A	BYTGTGGTTWB	1.33e-08	7.5e-05	0.0302
27	MYF6_HUMAN.H11MO.0.C	CASCTGC	1.45e-08	0.000127	0.0512
28	NKX25_HUMAN.H11MO.0.B	KKRAGWGS	1.63e-08	0.000249	0.1
29	ITF2_HUMAN.H11MO.0.C	DGCAGSTGKS	2.3e-08	0.000269	0.108
30	CLOCK_HUMAN.H11MO.0.C	CWGHCACGTGMVVM	6.31e-08	0.000428	0.172
31	NFIC_HUMAN.H11MO.0.A	CYTGGCHBYMWGCCARG	5.2e-08	0.000456	0.183
32	SRBP1_HUMAN.H11MO.0.A	DGTSRGGTGAB	5.31e-08	0.000464	0.187
33	RXRB_HUMAN.H11MO.0.C	TSAGGTCASR	6.95e-08	0.000506	0.204
34	ZEB1_HUMAN.H11MO.0.A	BVCAGGTGWG	5.71e-08	0.000526	0.211
35	MAFF_HUMAN.H11MO.0.B	TGCTGASTCAGCABTTTT	1.11e-07	0.000693	0.279
36	NFIA_HUMAN.H11MO.0.C	TTGGCHNRNWGCCAR	1.21e-07	0.000723	0.291
37	RXRA_HUMAN.H11MO.0.A	VRGDVRGNVARAGGTCARRG	8.92e-08	0.00125	0.502
38	NR1D1_HUMAN.H11MO.0.B	RRRNMASTGGGTCAGDRDR	1.3e-07	0.00146	0.586
39	RUNX3_HUMAN.H11MO.0.A	BYTGTGGTTW	2.87e-07	0.00155	0.623
40	PTF1A_HUMAN.H11MO.0.B	SCAGCTGBYBBYBYYCHC	2.21e-07	0.00203	0.816
41	MZF1_HUMAN.H11MO.0.B	RRDRGGGAWTKRR	2.42e-07	0.00286	1.15
42	ETV5_HUMAN.H11MO.0.C	RRRSAGGAARDGRV	2.09e-07	0.00335	1.35
43	TFAP4_HUMAN.H11MO.0.A	YCAGCTGWKB	5.85e-07	0.00368	1.48
44	ATOH1_HUMAN.H11MO.0.B	RRCAGMTGG	6.39e-07	0.00453	1.82
45	ISL1_HUMAN.H11MO.0.A	VCTAATKGV	6.1e-07	0.00469	1.89
46	PBX1_HUMAN.H11MO.0.A	TGABTGACAG	1.02e-06	0.00707	2.84
47	MAFK_HUMAN.H11MO.0.A	RAWWHTGCTGASTCAGCA	8.71e-06	0.0145	5.83
48	PDX1_HUMAN.H11MO.0.A	TGATTGATK	2.91e-06	0.0159	6.41
# AME (Analysis of Motif Enrichment): Version 5.1.1 compiled on Aug 2 2020 at 11:28:06
# The format of this file is described at http://meme-suite.org//doc/ame-output-format.html.
# ame --oc DP_down_promoter --control promoter_control_peak.fa DP_down_promoter.fa /data1/yichi/meme/db/motif_databases/HUMAN/HOCOMOCOv11_core_HUMAN_mono_meme_format.meme
