# Supplementary material for: Single-PanIN-seq unveils that ARID1A deficiency promotes pancreatic tumorigenesis by attenuating KRAS-induced senescence
Source: eLife. 2021 May 13;10:e64204. doi: 10.7554/eLife.64204 (PMC8203294; doi:10.7554/eLife.64204)
Supplement: Supplementary file 9. [file elife-64204-supp9.xlsx]

## Sheet: Enhancer 1
Transcription_factor	ALDH1A1_high_binding	ALDH1A1_high_total	ALDH1A1_low_binding	ALDH1A1_low_total
POLR2A	0	50	0	130
CEBPA	0	3	0	0
CTCF	0	27	0	61
HNF4A	0	4	0	2
NR2C2	0	5	0	0
RAD21	0	14	0	22
STAG1	0	2	0	6
FOS	0	3	0	1
GATA1	0	14	0	0
JUN	0	6	0	0
MYC	0	13	0	7
NFYA	0	1	0	0
NFYB	0	1	0	0
PRAME	0	1	0	0
ZNF263	0	2	0	0
ESR1	0	1	0	130
FOXA1	0	23	0	34
GATA3	0	1	0	19
TFAP2A	0	0	0	3
TFAP2C	0	0	0	3
AR	0	55	0	0
ERG	1	18	0	0
EP300	24	29	0	17
NR5A2	0	0	0	1
FAIRE	0	3	0	4
H2AZ	0	7	0	15
MECP2	0	0	0	1
FOXM1	0	0	0	7
CTBP1	0	0	0	3
CHD1	0	3	0	1
PTPN11	0	1	0	0
PAF1	0	1	0	8
ZNF143	0	2	0	0
GREB1	0	0	0	3
NR2F2	0	2	0	2
E2F4	0	0	0	1
TLE3	0	0	0	1
KLF4	0	0	0	1
NR3C1	29	32	0	7
CREB1	2	12	0	0
FOXA2	2	2	0	0
ICE1	0	0	0	2
ZC3H8	0	2	0	1
KMT2B	0	0	0	1
BRD4	0	10	0	9
BRD2	0	3	0	0
BRD3	0	3	0	0
KDM1A	0	5	0	0
PHF8	0	2	0	0
HDAC2	0	8	0	1
RBBP5	0	2	0	0
HDAC1	0	5	0	0
MAX	0	7	0	2
CEBPB	23	37	0	2
TCF7L2	0	2	0	3
MAZ	0	2	0	0
TBP	0	2	0	0
SREBF1	0	1	0	2
ESRRA	0	1	0	0
RCOR1	0	3	0	2
MAFF	0	2	0	0
CHD2	0	2	0	0
USF2	0	5	0	0
ARID3A	0	3	0	0
BHLHE40	0	3	0	0
MXI1	0	2	0	0
MAFK	0	3	0	0
SMC3	0	4	0	0
HSF1	0	1	0	0
RFX5	0	2	0	0
JUND	0	3	0	2
ATF1	0	8	0	0
TAL1	0	9	0	0
TBL1XR1	0	2	0	0
GTF2F1	0	1	0	0
HCFC1	0	1	0	2
CCNT2	0	1	0	0
BACH1	0	3	0	0
NFE2	0	2	0	0
STAT1	0	1	0	0
ZMIZ1	0	1	0	0
HMGN3	0	1	0	0
ZNF384	0	1	0	0
IRF1	0	5	0	0
POLR3A	0	1	0	0
CUX1	0	3	0	2
SMARCA4	0	5	0	1
SMARCB1	0	1	0	0
ZNF274	0	1	0	0
ELK1	0	3	0	1
STAT2	0	1	0	0
ZNF217	0	0	0	1
SIX5	0	3	0	0
ATF3	0	4	0	3
SIN3A	0	4	0	5
ELF1	0	7	0	2
SP1	0	4	0	4
USF1	0	3	0	1
TCF12	0	2	0	1
ETS1	0	2	0	0
REST	0	5	0	3
E2F6	0	1	0	0
FOSL2	1	27	0	3
ZBTB33	0	6	0	1
TEAD4	0	3	0	2
TAF1	0	2	0	1
GABPA	0	12	0	1
PBX3	0	1	0	0
YY1	0	1	0	1
CBX3	0	1	0	1
SRF	0	4	0	2
FOSL1	0	3	0	1
EGR1	0	1	0	2
ZBTB7A	0	7	0	0
CEBPD	0	2	0	0
HNF4G	0	3	0	0
NFIC	0	2	0	0
MYBL2	0	1	0	0
ZEB1	0	1	0	0
MBD4	0	1	0	0
STAT5A	0	1	0	0
MEF2A	0	1	0	0
SP2	0	1	0	0
BCLAF1	0	1	0	0
TAF7	0	3	0	0
GATA2	0	3	0	0
CTCFL	0	1	0	2
PML	0	1	0	1
TRIM28	0	1	0	1
THAP1	0	1	0	0
KDM5B	0	0	0	3
SMAD3	0	1	0	0
MBD2	0	2	0	7
SFPQ	0	0	0	1
RARG	0	0	0	2
RARA	0	0	0	1
MED1	0	5	0	5
SCML2	0	1	0	0
FOXP1	0	1	0	0
PIAS1	0	5	0	0
ASH2L	0	2	0	0
SUMO2	0	24	0	0
RELA	0	4	0	4
PR	0	0	0	6
LMTK3	0	0	0	1
NCAPG	0	0	0	3
NCAPG2	0	0	0	1
TCF4	0	0	0	1
SPI1	0	6	0	0
APOBEC3B	0	0	0	1
CDK8	0	1	0	0
KRAB	0	1	0	0
LARP7	0	2	0	1
HEXIM1	0	0	0	1
ZEB2	0	4	0	0
ID3	0	1	0	0
ZNF175	0	2	0	0
BCL3	6	29	0	0
TFDP1	0	2	0	0
PLRG1	0	2	0	0
TARDBP	0	2	0	0
RFX1	0	2	0	4
CHAMP1	0	2	0	0
RNF2	0	6	0	0
HES2	11	13	0	0
RAD51	0	4	0	0
NBN	0	2	0	2
KAT8	0	1	0	0
HLTF	0	2	0	0
HES1	0	1	0	0
CREB3	0	2	0	0
CEBPG	0	2	0	2
ZNF207	0	1	0	1
ZNF24	0	6	0	0
ZMYM3	0	9	0	1
TFAP4	0	2	0	0
MLLT1	0	4	0	1
MTA2	0	4	0	0
PKNOX1	0	2	0	0
CDC5L	0	2	0	0
KLF9	0	0	0	2
PTRF	0	1	0	0
COPS2	0	1	0	0
NRF1	0	8	0	4
ZNF584	0	2	0	0
ARNT	0	2	0	0
ZBTB11	0	4	0	2
DNMT3B	0	2	0	0
SMARCE1	0	2	0	0
DIDO1	0	2	0	0
FOXK2	0	6	0	0
ZSCAN29	0	2	0	0
ZNF766	0	2	0	0
HDGF	0	4	0	0
TRIM25	0	2	0	0
DPF2	0	2	0	1
ZBTB40	0	4	0	2
ZNF83	0	2	0	0
MBD1_isoform2	0	2	0	0
MNT	0	2	0	0
PBX2	0	6	0	0
GABP	0	2	0	0
ETV1	0	2	0	0
IKZF1	0	6	0	0
PTTG1	0	2	0	0
NKRF	0	2	0	0
ZNF318	0	3	0	0
LEF1	0	2	0	0
C11orf30	0	2	0	0
DDX20	0	4	0	0
DEAF1	0	1	0	0
GATAD2B	0	0	0	2
MTA3	0	0	0	2
MBD1_isoform1	0	2	0	0
CSDE1	0	2	0	0
PYGO2	0	2	0	0
SUZ12	0	1	0	0
MIER1	0	2	0	0
ADNP	0	2	0	0
TCF7	0	4	0	0
SOX13	0	2	0	0
ZKSCAN8	0	2	0	0
ZKSCAN1	0	2	0	2
NR2F6	0	4	0	0
HLF	0	2	0	0
L3MBTL2	0	2	0	0
GTF2E2	0	1	0	0
KLF1	0	2	0	0
SSRP1	0	2	0	0
ZNF197	0	2	0	0
RUNX1	0	2	0	0
GATA4	0	3	0	0
ZNF512	0	2	0	0
ZNF589	0	2	0	0
KLF13	0	2	0	0
HBP1	0	2	0	0
HINFP	0	2	0	0
NFE2L1	0	1	0	0
TEAD2	0	2	0	0
KDM4B	0	2	0	0
MEF2D	0	2	0	0
HHEX	0	2	0	0
NFRKB	0	2	0	0
ATF4	0	2	0	0
ZNF592	0	0	0	2
E2F5	0	2	0	0
ETV4	0	2	0	0
ZNF644	0	2	0	0
MYNN	0	2	0	0
ZNF740	0	2	0	0
HMBOX1	0	1	0	0
KLF16	0	2	0	0
JUNB	0	3	0	0
YBX1	0	2	0	2
HNF1A	0	2	0	0
BCOR	0	2	0	0
MAFG	0	2	0	0
CBX1	0	4	0	0
HDAC8	0	1	0	0
ZNF639	0	4	0	0
FOXJ2	0	2	0	0
SUPT5H	0	2	0	0
SMARCA5	0	2	0	0
ZNF687	0	0	0	2
CREM	0	2	0	0
TRIM24	0	4	0	0
NONO	0	0	0	1
ZFX	0	2	0	4
IRF9	0	2	0	0
NCOA1	0	2	0	0
NR2F1	0	2	0	0
DNMT1	0	2	0	0
TGIF2	0	2	0	0
ATRX	0	1	0	0
KAT5	0	1	0	0
TOP1	0	0	0	1
NELFE	0	0	0	12
TCF7L1	0	0	0	2
SMC1A	0	4	0	4
NIPBL	0	3	0	4
SMARCC1	0	0	0	1
ORC2	0	1	0	0
ASCL1	0	1	0	0
GRHL2	0	0	0	7
HEY1	0	2	0	0
KMT2D	0	0	0	1
MEN1	0	0	0	2
SPDEF	0	2	0	0
NKX2-1	0	3	0	0
RUNX2	0	0	0	2
KLF10	0	1	0	1
SMAD4	0	3	0	0
TSC22D4	0	1	0	0
ZBTB2	0	1	0	0
ZNF18	0	1	0	0
RUVBL1	0	1	0	0
FOXO3	0	2	0	0
EZH2	0	3	0	0
NFIL3	0	1	0	0
EPC1	0	1	0	0
MBTD1	0	1	0	0
CNOT3	0	0	0	1
ZSCAN2	0	1	0	1
DPF1	0	0	0	1
ZXDC	0	0	0	1
ZNF75A	0	0	0	1
ZNF701	0	0	0	1
WDHD1	0	0	0	2
NFIA	0	1	0	0
L3MBTL4	0	1	0	0
MKL2	0	2	0	0
KDM3B	0	0	0	1
TP53	0	0	0	1
SATB1	0	1	0	0
DNMT3A	0	0	0	1
FAM208A	0	1	0	0
HOXB13	0	6	0	0
FLI1	1	2	0	0
ZNF711	0	0	0	1
EWSR1	0	4	0	0
PHIP	0	0	0	3
AHR	0	0	0	1
T	0	0	0	4
INO80	0	1	0	0
ARID1A	0	0	0	1

## Sheet: Enhancer 2
Transcription_factor	ALDH1A1_high_binding	ALDH1A1_high_total	ALDH1A1_low_binding	ALDH1A1_low_total
POLR2A	0	50	0	130
CEBPA	0	3	0	0
CTCF	0	27	0	61
HNF4A	0	4	0	2
NR2C2	0	5	0	0
RAD21	0	14	0	22
STAG1	0	2	0	6
FOS	0	3	0	1
GATA1	0	14	0	0
JUN	0	6	0	0
MYC	0	13	0	7
NFYA	0	1	0	0
NFYB	0	1	0	0
PRAME	0	1	0	0
ZNF263	0	2	0	0
ESR1	0	1	0	130
FOXA1	0	23	0	34
GATA3	0	1	0	19
TFAP2A	0	0	0	3
TFAP2C	0	0	0	3
AR	0	55	0	0
ERG	0	18	0	0
EP300	0	29	0	17
NR5A2	0	0	0	1
FAIRE	0	3	0	4
H2AZ	0	7	0	15
MECP2	0	0	0	1
FOXM1	0	0	0	7
CTBP1	0	0	0	3
CHD1	0	3	0	1
PTPN11	0	1	0	0
PAF1	0	1	0	8
ZNF143	0	2	0	0
GREB1	0	0	0	3
NR2F2	0	2	0	2
E2F4	0	0	0	1
TLE3	0	0	0	1
KLF4	0	0	0	1
NR3C1	0	32	0	7
CREB1	0	12	0	0
FOXA2	0	2	0	0
ICE1	0	0	0	2
ZC3H8	0	2	0	1
KMT2B	0	0	0	1
BRD4	0	10	0	9
BRD2	0	3	0	0
BRD3	0	3	0	0
KDM1A	0	5	0	0
PHF8	0	2	0	0
HDAC2	0	8	0	1
RBBP5	0	2	0	0
HDAC1	0	5	0	0
MAX	0	7	0	2
CEBPB	0	37	0	2
TCF7L2	0	2	0	3
MAZ	0	2	0	0
TBP	0	2	0	0
SREBF1	0	1	0	2
ESRRA	0	1	0	0
RCOR1	0	3	0	2
MAFF	0	2	0	0
CHD2	0	2	0	0
USF2	0	5	0	0
ARID3A	0	3	0	0
BHLHE40	0	3	0	0
MXI1	0	2	0	0
MAFK	0	3	0	0
SMC3	0	4	0	0
HSF1	0	1	0	0
RFX5	0	2	0	0
JUND	0	3	0	2
ATF1	0	8	0	0
TAL1	0	9	0	0
TBL1XR1	0	2	0	0
GTF2F1	0	1	0	0
HCFC1	0	1	0	2
CCNT2	0	1	0	0
BACH1	0	3	0	0
NFE2	0	2	0	0
STAT1	0	1	0	0
ZMIZ1	0	1	0	0
HMGN3	0	1	0	0
ZNF384	0	1	0	0
IRF1	0	5	0	0
POLR3A	0	1	0	0
CUX1	0	3	0	2
SMARCA4	0	5	0	1
SMARCB1	0	1	0	0
ZNF274	0	1	0	0
ELK1	0	3	0	1
STAT2	0	1	0	0
ZNF217	0	0	0	1
SIX5	0	3	0	0
ATF3	0	4	0	3
SIN3A	0	4	0	5
ELF1	0	7	0	2
SP1	0	4	0	4
USF1	0	3	0	1
TCF12	0	2	0	1
ETS1	0	2	0	0
REST	0	5	0	3
E2F6	0	1	0	0
FOSL2	0	27	0	3
ZBTB33	0	6	0	1
TEAD4	0	3	0	2
TAF1	0	2	0	1
GABPA	0	12	0	1
PBX3	0	1	0	0
YY1	0	1	0	1
CBX3	0	1	0	1
SRF	0	4	0	2
FOSL1	0	3	0	1
EGR1	0	1	0	2
ZBTB7A	0	7	0	0
CEBPD	0	2	0	0
HNF4G	0	3	0	0
NFIC	0	2	0	0
MYBL2	0	1	0	0
ZEB1	0	1	0	0
MBD4	0	1	0	0
STAT5A	0	1	0	0
MEF2A	0	1	0	0
SP2	0	1	0	0
BCLAF1	0	1	0	0
TAF7	0	3	0	0
GATA2	0	3	0	0
CTCFL	0	1	0	2
PML	0	1	0	1
TRIM28	0	1	0	1
THAP1	0	1	0	0
KDM5B	0	0	0	3
SMAD3	0	1	0	0
MBD2	0	2	0	7
SFPQ	0	0	0	1
RARG	0	0	0	2
RARA	0	0	0	1
MED1	0	5	0	5
SCML2	0	1	0	0
FOXP1	0	1	0	0
PIAS1	0	5	0	0
ASH2L	0	2	0	0
SUMO2	0	24	0	0
RELA	0	4	0	4
PR	0	0	0	6
LMTK3	0	0	0	1
NCAPG	0	0	0	3
NCAPG2	0	0	0	1
TCF4	0	0	0	1
SPI1	0	6	0	0
APOBEC3B	0	0	0	1
CDK8	0	1	0	0
KRAB	0	1	0	0
LARP7	0	2	0	1
HEXIM1	0	0	0	1
ZEB2	0	4	0	0
ID3	0	1	0	0
ZNF175	0	2	0	0
BCL3	0	29	0	0
TFDP1	0	2	0	0
PLRG1	0	2	0	0
TARDBP	0	2	0	0
RFX1	0	2	0	4
CHAMP1	0	2	0	0
RNF2	0	6	0	0
HES2	0	13	0	0
RAD51	0	4	0	0
NBN	0	2	0	2
KAT8	0	1	0	0
HLTF	0	2	0	0
HES1	0	1	0	0
CREB3	0	2	0	0
CEBPG	0	2	0	2
ZNF207	0	1	0	1
ZNF24	0	6	0	0
ZMYM3	0	9	0	1
TFAP4	0	2	0	0
MLLT1	0	4	0	1
MTA2	0	4	0	0
PKNOX1	0	2	0	0
CDC5L	0	2	0	0
KLF9	0	0	0	2
PTRF	0	1	0	0
COPS2	0	1	0	0
NRF1	0	8	0	4
ZNF584	0	2	0	0
ARNT	0	2	0	0
ZBTB11	0	4	0	2
DNMT3B	0	2	0	0
SMARCE1	0	2	0	0
DIDO1	0	2	0	0
FOXK2	0	6	0	0
ZSCAN29	0	2	0	0
ZNF766	0	2	0	0
HDGF	0	4	0	0
TRIM25	0	2	0	0
DPF2	0	2	0	1
ZBTB40	0	4	0	2
ZNF83	0	2	0	0
MBD1_isoform2	0	2	0	0
MNT	0	2	0	0
PBX2	0	6	0	0
GABP	0	2	0	0
ETV1	0	2	0	0
IKZF1	0	6	0	0
PTTG1	0	2	0	0
NKRF	0	2	0	0
ZNF318	0	3	0	0
LEF1	0	2	0	0
C11orf30	0	2	0	0
DDX20	0	4	0	0
DEAF1	0	1	0	0
GATAD2B	0	0	0	2
MTA3	0	0	0	2
MBD1_isoform1	0	2	0	0
CSDE1	0	2	0	0
PYGO2	0	2	0	0
SUZ12	0	1	0	0
MIER1	0	2	0	0
ADNP	0	2	0	0
TCF7	0	4	0	0
SOX13	0	2	0	0
ZKSCAN8	0	2	0	0
ZKSCAN1	0	2	0	2
NR2F6	0	4	0	0
HLF	0	2	0	0
L3MBTL2	0	2	0	0
GTF2E2	0	1	0	0
KLF1	0	2	0	0
SSRP1	0	2	0	0
ZNF197	0	2	0	0
RUNX1	0	2	0	0
GATA4	0	3	0	0
ZNF512	0	2	0	0
ZNF589	0	2	0	0
KLF13	0	2	0	0
HBP1	0	2	0	0
HINFP	0	2	0	0
NFE2L1	0	1	0	0
TEAD2	0	2	0	0
KDM4B	0	2	0	0
MEF2D	0	2	0	0
HHEX	0	2	0	0
NFRKB	0	2	0	0
ATF4	0	2	0	0
ZNF592	0	0	0	2
E2F5	0	2	0	0
ETV4	0	2	0	0
ZNF644	0	2	0	0
MYNN	0	2	0	0
ZNF740	0	2	0	0
HMBOX1	0	1	0	0
KLF16	0	2	0	0
JUNB	0	3	0	0
YBX1	0	2	0	2
HNF1A	0	2	0	0
BCOR	0	2	0	0
MAFG	0	2	0	0
CBX1	0	4	0	0
HDAC8	0	1	0	0
ZNF639	0	4	0	0
FOXJ2	0	2	0	0
SUPT5H	0	2	0	0
SMARCA5	0	2	0	0
ZNF687	0	0	0	2
CREM	0	2	0	0
TRIM24	0	4	0	0
NONO	0	0	0	1
ZFX	0	2	0	4
IRF9	0	2	0	0
NCOA1	0	2	0	0
NR2F1	0	2	0	0
DNMT1	0	2	0	0
TGIF2	0	2	0	0
ATRX	0	1	0	0
KAT5	0	1	0	0
TOP1	0	0	0	1
NELFE	0	0	0	12
TCF7L1	0	0	0	2
SMC1A	0	4	0	4
NIPBL	0	3	0	4
SMARCC1	0	0	0	1
ORC2	0	1	0	0
ASCL1	0	1	0	0
GRHL2	0	0	0	7
HEY1	0	2	0	0
KMT2D	0	0	0	1
MEN1	0	0	0	2
SPDEF	0	2	0	0
NKX2-1	1	3	0	0
RUNX2	0	0	0	2
KLF10	0	1	0	1
SMAD4	0	3	0	0
TSC22D4	0	1	0	0
ZBTB2	0	1	0	0
ZNF18	0	1	0	0
RUVBL1	0	1	0	0
FOXO3	0	2	0	0
EZH2	0	3	0	0
NFIL3	0	1	0	0
EPC1	0	1	0	0
MBTD1	0	1	0	0
CNOT3	0	0	0	1
ZSCAN2	0	1	0	1
DPF1	0	0	0	1
ZXDC	0	0	0	1
ZNF75A	0	0	0	1
ZNF701	0	0	0	1
WDHD1	0	0	0	2
NFIA	0	1	0	0
L3MBTL4	0	1	0	0
MKL2	0	2	0	0
KDM3B	0	0	0	1
TP53	0	0	0	1
SATB1	0	1	0	0
DNMT3A	0	0	0	1
FAM208A	0	1	0	0
HOXB13	0	6	0	0
FLI1	1	2	0	0
ZNF711	0	0	0	1
EWSR1	0	4	0	0
PHIP	0	0	0	3
AHR	0	0	0	1
T	0	0	0	4
INO80	0	1	0	0
ARID1A	0	0	0	1

## Sheet: Enhancer 3
Transcription_factor	ALDH1A1_high_binding	ALDH1A1_high_total	ALDH1A1_low_binding	ALDH1A1_low_total
POLR2A	0	50	0	130
CEBPA	0	3	0	0
CTCF	23	27	60	61
HNF4A	0	4	0	2
NR2C2	0	5	0	0
RAD21	13	14	17	22
STAG1	2	2	6	6
FOS	0	3	0	1
GATA1	0	14	0	0
JUN	0	6	0	0
MYC	0	13	0	7
NFYA	0	1	0	0
NFYB	0	1	0	0
PRAME	0	1	0	0
ZNF263	0	2	0	0
ESR1	0	1	0	130
FOXA1	7	23	0	34
GATA3	0	1	0	19
TFAP2A	0	0	0	3
TFAP2C	0	0	0	3
AR	3	55	0	0
ERG	1	18	0	0
EP300	1	29	0	17
NR5A2	0	0	0	1
FAIRE	0	3	0	4
H2AZ	0	7	1	15
MECP2	0	0	0	1
FOXM1	0	0	0	7
CTBP1	0	0	0	3
CHD1	0	3	0	1
PTPN11	0	1	0	0
PAF1	0	1	0	8
ZNF143	0	2	0	0
GREB1	0	0	0	3
NR2F2	0	2	0	2
E2F4	0	0	0	1
TLE3	0	0	0	1
KLF4	0	0	0	1
NR3C1	0	32	0	7
CREB1	6	12	0	0
FOXA2	1	2	0	0
ICE1	0	0	0	2
ZC3H8	0	2	0	1
KMT2B	0	0	0	1
BRD4	0	10	0	9
BRD2	0	3	0	0
BRD3	0	3	0	0
KDM1A	0	5	0	0
PHF8	0	2	0	0
HDAC2	0	8	0	1
RBBP5	0	2	0	0
HDAC1	0	5	0	0
MAX	1	7	1	2
CEBPB	7	37	1	2
TCF7L2	0	2	0	3
MAZ	0	2	0	0
TBP	0	2	0	0
SREBF1	0	1	0	2
ESRRA	0	1	0	0
RCOR1	0	3	0	2
MAFF	0	2	0	0
CHD2	0	2	0	0
USF2	0	5	0	0
ARID3A	1	3	0	0
BHLHE40	0	3	0	0
MXI1	0	2	0	0
MAFK	0	3	0	0
SMC3	2	4	0	0
HSF1	0	1	0	0
RFX5	0	2	0	0
JUND	1	3	0	2
ATF1	1	8	0	0
TAL1	0	9	0	0
TBL1XR1	0	2	0	0
GTF2F1	0	1	0	0
HCFC1	0	1	0	2
CCNT2	0	1	0	0
BACH1	0	3	0	0
NFE2	0	2	0	0
STAT1	0	1	0	0
ZMIZ1	0	1	0	0
HMGN3	0	1	0	0
ZNF384	0	1	0	0
IRF1	0	5	0	0
POLR3A	0	1	0	0
CUX1	0	3	0	2
SMARCA4	0	5	0	1
SMARCB1	0	1	0	0
ZNF274	0	1	0	0
ELK1	0	3	0	1
STAT2	0	1	0	0
ZNF217	0	0	0	1
SIX5	0	3	0	0
ATF3	0	4	2	3
SIN3A	0	4	0	5
ELF1	2	7	1	2
SP1	0	4	0	4
USF1	0	3	0	1
TCF12	0	2	0	1
ETS1	0	2	0	0
REST	0	5	0	3
E2F6	1	1	0	0
FOSL2	0	27	0	3
ZBTB33	2	6	0	1
TEAD4	0	3	0	2
TAF1	0	2	0	1
GABPA	3	12	1	1
PBX3	0	1	0	0
YY1	0	1	1	1
CBX3	0	1	1	1
SRF	2	4	0	2
FOSL1	0	3	0	1
EGR1	0	1	0	2
ZBTB7A	0	7	0	0
CEBPD	0	2	0	0
HNF4G	0	3	0	0
NFIC	0	2	0	0
MYBL2	0	1	0	0
ZEB1	0	1	0	0
MBD4	0	1	0	0
STAT5A	0	1	0	0
MEF2A	0	1	0	0
SP2	0	1	0	0
BCLAF1	0	1	0	0
TAF7	0	3	0	0
GATA2	0	3	0	0
CTCFL	0	1	0	2
PML	0	1	0	1
TRIM28	0	1	0	1
THAP1	0	1	0	0
KDM5B	0	0	0	3
SMAD3	0	1	0	0
MBD2	0	2	0	7
SFPQ	0	0	0	1
RARG	0	0	0	2
RARA	0	0	0	1
MED1	0	5	0	5
SCML2	0	1	0	0
FOXP1	0	1	0	0
PIAS1	0	5	0	0
ASH2L	0	2	0	0
SUMO2	0	24	0	0
RELA	1	4	0	4
PR	0	0	0	6
LMTK3	0	0	0	1
NCAPG	0	0	0	3
NCAPG2	0	0	0	1
TCF4	0	0	0	1
SPI1	0	6	0	0
APOBEC3B	0	0	0	1
CDK8	0	1	0	0
KRAB	0	1	0	0
LARP7	0	2	0	1
HEXIM1	0	0	0	1
ZEB2	0	4	0	0
ID3	0	1	0	0
ZNF175	0	2	0	0
BCL3	0	29	0	0
TFDP1	0	2	0	0
PLRG1	0	2	0	0
TARDBP	0	2	0	0
RFX1	0	2	0	4
CHAMP1	0	2	0	0
RNF2	0	6	0	0
HES2	0	13	0	0
RAD51	0	4	0	0
NBN	0	2	0	2
KAT8	0	1	0	0
HLTF	0	2	0	0
HES1	0	1	0	0
CREB3	0	2	0	0
CEBPG	0	2	0	2
ZNF207	0	1	0	1
ZNF24	0	6	0	0
ZMYM3	0	9	0	1
TFAP4	0	2	0	0
MLLT1	0	4	0	1
MTA2	0	4	0	0
PKNOX1	0	2	0	0
CDC5L	0	2	0	0
KLF9	0	0	0	2
PTRF	0	1	0	0
COPS2	0	1	0	0
NRF1	0	8	0	4
ZNF584	0	2	0	0
ARNT	0	2	0	0
ZBTB11	0	4	0	2
DNMT3B	0	2	0	0
SMARCE1	0	2	0	0
DIDO1	0	2	0	0
FOXK2	0	6	0	0
ZSCAN29	0	2	0	0
ZNF766	0	2	0	0
HDGF	0	4	0	0
TRIM25	0	2	0	0
DPF2	0	2	0	1
ZBTB40	0	4	0	2
ZNF83	0	2	0	0
MBD1_isoform2	0	2	0	0
MNT	0	2	0	0
PBX2	0	6	0	0
GABP	0	2	0	0
ETV1	0	2	0	0
IKZF1	0	6	0	0
PTTG1	0	2	0	0
NKRF	0	2	0	0
ZNF318	0	3	0	0
LEF1	0	2	0	0
C11orf30	0	2	0	0
DDX20	0	4	0	0
DEAF1	0	1	0	0
GATAD2B	0	0	0	2
MTA3	0	0	0	2
MBD1_isoform1	0	2	0	0
CSDE1	0	2	0	0
PYGO2	0	2	0	0
SUZ12	0	1	0	0
MIER1	0	2	0	0
ADNP	0	2	0	0
TCF7	0	4	0	0
SOX13	0	2	0	0
ZKSCAN8	0	2	0	0
ZKSCAN1	0	2	0	2
NR2F6	0	4	0	0
HLF	0	2	0	0
L3MBTL2	0	2	0	0
GTF2E2	0	1	0	0
KLF1	0	2	0	0
SSRP1	0	2	0	0
ZNF197	0	2	0	0
RUNX1	0	2	0	0
GATA4	0	3	0	0
ZNF512	0	2	0	0
ZNF589	0	2	0	0
KLF13	0	2	0	0
HBP1	0	2	0	0
HINFP	0	2	0	0
NFE2L1	0	1	0	0
TEAD2	0	2	0	0
KDM4B	0	2	0	0
MEF2D	0	2	0	0
HHEX	0	2	0	0
NFRKB	0	2	0	0
ATF4	0	2	0	0
ZNF592	0	0	0	2
E2F5	0	2	0	0
ETV4	0	2	0	0
ZNF644	0	2	0	0
MYNN	0	2	0	0
ZNF740	0	2	0	0
HMBOX1	0	1	0	0
KLF16	0	2	0	0
JUNB	0	3	0	0
YBX1	0	2	0	2
HNF1A	0	2	0	0
BCOR	0	2	0	0
MAFG	0	2	0	0
CBX1	0	4	0	0
HDAC8	0	1	0	0
ZNF639	0	4	0	0
FOXJ2	0	2	0	0
SUPT5H	0	2	0	0
SMARCA5	0	2	0	0
ZNF687	0	0	0	2
CREM	0	2	0	0
TRIM24	0	4	0	0
NONO	0	0	0	1
ZFX	0	2	0	4
IRF9	0	2	0	0
NCOA1	0	2	0	0
NR2F1	0	2	0	0
DNMT1	0	2	0	0
TGIF2	0	2	0	0
ATRX	0	1	0	0
KAT5	0	1	0	0
TOP1	0	0	0	1
NELFE	0	0	0	12
TCF7L1	0	0	0	2
SMC1A	3	4	3	4
NIPBL	0	3	0	4
SMARCC1	0	0	0	1
ORC2	0	1	0	0
ASCL1	0	1	0	0
GRHL2	0	0	0	7
HEY1	0	2	0	0
KMT2D	0	0	0	1
MEN1	0	0	0	2
SPDEF	0	2	0	0
NKX2-1	2	3	0	0
RUNX2	0	0	0	2
KLF10	0	1	0	1
SMAD4	1	3	0	0
TSC22D4	0	1	0	0
ZBTB2	1	1	0	0
ZNF18	0	1	0	0
RUVBL1	0	1	0	0
FOXO3	1	2	0	0
EZH2	0	3	0	0
NFIL3	0	1	0	0
EPC1	0	1	0	0
MBTD1	0	1	0	0
CNOT3	0	0	0	1
ZSCAN2	0	1	0	1
DPF1	0	0	0	1
ZXDC	0	0	0	1
ZNF75A	0	0	0	1
ZNF701	0	0	0	1
WDHD1	0	0	0	2
NFIA	0	1	0	0
L3MBTL4	0	1	0	0
MKL2	0	2	0	0
KDM3B	0	0	0	1
TP53	0	0	0	1
SATB1	0	1	0	0
DNMT3A	0	0	0	1
FAM208A	0	1	0	0
HOXB13	0	6	0	0
FLI1	1	2	0	0
ZNF711	0	0	0	1
EWSR1	0	4	0	0
PHIP	0	0	0	3
AHR	0	0	0	1
T	0	0	0	4
INO80	0	1	0	0
ARID1A	0	0	0	1

## Sheet: Enhancer 4
Transcription_factor	ALDH1A1_high_binding	ALDH1A1_high_total	ALDH1A1_low_binding	ALDH1A1_low_total
POLR2A	0	50	0	130
CEBPA	0	3	0	0
CTCF	0	27	0	61
HNF4A	3	4	2	2
NR2C2	0	5	0	0
RAD21	0	14	0	22
STAG1	0	2	0	6
FOS	0	3	0	1
GATA1	0	14	0	0
JUN	0	6	0	0
MYC	0	13	0	7
NFYA	0	1	0	0
NFYB	0	1	0	0
PRAME	0	1	0	0
ZNF263	0	2	0	0
ESR1	0	1	0	130
FOXA1	0	23	0	34
GATA3	0	1	0	19
TFAP2A	0	0	0	3
TFAP2C	0	0	0	3
AR	24	55	0	0
ERG	0	18	0	0
EP300	2	29	0	17
NR5A2	0	0	0	1
FAIRE	0	3	0	4
H2AZ	0	7	0	15
MECP2	0	0	0	1
FOXM1	0	0	0	7
CTBP1	0	0	0	3
CHD1	0	3	0	1
PTPN11	0	1	0	0
PAF1	0	1	0	8
ZNF143	0	2	0	0
GREB1	0	0	0	3
NR2F2	0	2	0	2
E2F4	0	0	0	1
TLE3	0	0	0	1
KLF4	0	0	0	1
NR3C1	16	32	0	7
CREB1	0	12	0	0
FOXA2	0	2	0	0
ICE1	0	0	0	2
ZC3H8	0	2	0	1
KMT2B	0	0	0	1
BRD4	0	10	0	9
BRD2	0	3	0	0
BRD3	0	3	0	0
KDM1A	0	5	0	0
PHF8	0	2	0	0
HDAC2	0	8	0	1
RBBP5	0	2	0	0
HDAC1	0	5	0	0
MAX	0	7	0	2
CEBPB	0	37	0	2
TCF7L2	0	2	0	3
MAZ	0	2	0	0
TBP	0	2	0	0
SREBF1	0	1	0	2
ESRRA	0	1	0	0
RCOR1	0	3	0	2
MAFF	0	2	0	0
CHD2	0	2	0	0
USF2	0	5	0	0
ARID3A	0	3	0	0
BHLHE40	0	3	0	0
MXI1	0	2	0	0
MAFK	0	3	0	0
SMC3	0	4	0	0
HSF1	0	1	0	0
RFX5	0	2	0	0
JUND	0	3	0	2
ATF1	0	8	0	0
TAL1	0	9	0	0
TBL1XR1	0	2	0	0
GTF2F1	0	1	0	0
HCFC1	0	1	0	2
CCNT2	0	1	0	0
BACH1	0	3	0	0
NFE2	0	2	0	0
STAT1	0	1	0	0
ZMIZ1	0	1	0	0
HMGN3	0	1	0	0
ZNF384	0	1	0	0
IRF1	0	5	0	0
POLR3A	0	1	0	0
CUX1	0	3	0	2
SMARCA4	0	5	0	1
SMARCB1	0	1	0	0
ZNF274	0	1	0	0
ELK1	0	3	0	1
STAT2	0	1	0	0
ZNF217	0	0	0	1
SIX5	0	3	0	0
ATF3	0	4	0	3
SIN3A	0	4	0	5
ELF1	0	7	0	2
SP1	1	4	0	4
USF1	0	3	0	1
TCF12	0	2	0	1
ETS1	0	2	0	0
REST	0	5	0	3
E2F6	0	1	0	0
FOSL2	0	27	0	3
ZBTB33	0	6	0	1
TEAD4	0	3	0	2
TAF1	0	2	0	1
GABPA	0	12	0	1
PBX3	0	1	0	0
YY1	0	1	0	1
CBX3	0	1	0	1
SRF	0	4	0	2
FOSL1	0	3	0	1
EGR1	0	1	0	2
ZBTB7A	0	7	0	0
CEBPD	0	2	0	0
HNF4G	1	3	0	0
NFIC	0	2	0	0
MYBL2	0	1	0	0
ZEB1	0	1	0	0
MBD4	0	1	0	0
STAT5A	0	1	0	0
MEF2A	0	1	0	0
SP2	0	1	0	0
BCLAF1	0	1	0	0
TAF7	0	3	0	0
GATA2	0	3	0	0
CTCFL	0	1	0	2
PML	0	1	0	1
TRIM28	0	1	0	1
THAP1	0	1	0	0
KDM5B	0	0	0	3
SMAD3	0	1	0	0
MBD2	0	2	0	7
SFPQ	0	0	0	1
RARG	0	0	0	2
RARA	0	0	0	1
MED1	0	5	0	5
SCML2	0	1	0	0
FOXP1	0	1	0	0
PIAS1	0	5	0	0
ASH2L	0	2	0	0
SUMO2	0	24	0	0
RELA	1	4	0	4
PR	0	0	0	6
LMTK3	0	0	0	1
NCAPG	0	0	0	3
NCAPG2	0	0	0	1
TCF4	0	0	0	1
SPI1	0	6	0	0
APOBEC3B	0	0	0	1
CDK8	0	1	0	0
KRAB	0	1	0	0
LARP7	0	2	0	1
HEXIM1	0	0	0	1
ZEB2	0	4	0	0
ID3	0	1	0	0
ZNF175	0	2	0	0
BCL3	0	29	0	0
TFDP1	0	2	0	0
PLRG1	0	2	0	0
TARDBP	0	2	0	0
RFX1	0	2	0	4
CHAMP1	0	2	0	0
RNF2	0	6	0	0
HES2	0	13	0	0
RAD51	0	4	0	0
NBN	0	2	0	2
KAT8	0	1	0	0
HLTF	0	2	0	0
HES1	0	1	0	0
CREB3	0	2	0	0
CEBPG	0	2	0	2
ZNF207	0	1	0	1
ZNF24	0	6	0	0
ZMYM3	0	9	0	1
TFAP4	0	2	0	0
MLLT1	0	4	0	1
MTA2	0	4	0	0
PKNOX1	0	2	0	0
CDC5L	0	2	0	0
KLF9	0	0	0	2
PTRF	0	1	0	0
COPS2	0	1	0	0
NRF1	0	8	0	4
ZNF584	0	2	0	0
ARNT	0	2	0	0
ZBTB11	0	4	0	2
DNMT3B	0	2	0	0
SMARCE1	0	2	0	0
DIDO1	0	2	0	0
FOXK2	0	6	0	0
ZSCAN29	0	2	0	0
ZNF766	0	2	0	0
HDGF	0	4	0	0
TRIM25	0	2	0	0
DPF2	0	2	0	1
ZBTB40	0	4	0	2
ZNF83	0	2	0	0
MBD1_isoform2	0	2	0	0
MNT	0	2	0	0
PBX2	0	6	0	0
GABP	0	2	0	0
ETV1	0	2	0	0
IKZF1	0	6	0	0
PTTG1	0	2	0	0
NKRF	0	2	0	0
ZNF318	0	3	0	0
LEF1	0	2	0	0
C11orf30	0	2	0	0
DDX20	0	4	0	0
DEAF1	0	1	0	0
GATAD2B	0	0	0	2
MTA3	0	0	0	2
MBD1_isoform1	0	2	0	0
CSDE1	0	2	0	0
PYGO2	0	2	0	0
SUZ12	0	1	0	0
MIER1	0	2	0	0
ADNP	0	2	0	0
TCF7	0	4	0	0
SOX13	0	2	0	0
ZKSCAN8	0	2	0	0
ZKSCAN1	0	2	0	2
NR2F6	0	4	0	0
HLF	0	2	0	0
L3MBTL2	0	2	0	0
GTF2E2	0	1	0	0
KLF1	0	2	0	0
SSRP1	0	2	0	0
ZNF197	0	2	0	0
RUNX1	0	2	0	0
GATA4	0	3	0	0
ZNF512	0	2	0	0
ZNF589	0	2	0	0
KLF13	0	2	0	0
HBP1	0	2	0	0
HINFP	0	2	0	0
NFE2L1	0	1	0	0
TEAD2	0	2	0	0
KDM4B	0	2	0	0
MEF2D	0	2	0	0
HHEX	0	2	0	0
NFRKB	0	2	0	0
ATF4	0	2	0	0
ZNF592	0	0	0	2
E2F5	0	2	0	0
ETV4	0	2	0	0
ZNF644	0	2	0	0
MYNN	0	2	0	0
ZNF740	0	2	0	0
HMBOX1	0	1	0	0
KLF16	0	2	0	0
JUNB	0	3	0	0
YBX1	0	2	0	2
HNF1A	0	2	0	0
BCOR	0	2	0	0
MAFG	0	2	0	0
CBX1	0	4	0	0
HDAC8	0	1	0	0
ZNF639	0	4	0	0
FOXJ2	0	2	0	0
SUPT5H	0	2	0	0
SMARCA5	0	2	0	0
ZNF687	0	0	0	2
CREM	0	2	0	0
TRIM24	0	4	0	0
NONO	0	0	0	1
ZFX	0	2	0	4
IRF9	0	2	0	0
NCOA1	0	2	0	0
NR2F1	2	2	0	0
DNMT1	0	2	0	0
TGIF2	0	2	0	0
ATRX	0	1	0	0
KAT5	0	1	0	0
TOP1	0	0	0	1
NELFE	0	0	0	12
TCF7L1	0	0	0	2
SMC1A	0	4	0	4
NIPBL	0	3	0	4
SMARCC1	0	0	0	1
ORC2	0	1	0	0
ASCL1	0	1	0	0
GRHL2	0	0	1	7
HEY1	0	2	0	0
KMT2D	0	0	0	1
MEN1	0	0	0	2
SPDEF	0	2	0	0
NKX2-1	0	3	0	0
RUNX2	0	0	0	2
KLF10	0	1	0	1
SMAD4	0	3	0	0
TSC22D4	0	1	0	0
ZBTB2	0	1	0	0
ZNF18	0	1	0	0
RUVBL1	0	1	0	0
FOXO3	0	2	0	0
EZH2	0	3	0	0
NFIL3	0	1	0	0
EPC1	0	1	0	0
MBTD1	0	1	0	0
CNOT3	0	0	0	1
ZSCAN2	0	1	0	1
DPF1	0	0	0	1
ZXDC	0	0	0	1
ZNF75A	0	0	0	1
ZNF701	0	0	0	1
WDHD1	0	0	0	2
NFIA	0	1	0	0
L3MBTL4	0	1	0	0
MKL2	0	2	0	0
KDM3B	0	0	0	1
TP53	0	0	0	1
SATB1	0	1	0	0
DNMT3A	0	0	0	1
FAM208A	0	1	0	0
HOXB13	0	6	0	0
FLI1	0	2	0	0
ZNF711	0	0	0	1
EWSR1	0	4	0	0
PHIP	0	0	0	3
AHR	0	0	0	1
T	0	0	0	4
INO80	0	1	0	0
ARID1A	0	0	0	1

## Sheet: Enhancer 5
Transcription_factor	ALDH1A1_high_binding	ALDH1A1_high_total	ALDH1A1_low_binding	ALDH1A1_low_total
POLR2A	0	50	0	130
CEBPA	0	3	0	0
CTCF	2	27	1	61
HNF4A	1	4	0	2
NR2C2	0	5	0	0
RAD21	2	14	0	22
STAG1	0	2	0	6
FOS	0	3	0	1
GATA1	0	14	0	0
JUN	1	6	0	0
MYC	0	13	0	7
NFYA	0	1	0	0
NFYB	0	1	0	0
PRAME	0	1	0	0
ZNF263	0	2	0	0
ESR1	0	1	0	130
FOXA1	3	23	0	34
GATA3	1	1	0	19
TFAP2A	0	0	0	3
TFAP2C	0	0	0	3
AR	0	55	0	0
ERG	0	18	0	0
EP300	11	29	0	17
NR5A2	0	0	0	1
FAIRE	0	3	0	4
H2AZ	0	7	0	15
MECP2	0	0	0	1
FOXM1	0	0	0	7
CTBP1	0	0	0	3
CHD1	0	3	0	1
PTPN11	0	1	0	0
PAF1	0	1	0	8
ZNF143	0	2	0	0
GREB1	0	0	0	3
NR2F2	0	2	0	2
E2F4	0	0	0	1
TLE3	0	0	0	1
KLF4	0	0	0	1
NR3C1	10	32	0	7
CREB1	3	12	0	0
FOXA2	2	2	0	0
ICE1	0	0	0	2
ZC3H8	0	2	0	1
KMT2B	0	0	0	1
BRD4	0	10	0	9
BRD2	0	3	0	0
BRD3	0	3	0	0
KDM1A	0	5	0	0
PHF8	0	2	0	0
HDAC2	0	8	0	1
RBBP5	0	2	0	0
HDAC1	0	5	0	0
MAX	0	7	0	2
CEBPB	8	37	1	2
TCF7L2	0	2	0	3
MAZ	0	2	0	0
TBP	0	2	0	0
SREBF1	0	1	0	2
ESRRA	0	1	0	0
RCOR1	0	3	0	2
MAFF	0	2	0	0
CHD2	0	2	0	0
USF2	0	5	0	0
ARID3A	0	3	0	0
BHLHE40	0	3	0	0
MXI1	0	2	0	0
MAFK	0	3	0	0
SMC3	0	4	0	0
HSF1	0	1	0	0
RFX5	0	2	0	0
JUND	0	3	0	2
ATF1	1	8	0	0
TAL1	0	9	0	0
TBL1XR1	0	2	0	0
GTF2F1	0	1	0	0
HCFC1	0	1	0	2
CCNT2	0	1	0	0
BACH1	0	3	0	0
NFE2	0	2	0	0
STAT1	0	1	0	0
ZMIZ1	0	1	0	0
HMGN3	0	1	0	0
ZNF384	1	1	0	0
IRF1	0	5	0	0
POLR3A	0	1	0	0
CUX1	0	3	0	2
SMARCA4	0	5	0	1
SMARCB1	0	1	0	0
ZNF274	0	1	0	0
ELK1	0	3	0	1
STAT2	0	1	0	0
ZNF217	0	0	0	1
SIX5	0	3	0	0
ATF3	0	4	0	3
SIN3A	0	4	0	5
ELF1	0	7	0	2
SP1	0	4	0	4
USF1	0	3	0	1
TCF12	1	2	0	1
ETS1	0	2	0	0
REST	0	5	0	3
E2F6	0	1	0	0
FOSL2	0	27	0	3
ZBTB33	0	6	0	1
TEAD4	0	3	0	2
TAF1	0	2	0	1
GABPA	0	12	0	1
PBX3	0	1	0	0
YY1	0	1	0	1
CBX3	0	1	0	1
SRF	0	4	0	2
FOSL1	0	3	0	1
EGR1	0	1	0	2
ZBTB7A	0	7	0	0
CEBPD	0	2	0	0
HNF4G	0	3	0	0
NFIC	0	2	0	0
MYBL2	0	1	0	0
ZEB1	0	1	0	0
MBD4	0	1	0	0
STAT5A	0	1	0	0
MEF2A	0	1	0	0
SP2	0	1	0	0
BCLAF1	0	1	0	0
TAF7	0	3	0	0
GATA2	0	3	0	0
CTCFL	0	1	0	2
PML	0	1	0	1
TRIM28	0	1	0	1
THAP1	0	1	0	0
KDM5B	0	0	0	3
SMAD3	0	1	0	0
MBD2	0	2	0	7
SFPQ	0	0	0	1
RARG	0	0	0	2
RARA	0	0	0	1
MED1	0	5	0	5
SCML2	0	1	0	0
FOXP1	0	1	0	0
PIAS1	0	5	0	0
ASH2L	0	2	0	0
SUMO2	0	24	0	0
RELA	2	4	0	4
PR	0	0	0	6
LMTK3	0	0	0	1
NCAPG	0	0	0	3
NCAPG2	0	0	0	1
TCF4	0	0	0	1
SPI1	0	6	0	0
APOBEC3B	0	0	0	1
CDK8	0	1	0	0
KRAB	0	1	0	0
LARP7	0	2	0	1
HEXIM1	0	0	0	1
ZEB2	0	4	0	0
ID3	0	1	0	0
ZNF175	0	2	0	0
BCL3	2	29	0	0
TFDP1	0	2	0	0
PLRG1	0	2	0	0
TARDBP	0	2	0	0
RFX1	0	2	0	4
CHAMP1	0	2	0	0
RNF2	0	6	0	0
HES2	2	13	0	0
RAD51	0	4	0	0
NBN	0	2	0	2
KAT8	0	1	0	0
HLTF	0	2	0	0
HES1	0	1	0	0
CREB3	0	2	0	0
CEBPG	0	2	0	2
ZNF207	0	1	0	1
ZNF24	0	6	0	0
ZMYM3	0	9	0	1
TFAP4	1	2	0	0
MLLT1	0	4	0	1
MTA2	0	4	0	0
PKNOX1	0	2	0	0
CDC5L	0	2	0	0
KLF9	0	0	0	2
PTRF	0	1	0	0
COPS2	0	1	0	0
NRF1	0	8	0	4
ZNF584	0	2	0	0
ARNT	0	2	0	0
ZBTB11	0	4	0	2
DNMT3B	0	2	0	0
SMARCE1	0	2	0	0
DIDO1	0	2	0	0
FOXK2	0	6	0	0
ZSCAN29	0	2	0	0
ZNF766	0	2	0	0
HDGF	0	4	0	0
TRIM25	0	2	0	0
DPF2	0	2	0	1
ZBTB40	4	4	0	2
ZNF83	0	2	0	0
MBD1_isoform2	0	2	0	0
MNT	0	2	0	0
PBX2	0	6	0	0
GABP	0	2	0	0
ETV1	0	2	0	0
IKZF1	2	6	0	0
PTTG1	0	2	0	0
NKRF	0	2	0	0
ZNF318	0	3	0	0
LEF1	0	2	0	0
C11orf30	0	2	0	0
DDX20	0	4	0	0
DEAF1	0	1	0	0
GATAD2B	0	0	0	2
MTA3	0	0	0	2
MBD1_isoform1	0	2	0	0
CSDE1	0	2	0	0
PYGO2	0	2	0	0
SUZ12	0	1	0	0
MIER1	0	2	0	0
ADNP	0	2	0	0
TCF7	0	4	0	0
SOX13	0	2	0	0
ZKSCAN8	0	2	0	0
ZKSCAN1	0	2	0	2
NR2F6	0	4	0	0
HLF	2	2	0	0
L3MBTL2	0	2	0	0
GTF2E2	0	1	0	0
KLF1	0	2	0	0
SSRP1	0	2	0	0
ZNF197	0	2	0	0
RUNX1	0	2	0	0
GATA4	0	3	0	0
ZNF512	0	2	0	0
ZNF589	0	2	0	0
KLF13	0	2	0	0
HBP1	0	2	0	0
HINFP	0	2	0	0
NFE2L1	0	1	0	0
TEAD2	0	2	0	0
KDM4B	0	2	0	0
MEF2D	0	2	0	0
HHEX	0	2	0	0
NFRKB	0	2	0	0
ATF4	1	2	0	0
ZNF592	0	0	0	2
E2F5	0	2	0	0
ETV4	0	2	0	0
ZNF644	0	2	0	0
MYNN	0	2	0	0
ZNF740	0	2	0	0
HMBOX1	0	1	0	0
KLF16	0	2	0	0
JUNB	0	3	0	0
YBX1	0	2	0	2
HNF1A	0	2	0	0
BCOR	0	2	0	0
MAFG	0	2	0	0
CBX1	0	4	0	0
HDAC8	0	1	0	0
ZNF639	0	4	0	0
FOXJ2	0	2	0	0
SUPT5H	0	2	0	0
SMARCA5	0	2	0	0
ZNF687	0	0	0	2
CREM	0	2	0	0
TRIM24	0	4	0	0
NONO	0	0	0	1
ZFX	0	2	0	4
IRF9	0	2	0	0
NCOA1	0	2	0	0
NR2F1	0	2	0	0
DNMT1	0	2	0	0
TGIF2	0	2	0	0
ATRX	0	1	0	0
KAT5	0	1	0	0
TOP1	0	0	0	1
NELFE	0	0	0	12
TCF7L1	0	0	0	2
SMC1A	0	4	0	4
NIPBL	0	3	0	4
SMARCC1	0	0	0	1
ORC2	0	1	0	0
ASCL1	0	1	0	0
GRHL2	0	0	0	7
HEY1	0	2	0	0
KMT2D	0	0	0	1
MEN1	0	0	0	2
SPDEF	0	2	0	0
NKX2-1	1	3	0	0
RUNX2	0	0	0	2
KLF10	0	1	0	1
SMAD4	0	3	0	0
TSC22D4	0	1	0	0
ZBTB2	0	1	0	0
ZNF18	0	1	0	0
RUVBL1	0	1	0	0
FOXO3	0	2	0	0
EZH2	0	3	0	0
NFIL3	1	1	0	0
EPC1	0	1	0	0
MBTD1	0	1	0	0
CNOT3	0	0	0	1
ZSCAN2	0	1	0	1
DPF1	0	0	0	1
ZXDC	0	0	0	1
ZNF75A	0	0	0	1
ZNF701	0	0	0	1
WDHD1	0	0	0	2
NFIA	0	1	0	0
L3MBTL4	0	1	0	0
MKL2	0	2	0	0
KDM3B	0	0	0	1
TP53	0	0	0	1
SATB1	0	1	0	0
DNMT3A	0	0	0	1
FAM208A	0	1	0	0
HOXB13	0	6	0	0
FLI1	0	2	0	0
ZNF711	0	0	0	1
EWSR1	0	4	0	0
PHIP	0	0	0	3
AHR	0	0	0	1
T	0	0	0	4
INO80	0	1	0	0
ARID1A	0	0	0	1
