# Supplementary material for: Single-PanIN-seq unveils that ARID1A deficiency promotes pancreatic tumorigenesis by attenuating KRAS-induced senescence
Source: eLife. 2021 May 13;10:e64204. doi: 10.7554/eLife.64204 (PMC8203294; doi:10.7554/eLife.64204)
Supplement: Supplementary file 10. [file elife-64204-supp10.xlsx]

## Sheet: Sheet1
File accession	File format	File type	Output type	File assembly	Biosample term name	Biosample type	Biosample organism	Experiment target	Project	File download URL
ENCFF832PZL	bam	bam	alignments	hg19	VCaP	cell line	Homo sapiens	H3K27ac-human	ENCODE	https://www.encodeproject.org/files/ENCFF832PZL/@@download/ENCFF832PZL.bam
ENCFF387ZJZ	bam	bam	alignments	hg19	VCaP	cell line	Homo sapiens	H3K27ac-human	ENCODE	https://www.encodeproject.org/files/ENCFF387ZJZ/@@download/ENCFF387ZJZ.bam
ENCFF114XOB	bam	bam	alignments	hg19	22Rv1	cell line	Homo sapiens	H3K27ac-human	ENCODE	https://www.encodeproject.org/files/ENCFF114XOB/@@download/ENCFF114XOB.bam
ENCFF607ITE	bam	bam	alignments	hg19	22Rv1	cell line	Homo sapiens	H3K27ac-human	ENCODE	https://www.encodeproject.org/files/ENCFF607ITE/@@download/ENCFF607ITE.bam
ENCFF402HOD	bam	bam	alignments	hg19	Loucy	cell line	Homo sapiens	H3K4me1-human	ENCODE	https://www.encodeproject.org/files/ENCFF402HOD/@@download/ENCFF402HOD.bam
ENCFF550ROC	bam	bam	alignments	hg19	Loucy	cell line	Homo sapiens	H3K4me1-human	ENCODE	https://www.encodeproject.org/files/ENCFF550ROC/@@download/ENCFF550ROC.bam
ENCFF000BWX	bam	bam	alignments	hg19	K562	cell line	Homo sapiens	H3K27ac-human	ENCODE	https://www.encodeproject.org/files/ENCFF000BWX/@@download/ENCFF000BWX.bam
ENCFF000BWZ	bam	bam	alignments	hg19	K562	cell line	Homo sapiens	H3K27ac-human	ENCODE	https://www.encodeproject.org/files/ENCFF000BWZ/@@download/ENCFF000BWZ.bam
ENCFF070PWH	bam	bam	alignments	hg19	K562	cell line	Homo sapiens	H3K27ac-human	ENCODE	https://www.encodeproject.org/files/ENCFF070PWH/@@download/ENCFF070PWH.bam
ENCFF384ZZM	bam	bam	alignments	hg19	K562	cell line	Homo sapiens	H3K27ac-human	ENCODE	https://www.encodeproject.org/files/ENCFF384ZZM/@@download/ENCFF384ZZM.bam
ENCFF040NGJ	bam	bam	alignments	hg19	A673	cell line	Homo sapiens	H3K27ac-human	ENCODE	https://www.encodeproject.org/files/ENCFF040NGJ/@@download/ENCFF040NGJ.bam
ENCFF416TYB	bam	bam	alignments	hg19	A673	cell line	Homo sapiens	H3K27ac-human	ENCODE	https://www.encodeproject.org/files/ENCFF416TYB/@@download/ENCFF416TYB.bam
ENCFF000BEM	bam	bam	alignments	hg19	HepG2	cell line	Homo sapiens	H3K4me1-human	ENCODE	https://www.encodeproject.org/files/ENCFF000BEM/@@download/ENCFF000BEM.bam
ENCFF000BEO	bam	bam	alignments	hg19	HepG2	cell line	Homo sapiens	H3K4me1-human	ENCODE	https://www.encodeproject.org/files/ENCFF000BEO/@@download/ENCFF000BEO.bam
ENCFF401IDX	bam	bam	alignments	hg19	HepG2	cell line	Homo sapiens	H3K4me1-human	ENCODE	https://www.encodeproject.org/files/ENCFF401IDX/@@download/ENCFF401IDX.bam
ENCFF995WXM	bam	bam	alignments	hg19	HepG2	cell line	Homo sapiens	H3K4me1-human	ENCODE	https://www.encodeproject.org/files/ENCFF995WXM/@@download/ENCFF995WXM.bam
ENCFF000BEZ	bam	bam	alignments	hg19	HepG2	cell line	Homo sapiens	H3K27ac-human	ENCODE	https://www.encodeproject.org/files/ENCFF000BEZ/@@download/ENCFF000BEZ.bam
ENCFF000BFB	bam	bam	alignments	hg19	HepG2	cell line	Homo sapiens	H3K27ac-human	ENCODE	https://www.encodeproject.org/files/ENCFF000BFB/@@download/ENCFF000BFB.bam
ENCFF638JUP	bam	bam	alignments	hg19	HepG2	cell line	Homo sapiens	H3K27ac-human	ENCODE	https://www.encodeproject.org/files/ENCFF638JUP/@@download/ENCFF638JUP.bam
ENCFF208LPX	bam	bam	alignments	hg19	HepG2	cell line	Homo sapiens	H3K27ac-human	ENCODE	https://www.encodeproject.org/files/ENCFF208LPX/@@download/ENCFF208LPX.bam
ENCFF000VDH	bam	bam	alignments	hg19	K562	cell line	Homo sapiens	H3K4me1-human	ENCODE	https://www.encodeproject.org/files/ENCFF000VDH/@@download/ENCFF000VDH.bam
ENCFF000VDJ	bam	bam	alignments	hg19	K562	cell line	Homo sapiens	H3K4me1-human	ENCODE	https://www.encodeproject.org/files/ENCFF000VDJ/@@download/ENCFF000VDJ.bam
ENCFF825PKH	bam	bam	alignments	hg19	K562	cell line	Homo sapiens	H3K4me1-human	ENCODE	https://www.encodeproject.org/files/ENCFF825PKH/@@download/ENCFF825PKH.bam
ENCFF196QGZ	bam	bam	alignments	hg19	K562	cell line	Homo sapiens	H3K4me1-human	ENCODE	https://www.encodeproject.org/files/ENCFF196QGZ/@@download/ENCFF196QGZ.bam
ENCFF000BXK	bam	bam	alignments	hg19	K562	cell line	Homo sapiens	H3K4me1-human	ENCODE	https://www.encodeproject.org/files/ENCFF000BXK/@@download/ENCFF000BXK.bam
ENCFF000BXL	bam	bam	alignments	hg19	K562	cell line	Homo sapiens	H3K4me1-human	ENCODE	https://www.encodeproject.org/files/ENCFF000BXL/@@download/ENCFF000BXL.bam
ENCFF798WDB	bam	bam	alignments	hg19	K562	cell line	Homo sapiens	H3K4me1-human	ENCODE	https://www.encodeproject.org/files/ENCFF798WDB/@@download/ENCFF798WDB.bam
ENCFF213ZYR	bam	bam	alignments	hg19	K562	cell line	Homo sapiens	H3K4me1-human	ENCODE	https://www.encodeproject.org/files/ENCFF213ZYR/@@download/ENCFF213ZYR.bam
ENCFF570RYM	bam	bam	alignments	hg19	A673	cell line	Homo sapiens	H3K4me1-human	ENCODE	https://www.encodeproject.org/files/ENCFF570RYM/@@download/ENCFF570RYM.bam
ENCFF076SQM	bam	bam	alignments	hg19	A673	cell line	Homo sapiens	H3K4me1-human	ENCODE	https://www.encodeproject.org/files/ENCFF076SQM/@@download/ENCFF076SQM.bam
ENCFF141ICG	fastq	fastq	reads		A549	cell line	Homo sapiens	H3K27ac-human	GGR	https://www.encodeproject.org/files/ENCFF141ICG/@@download/ENCFF141ICG.fastq.gz
ENCFF648QLO	fastq	fastq	reads		A549	cell line	Homo sapiens	H3K27ac-human	GGR	https://www.encodeproject.org/files/ENCFF648QLO/@@download/ENCFF648QLO.fastq.gz
ENCFF561LMW	fastq	fastq	reads		A549	cell line	Homo sapiens	H3K27ac-human	GGR	https://www.encodeproject.org/files/ENCFF561LMW/@@download/ENCFF561LMW.fastq.gz
ENCFF654DWA	fastq	fastq	reads		A549	cell line	Homo sapiens	H3K4me1-human	GGR	https://www.encodeproject.org/files/ENCFF654DWA/@@download/ENCFF654DWA.fastq.gz
ENCFF660AKA	fastq	fastq	reads		A549	cell line	Homo sapiens	H3K4me1-human	GGR	https://www.encodeproject.org/files/ENCFF660AKA/@@download/ENCFF660AKA.fastq.gz
ENCFF789SAF	fastq	fastq	reads		A549	cell line	Homo sapiens	H3K4me1-human	GGR	https://www.encodeproject.org/files/ENCFF789SAF/@@download/ENCFF789SAF.fastq.gz
ENCFF187VER	fastq	fastq	reads		A549	cell line	Homo sapiens	H3K27ac-human	GGR	https://www.encodeproject.org/files/ENCFF187VER/@@download/ENCFF187VER.fastq.gz
ENCFF573OYR	fastq	fastq	reads		A549	cell line	Homo sapiens	H3K27ac-human	GGR	https://www.encodeproject.org/files/ENCFF573OYR/@@download/ENCFF573OYR.fastq.gz
ENCFF823YGI	fastq	fastq	reads		A549	cell line	Homo sapiens	H3K27ac-human	GGR	https://www.encodeproject.org/files/ENCFF823YGI/@@download/ENCFF823YGI.fastq.gz
