# Supplementary figures and images for: Single-PanIN-seq unveils that ARID1A deficiency promotes pancreatic tumorigenesis by attenuating KRAS-induced senescence
Source: eLife journal article supplement (doi:10.7554/elife.64204), 2021-05-13

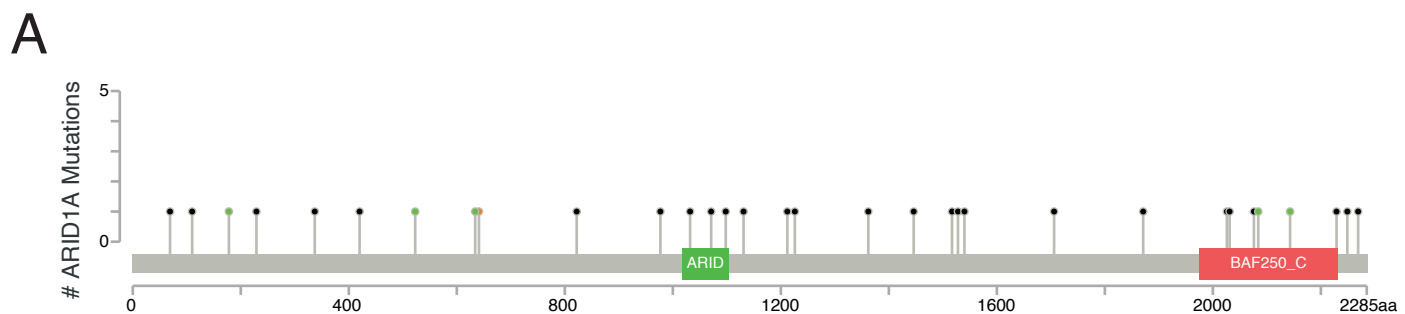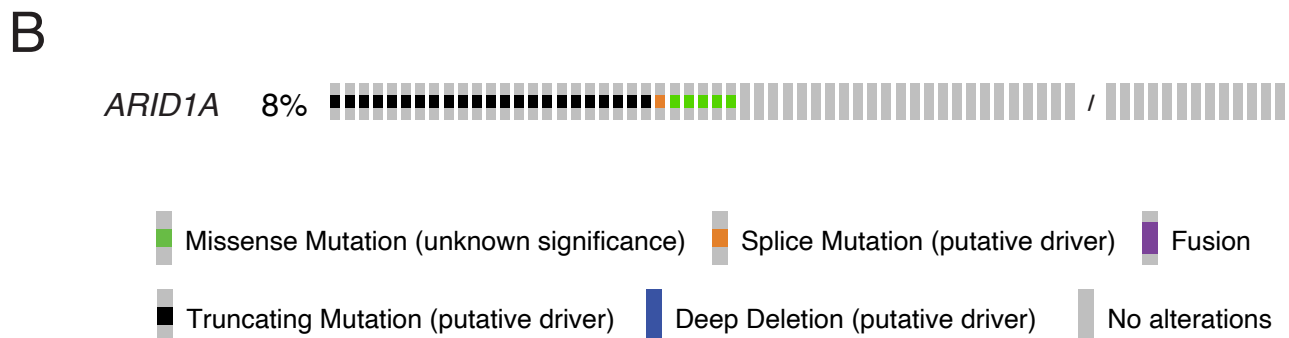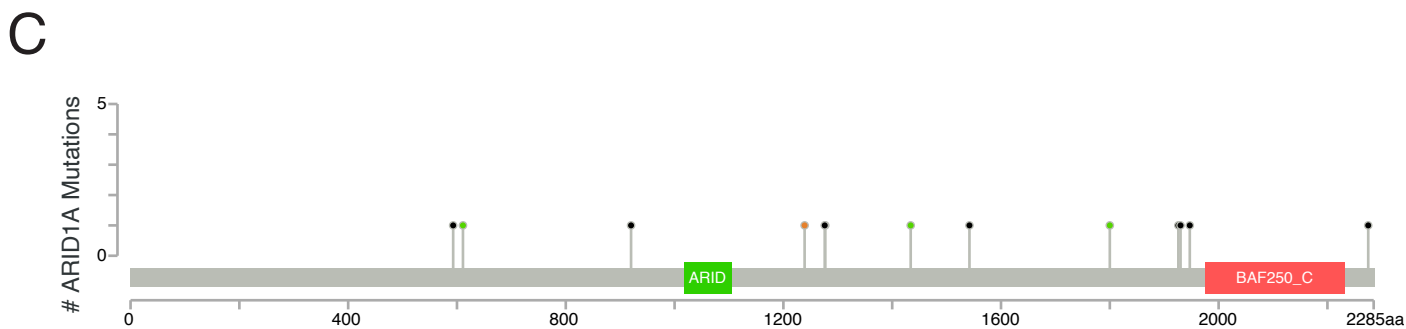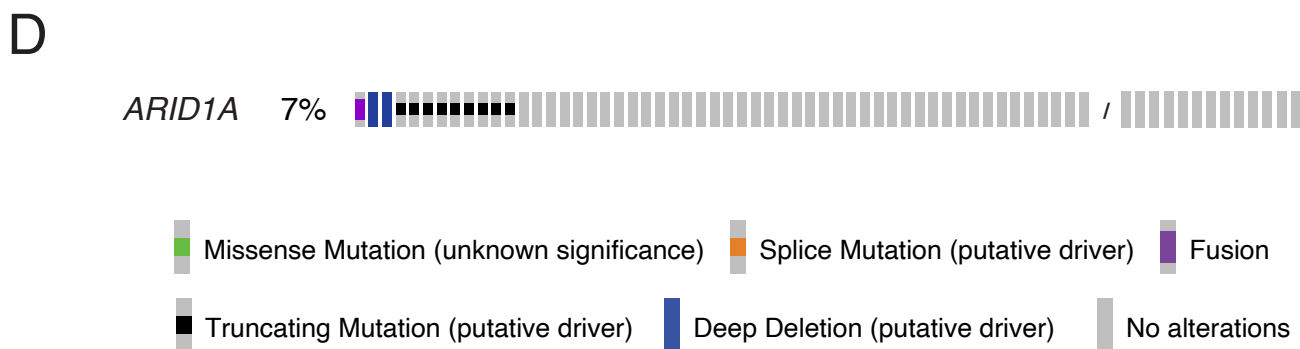

Figure 1- figure supplement 1

Supplement: supp [file elife_poa_e64204_Figure_1_figure_supplement_1.pdf › elife_poa_e64204_Figure_1_figure_supplement_1.pdf]

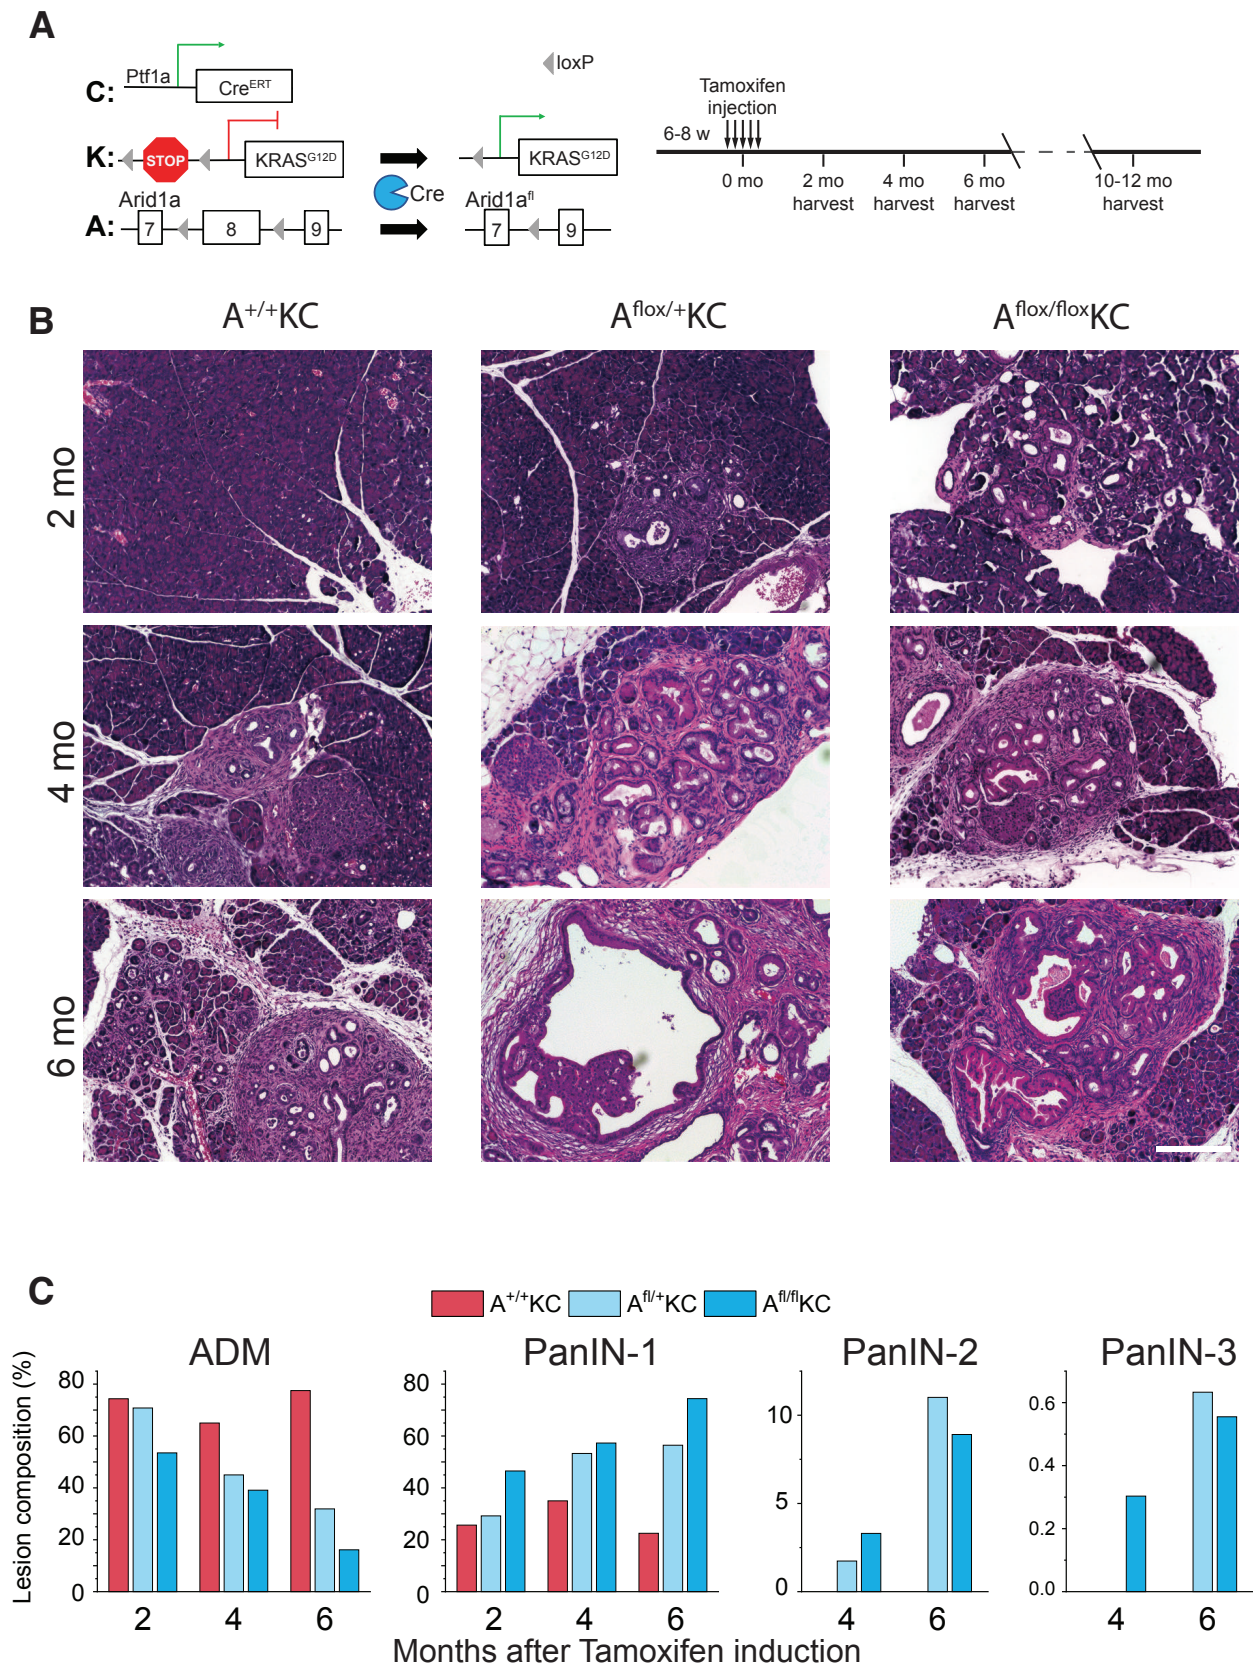

Figure 1-figure supplement 2

Supplement: supp [file elife_poa_e64204_Figure_1_figure_supplement_2.pdf › elife_poa_e64204_Figure_1_figure_supplement_2.pdf]

A

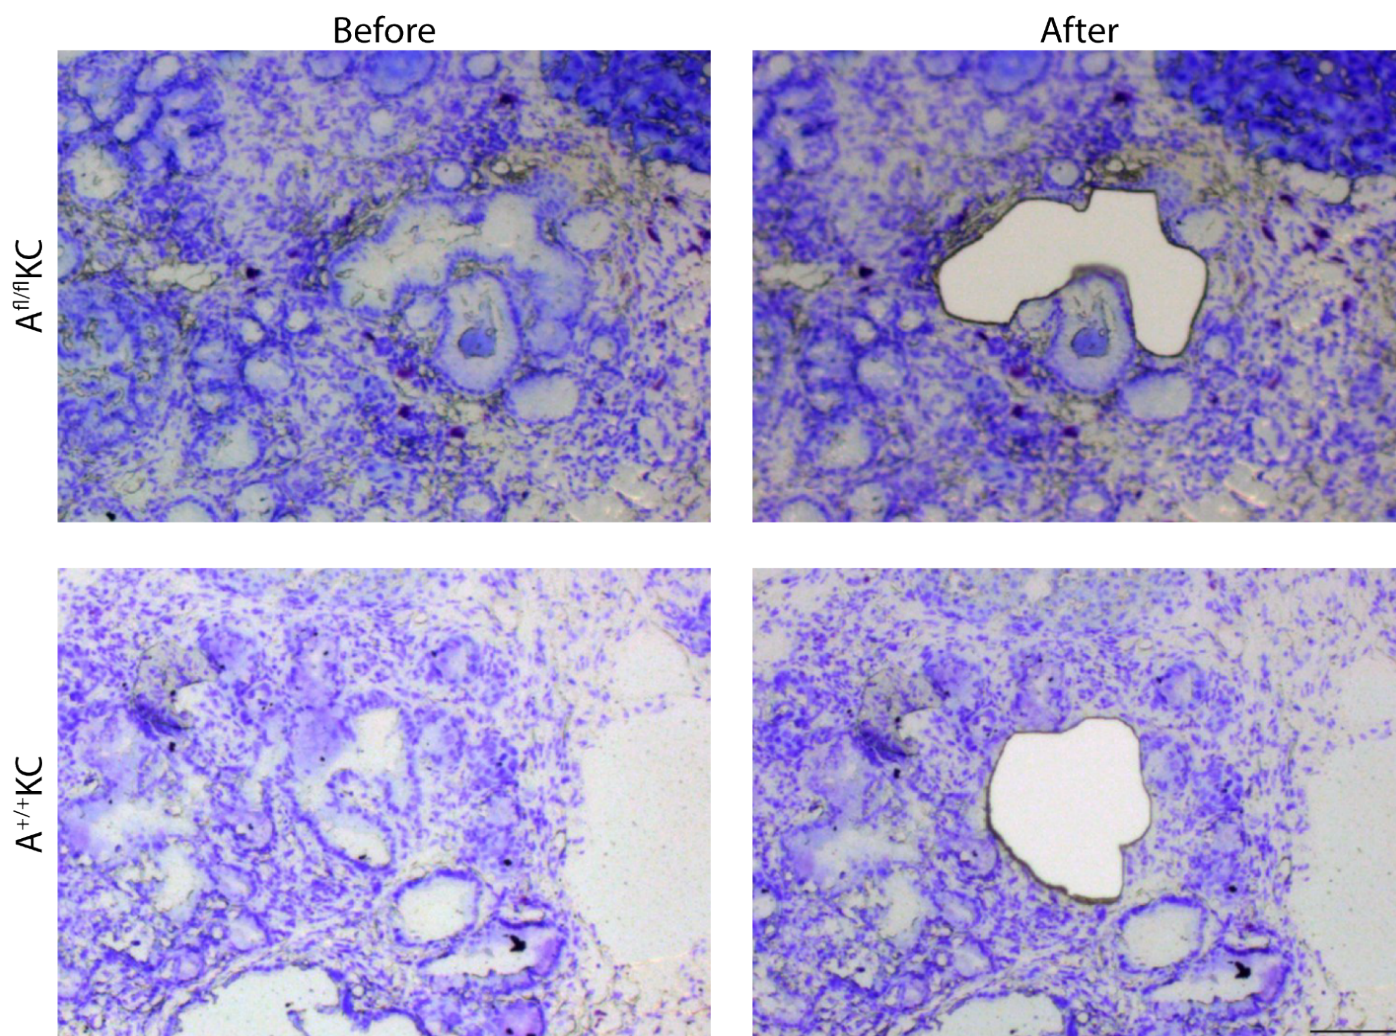

B

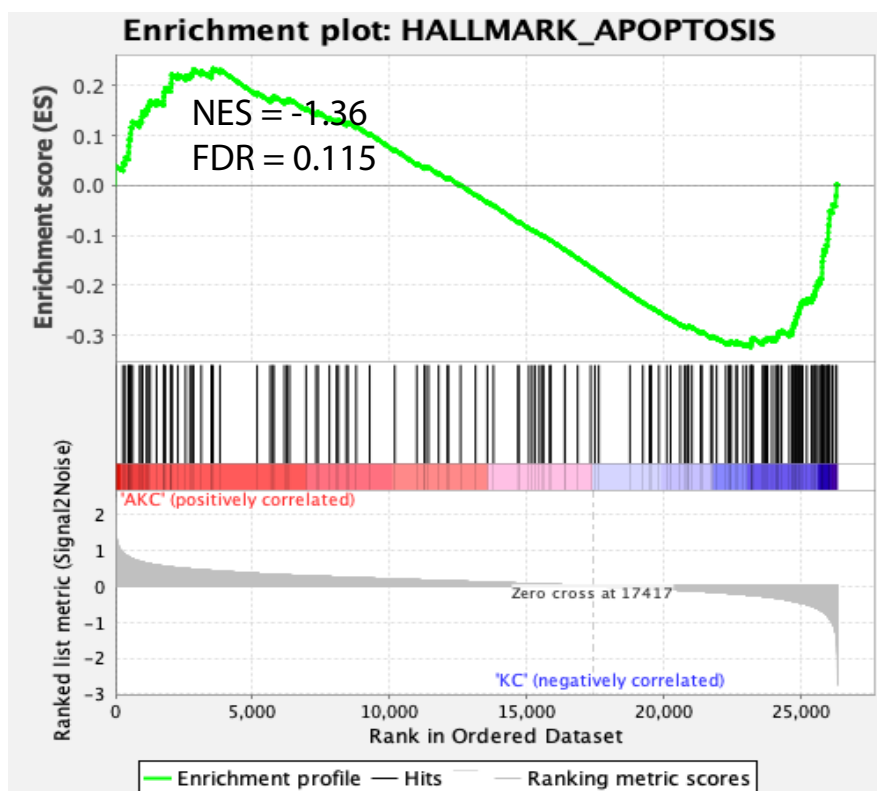

Figure 1-figure supplement 3

Supplement: supp [file elife_poa_e64204_Figure_1_figure_supplement_3.pdf › elife_poa_e64204_Figure_1_figure_supplement_3.pdf]

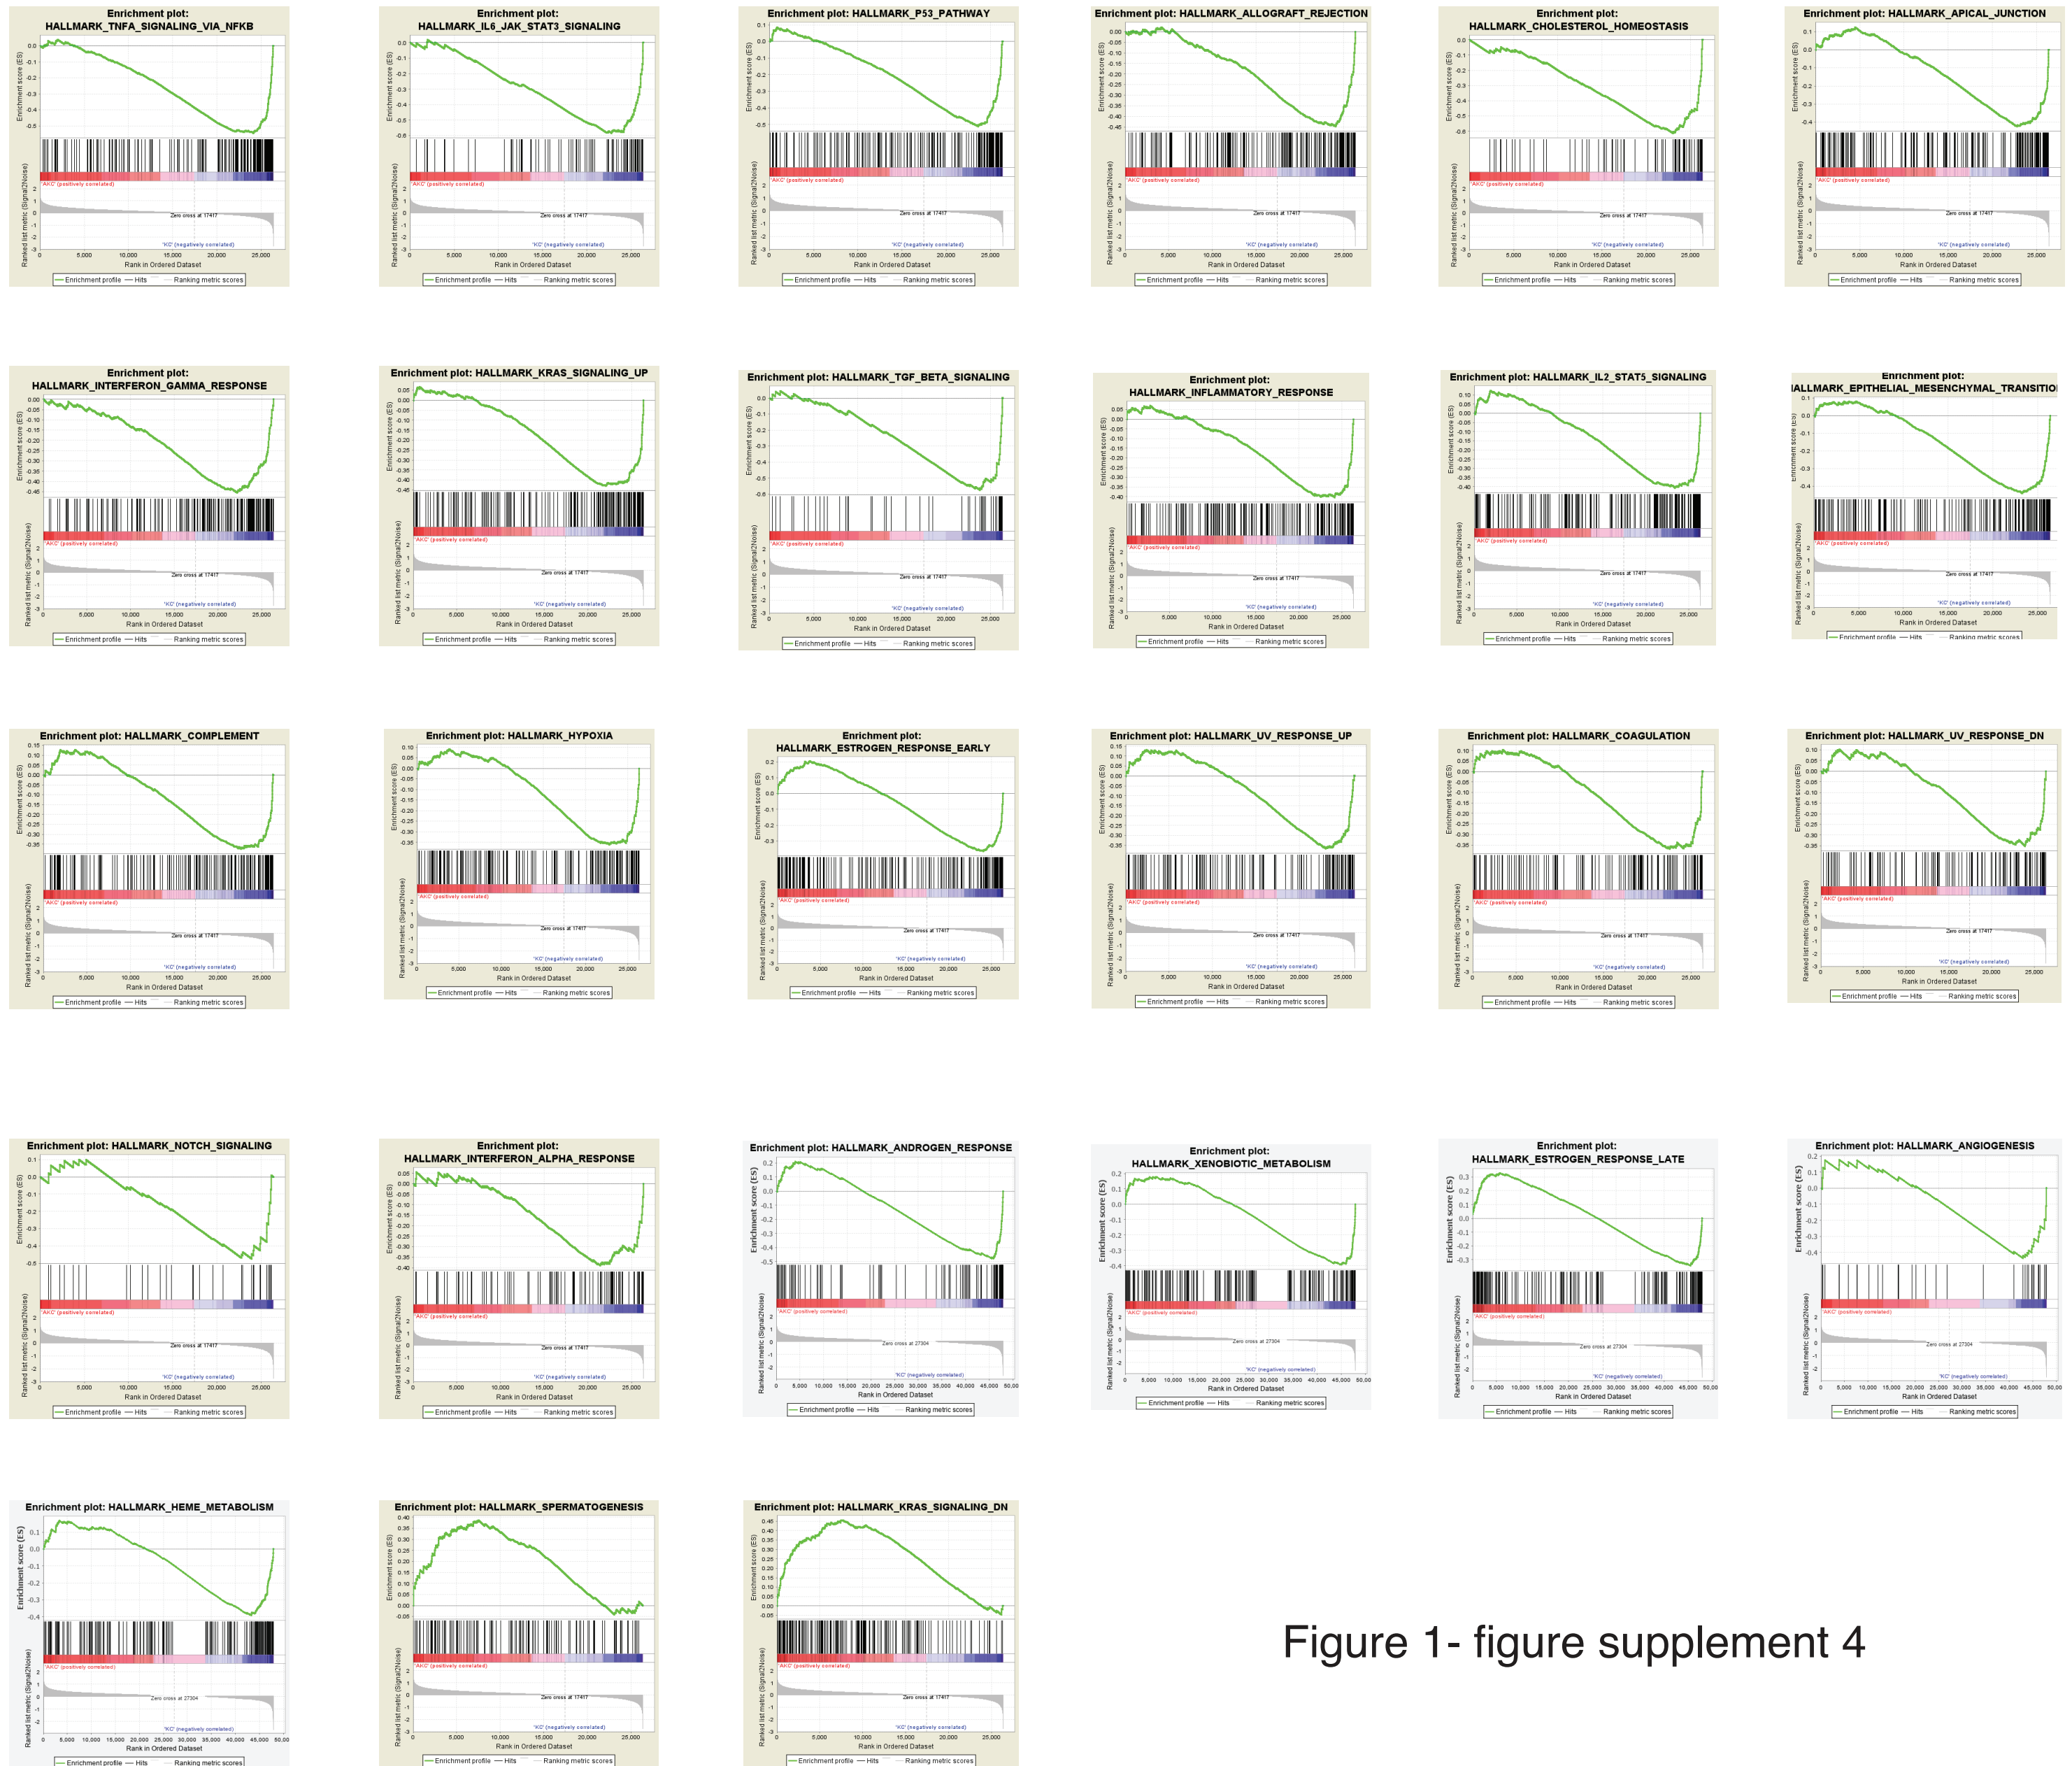

Figure 1- figure supplement 4

Supplement: supp [file elife_poa_e64204_Figure_1_figure_supplement_4.pdf › elife_poa_e64204_Figure_1_figure_supplement_4.pdf]

**A**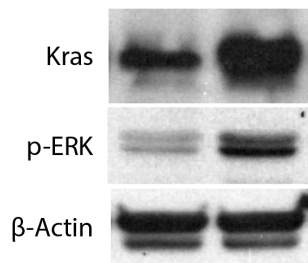**B**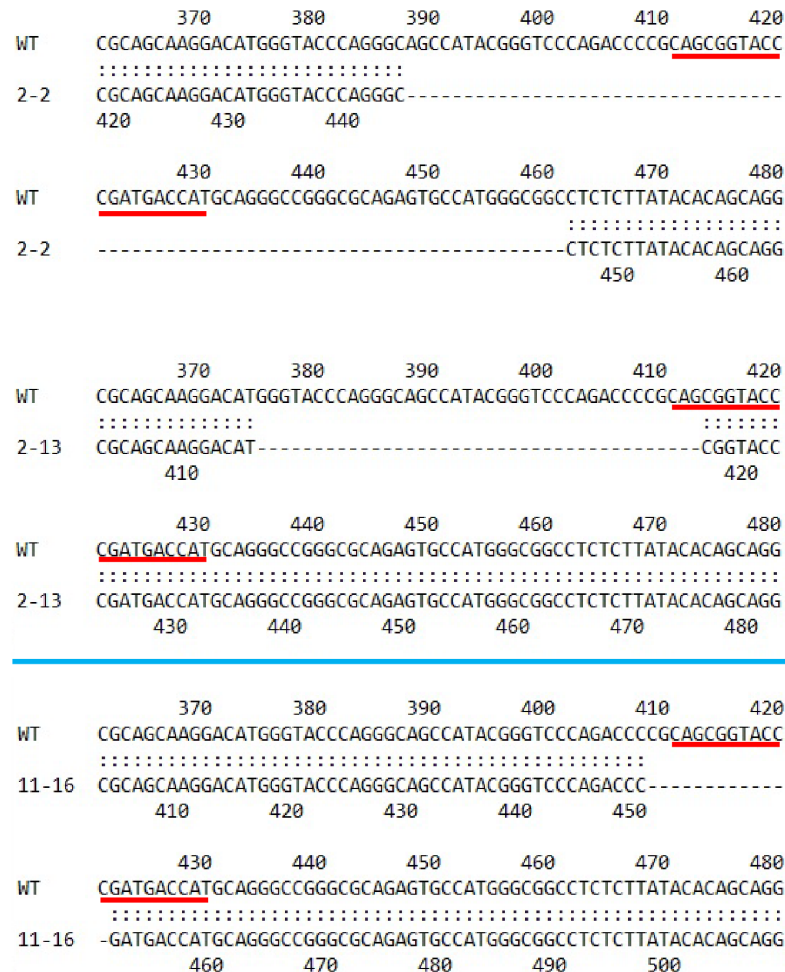**C**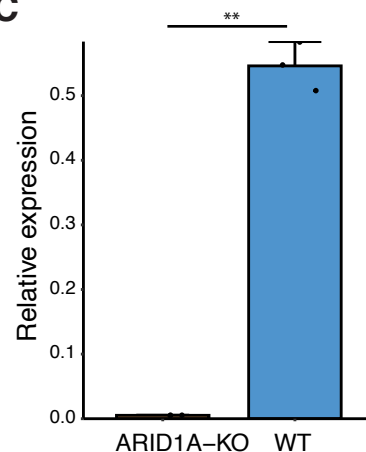**D**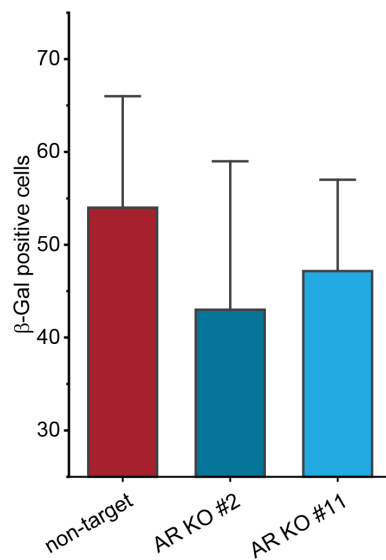

Figure 2-figure supplement 1

Supplement: supp [file elife_poa_e64204_Figure_2_figure_supplement_1.pdf › elife_poa_e64204_Figure_2_figure_supplement_1.pdf]

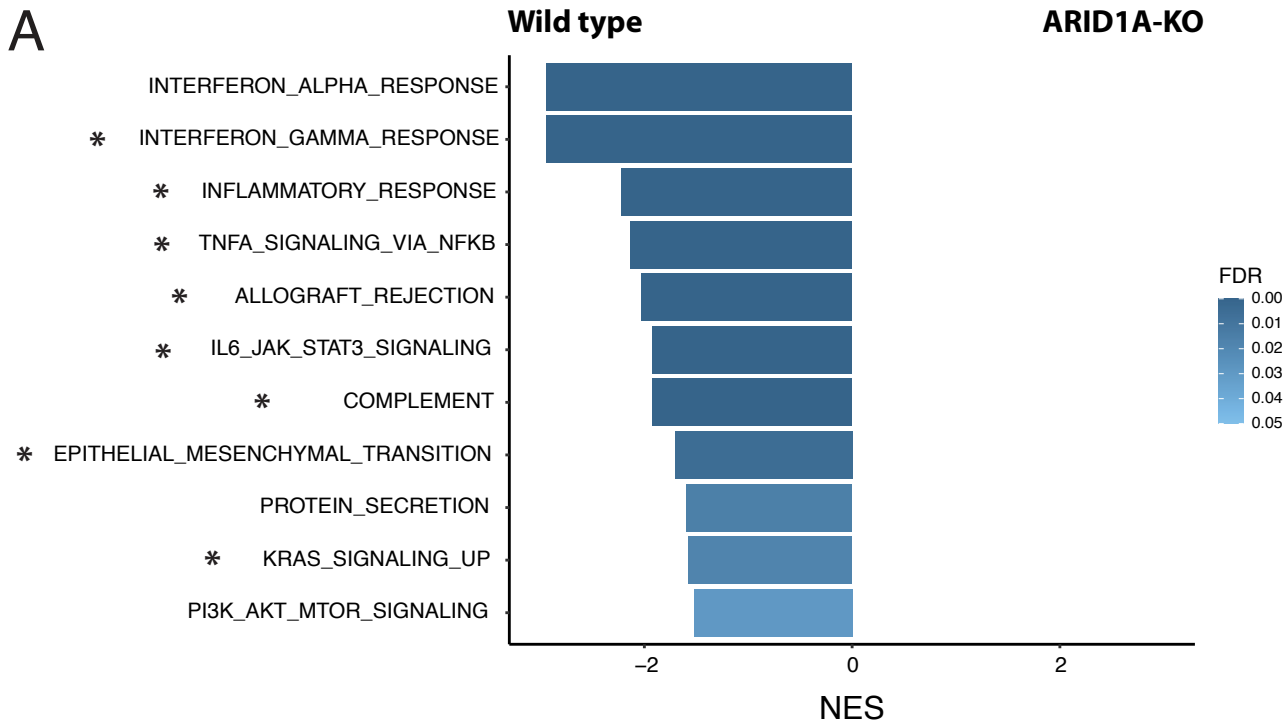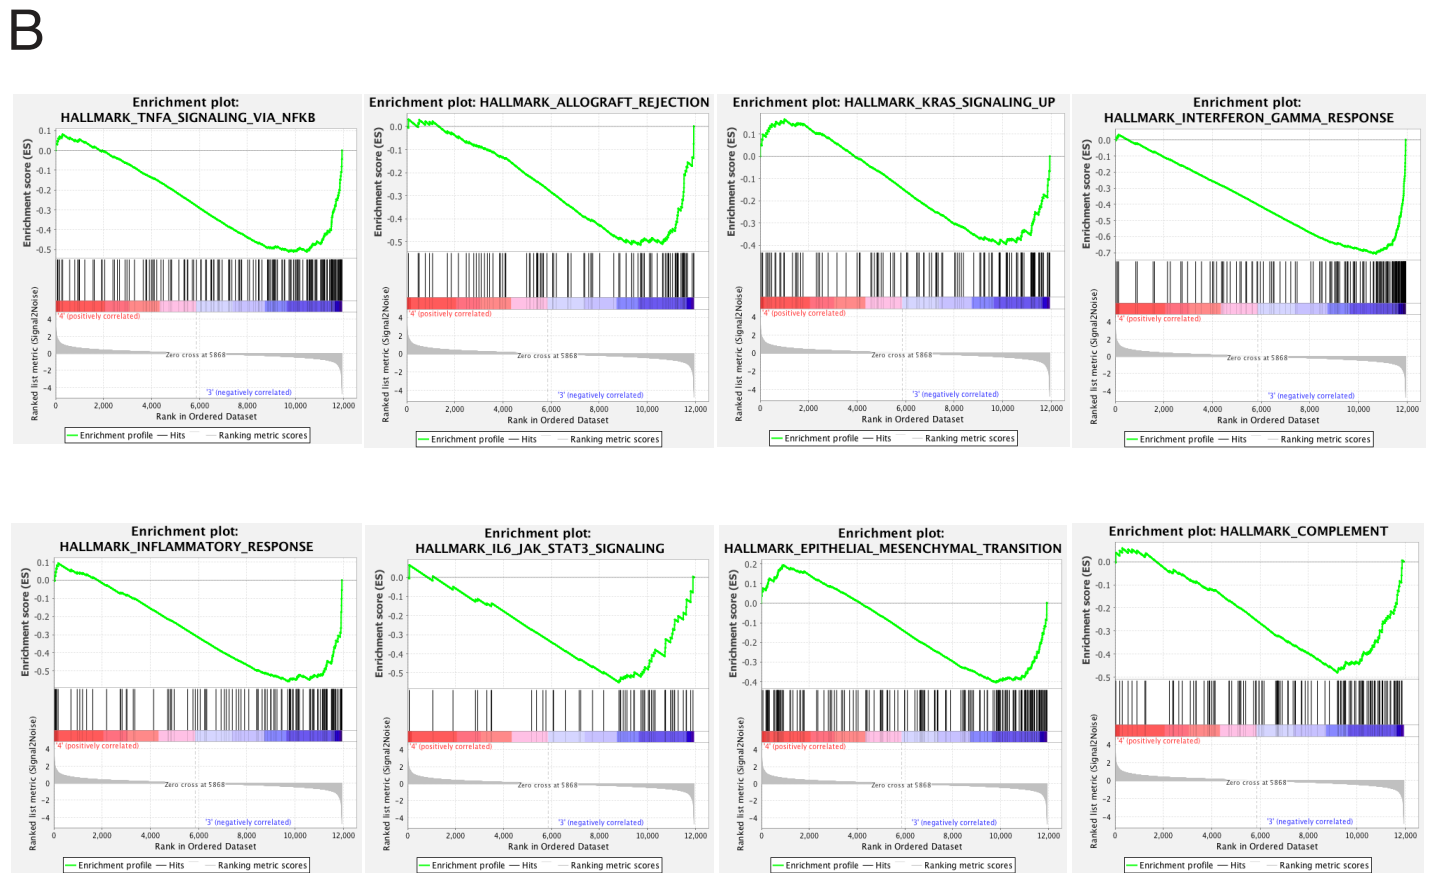

Figure 3-figure supplement 1

Supplement: supp [file elife_poa_e64204_Figure_3_figure_supplement_1.pdf › elife_poa_e64204_Figure_3_figure_supplement_1.pdf]

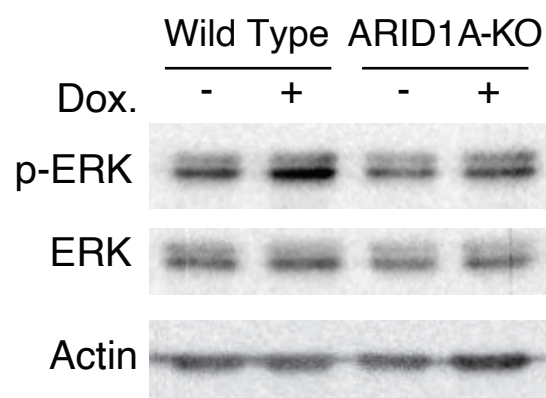

Figure 3-figure supplement 2

Supplement: supp [file elife_poa_e64204_Figure_3_figure_supplement_2.pdf › elife_poa_e64204_Figure_3_figure_supplement_2.pdf]

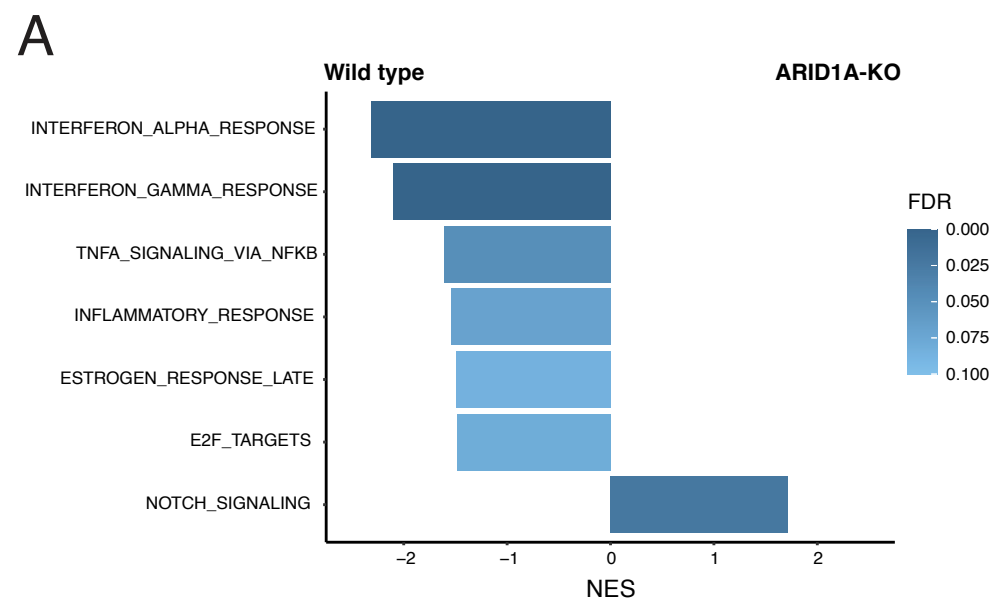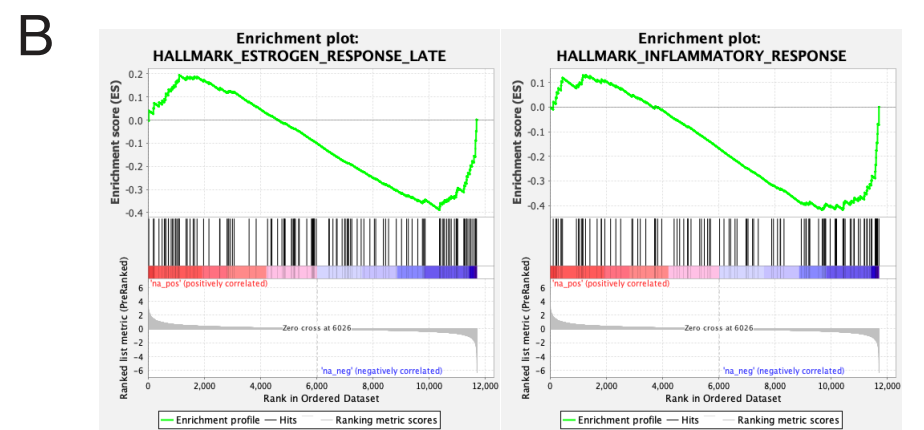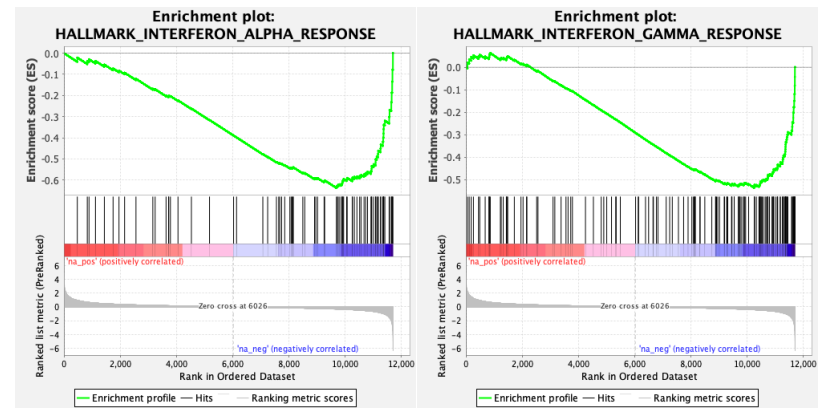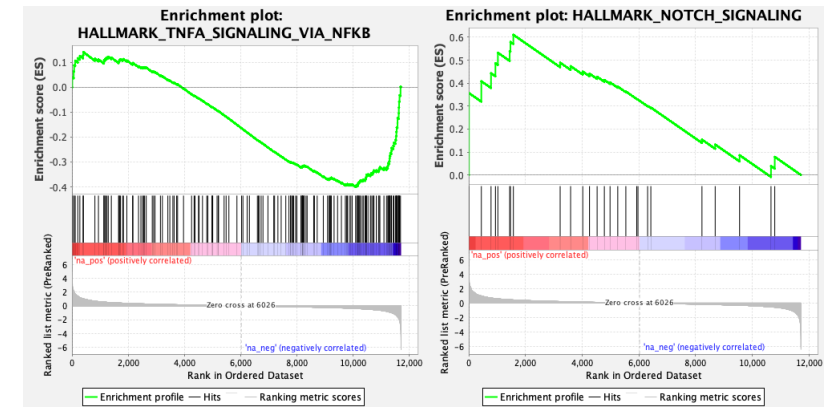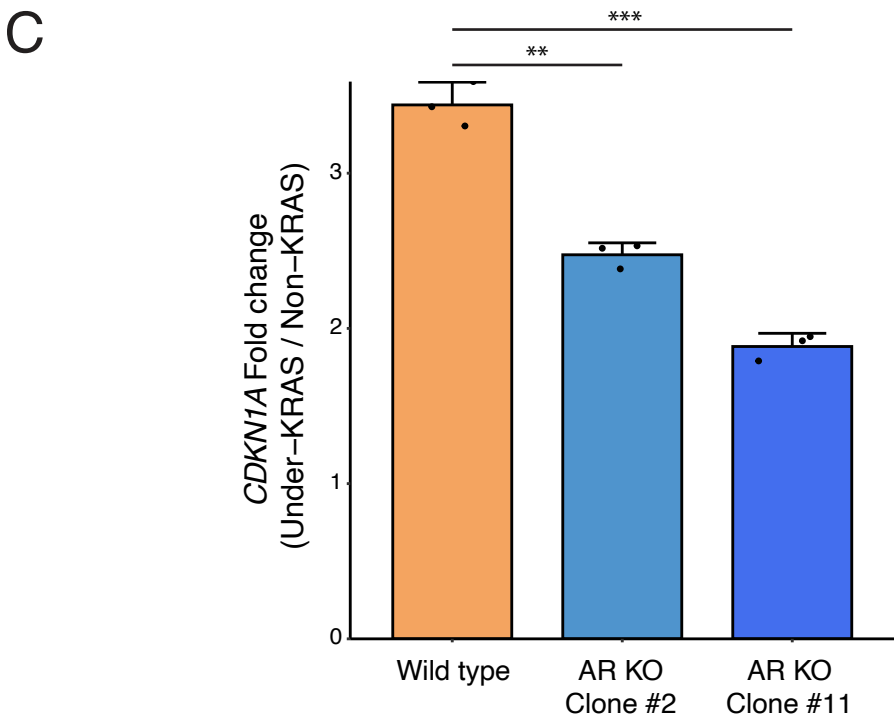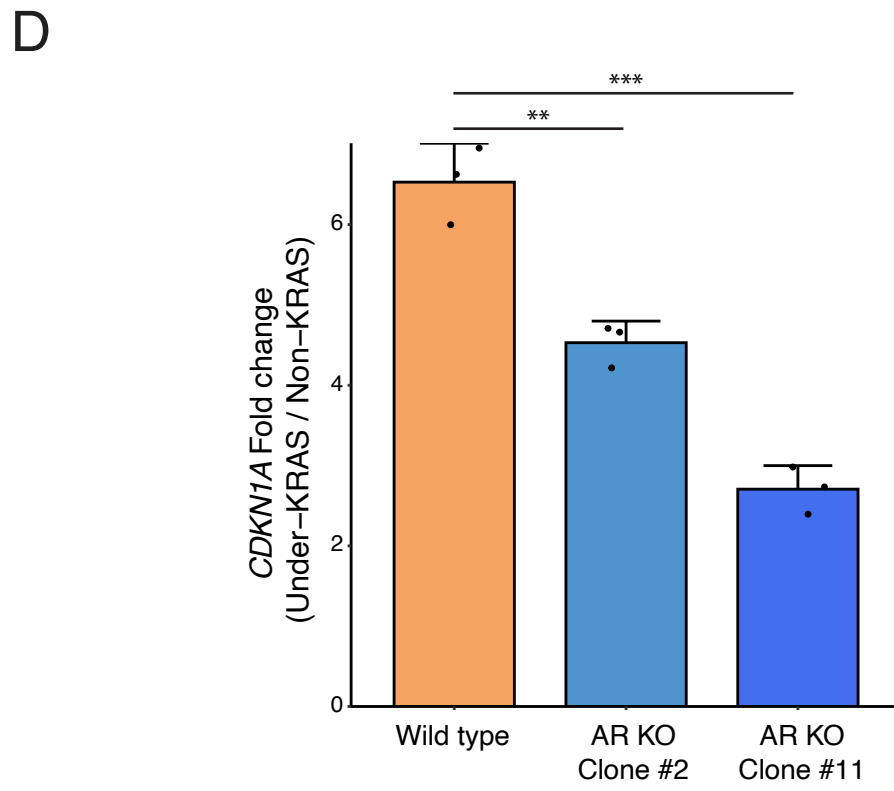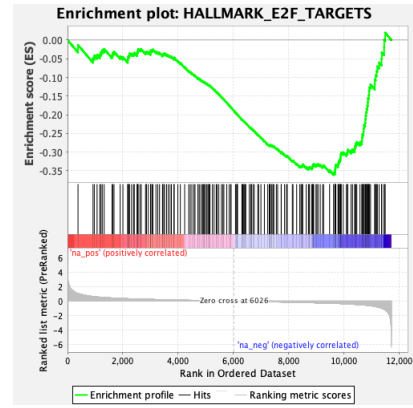

Figure 3-supplement figure 3

Supplement: supp [file elife_poa_e64204_Figure_3_figure_supplement_3.pdf › elife_poa_e64204_Figure_3_figure_supplement_3.pdf]

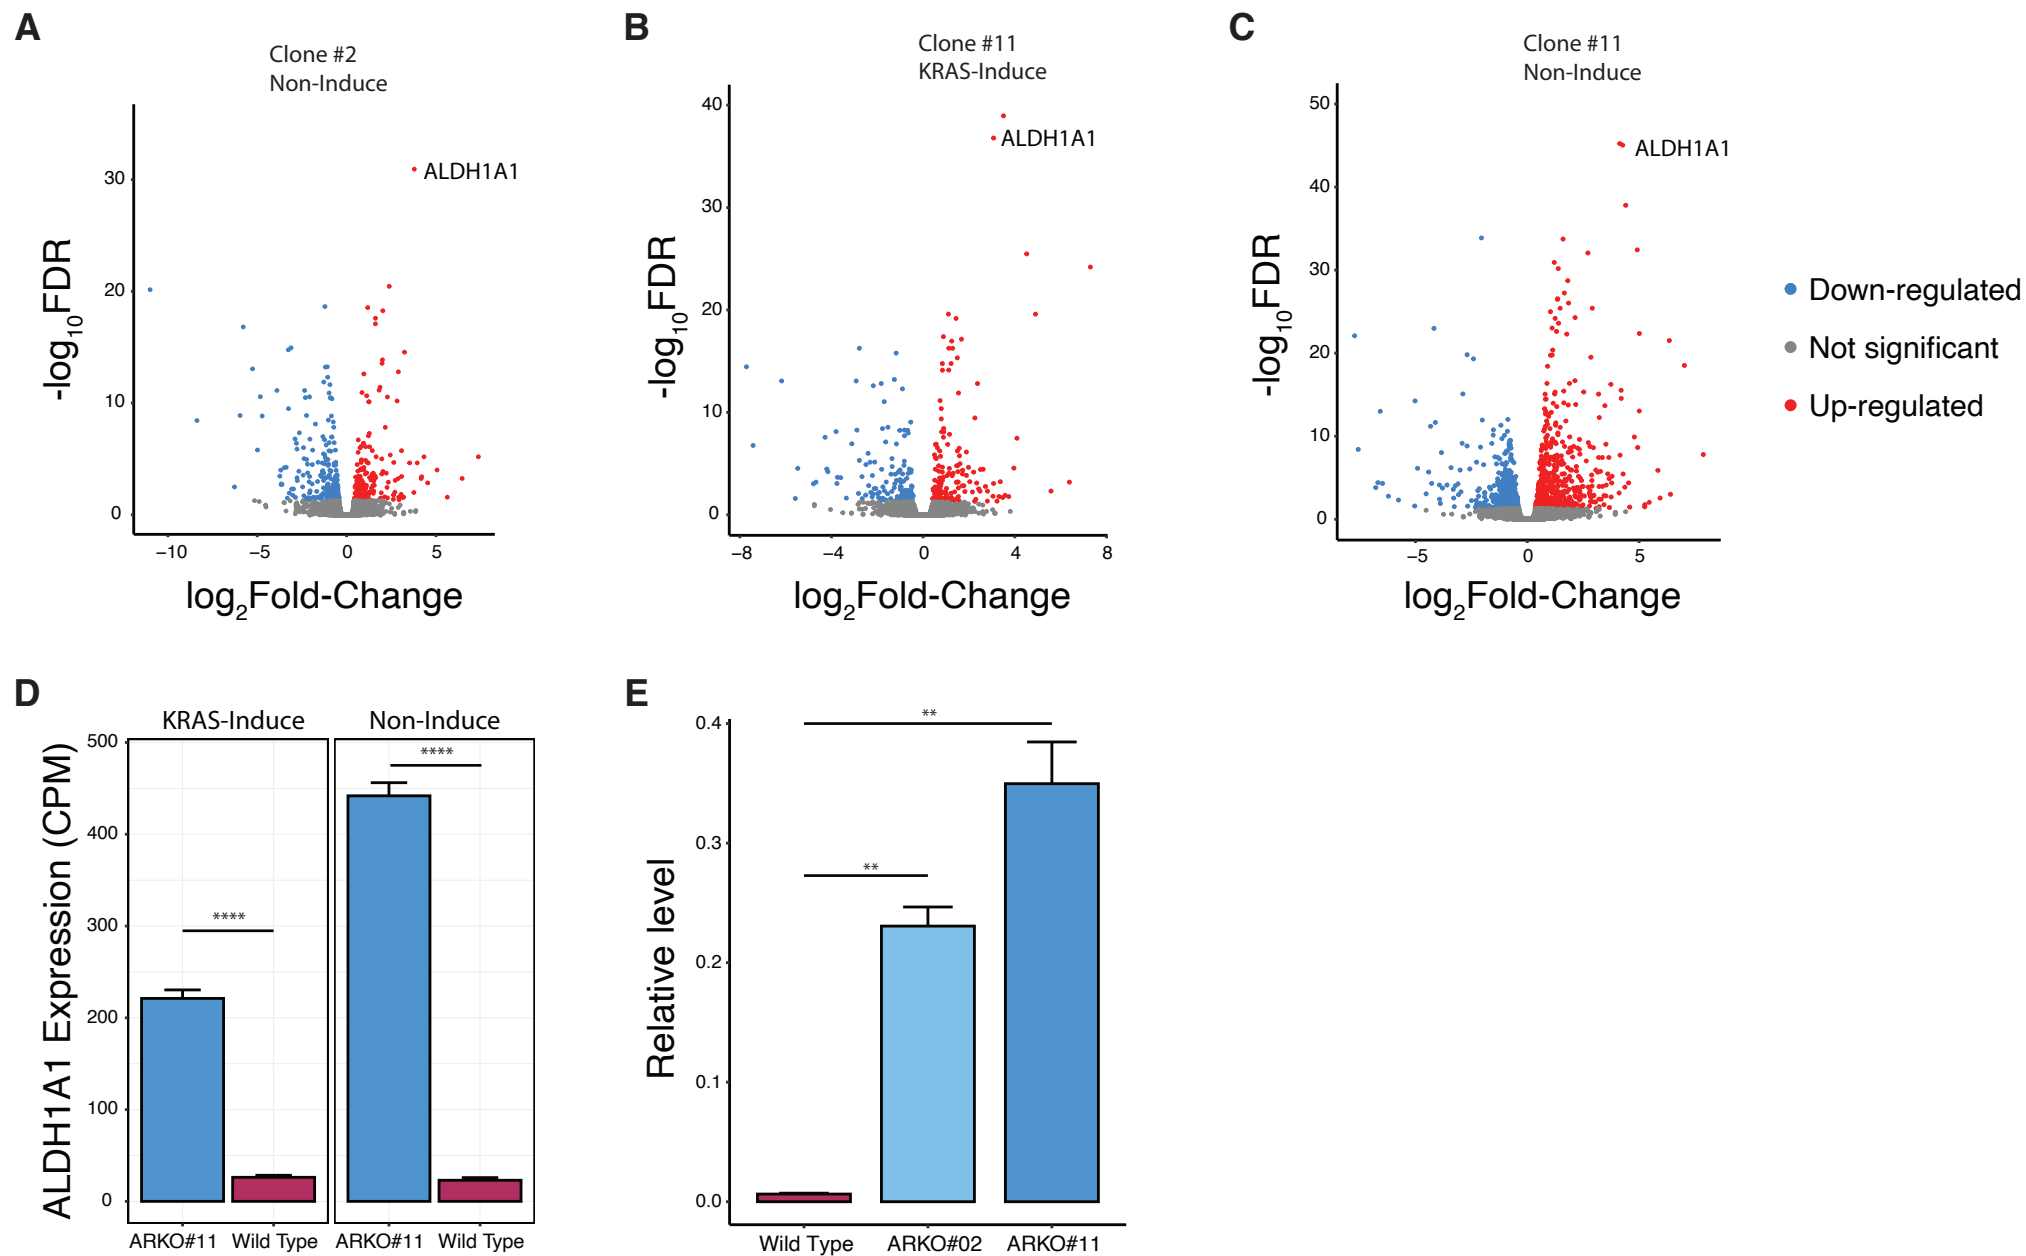

Figure 3-figure supplement 4

Supplement: supp [file elife_poa_e64204_Figure_3_figure_supplement_4.pdf › elife_poa_e64204_Figure_3_figure_supplement_4.pdf]

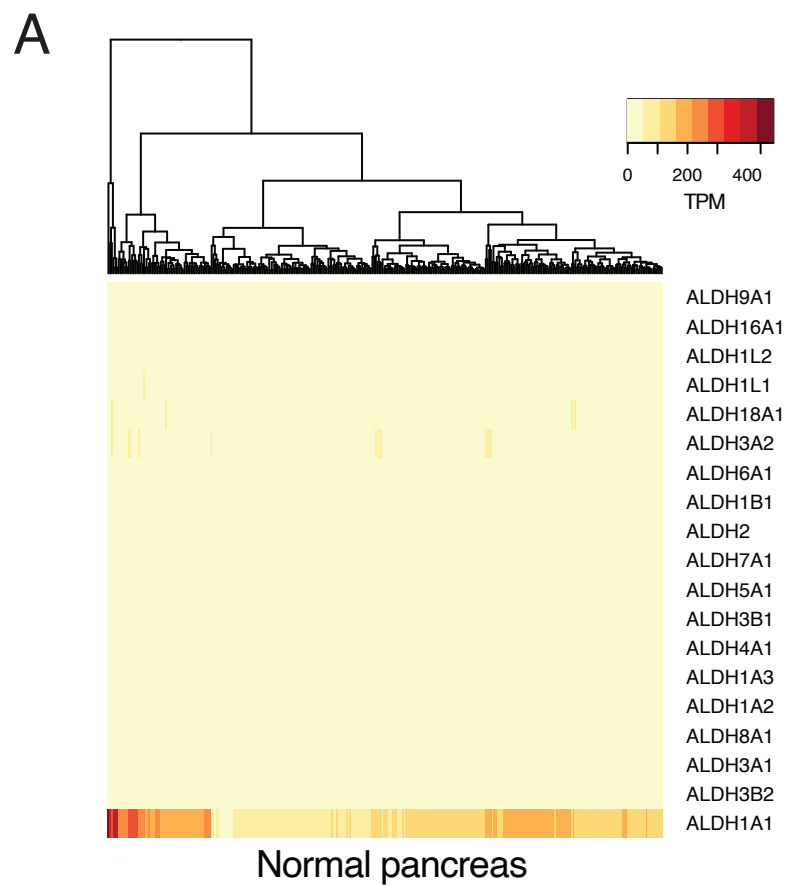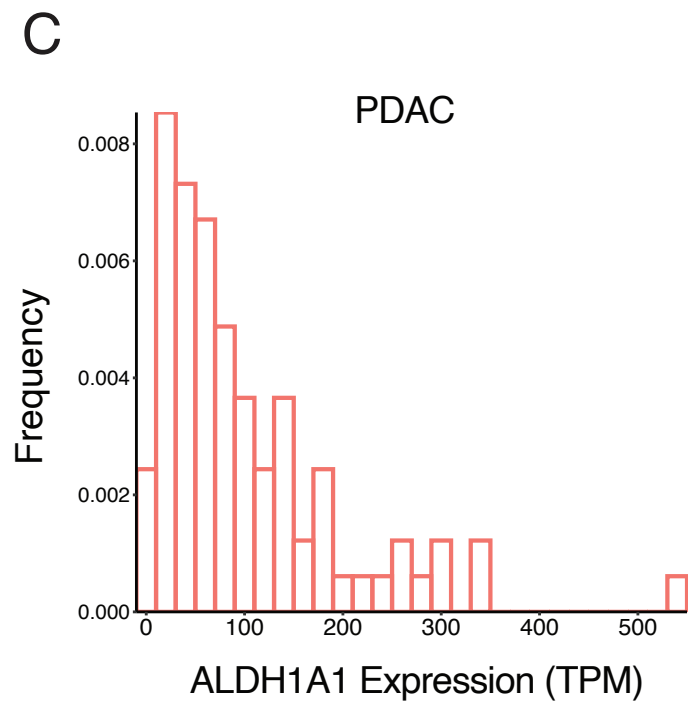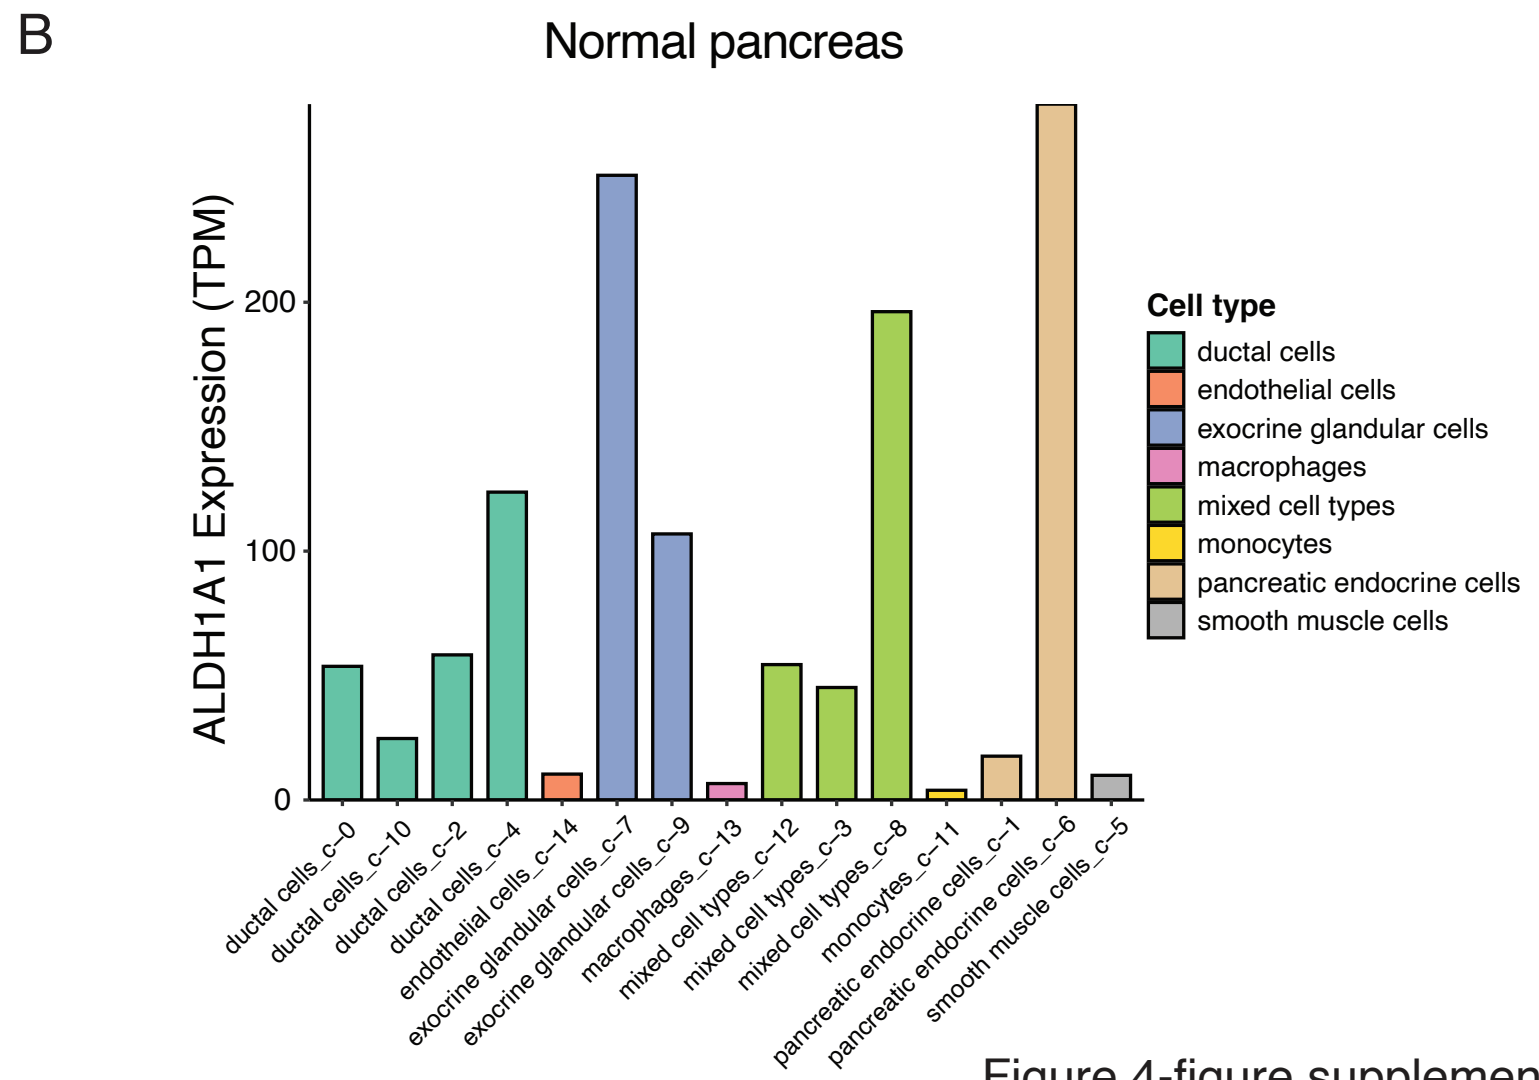

Figure 4-figure supplement 1

Supplement: supp [file elife_poa_e64204_Figure_4_figure_supplement_1.pdf › elife_poa_e64204_Figure_4_figure_supplement_1.pdf]

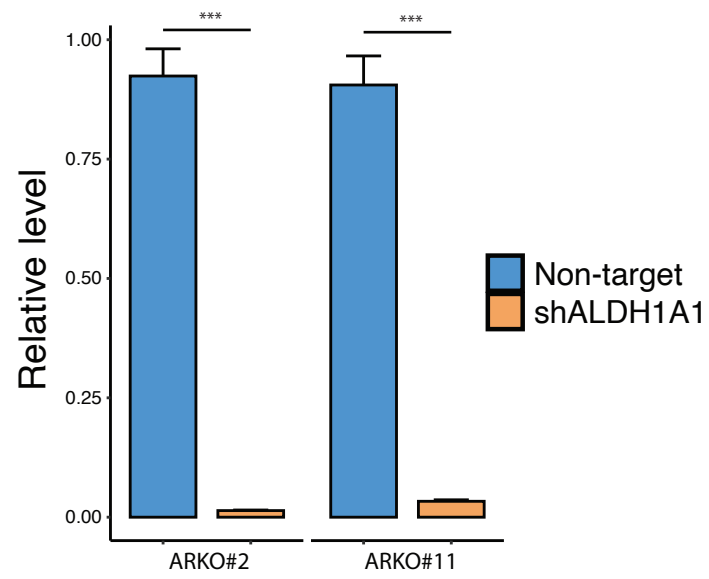

Figure 4-figure supplement 2

Supplement: supp [file elife_poa_e64204_Figure_4_figure_supplement_2.pdf › elife_poa_e64204_Figure_4_figure_supplement_2.pdf]

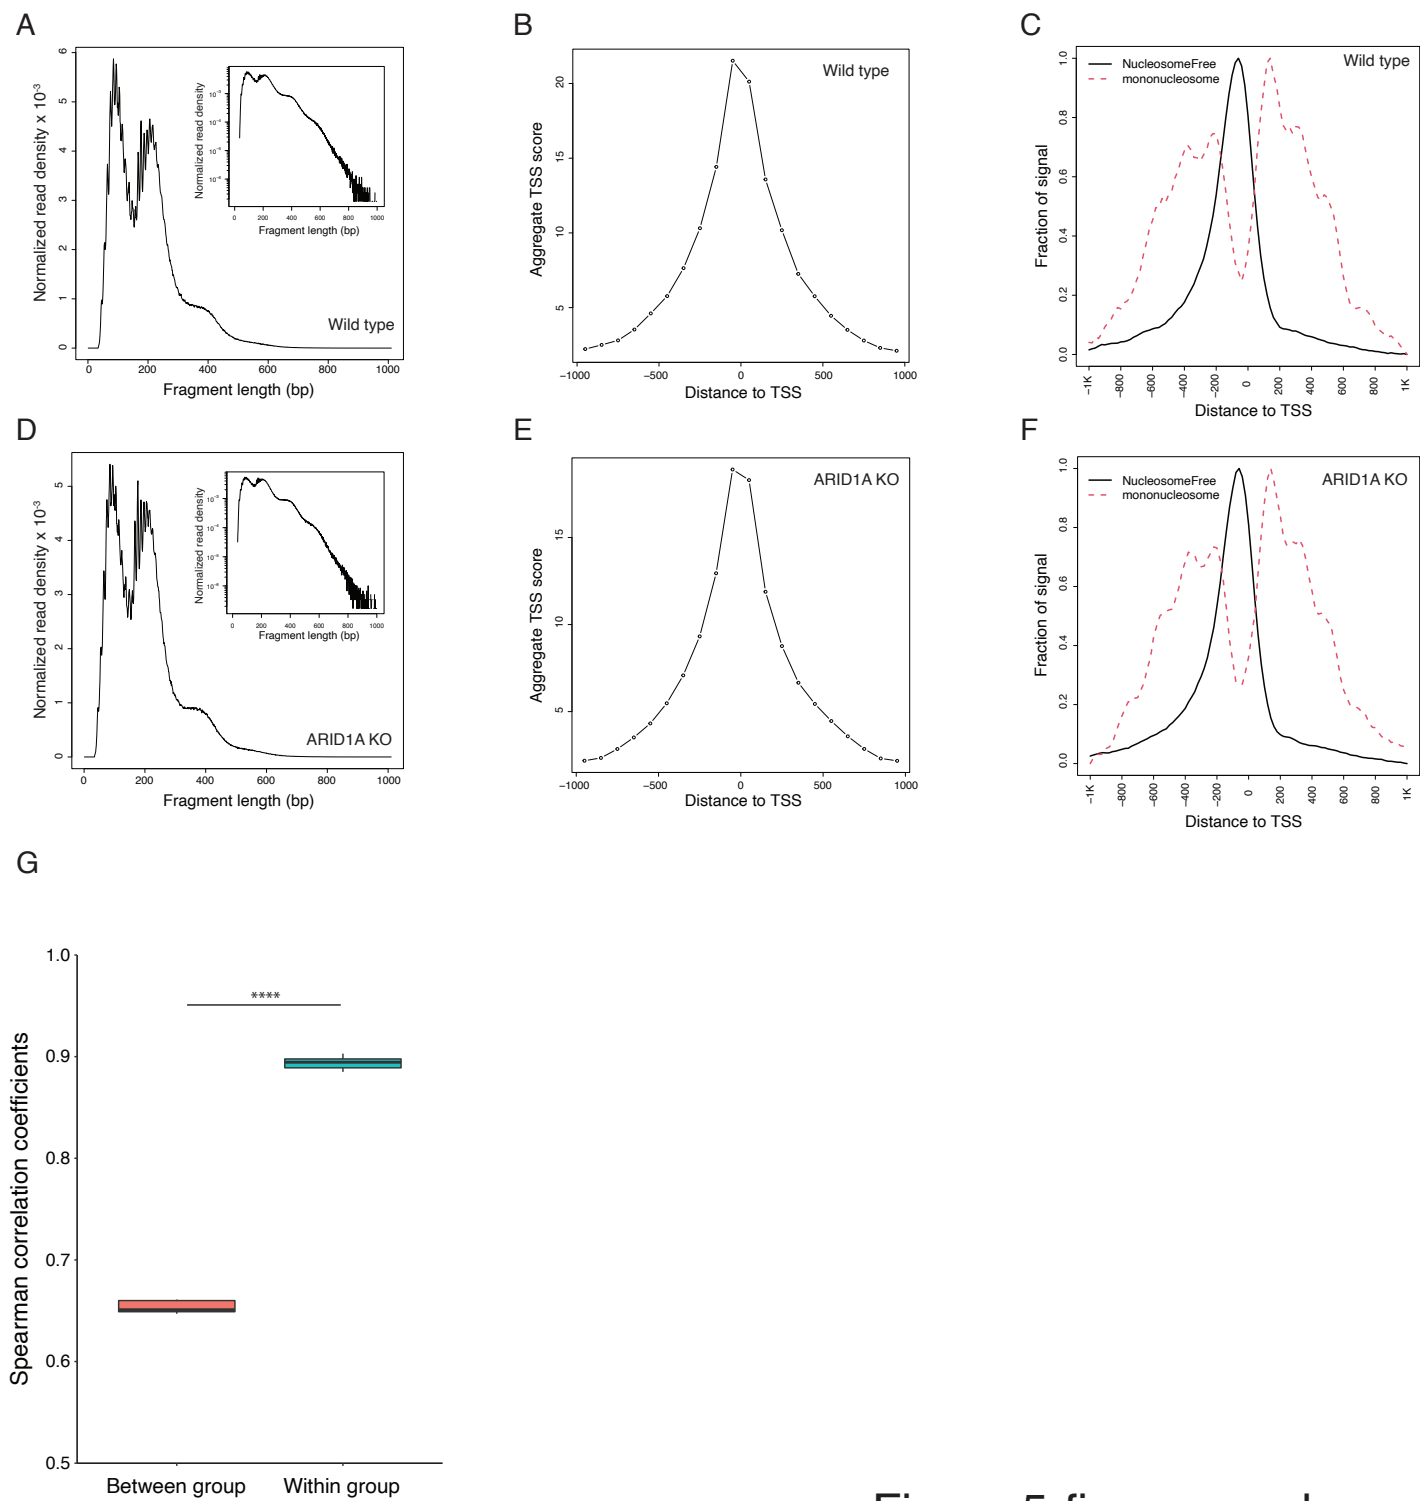

Figure 5-figure supplement 1

Supplement: supp [file elife_poa_e64204_Figure_5_figure_supplement_1.pdf › elife_poa_e64204_Figure_5_figure_supplement_1.pdf]

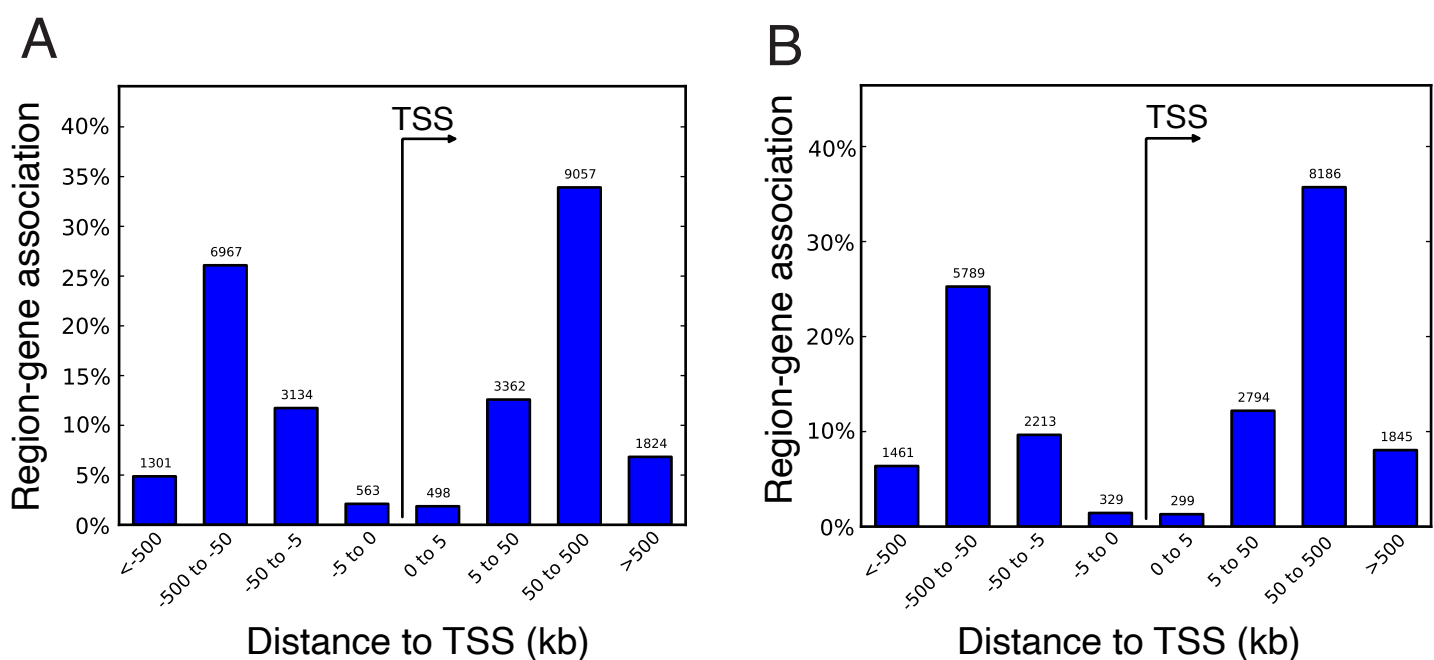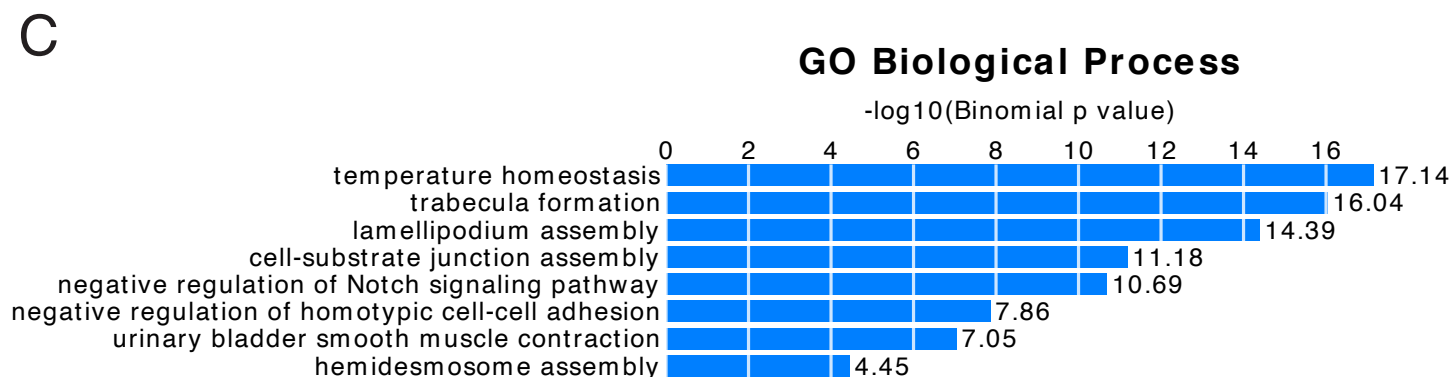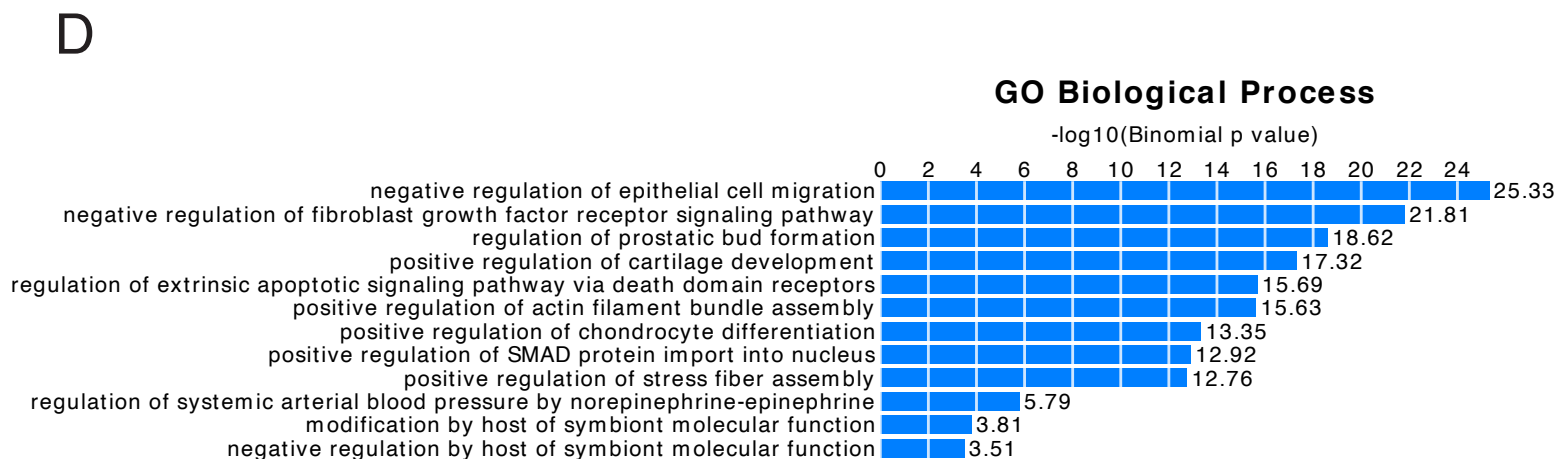

Figure 5-figure supplement 4

Supplement: supp [file elife_poa_e64204_Figure_5_figure_supplement_4.pdf › elife_poa_e64204_Figure_5_figure_supplement_4.pdf]

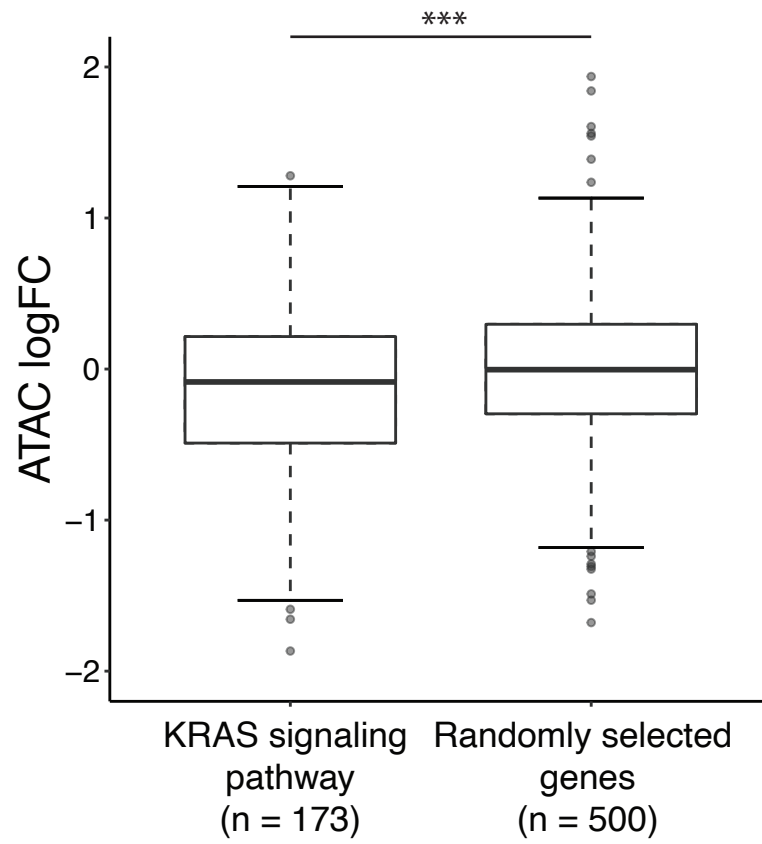

Figure 5-figure supplement 5

Supplement: supp [file elife_poa_e64204_Figure_5_figure_supplement_5.pdf › elife_poa_e64204_Figure_5_figure_supplement_5.pdf]

**A**

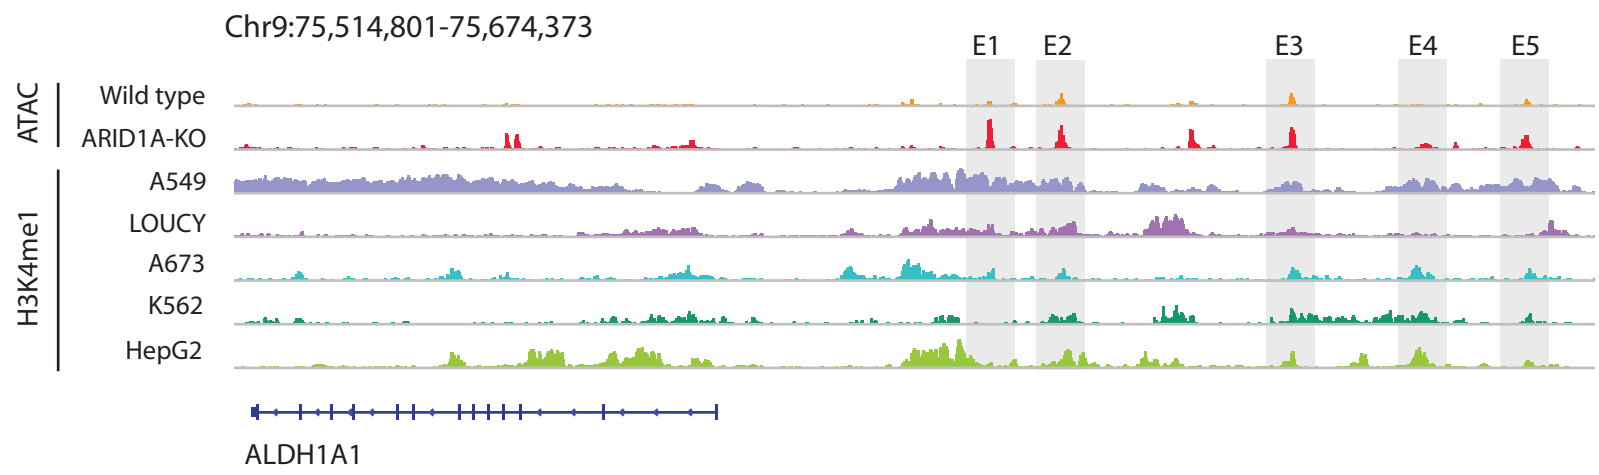

**B**

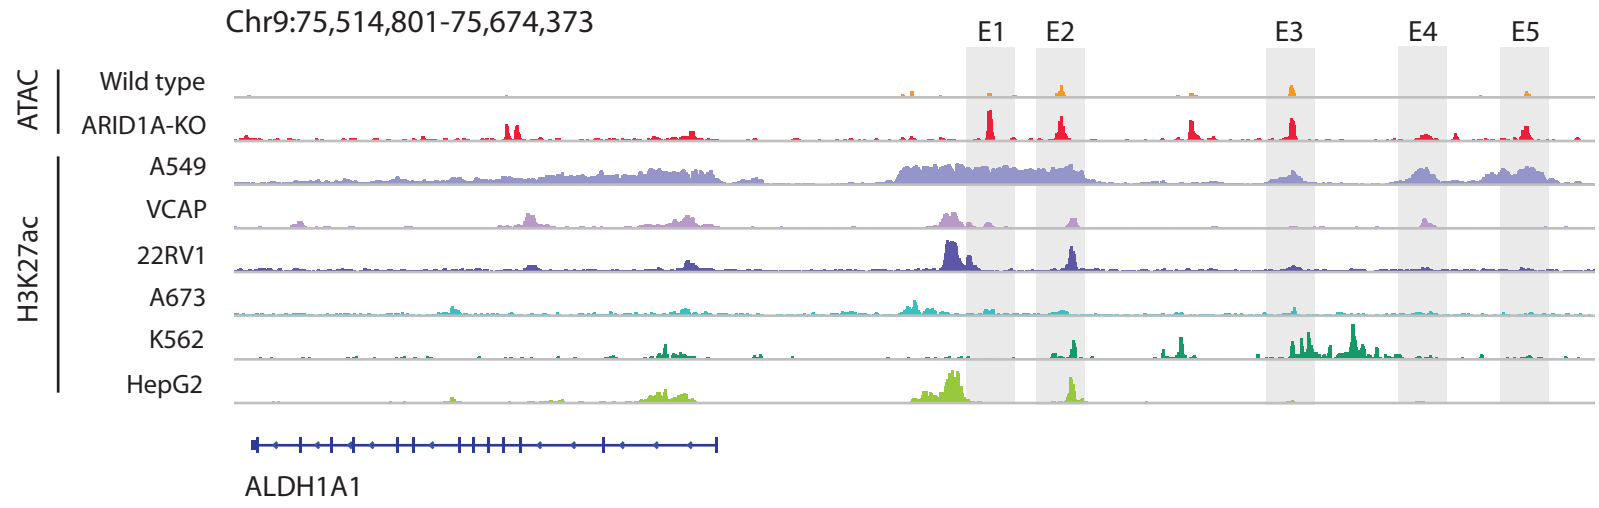

Figure 6- figure supplement 1

Supplement: supp [file elife_poa_e64204_Figure_6_figure_supplement_1.pdf › elife_poa_e64204_Figure_6_figure_supplement_1.pdf]

A

*EP300* Knockdown efficiency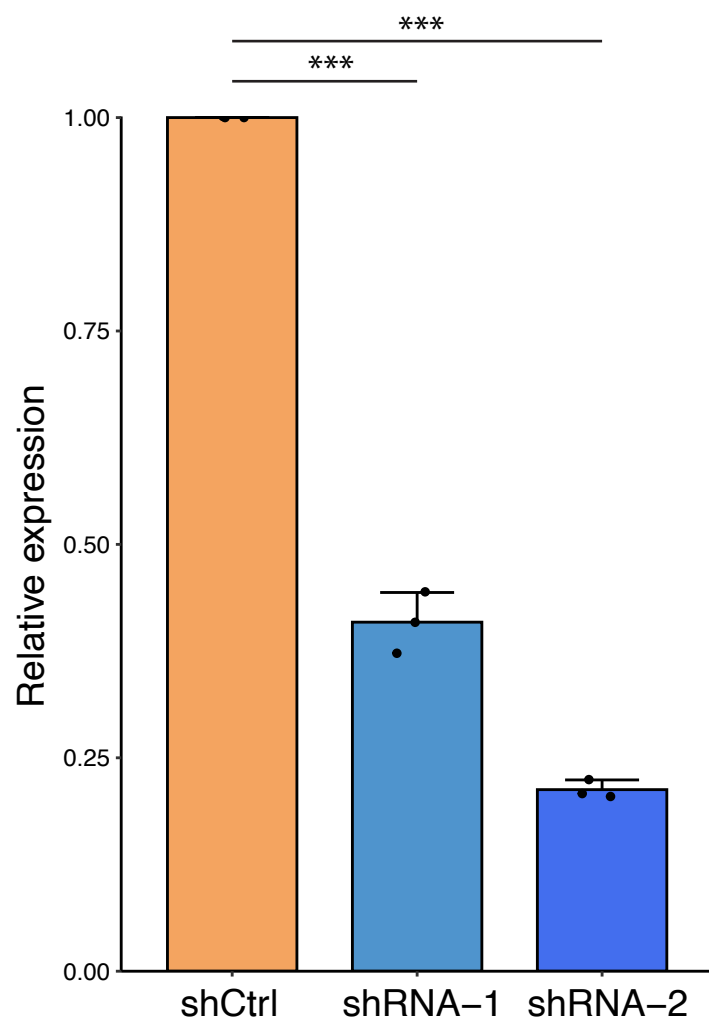

B

*NR3C1* Knockdown efficiency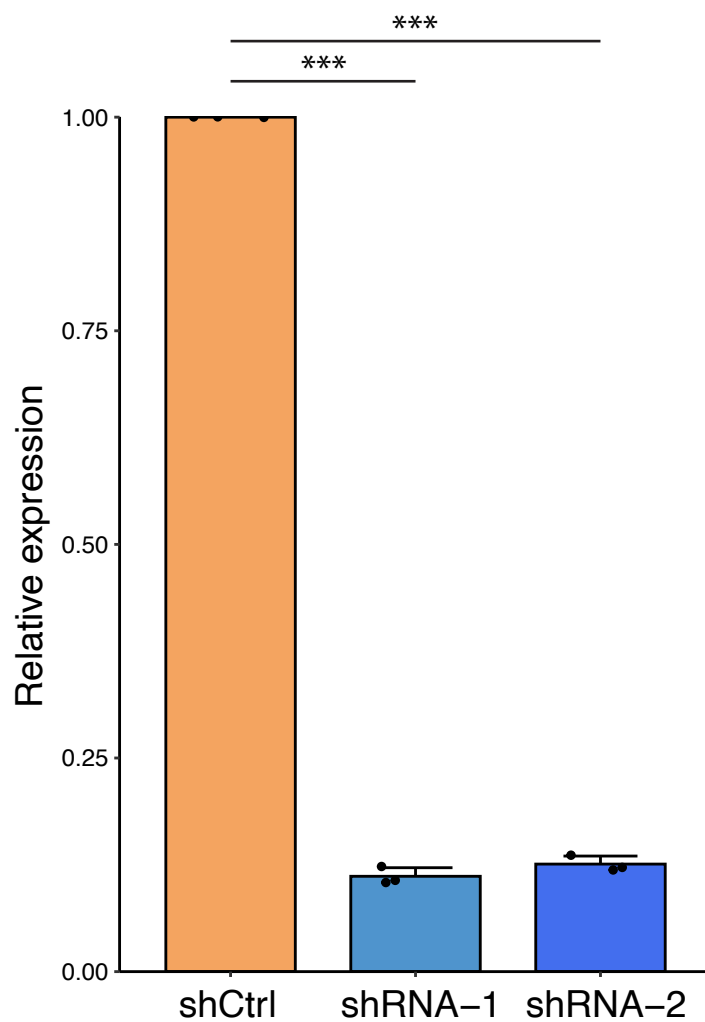

Figure 6-supplement figure 2

Supplement: supp [file elife_poa_e64204_Figure_6_figure_supplement_2.pdf › elife_poa_e64204_Figure_6_figure_supplement_2.pdf]
